# Supplementary material for: Synthesis, in silico, in vitro evaluation of furanyl- and thiophenyl-3-phenyl-1H-indole-2-carbohydrazide derivatives as tubulin inhibitors and anticancer agents
Source: Royal Society of Chemistry journal article supplement (doi:10.1039/d4md00210e), 2024-01-01
Supplement: d4md00210e1.pdf [file d4md00210e1.pdf]

## Supplementary Information

### Synthesis, *in-silico*, *in-vitro* evaluation of furanyl- and thiophenyl-3-phenyl-1*H*-indole-2-carbohydrazone derivatives as tubulin inhibitors and anticancer agents

*Rungroj Saruengkhanphasit*,<sup>1, 2\*</sup> *Lukana Ngiwsara*,<sup>3</sup> *Kriengsak Lirdprapamongkol*,<sup>2, 3</sup>  
*Jaruwan Chatwichien*,<sup>1, 4</sup> *Worawat Niwetmarin*,<sup>1</sup> *Chatchakorn Eurtivong*,<sup>5\*</sup> *Prasat Kittakoop*,<sup>1, 2, 6</sup> *Jisnuson Svasti*,<sup>3</sup> *Somsak Ruchirawat*,<sup>1, 2, 7</sup>

<sup>1</sup> Chulabhorn Graduate Institute, Program in Chemical Sciences, 54 Kamphaeng Phet 6, Talat Bang Khen, Lak Si, Bangkok 10210, Thailand.

<sup>2</sup> Center of Excellence On Environmental Health and Toxicology (EHT), OPS, Ministry of Higher Education, Science, Research and Innovation, Bangkok, Thailand.

<sup>3</sup> Laboratory of Biochemistry, Chulabhorn Research Institute, Bangkok 10210, Thailand.

<sup>4</sup> Chulabhorn Royal Academy, Bangkok 10210, Thailand.

<sup>5</sup> Department of Pharmaceutical Chemistry, Faculty of Pharmacy, Mahidol University, 447 Sri-Ayutthaya Road, Ratchathewi, Bangkok 10400, Thailand.

<sup>6</sup>Laboratory of Natural Products, Chulabhorn Research Institute, Bangkok 10210, Thailand.

<sup>7</sup>Laboratory of Medicinal Chemistry, Chulabhorn Research Institute, Bangkok 10210, Thailand.

### Table of contents

|                                                                                                                                                      |             |
|------------------------------------------------------------------------------------------------------------------------------------------------------|-------------|
| Synthesis of various aldehydes                                                                                                                       | page 2-5    |
| <sup>1</sup> H and <sup>13</sup> C Spectra                                                                                                           | page 6-42   |
| Figure S1. NCI60 one dose screen for compounds <b>5a-b</b> , <b>5e-k</b> , and <b>6a-o</b>                                                           | page 43-66  |
| Table S1. GI <sub>50</sub> and LC <sub>50</sub> screen for compounds <b>5a-b</b> , <b>5e-i</b> , <b>5k</b> , <b>6a-j</b> , <b>6m</b> , and <b>6o</b> | page 67-70  |
| Figure S2. NCI60 five dose screen for compounds <b>5a-b</b> , <b>5e-i</b> , <b>5k</b> , <b>6a-j</b> , <b>6m</b> , and <b>6o</b>                      | page 71-110 |
| Figure S3. Overlay between co-crystallised colchicine                                                                                                | page 111    |
| Table S2. Docking scores of compounds <b>5a-b</b> , <b>5f</b> , <b>5k</b> , <b>6h</b> , and <b>6j</b>                                                | page 111    |
| Table S3. Physicochemical properties of compounds <b>5e-k</b> , and <b>6b-6o</b>                                                                     | page 112    |

## Synthesis of various aldehydes

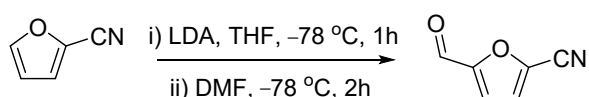

### 5-formylfuran-2-carbonitrile

To a solution of 2-furancarbonitrile (0.5 mL, 5.50 mmol) in anhydrous THF (20 mL) was added LDA (1.5 M, 4.70 mL, 7.05 mmol) at  $-78\text{ }^\circ\text{C}$  under argon atmosphere. The reaction mixture was stirred  $-78\text{ }^\circ\text{C}$  for 1 h. Anhydrous *N,N*-dimethylformamide (0.70 mL, 9.04 mmol) was added slowly at  $-78\text{ }^\circ\text{C}$ . The resulting mixture was stirred at  $-78\text{ }^\circ\text{C}$  for 2 h. The mixture was poured into water 30 mL and was extracted with Et<sub>2</sub>O (3 x 20 ML). The combined organic layers were dried (Na<sub>2</sub>SO<sub>4</sub>), filtered, and the solvent was evaporated. Purification by flash column chromatography, elute with EtOAc-Hexane (1:9 to 4:6), gave 5-formylfuran-2-carbonitrile (0.224 g, 1.85 mmol, 34%) as brown oil; *R<sub>f</sub>* 0.31 [EtOAc-Hexane (3:7)]; <sup>1</sup>H NMR (300 MHz, CDCl<sub>3</sub>)  $\delta$  9.76 (s, 1H), 7.29 (d, *J* = 3.8 Hz, 1H), 7.24 (d, *J* = 3.8 Hz, 1H) Data were in agreement to those reported in the literature.<sup>1</sup>

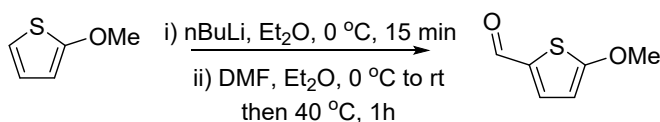

### 5-methoxythiophene-2-carbaldehyde

To a solution of 2-methoxythiophene (0.5 mL, 4.99 mmol) in anhydrous Et<sub>2</sub>O (20 mL) was added *n*BuLi (1.6 M, 3.80 mL, 6.08 mmol) at  $0\text{ }^\circ\text{C}$  under argon atmosphere. The reaction mixture was stirred at  $0\text{ }^\circ\text{C}$  for 1 h and was allowed to stand at room temperature for 15 min. Anhydrous *N,N*-dimethylformamide (0.4 mL, 5.17 mmol) was added slowly at room temperature. The reaction mixture was heated to  $40\text{ }^\circ\text{C}$  for 1 h. The mixture was poured into water 30 mL and was extracted with EtOAc (3 x 20 mL). The combined organic layers were washed with H<sub>2</sub>O (40 mL), dried (Na<sub>2</sub>SO<sub>4</sub>), and the solvent was evaporated. Purification by flash column chromatography, elute with EtOAc-Hexane (1:9 to 3:7), gave 5-methoxythiophene-2-carbaldehyde (0.552 g, 4.38 mmol, 88%) as brown oil; *R<sub>f</sub>* 0.49 [EtOAc-Hexane (3:7)]; <sup>1</sup>H NMR (300 MHz, CDCl<sub>3</sub>)  $\delta$  9.62 (s, 1H), 7.49 (d, *J* = 4.3 Hz, 1H), 6.23 (s, 1H), 6.32 (d, *J* = 4.3 Hz, 1H), 3.96 (s, 3H) Data were in agreement to those reported in the literature.<sup>2</sup>

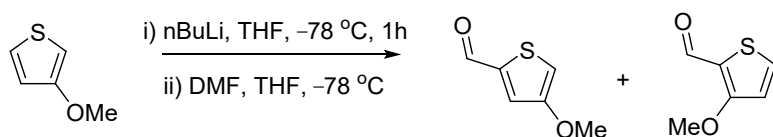

### 4-methoxythiophene-2-carbaldehyde and 3-methoxythiophene-2-carbaldehyde

To a solution of 3-methoxythiophene (0.5 mL, 5.01 mmol) in anhydrous THF (20 mL) was added *n*BuLi (2.5 M, 2.4 mL, 6.00 mmol) at  $-78\text{ }^\circ\text{C}$  under argon atmosphere. The reaction mixture was stirred  $-78\text{ }^\circ\text{C}$  for 1 h. Anhydrous *N,N*-dimethylformamide (0.60 mL, 7.50 mmol) was added slowly at  $-78\text{ }^\circ\text{C}$ . The resulting mixture was allowed to warm to room temperature over 2 h. The mixture was poured into water 30 mL and was extracted with EtOAc (3 x 20 mL). The combined organic layers were washed with H<sub>2</sub>O (40 mL), dried (Na<sub>2</sub>SO<sub>4</sub>), and the solvent was evaporated. Purification by flash column chromatography, elute with EtOAc-Hexane (1:9 to 4:6), gave 4-methoxythiophene-2-carbaldehyde (0.24 g, 1.9 mmol, 38%) as a



yellow solid (form solid when keep in the fridge) and 3-methoxythiophene-2-carbaldehyde (0.29 g, 2.3 mmol, 46%) as a yellow solid.

4-methoxythiophene-2-carbaldehyde;  $R_f$  0.54 [EtOAc-Hexane (3:7)]; m.p. 39-41 °C;  $\nu_{\max}/\text{cm}^{-1}$  3009, 2962, 2801, 2704, 1663, 1460, 1027;  $^1\text{H NMR}$  (300 MHz,  $\text{CDCl}_3$ )  $\delta$  9.84 (d,  $J = 1.2$  Hz, 1H), 7.42 (d,  $J = 1.8$  Hz, 1H), 6.77 (br t,  $J = 1.5$  Hz, 1H), 3.86 (s, 3H);  $^{13}\text{C NMR}$  (75 MHz,  $\text{CDCl}_3$ )  $\delta$  182.83, 158.88, 141.42, 126.39, 107.75, 57.74; HRMS (ESI)  $m/z$   $[\text{M}+\text{H}]^+$  calcd for  $\text{C}_6\text{H}_7\text{O}_2^{32}\text{S}$  143.0161; found 143.0164.

3-methoxythiophene-2-carbaldehyde;  $R_f$  0.36 [EtOAc-Hexane (3:7)]; m.p. 77-80 °C;  $^1\text{H NMR}$  (300 MHz,  $\text{CDCl}_3$ )  $\delta$  10.01 (d,  $J = 1.20$  Hz, 1H), 7.68 (dd,  $J = 5.40, 1.20$  Hz, 1H), 6.90 (d,  $J = 5.40$  Hz, 1H), 4.01 (s, 3H) Data were in agreement to those reported in the literature.<sup>3</sup>

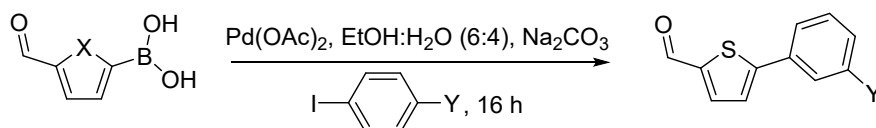

### 5-(3-nitrophenyl)furan-2-carbaldehyde

To a solution of 1-iodo-3-nitrobenzene (0.403 g, 1.62 mmol) and 5-formyl-2-furanboronic acid (0.249 g, 1.78 mmol) in EtOH/H<sub>2</sub>O (6:4, 15 mL), were added Pd(OAc)<sub>2</sub> (0.018 g, 0.08 mmol) and Na<sub>2</sub>CO<sub>3</sub> (0.172 g, 1.62 mmol) at room temperature. The resulting mixture was stirred at room temperature for 16 h. the mixture was filtered through a sintered glass filter, the filter cake was rinsed with EtOAc 30 mL, and most of EtOAc and EtOH was evaporated. The solution was extracted with EtOAc (3 x 20 mL). The combined organic layers were dried (Na<sub>2</sub>SO<sub>4</sub>), filtered, and the solvent was evaporated. Purification by flash column chromatography, elute with EtOAc-Hexane (1:9 to 4:6), gave 5-(3-nitrophenyl)furan-2-carbaldehyde (0.328 g, 1.51 mmol, 93%) as yellow solid;  $R_f$  0.34 [EtOAc-Hexane (3:7)]; m.p. 156-158 °C, lit<sup>4</sup> m.p. 159.5-160.5 °C;  $^1\text{H NMR}$  (300 MHz,  $\text{CDCl}_3$ )  $\delta$  9.75 (s, 1H), 8.66 (s, 1H), 8.28 (d,  $J = 8.1$  Hz, 1H), 8.19 (d,  $J = 7.9$  Hz, 1H), 7.68 (t,  $J = 8.0$  Hz, 1H), 7.40 (d,  $J = 3.8$  Hz, 1H), 7.04 (d,  $J = 3.8$  Hz, 1H) Data were in agreement to those reported in the reterature.<sup>5</sup> Compounds below were synthesized following the procedure described here.

### 5-(3-methoxyphenyl)furan-2-carbaldehyde

Orange solid (0.399 g, 1.97 mmol, 86%);  $R_f$  0.54 [EtOAc-Hexane (3:7)]; m.p. 69-71 °C, lit<sup>4</sup> m.p. 70.5-71.5 °C;  $\nu_{\max}/\text{cm}^{-1}$  3004, 2964, 2836, 2729, 1663, 1471, 1026;  $^1\text{H NMR}$  (300 MHz,  $\text{CDCl}_3$ )  $\delta$  9.68 (s, 1H), 7.44-7.37 (m, 3H), 7.35 (d,  $J = 3.7$  Hz, 1H), 6.99 (ddd,  $J = 7.8, 2.8, 1.4$  Hz, 1H), 6.87 (d,  $J = 3.8$  Hz, 1H), 3.90 (s, 3H);  $^{13}\text{C NMR}$  (75 MHz,  $\text{CDCl}_3$ )  $\delta$  177.31, 160.04, 159.31, 152.02, 130.22, 130.08, 123.60, 117.93, 115.76, 110.32, 108.03, 55.48; HRMS (ESI)  $m/z$   $[\text{M}+\text{H}]^+$  calcd for  $\text{C}_{12}\text{H}_{11}\text{O}_3$  203.0703; found 203.0704.

### 5-(3-nitrophenyl)thiophene-2-carbaldehyde

Yellow solid (0.219 g, 0.94 mmol, 54%);  $R_f$  0.4 [EtOAc-Hexane (3:7)]; m.p.149-152 °C, lit<sup>5</sup> m.p. 147 °C;  $^1\text{H NMR}$  (300 MHz,  $\text{CDCl}_3$ )  $\delta$  9.96 (s, 1H), 8.55 (br t,  $J = 2$  Hz, 1H), 8.29 (ddd,  $J = 8.3, 2.2, 1.0$  Hz, 1H), 8.02 (ddd,  $J = 7.8, 1.9, 1.0$  Hz, 1H), 7.83 (d,  $J = 4$  Hz, 1H), 7.69 (t,  $J = 8$  Hz, 1H), 7.57 (d,  $J = 3.9$  Hz, 1H) Data were in agreement to those reported in the literature.<sup>6</sup>

### 5-(3-methoxyphenyl)thiophene-2-carbaldehyde

Yellow oil (0.321 g, 1.47 mmol, 98%);  $R_f$  0.58 [EtOAc-Hexane (3:7)];  $\nu_{\max}/\text{cm}^{-1}$  3006, 2939, 2835, 2799, 1658, 1437, 1214;  $^1\text{H NMR}$  (300 MHz,  $\text{CDCl}_3$ )  $\delta$  9.92 (s, 1H), 7.77 (d,  $J = 4.0$  Hz, 1H), 7.43 (d,  $J = 3.9$  Hz, 1H), 7.38 (t,  $J = 7.9$  Hz, 1H), 7.31-7.27 (m, 1H), 7.21 (br t,  $J = 2.1$

Hz), 6.99 (ddd,  $J = 8.1, 2.5, 1.1$  Hz, 3.89 (s, 3H);  $^{13}\text{C}$  NMR (75 MHz,  $\text{CDCl}_3$ )  $\delta$  182.85, 160.09, 154.10, 142.46, 137.39, 134.31, 130.29, 124.34, 118.96, 114.91, 112.07, 55.40; HRMS (ESI)  $m/z$   $[\text{M}+\text{H}]^+$  calcd for  $\text{C}_{12}\text{H}_{11}\text{O}_2^{32}\text{S}$  219.0474; found 219.0475.

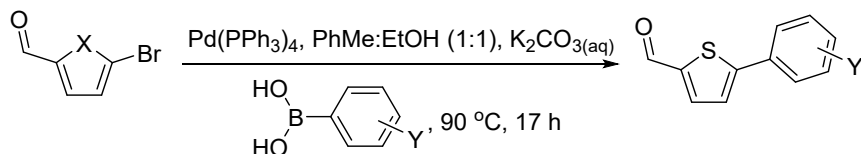

#### 4-(5-formylfuran-2-yl)benzoic acid

To a solution of 5-bromo-2-furaldehyde (0.209 g, 1.19 mmol) and 4-carboxyphenylboronic acid (0.201 g, 1.46 mmol) in toluene/EtOH (1:1, 20 mL), was added  $\text{K}_2\text{CO}_3$  (0.506 g, 3.66 mmol) and  $\text{H}_2\text{O}$  3 mL. The mixture was put in sonicator for 10 min, and then  $\text{Pd}(\text{PPh}_3)_4$  (0.071 g, 0.06 mmol) was added. The resulting mixture was heated to 90 °C and stirred for 17 h. The reaction mixture was cool to room temperature, filtered through a sintered glass filter, the filter cake was rinsed with EtOH 40 mL, and solvent was evaporated.  $\text{H}_2\text{O}$  15 mL was added to the residue. The resulting solution was added conc. HCl until the pH of solution adjusted to 1–2. The precipitate product was filtered, washed with  $\text{H}_2\text{O}$  (3 x 10 mL) and dried over night to gave 4-(5-formylfuran-2-yl)benzoic acid (0.203 g, 0.94 mmol, 77%) as orange solid; m.p. not determined;  $\nu_{\text{max}}/\text{cm}^{-1}$  3121, 2845, 1667, 1609, 1419, 1043;  $^1\text{H}$  NMR (300 MHz,  $\text{CDCl}_3$ )  $\delta$  13.14 (br s, 1H), 9.66 (s, 1H), 8.07–7.97 (m, 4H), 7.69 (d,  $J = 3.8$  Hz, 1H), 7.45 (d,  $J = 3.8$  Hz, 1H);  $^{13}\text{C}$  NMR (75 MHz,  $\text{CDCl}_3$ )  $\delta$  178.68, 167.19, 157.36, 152.65, 132.77, 131.71, 130.60, 125.46, 111.04; HRMS (ESI)  $m/z$   $[\text{M}+\text{H}]^+$  calcd for  $\text{C}_{12}\text{H}_9\text{O}_4$  217.0495; found 217.0503. Compounds below were synthesized following the procedure described here.

#### 3-(5-formylfuran-2-yl)benzoic acid

Orange solid (0.242 g, 1.12 mmol, 89%); m.p. not determined;  $\nu_{\text{max}}/\text{cm}^{-1}$  3100, 2836, 1666, 1610, 1454, 1292, 1041;  $^1\text{H}$  NMR (300 MHz,  $\text{CDCl}_3$ )  $\delta$  13.30 (br s, 1H), 9.64 (s, 1H), 8.38 (t,  $J = 1.7$  Hz, 1H), 8.14 (dt,  $J = 7.9, 1.5$  Hz, 1H), 8.02 (dt,  $J = 7.8, 1.4$  Hz, 1H), 7.68–7.62 (m, 2H), 7.43 (d,  $J = 3.8$  Hz, 1H);  $^{13}\text{C}$  NMR (75 MHz,  $\text{CDCl}_3$ )  $\delta$  178.57, 167.20, 157.51, 152.38, 132.25, 130.67, 130.14, 129.67, 129.49, 125.78, 110.03; HRMS (ESI)  $m/z$   $[\text{M}+\text{H}]^+$  calcd for  $\text{C}_{12}\text{H}_9\text{O}_4$  217.0495; found 217.0497.

#### 4-(5-formylthiophene-2-yl)benzoic acid

Yellow solid (0.144 g, 0.62 mmol, 33%); m.p. not determined;  $^1\text{H}$  NMR (300 MHz,  $\text{CDCl}_3$ )  $\delta$  13.15 (br s, 1H), 9.95 (s, 1H), 8.10 (d,  $J = 4.0$  Hz, 1H), 8.04–7.93 (m, 4H), 7.89 (d,  $J = 4.0$  Hz, 1H) Data were in agreement to those reported in the literature.<sup>7</sup>

#### 3-(5-formylthiophene-2-yl)benzoic acid

Orange solid (0.40 g, 1.72 mmol, 92%); m.p. not determined;  $\nu_{\text{max}}/\text{cm}^{-1}$  3108, 2858, 1719, 1680, 1654, 1426, 1232, 1056;  $^1\text{H}$  NMR (300 MHz,  $\text{CDCl}_3$ )  $\delta$  13.27 (br s, 1H), 9.94 (s, 1H), 8.27 (br t,  $J = 1.8$  Hz, 1H), 8.08–8.04 (m, 2H), 8.01 (dt,  $J = 7.8, 1.3$  Hz, 1H), 7.85 (d,  $J = 4.0$  Hz, 1H), 7.63 (t,  $J = 7.8$  Hz, 1H);  $^{13}\text{C}$  NMR (75 MHz,  $\text{CDCl}_3$ )  $\delta$  184.66, 167.17, 151.70, 142.96, 139.68, 133.28, 132.40, 130.90, 130.56, 130.33, 127.02, 126.53; HRMS (ESI)  $m/z$   $[\text{M}-\text{H}]^-$  calcd for  $\text{C}_{12}\text{H}_7\text{O}_3^{32}\text{S}$  231.0110; found 231.0114.

#### 5-(4-hydroxyphenyl)furan-2-carbaldehyde

To a solution of 5-bromo-2-furaldehyde (0.234 g, 1.34 mmol) and 4-hydroxyphenylboronic acid (0.222 g, 1.61 mmol) in toluene/EtOH (1:1, 24 mL), was added  $\text{K}_2\text{CO}_3$  (0.556 g, 4.02

mmol) and H<sub>2</sub>O 4 mL. The mixture was put in sonicator for 10 min, and then Pd(PPh<sub>3</sub>)<sub>4</sub> (0.077 g, 0.07 mmol) was added. The resulting mixture was heated to 90 °C and stirred for 17 h. The reaction mixture was cool to room temperature, diluted with H<sub>2</sub>O 20 mL, and extracted with EtOAc (3 x 30 mL). The combined organic layers were washed with brine 30 mL, dried (Na<sub>2</sub>SO<sub>4</sub>), filtered, and the solvent was evaporated. Purification by flash column chromatography, elute with EtOAc-Hexane (1:9 to 1:1), gave 5-(4- hydroxyphenyl)furan-2-carbaldehyde (0.204 g, 1.08 mmol, 81%) as yellow solid; R<sub>f</sub> 0.26 [EtOAc-Hexane (3:7)]; m.p. 176–178 °C (decompose) lit<sup>4</sup> m.p. 178–180 °C; <sup>1</sup>H NMR (300 MHz, (CD<sub>3</sub>)<sub>2</sub>CO) δ 9.62 (s, 1H), 8.91 (s, 1H), 7.79–7.76 (m, 2H), 7.51 (d, J = 3.7 Hz, 1H), 7.00–6.97 (m, 3H) Data were in agreement to those reported in the reterature.<sup>8</sup> Compound below was synthesized following the procedure described here.

### 5-(4-hydroxyphenyl)thiophene-2-carbaldehyde

Yellow solid (0.306 g, 1.50 mmol, 81%); ; R<sub>f</sub> 0.29 [EtOAc-Hexane (3:7)]; m.p. 212–214 °C (decompose) lit<sup>9</sup> m.p. 210–212 (decompose) °C; <sup>1</sup>H NMR (300 MHz, (CD<sub>3</sub>)<sub>2</sub>SO) δ 10.00 (s, 1H), 9.86 (s, 1H), 7.99 (d, J = 4.0 Hz, 1H), 7.66 (d, J = 8.7 Hz, 2H), 7.56 (d, J = 4.0 Hz, 1H), 6.88 (d, J = 8.7 Hz, 2H) Data were in agreement to those reported in the literature.<sup>9</sup>

### References

1. A. J. Floyd, R. G. Kinsman, Y. Roshan-Ali, D. W. Brown, *Tetrahedron*, 1983, **39**, 3881–3885.
2. Y. Bao, J.-Y. Wang, Y.-X. Zhang, Y. Li, X.-S. Wang, *Tetrahedron Lett.*, 2018, **59**, 3147–3150.
3. A. Faouzi, A. Arnaud, A. Bancet, C. Barette, J. Preto, C. V. Do, L. P. Jordheim, Z. Bousfiha, T. T. B. Nguyen, M. Berrière, A. Farce, M.-O. Fauvarque, R. Barret, T. Lomberget, *Eur. J. Med. Chem.*, 2021, **215**, 113275.
4. T. Hosoya, H. Aoyama, T. Ikemoto, Y. Kihara, T. Hiramatsu, M. Endo, M. Suzuki, *Bioorg. Med. Chem.*, 2003, **11**, 663–673.
5. S. Aslam, N. Asif, M. N. Khan, M. A. Khan, M. A. Munawar, M. Nasrullah, *Asian J. Chem.*, 2013, **25**, 7738–7742.
6. W. Hanefeld, M. Schlitzer, *J. Heterocycl. Chem.*, 1995, **32**, 1019–1025.
7. L. Racane, V. Tralić-Kulenović, G. Karminski-Zamola, L. Fišer-Jakić, *Monatsh. Chem.*, 1995, **126**, 1375–1381.
8. M. D. Moya-Garzón, C. M. Higuera, P. Peñalver, M. Romera, M. X. Fernandes, F. Franco-Montalbán, J. A. Gómez-Vidal, E. Salido, M. Díaz-Gavilán, *J. Med. Chem.*, 2018, **61**, 7144–7167.
9. P. Guo, A. Paul, A. Kumar, N. K. Harika, S. Wang, A. A. Farahat, D. W. Boykin, W. D. Wilson, *Chem. Commun.*, 2017, **53**, 10406–10409.

# 1H and 13C spectra

## 5-formylfuran-2-carbonitrile spectra in CDCl<sub>3</sub>

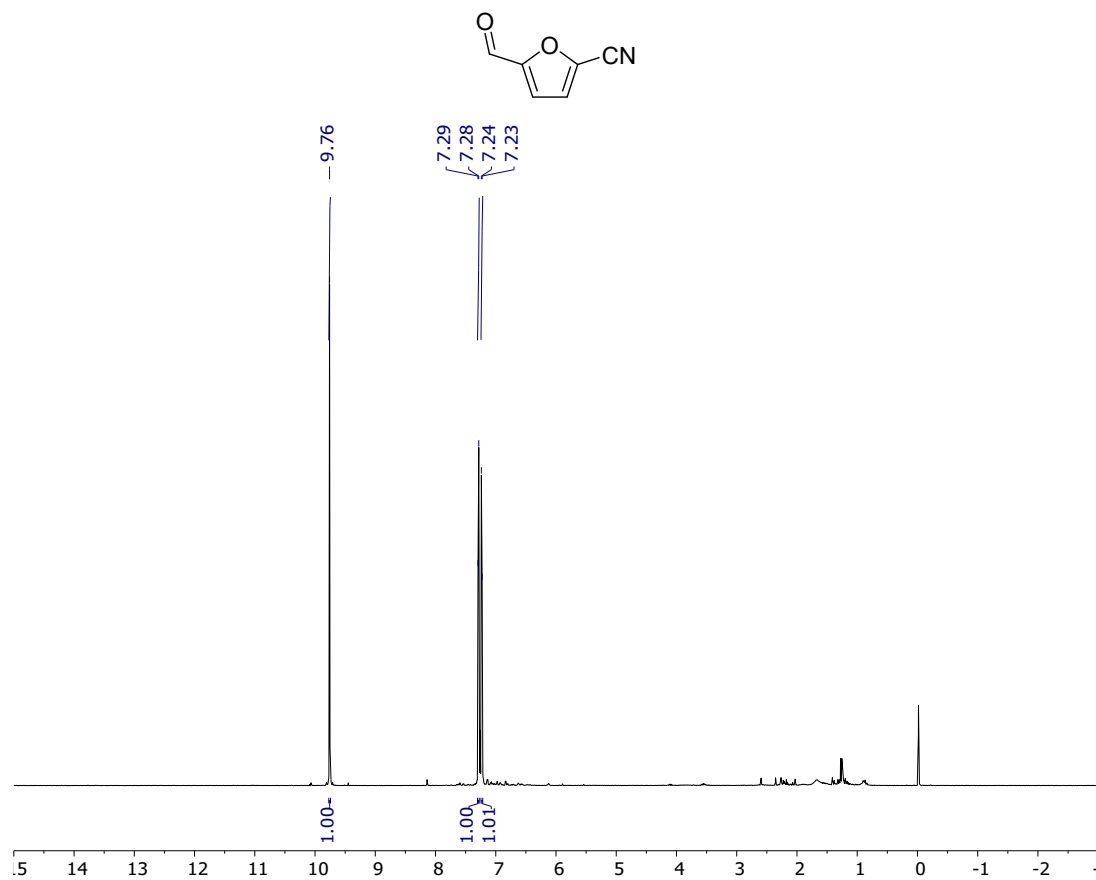

# 5-methoxythiophene-2-carbaldehyde spectra in CDCl<sub>3</sub>

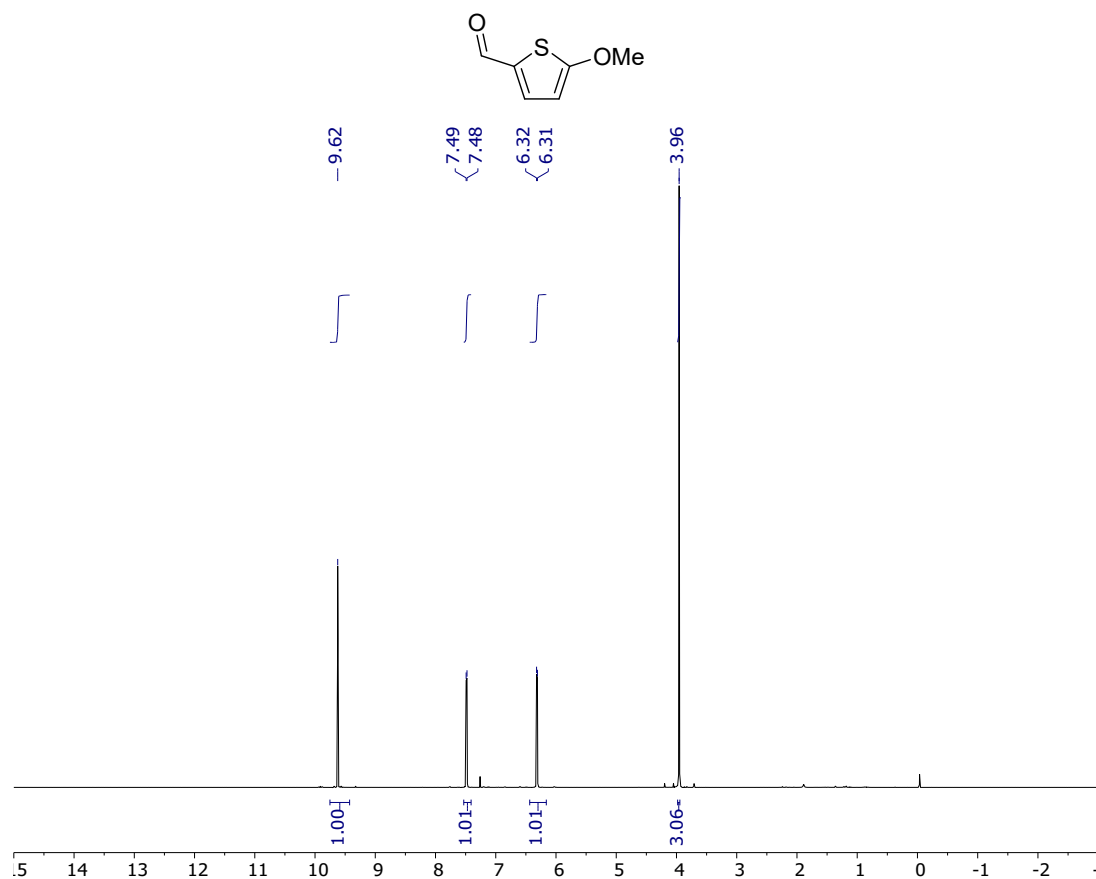

# 4-methoxythiophene-2-carbaldehyde spectra in CDCl<sub>3</sub>

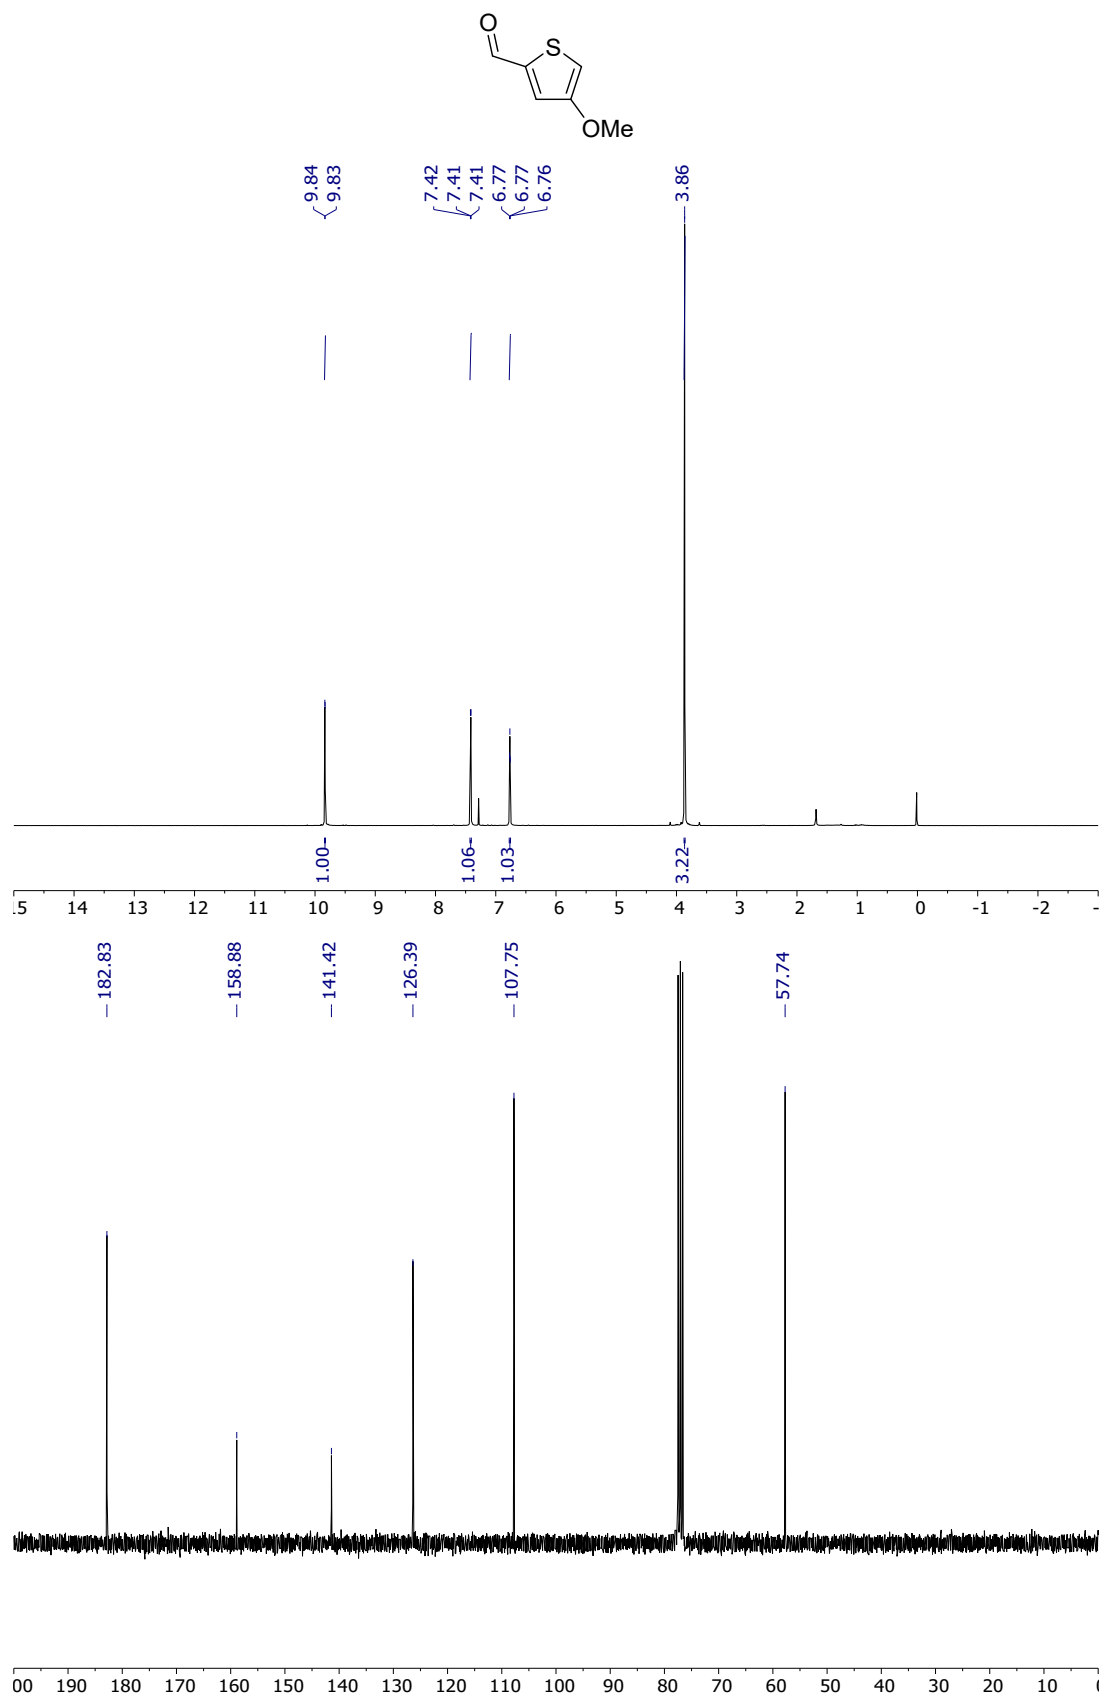

### 3-methoxythiophene-2-carbaldehyde spectra in CDCl<sub>3</sub>

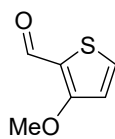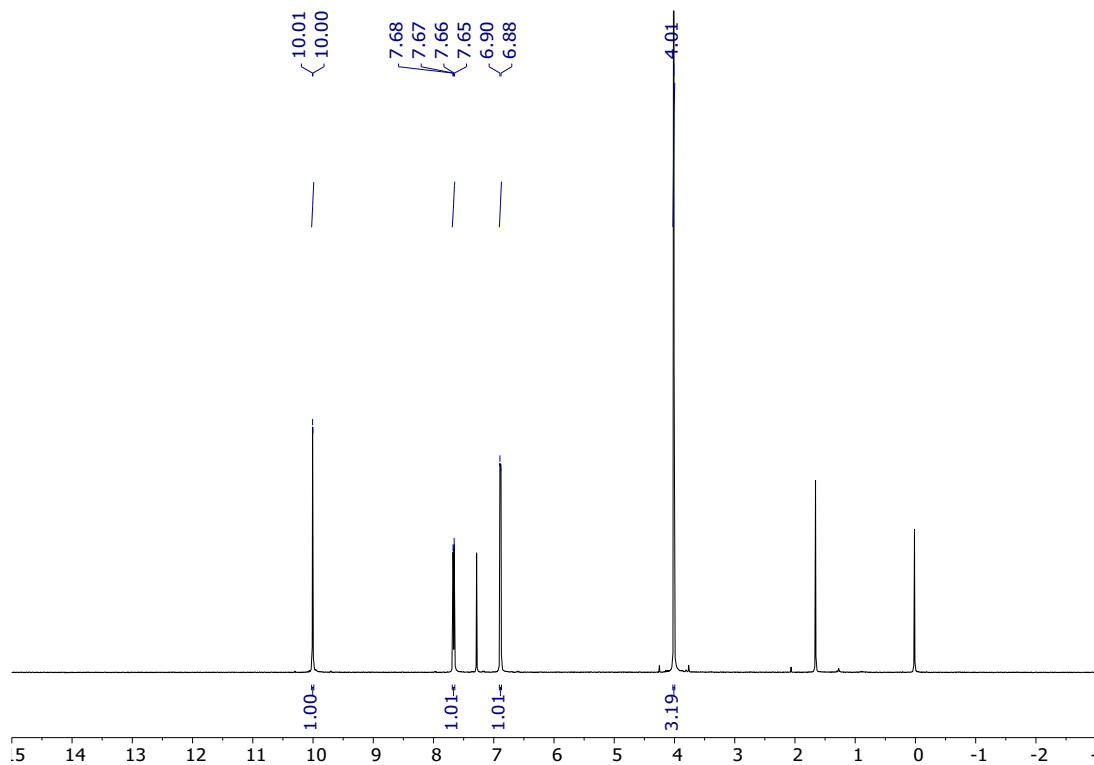

# 5-(3-nitrophenyl)furan-2-carbaldehyde spectra in CDCl<sub>3</sub>

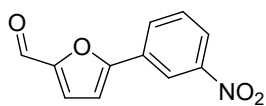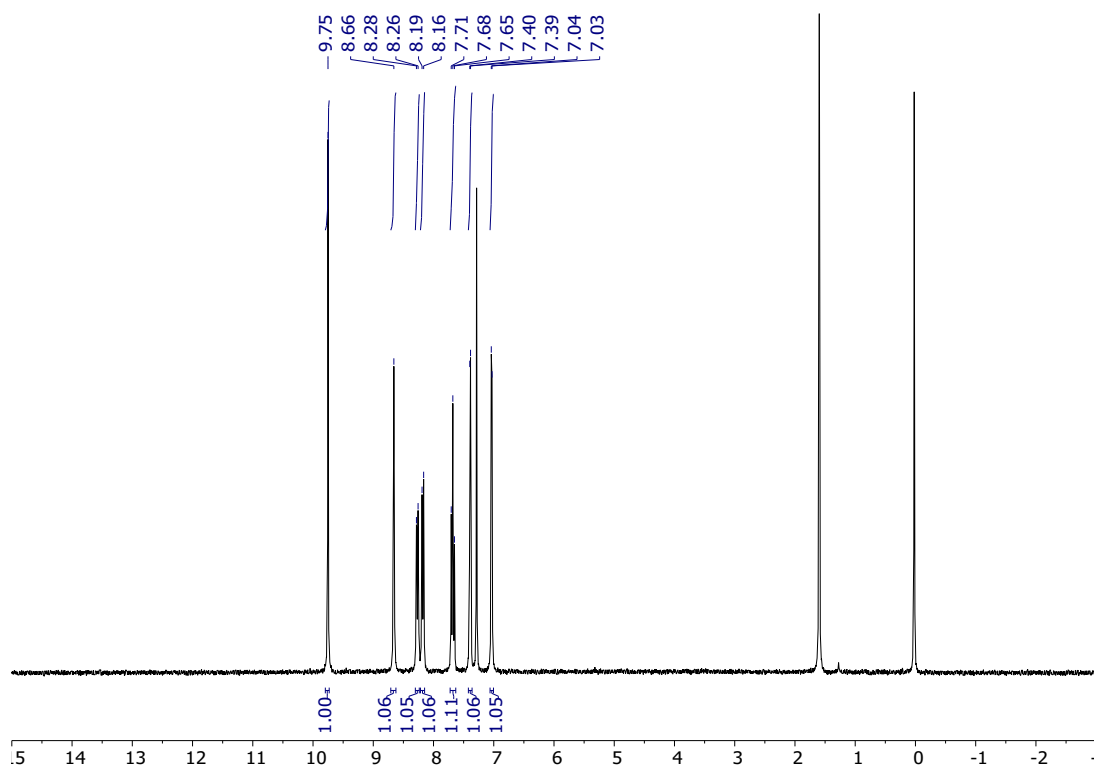



# 5-(3-methoxyphenyl)furan-2-carbaldehyde spectra in CDCl<sub>3</sub>

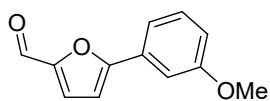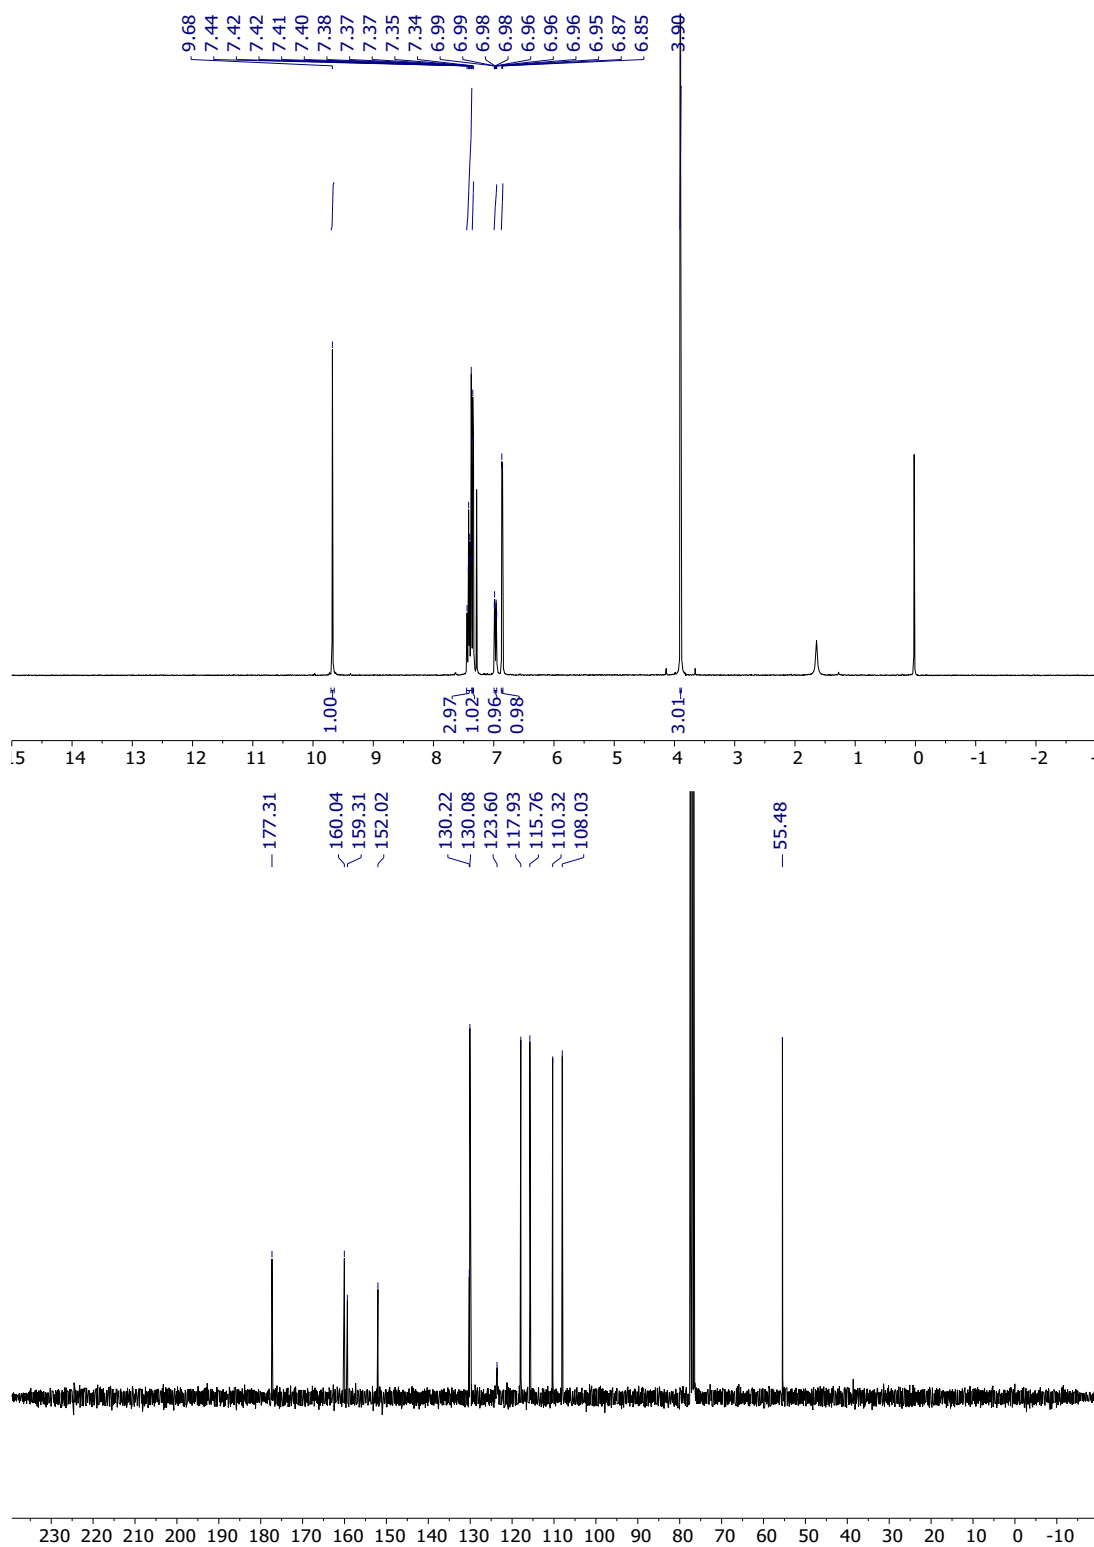

# 5-(3-nitrophenyl)thiophene-2-carbaldehyde spectra in CDCl<sub>3</sub>

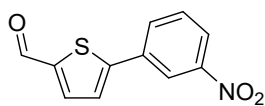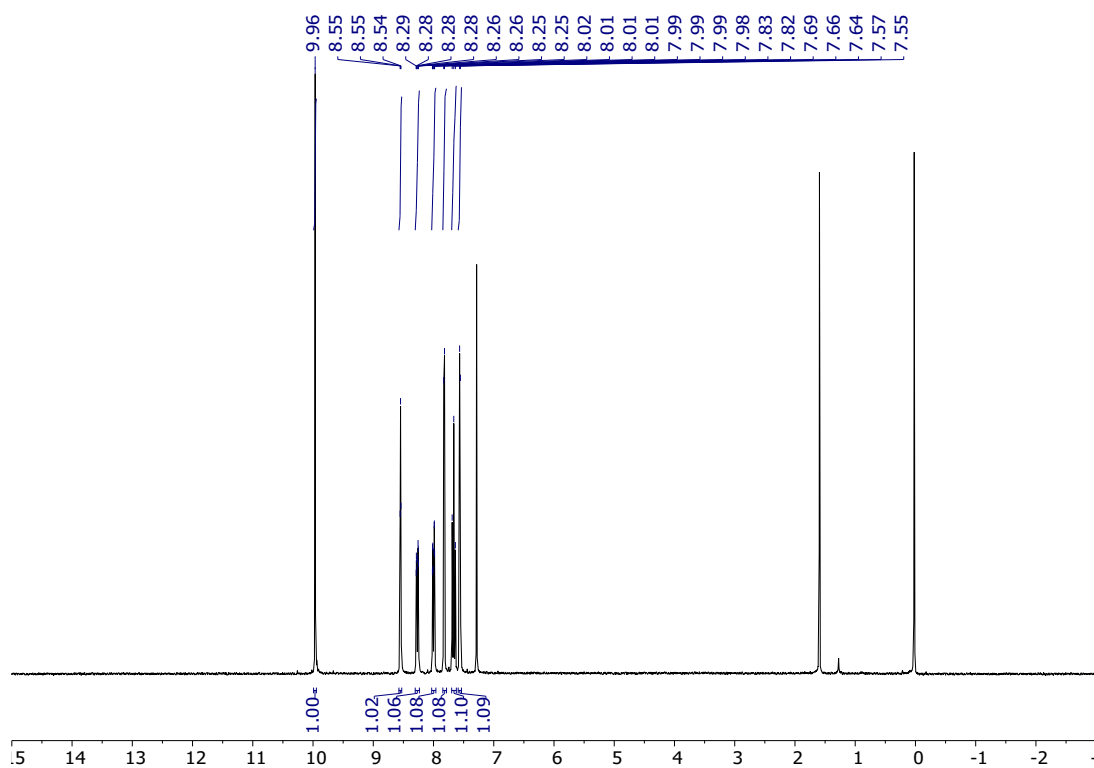

5-(3-methoxyphenyl)thiophene-2-carbaldehyde spectra in CDCl<sub>3</sub>

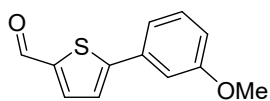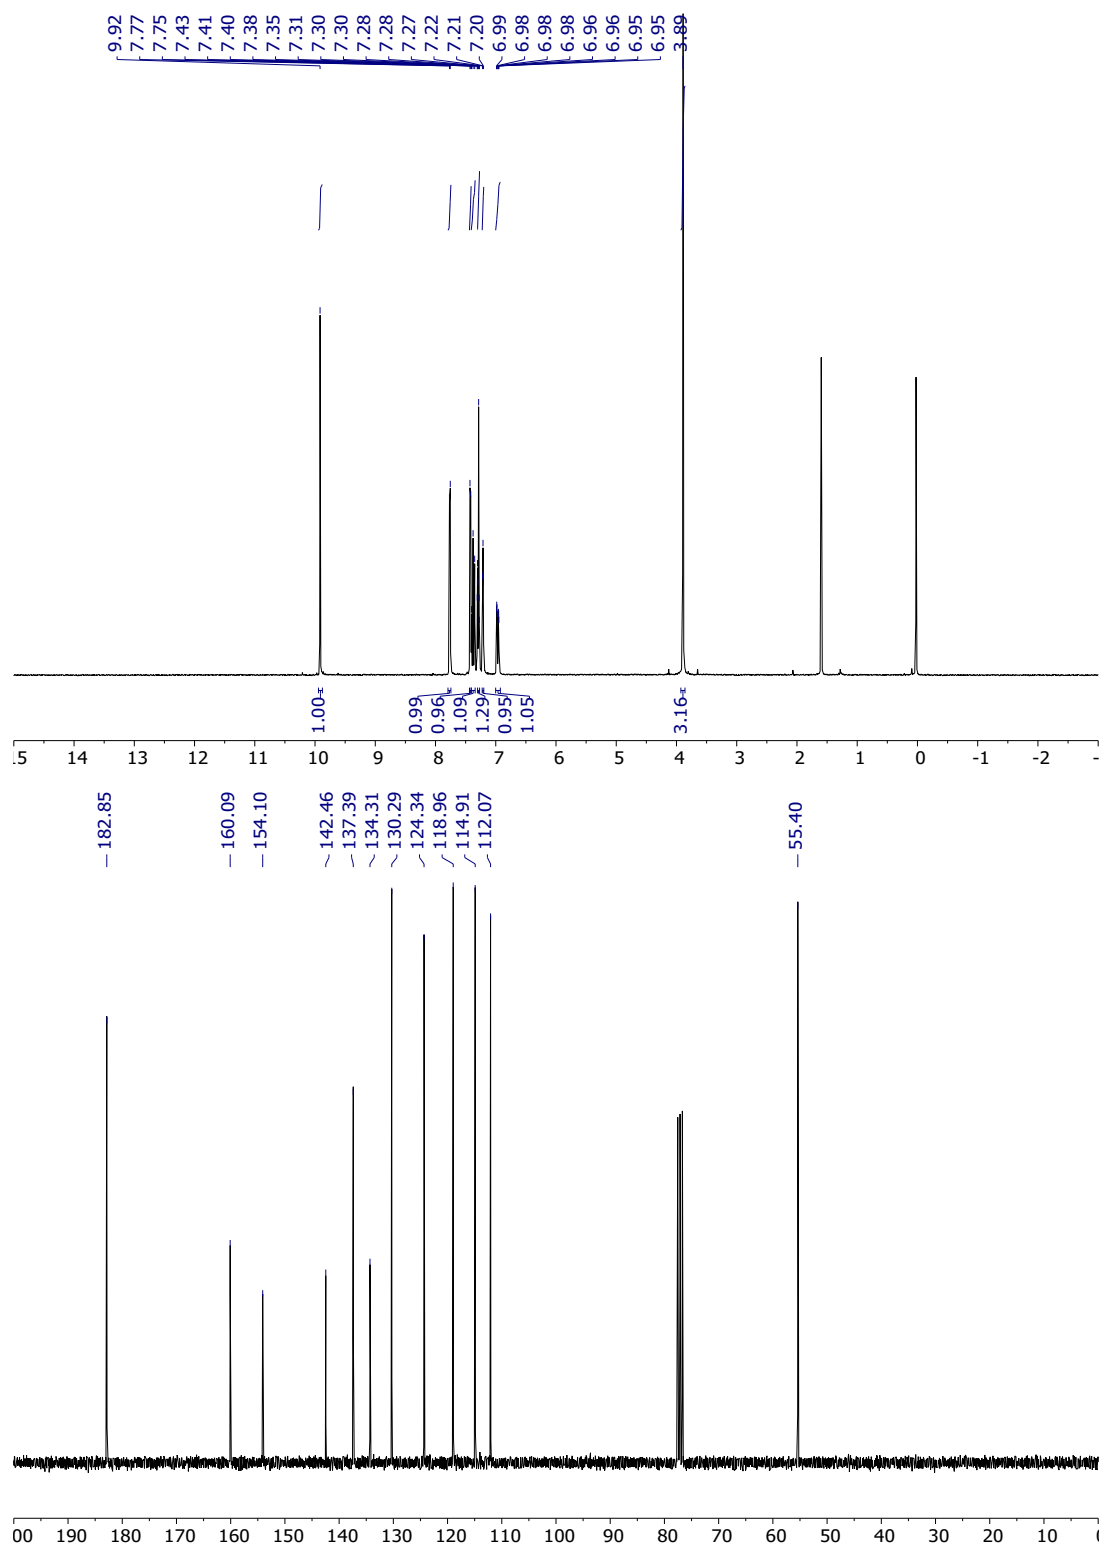

# 4-(5-formylfuran-2-yl)benzoic acid spectra in dms0-d<sub>6</sub>

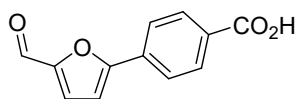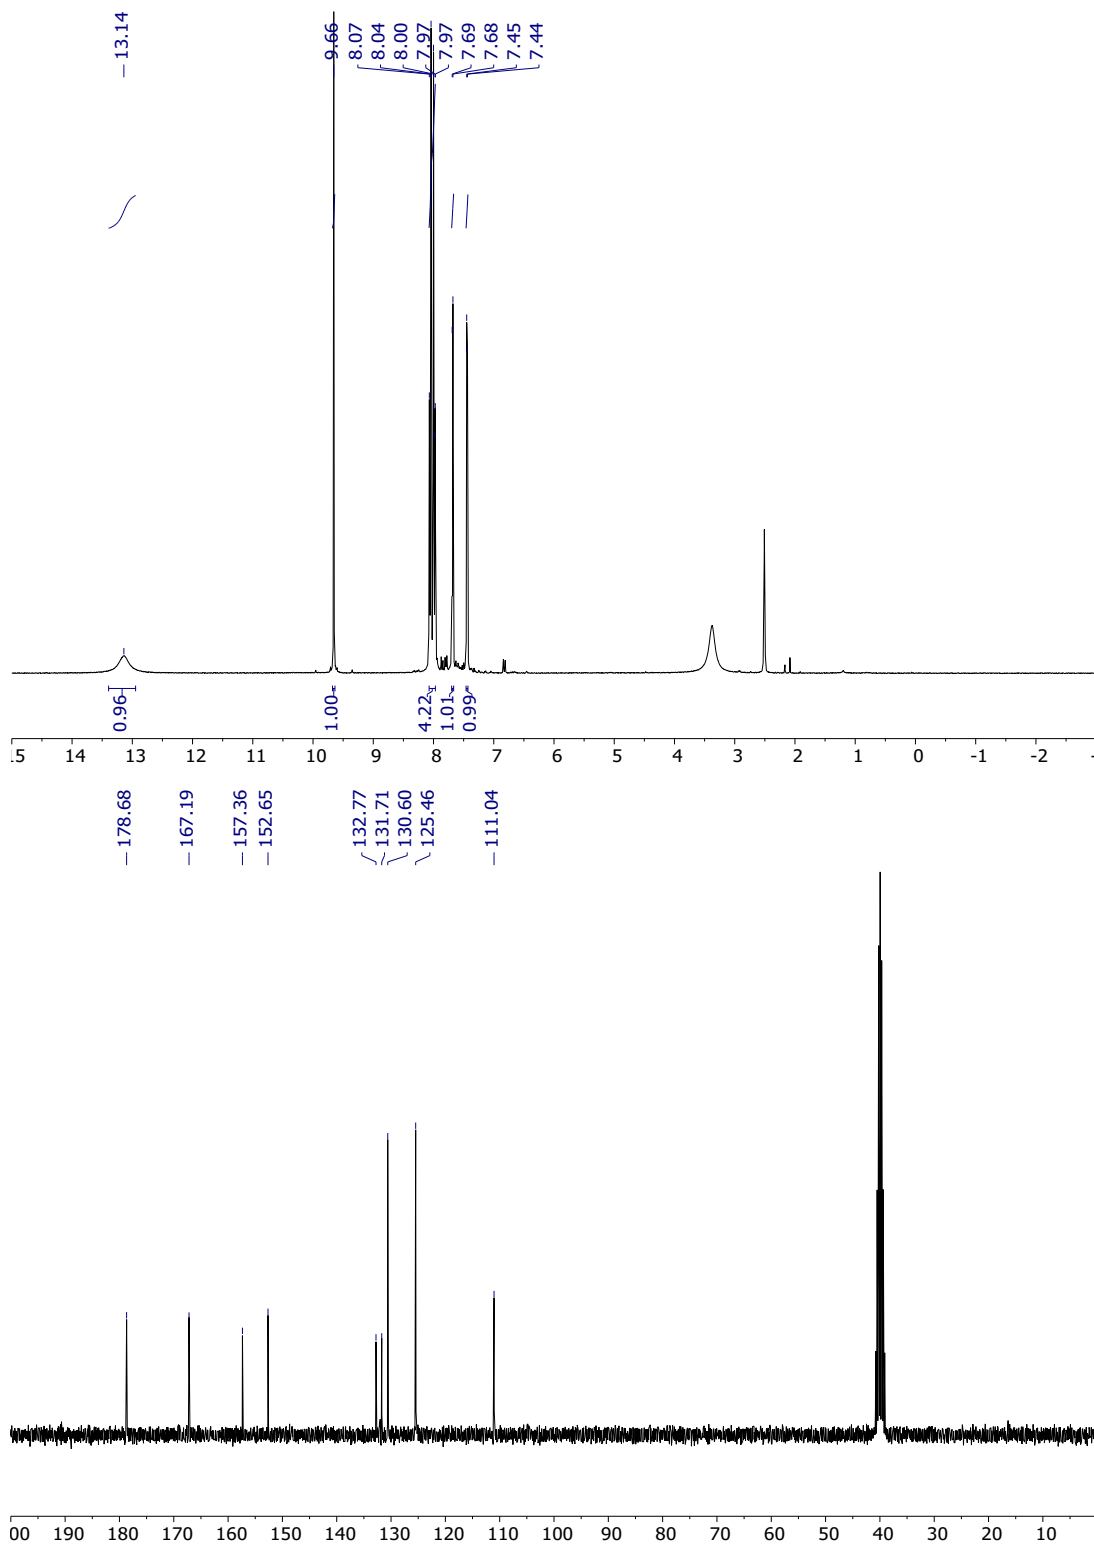

### 3-(5-formylfuran-2-yl)benzoic acid spectra in dms0-d<sub>6</sub>

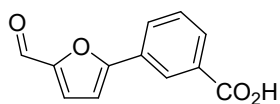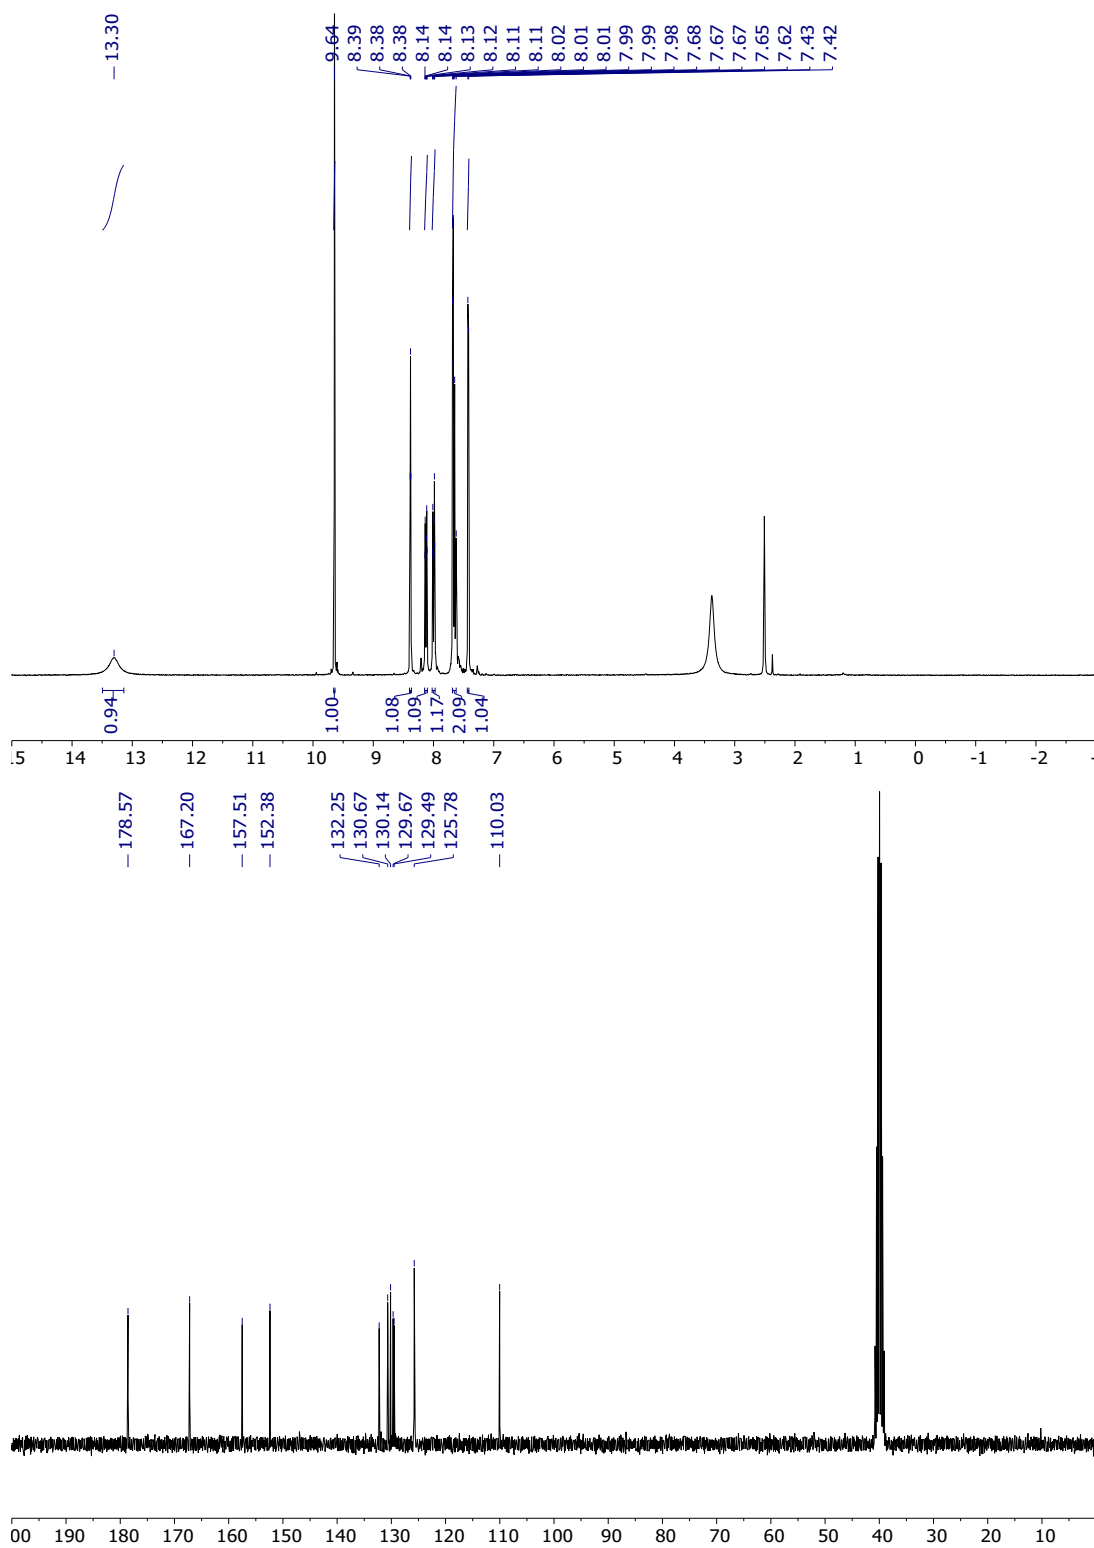

# 4-(5-formylthiophene-2-yl)benzoic acid spectra in dms0-d<sub>6</sub>

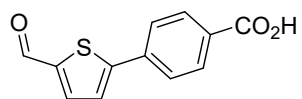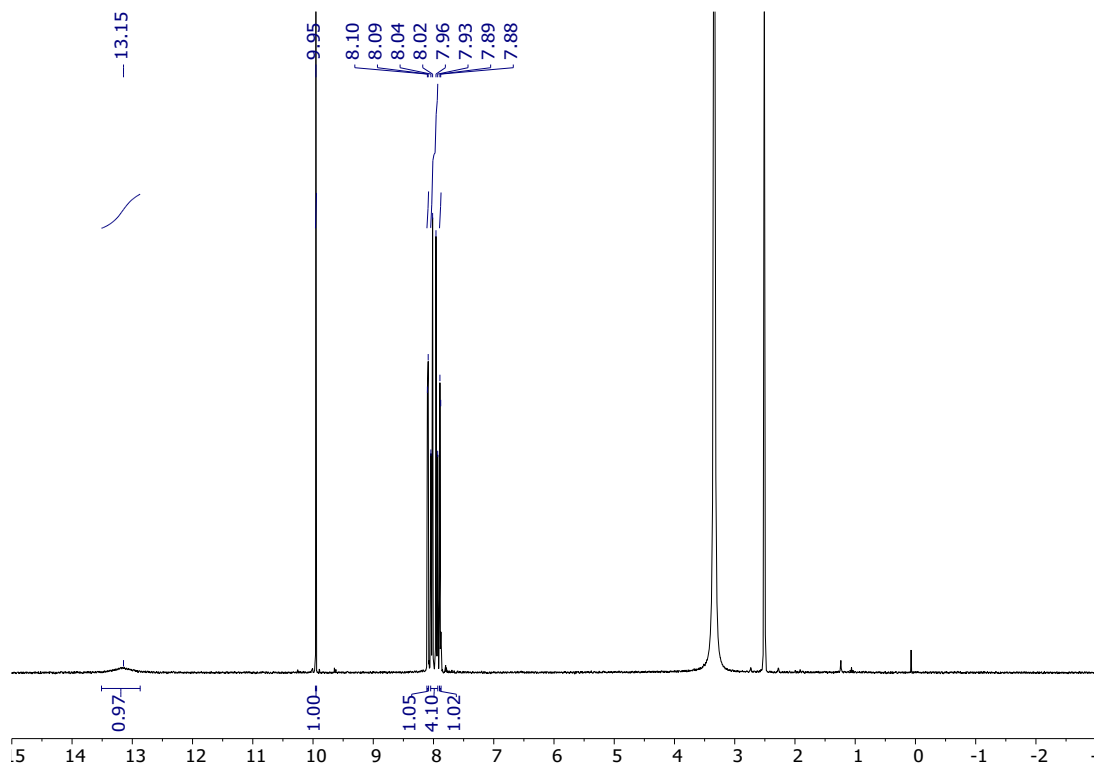

### 3-(5-formylthiophene-2-yl)benzoic acid spectra in dms0-d<sub>6</sub>

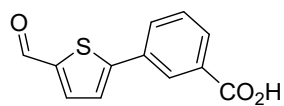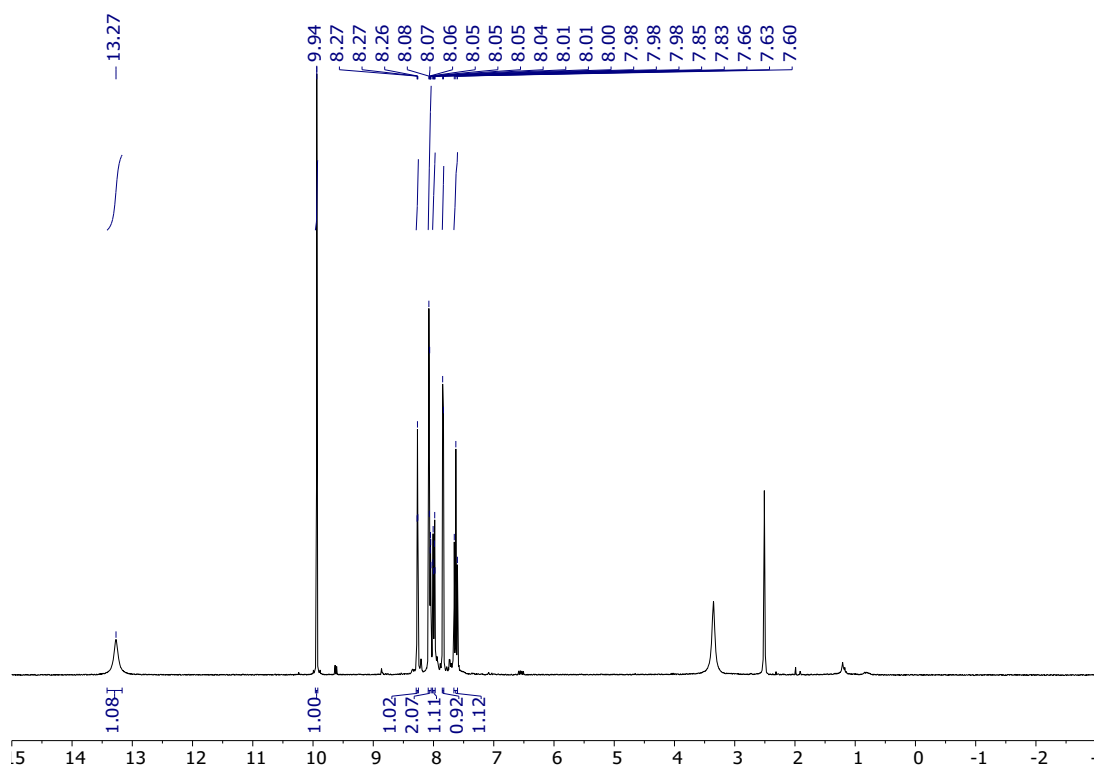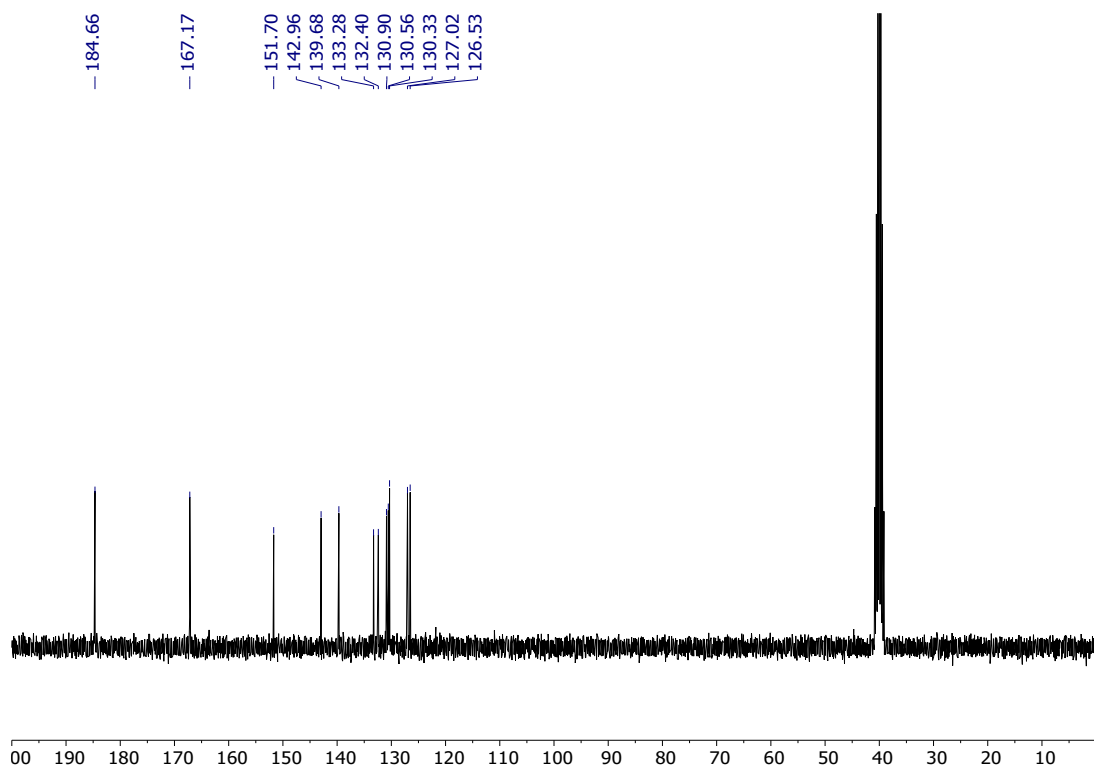

# 5-(4-hydroxyphenyl)furan-2-carbaldehyde spectra in acetone-d<sub>6</sub>

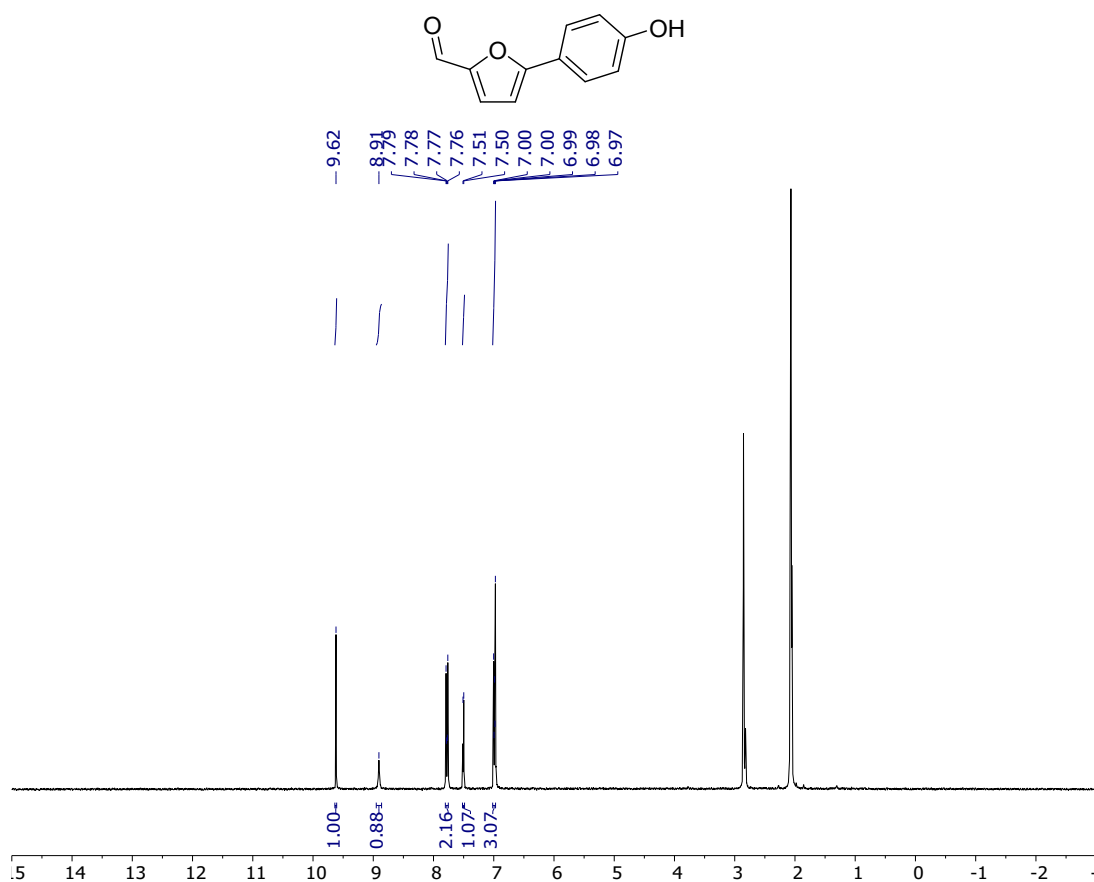



# 5-(4-hydroxyphenyl)thiophene-2-carbaldehyde spectra in dms0-d<sub>6</sub>

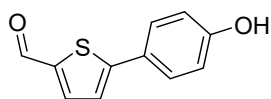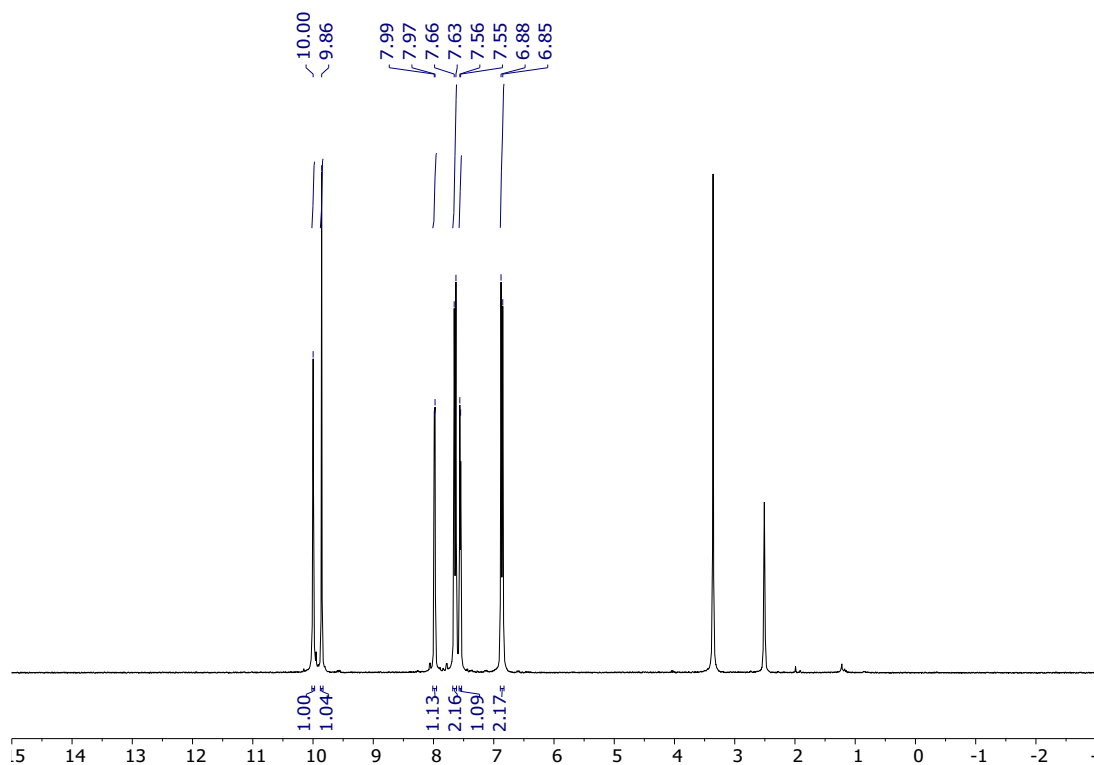

**(E)-5-bromo-N'-(5-cyanofuran-2-yl)methylene)-3-phenyl-1H-indole-2-carbohydrazide**  
**(5e) spectra in dms0-d<sub>6</sub>**

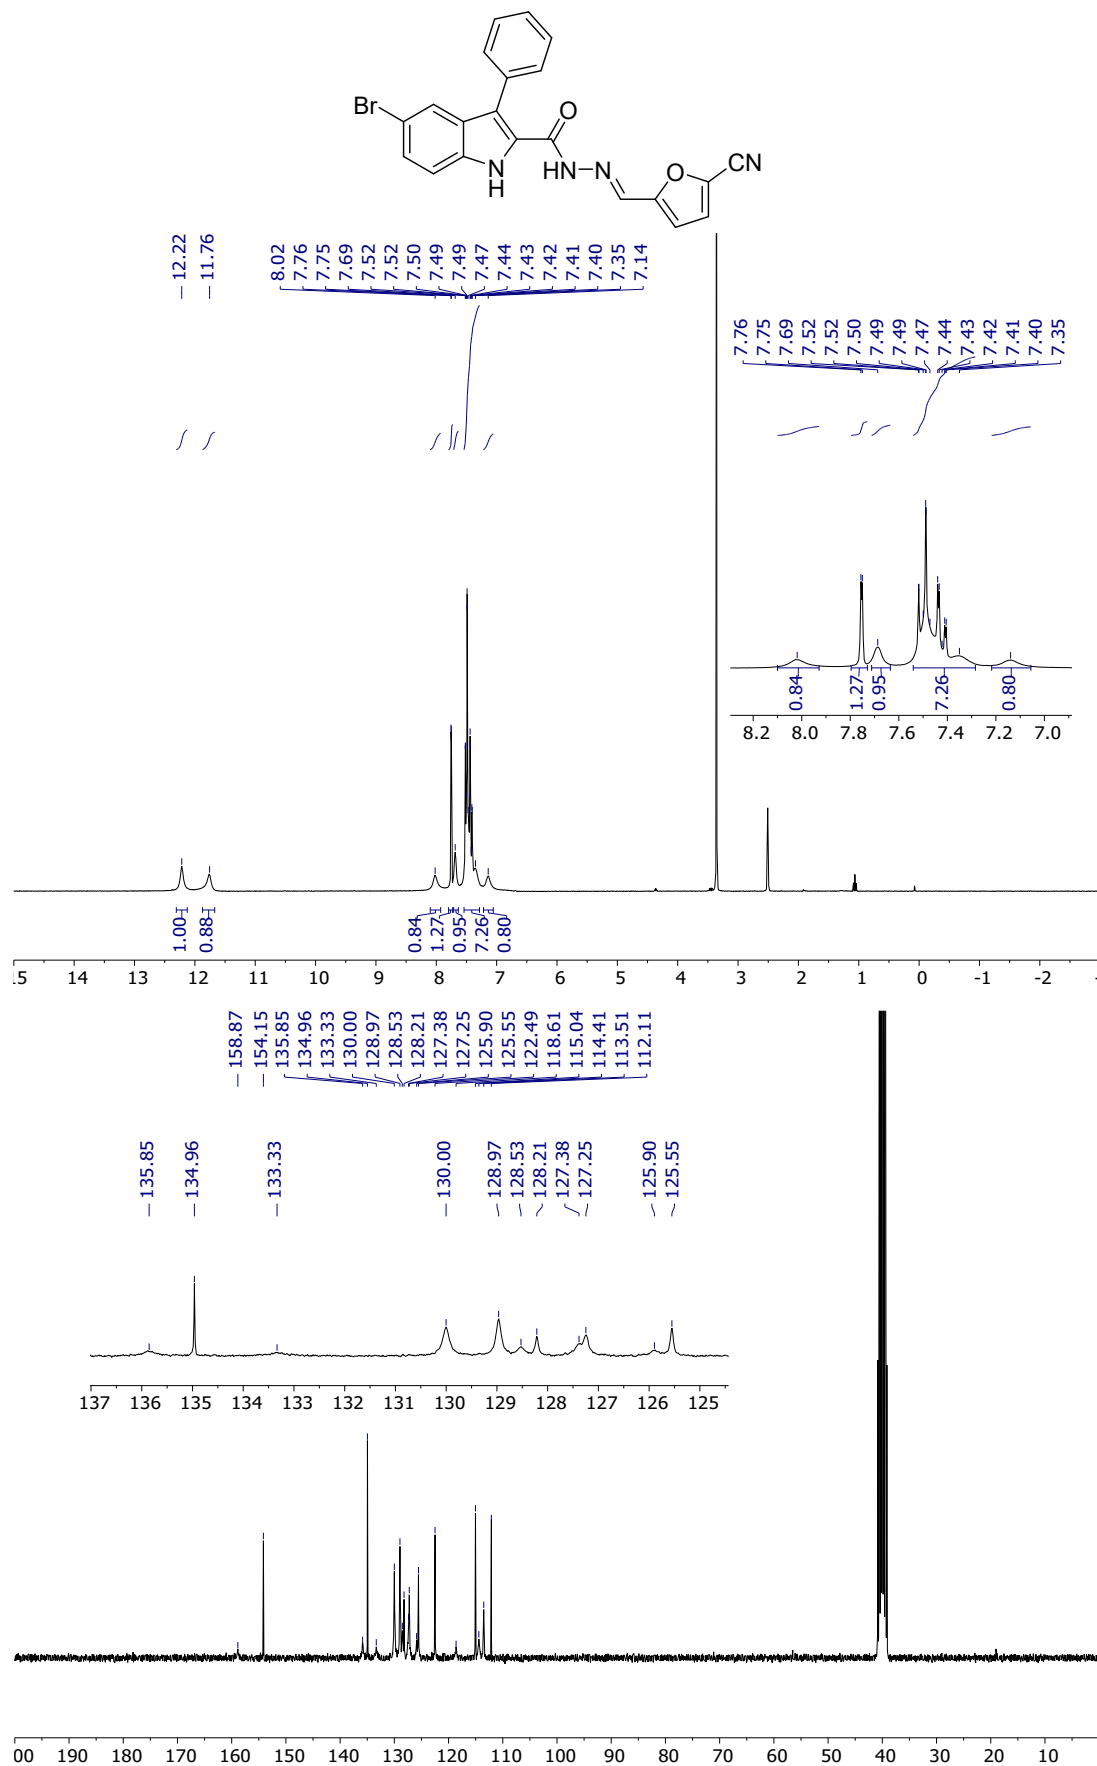

**(E)-5-bromo-*N'*-((5-nitrofuran-2-yl)methylene)-3-phenyl-1*H*-indole-2-carbohydrazide (5f) spectra in dms0-d<sub>6</sub>**

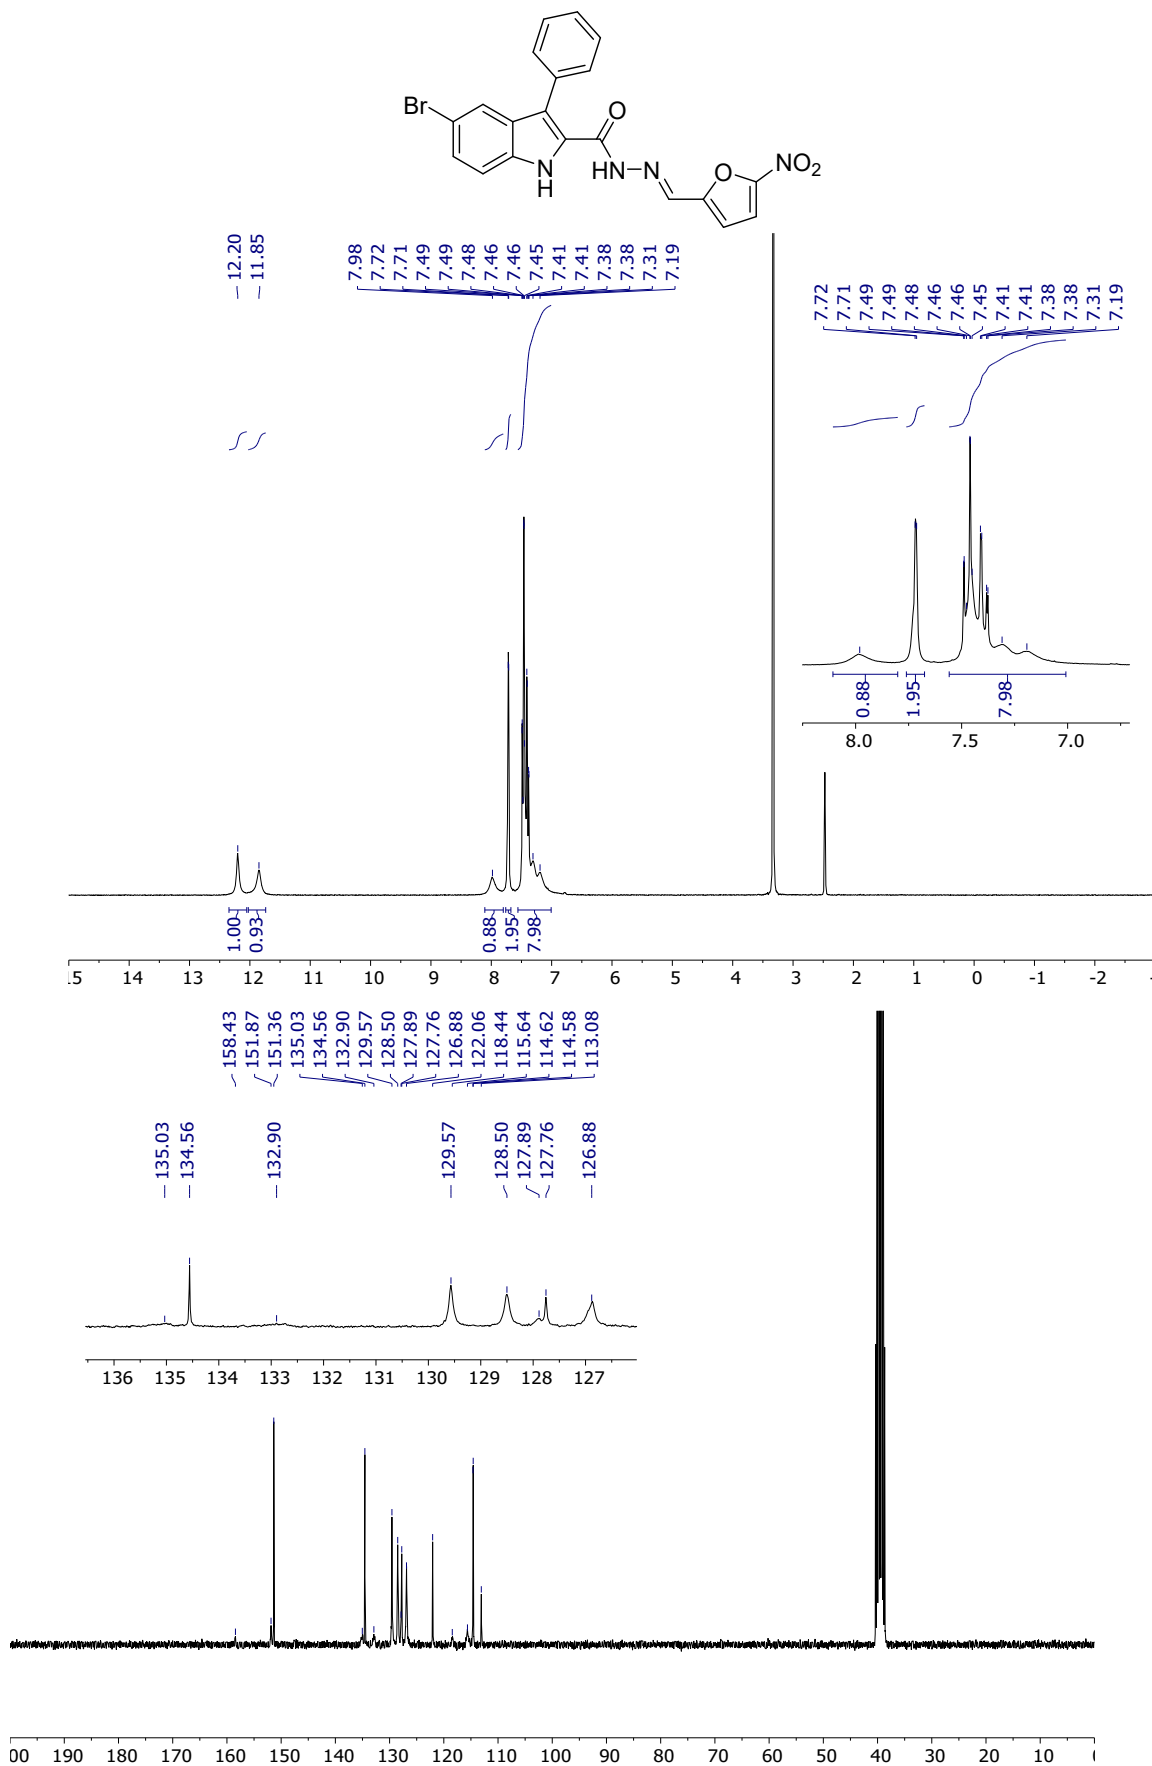

**(E)-5-bromo-N'-((5-(3-nitrophenyl)furan-2-yl)methylene)-3-phenyl-1H-indole-2-carbohydrazide (5g) spectra in dmsd<sub>6</sub>**

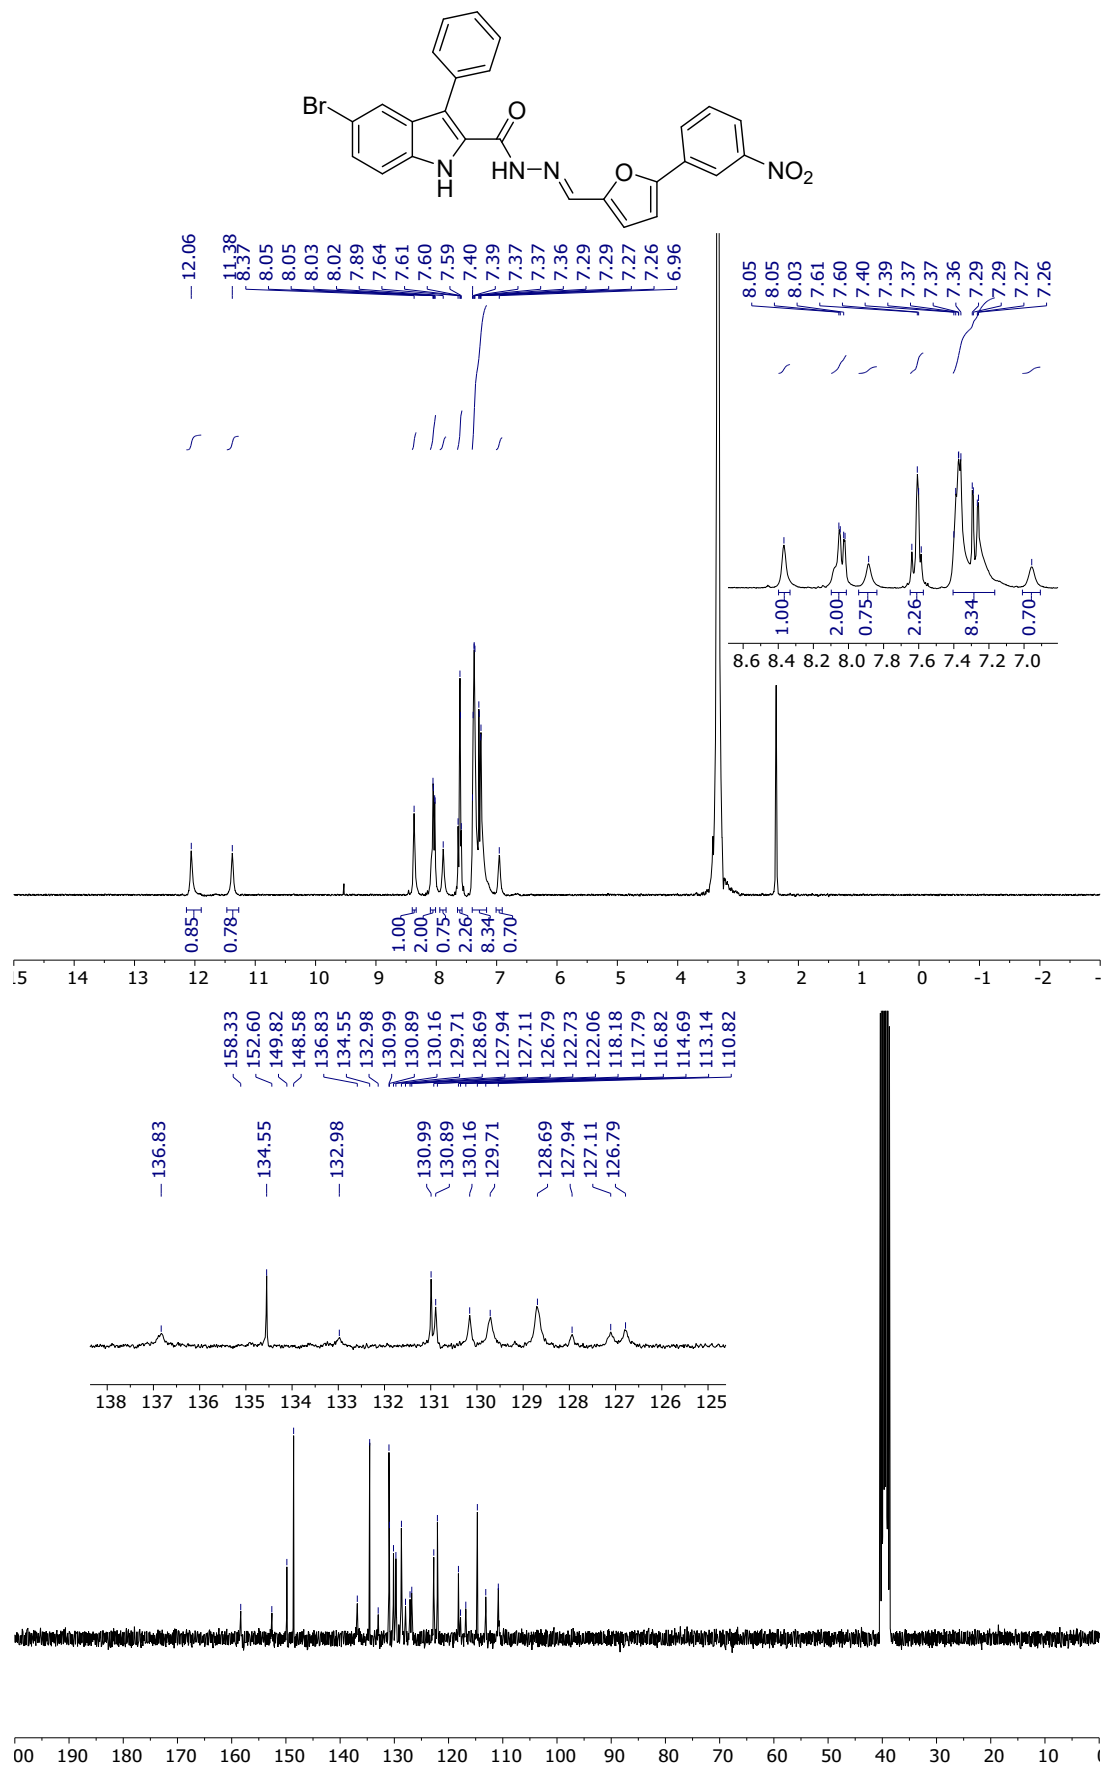

**(E)-5-bromo-N'-((5-(3-methoxyphenyl)furan-2-yl)methylene)-3-phenyl-1H-indole-2-carbohydrazide (5h) spectra in dms0-d<sub>6</sub>**

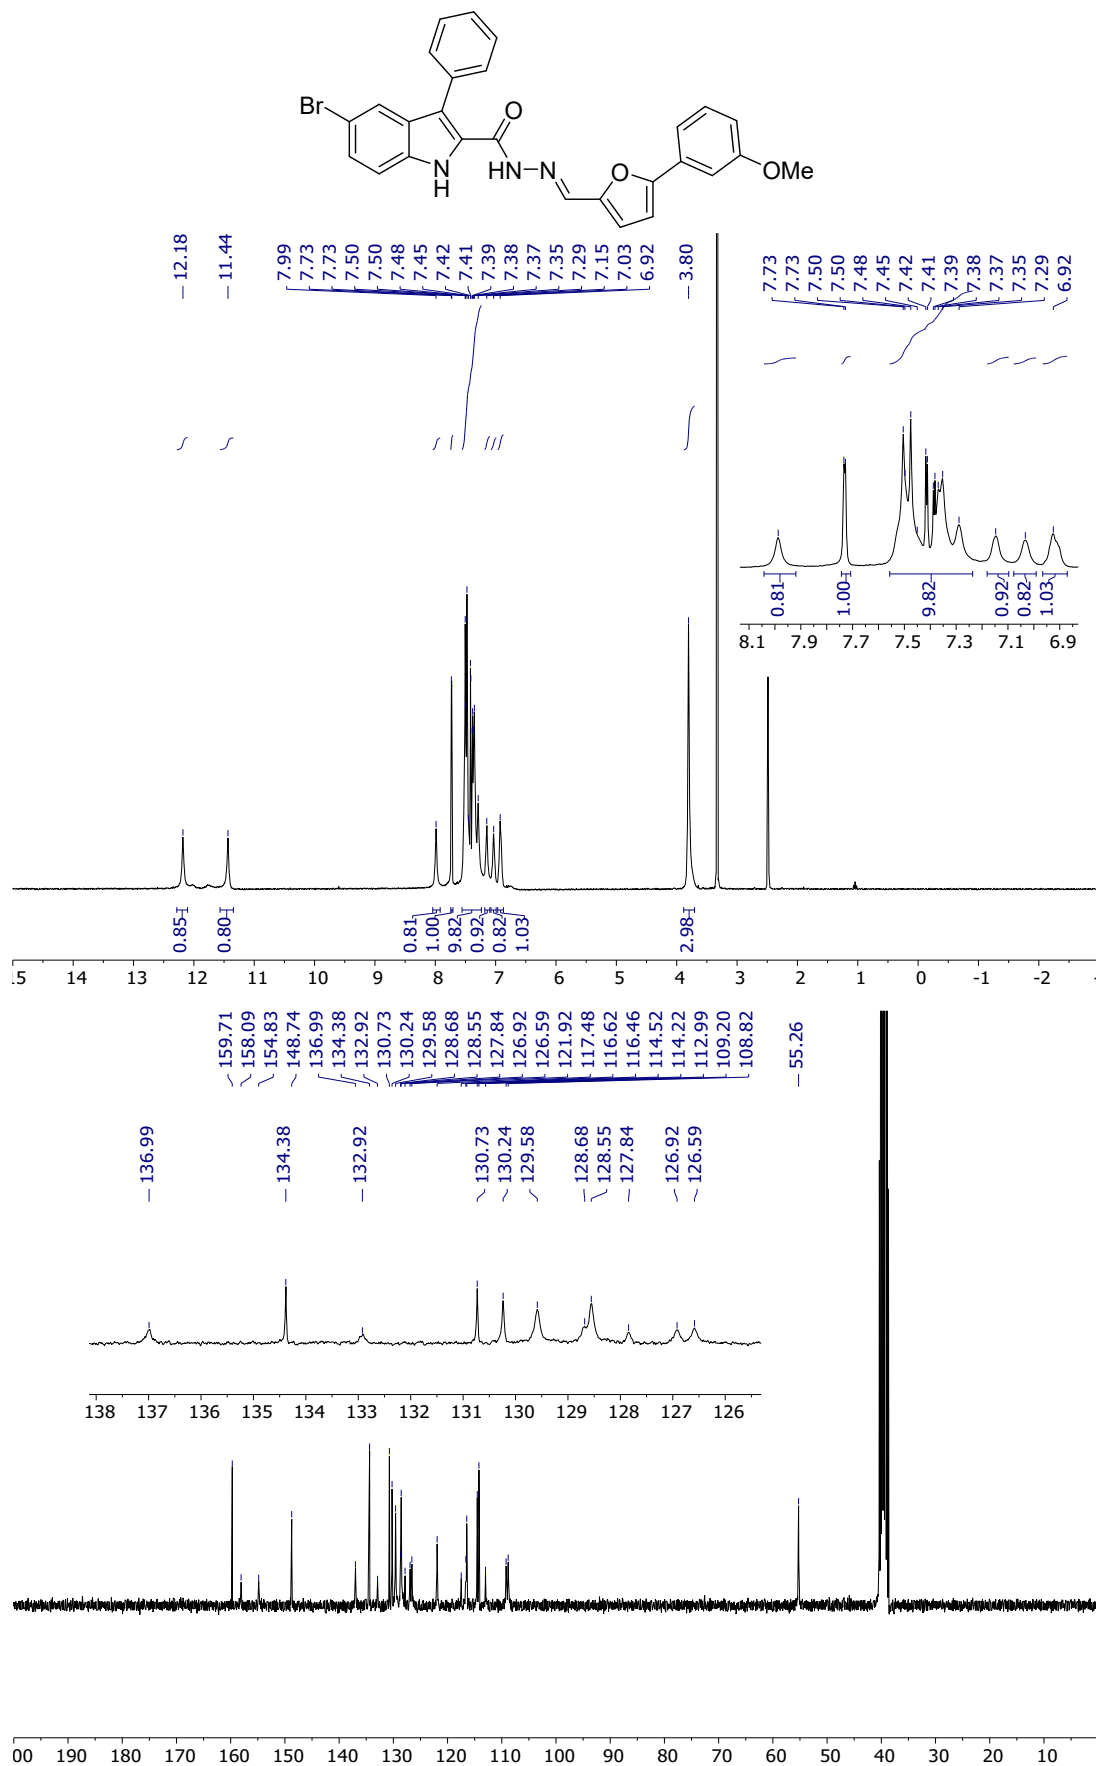

**(E)-4-(5-((2-(5-bromo-3-phenyl-1H-indole-2-carbonyl)hydrazono)methyl)furan-2-yl)benzoic acid (5i) spectra in dms0-d<sub>6</sub>**

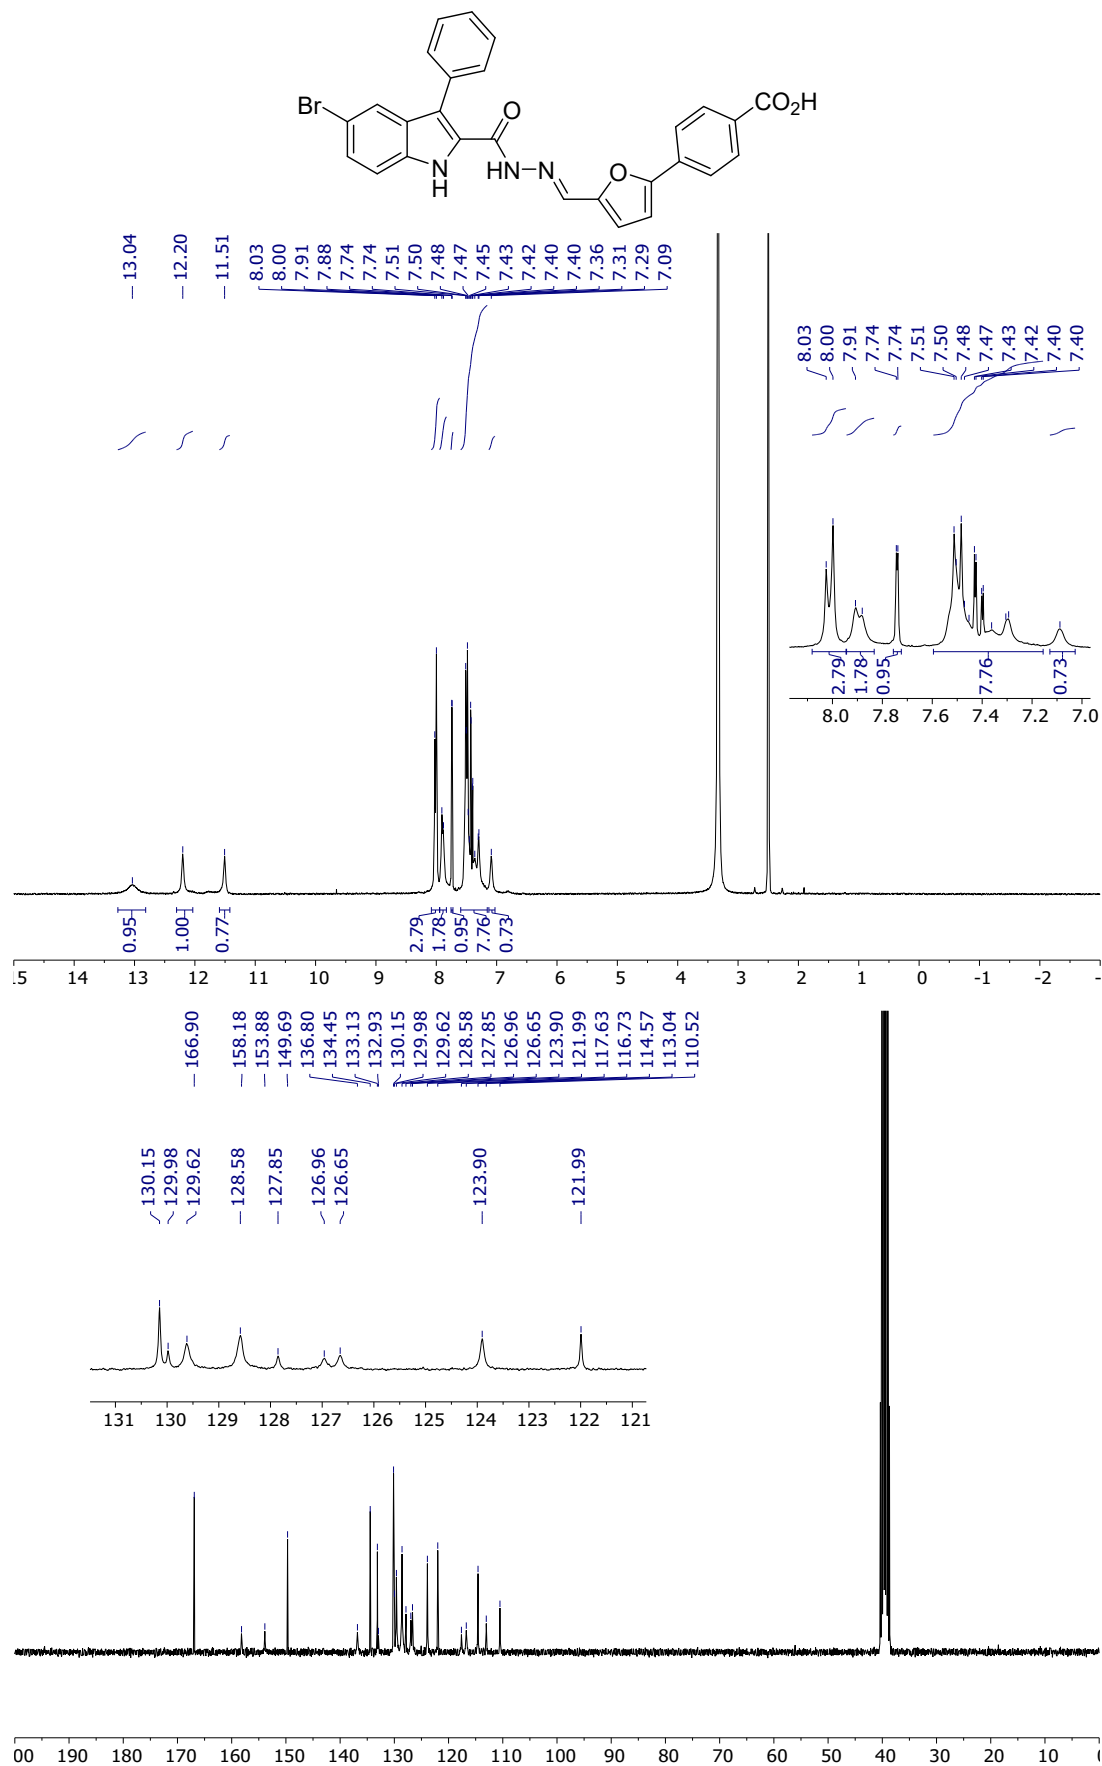

**(E)-3-(5-((2-(5-bromo-3-phenyl-1H-indole-2-carbonyl)hydrazono)methyl)furan-2-yl)benzoic acid (5j) spectra in dms0-d<sub>6</sub>**

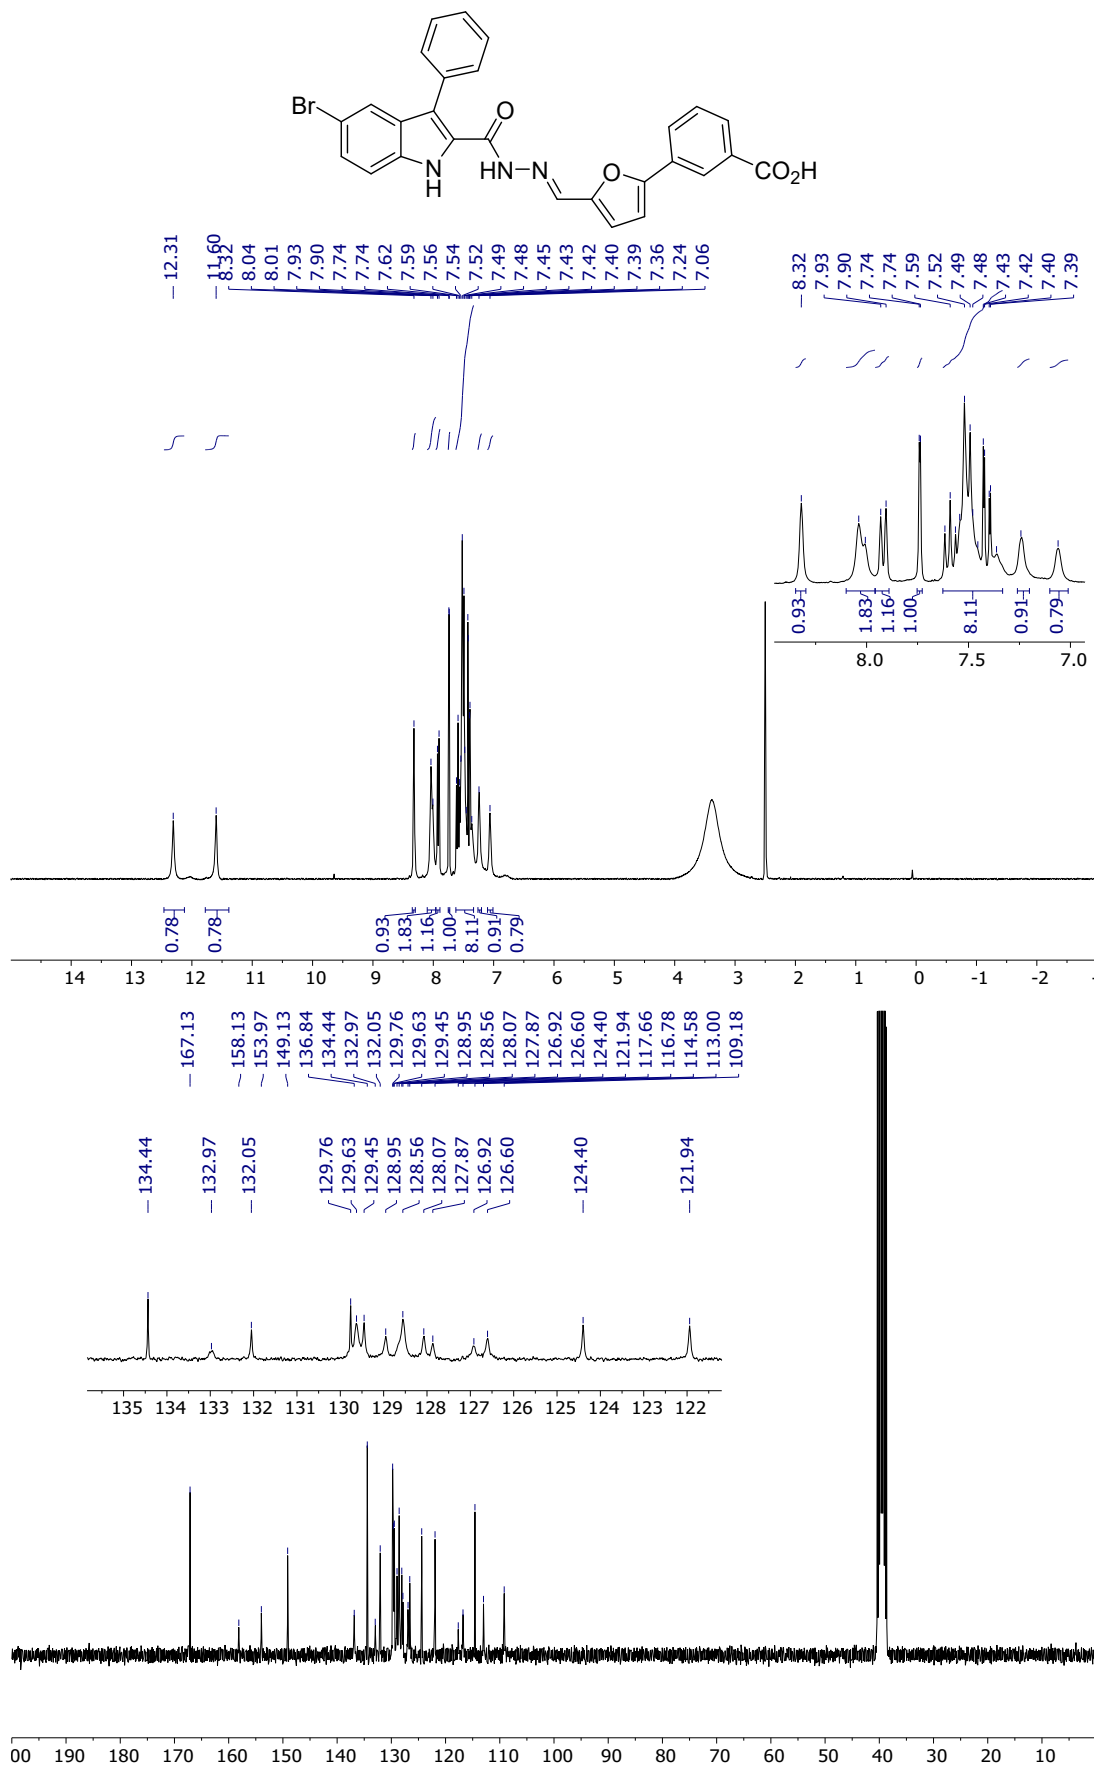

**(E)-5-bromo-N'-((5-(4-hydroxyphenyl)furan-2-yl)methylene)-3-phenyl-1H-indole-2-carbohydrazide (5k) spectra in dms0-d<sub>6</sub>**

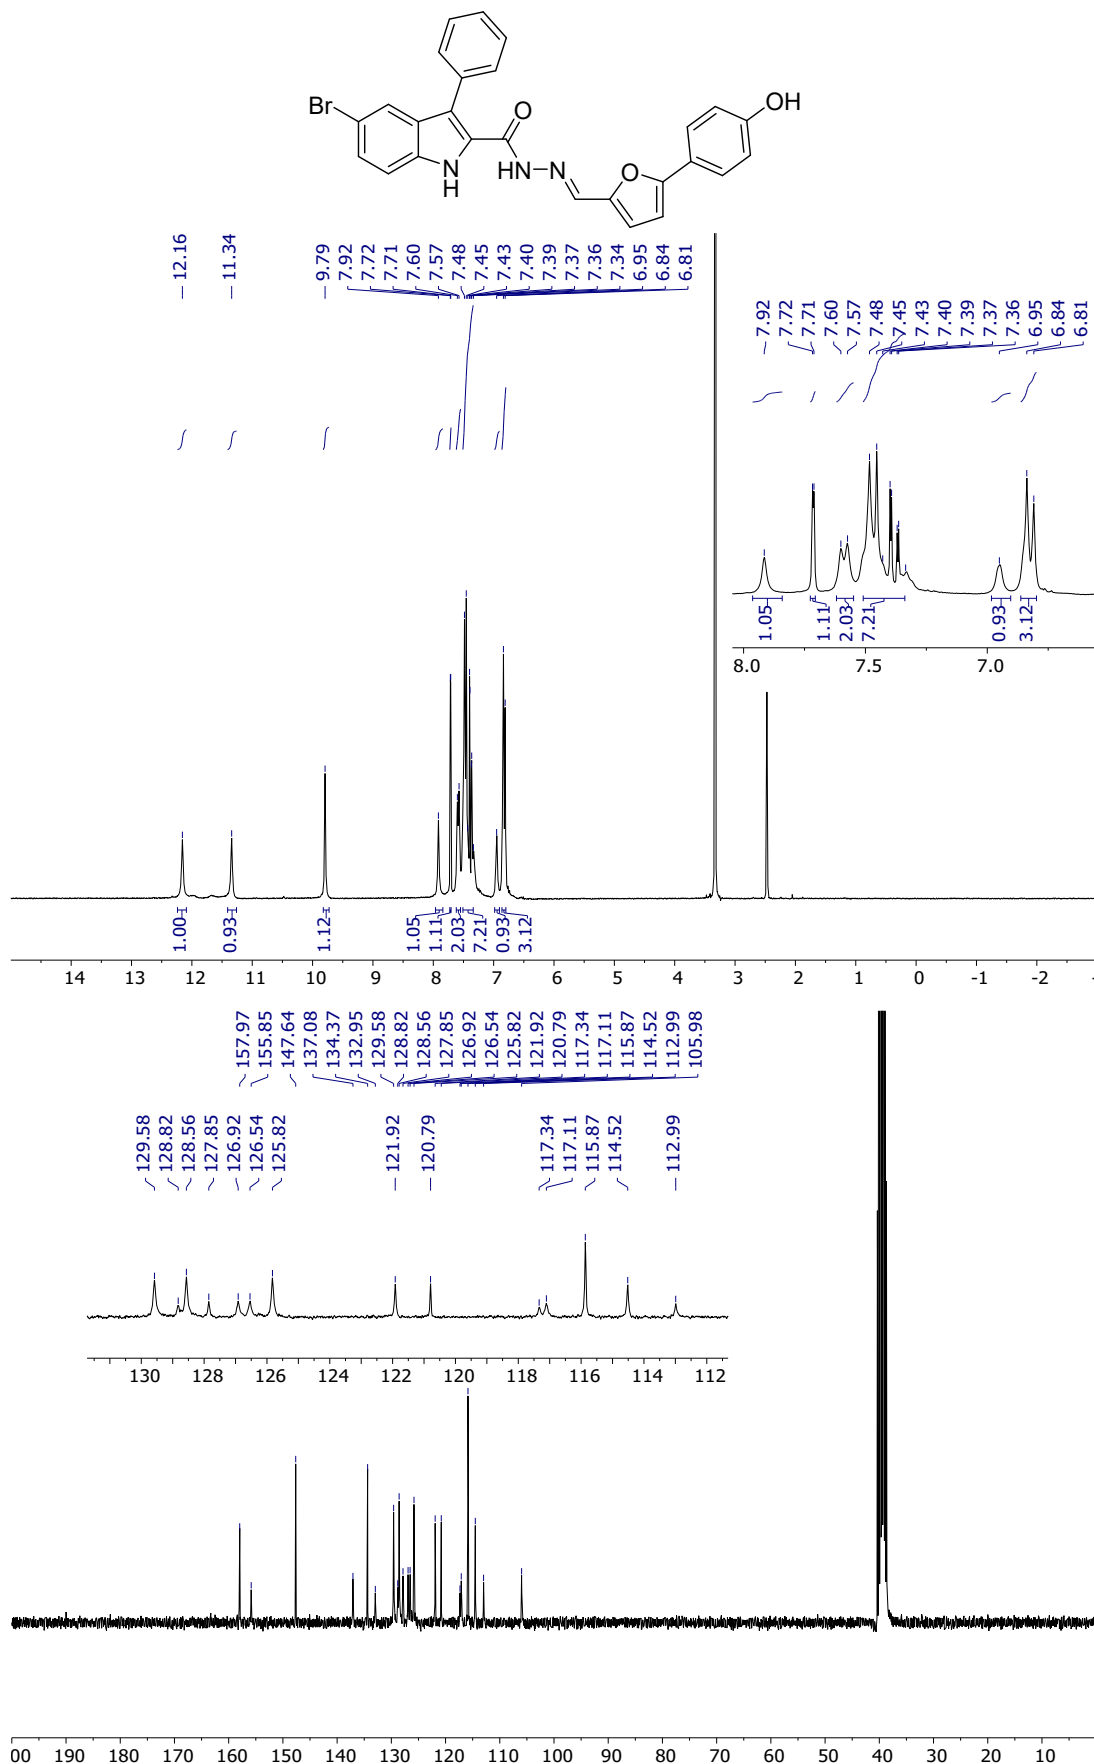



**(E)-5-bromo-3-phenyl-N'-(thiophene-2-ylmethylene)-1H-indole-2-carbohydrazide (6a)**  
spectra in dms0-d<sub>6</sub>

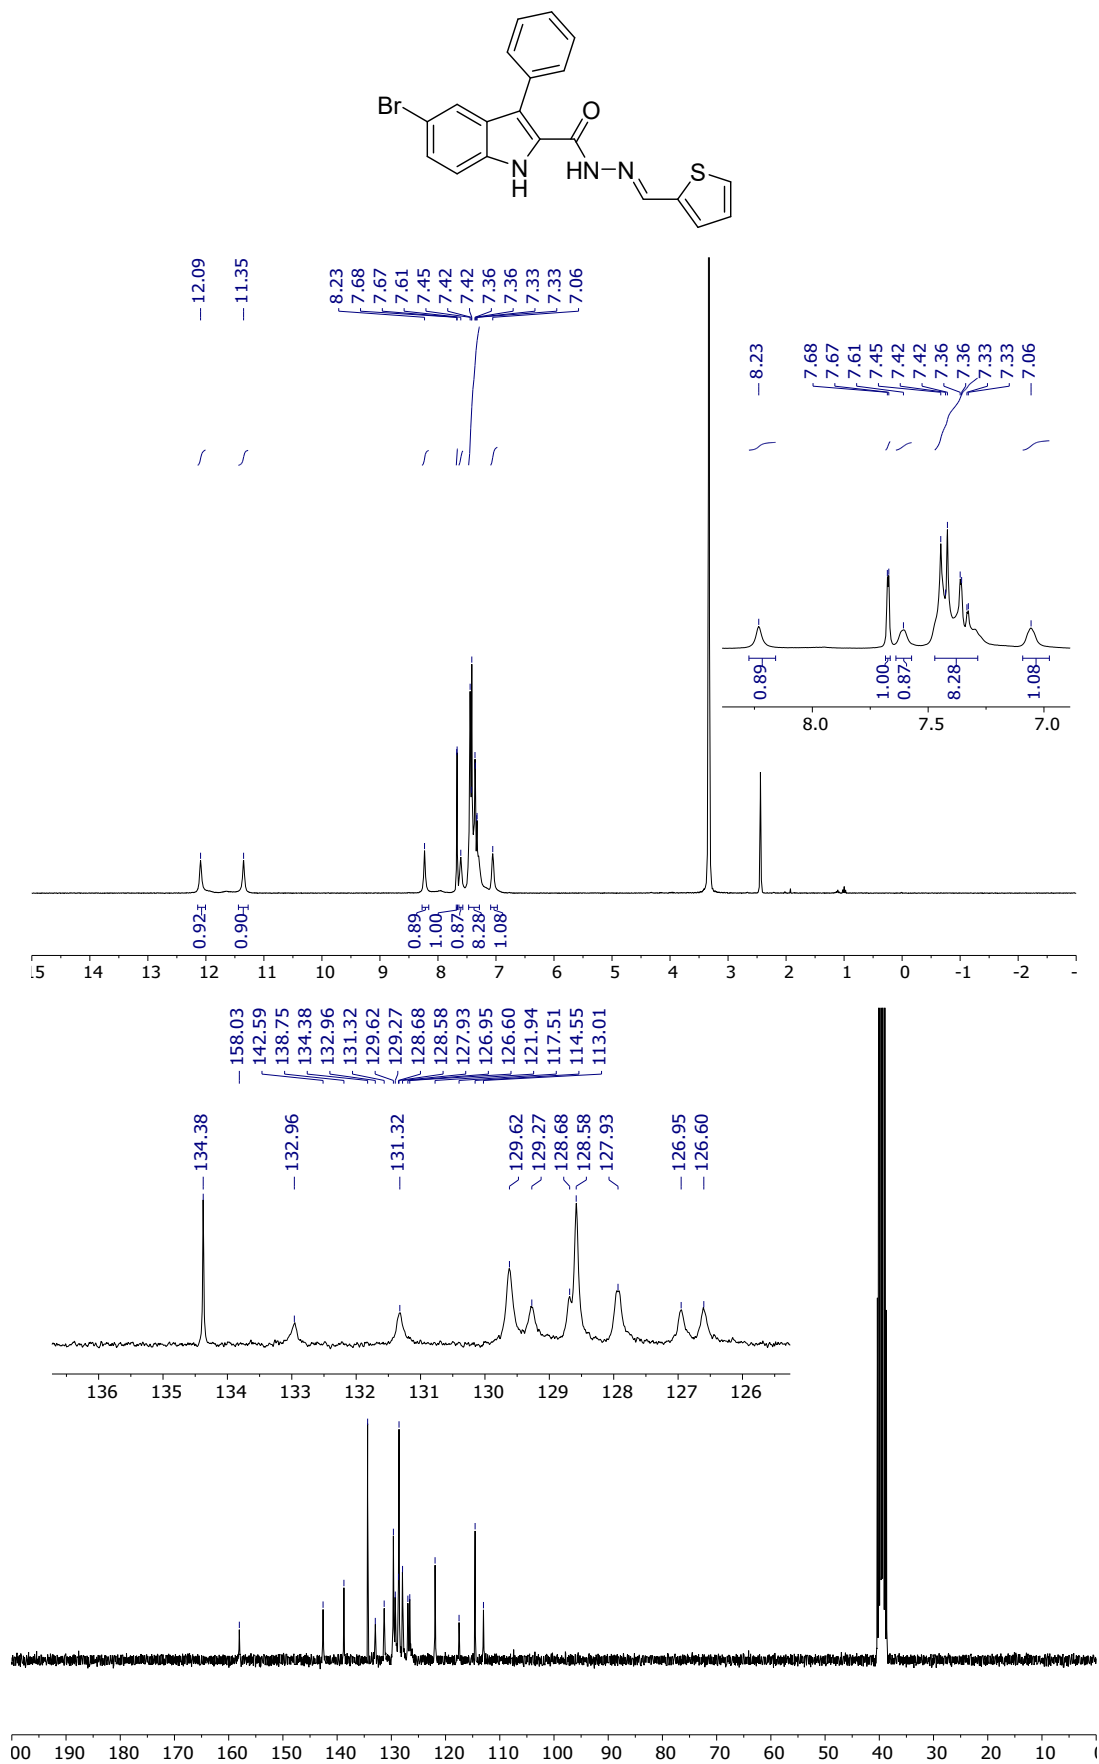

**(E)-5-bromo-3-phenyl-1*H*-indole-2-carbohydrazide (6b)**  
 spectra in dms<sub>o</sub>-d<sub>6</sub>

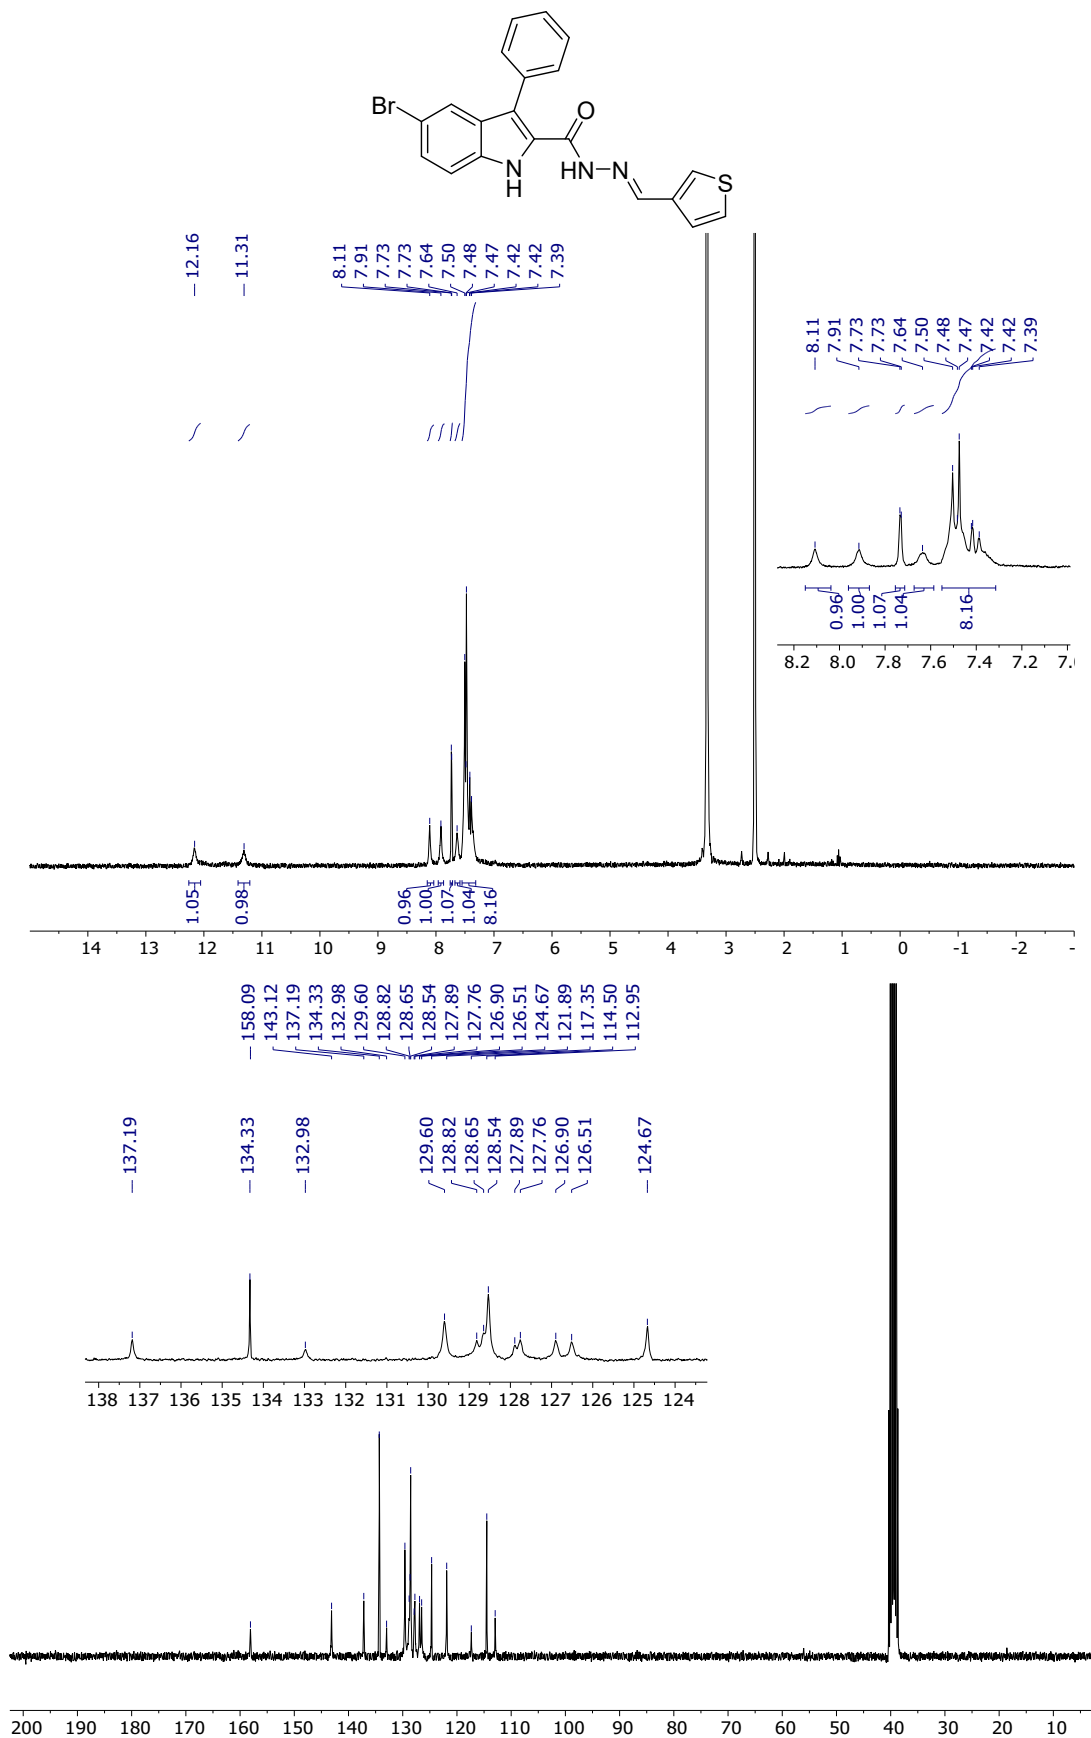

**(E)-5-bromo-*N'*-((5-chlorothiophene-2-yl)methylene)-3-phenyl-1*H*-indole-2-carbohydrazide (6c) spectra in dmsd<sub>6</sub>**

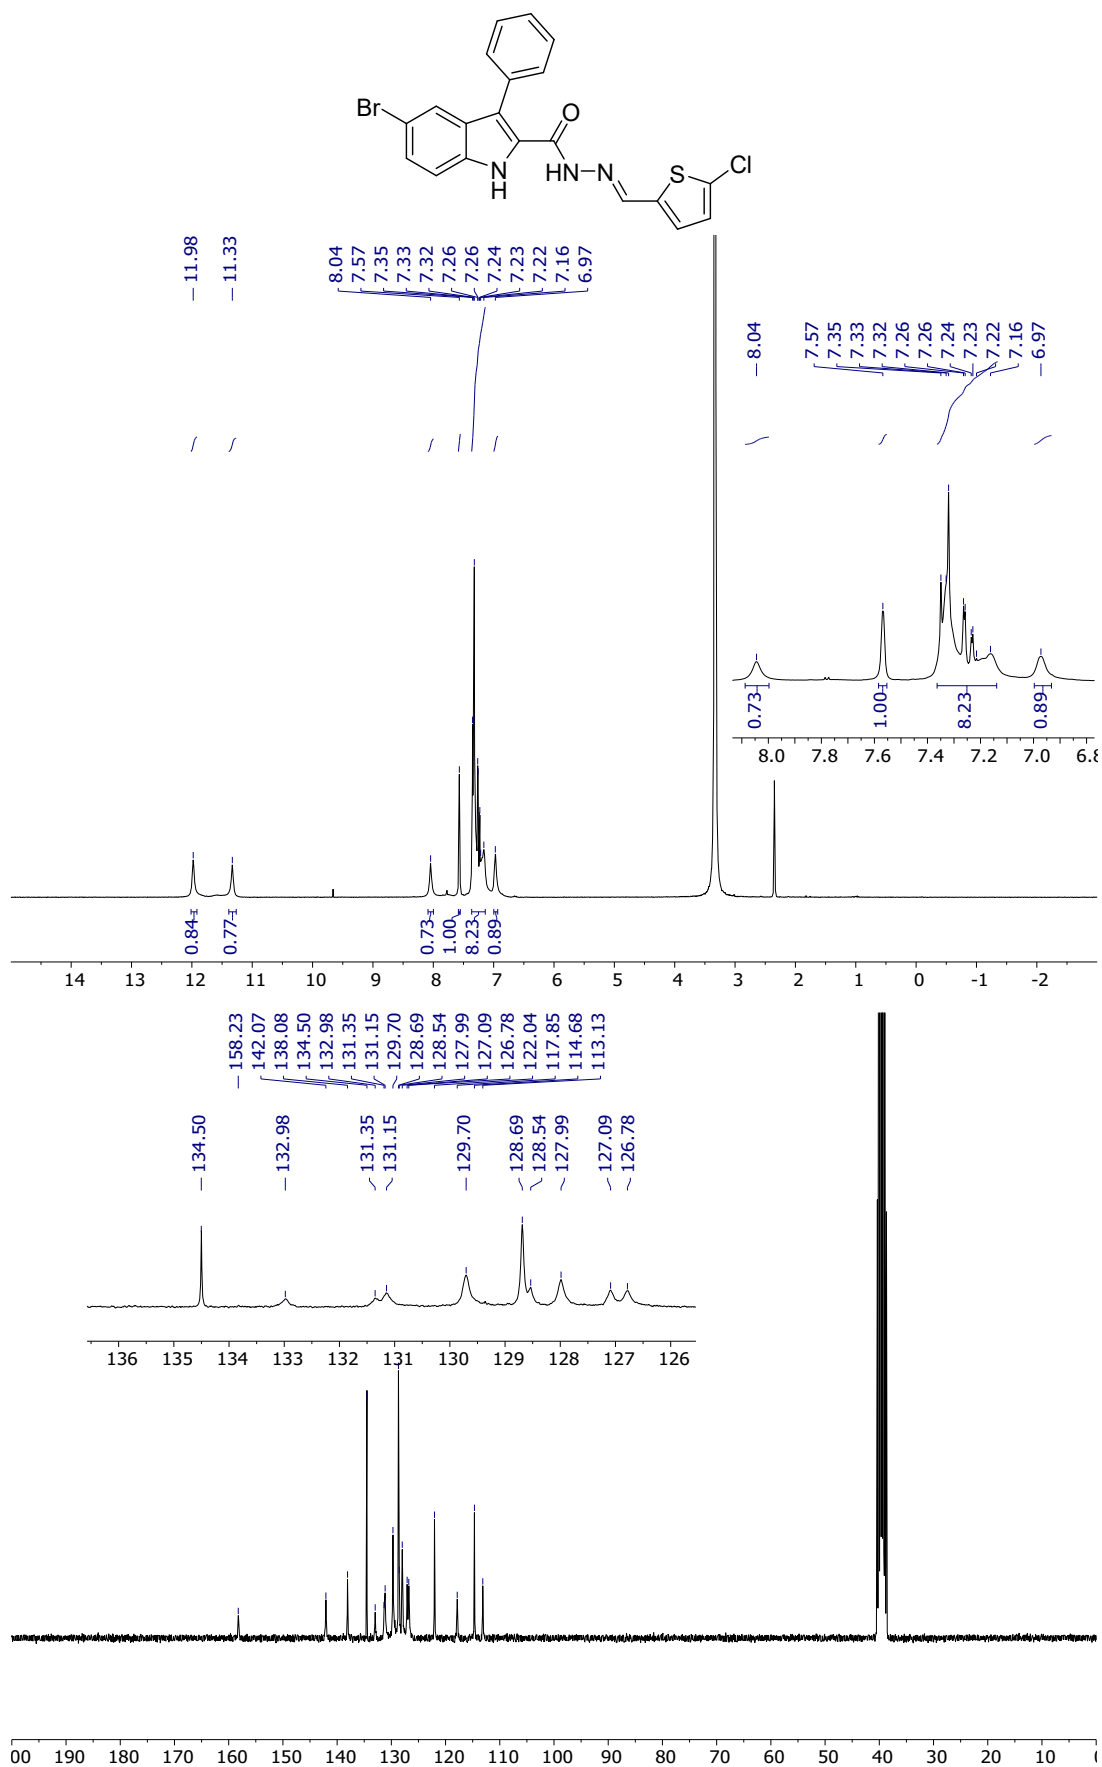

**(E)-5-bromo-*N'*-((5-bromothiophene-2-yl)methylene)-3-phenyl-1*H*-indole-2-carbohydrazide (6d) spectra in dms0-d<sub>6</sub>**

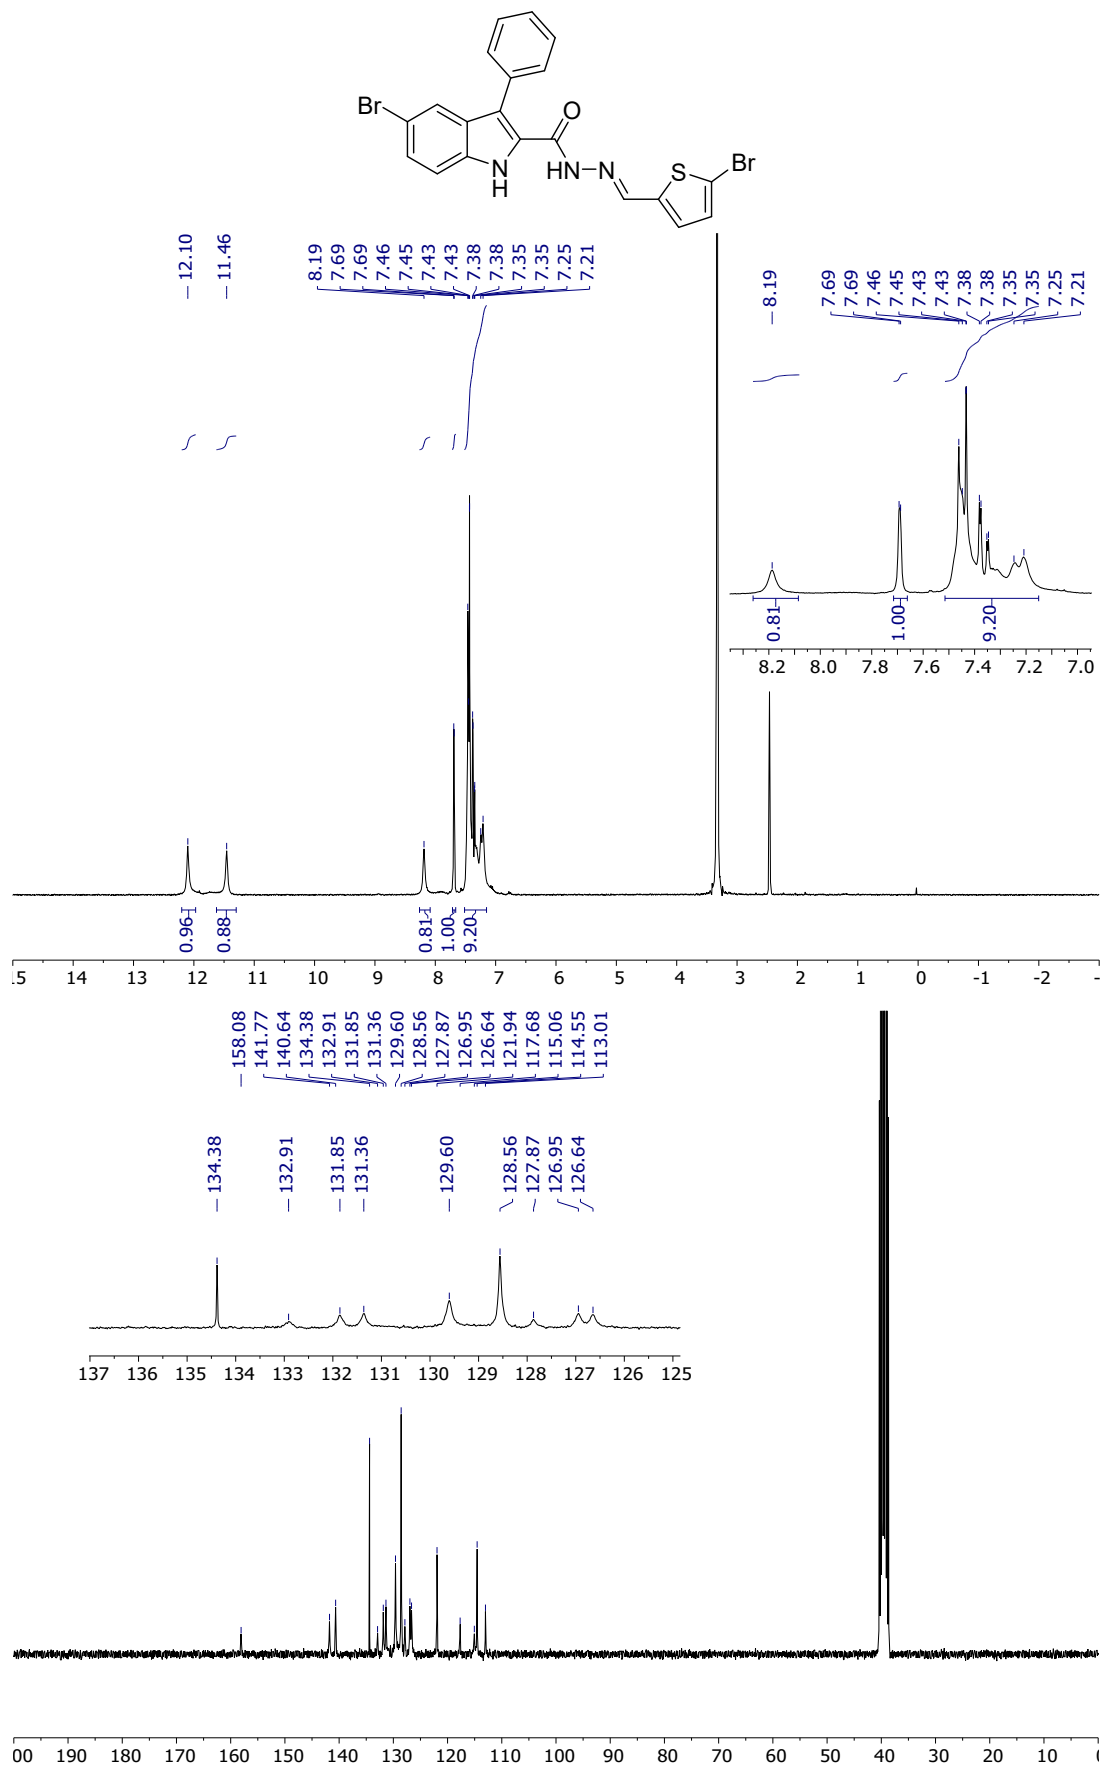

**(E)-5-bromo-N'-((5-cyanothiophene-2-yl)methylene)-3-phenyl-1H-indole-2-carbohydrazide (6e) spectra in dms0-d<sub>6</sub>**

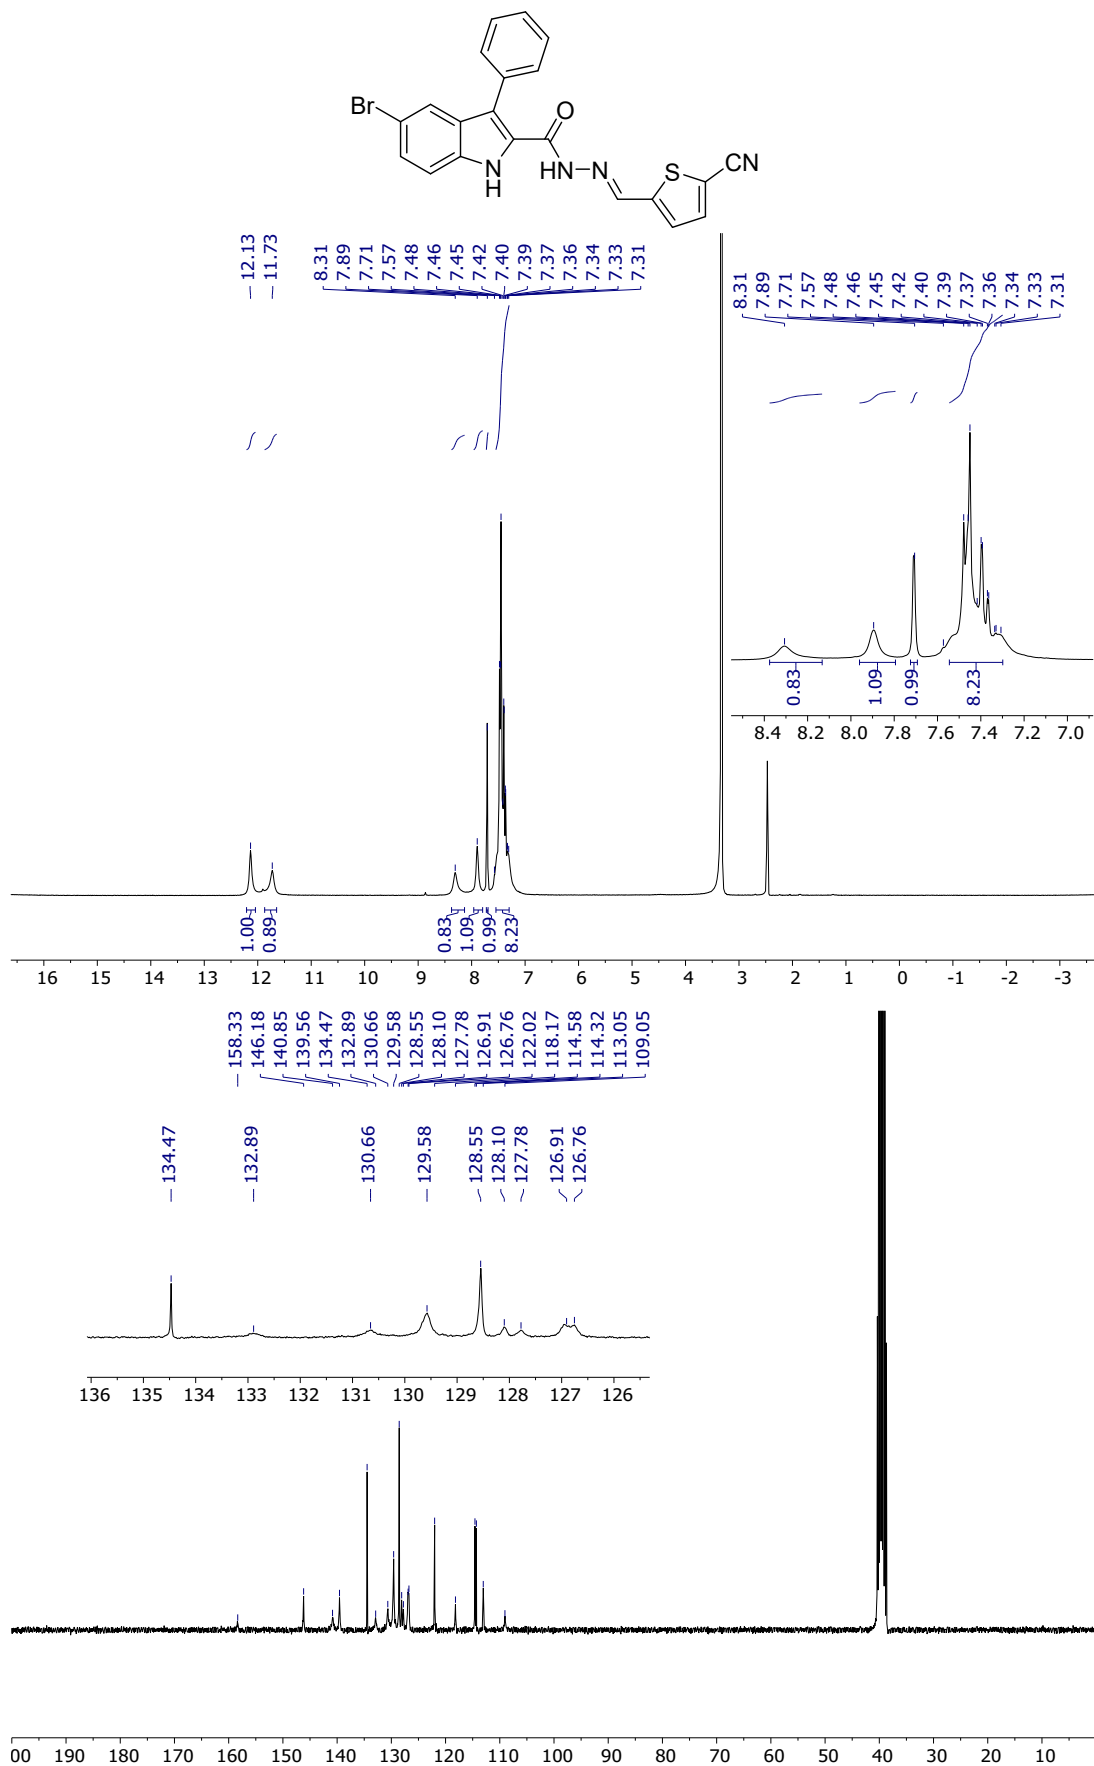

**(E)-5-bromo-*N'*-((5-nitrothiophene-2-yl)methylene)-3-phenyl-1*H*-indole-2-carbohydrazide (6f) spectra in dms0-d<sub>6</sub>**

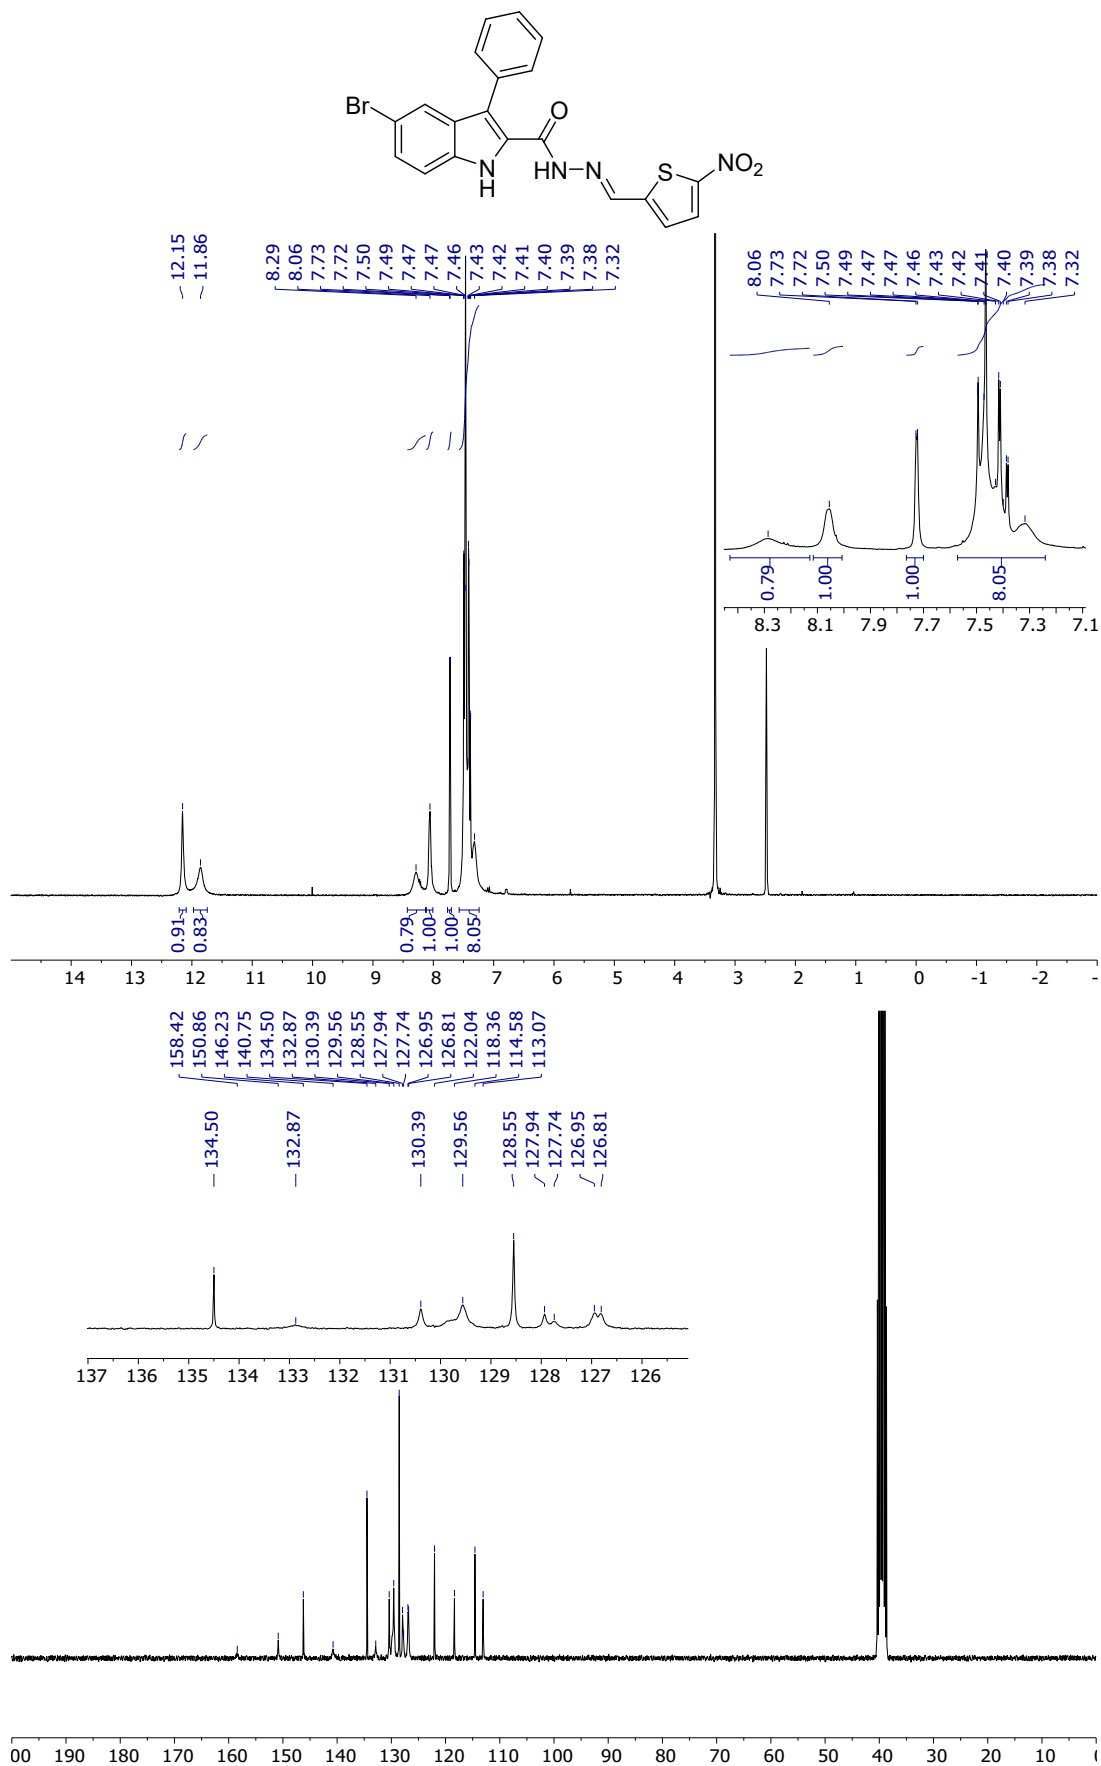

**(E)-5-((2-(5-bromo-3-phenyl-1H-indole-2-carbonyl)hydrazono)methyl)thiophene-2-yl)boronic acid (6g) spectra in dms0-d<sub>6</sub>**

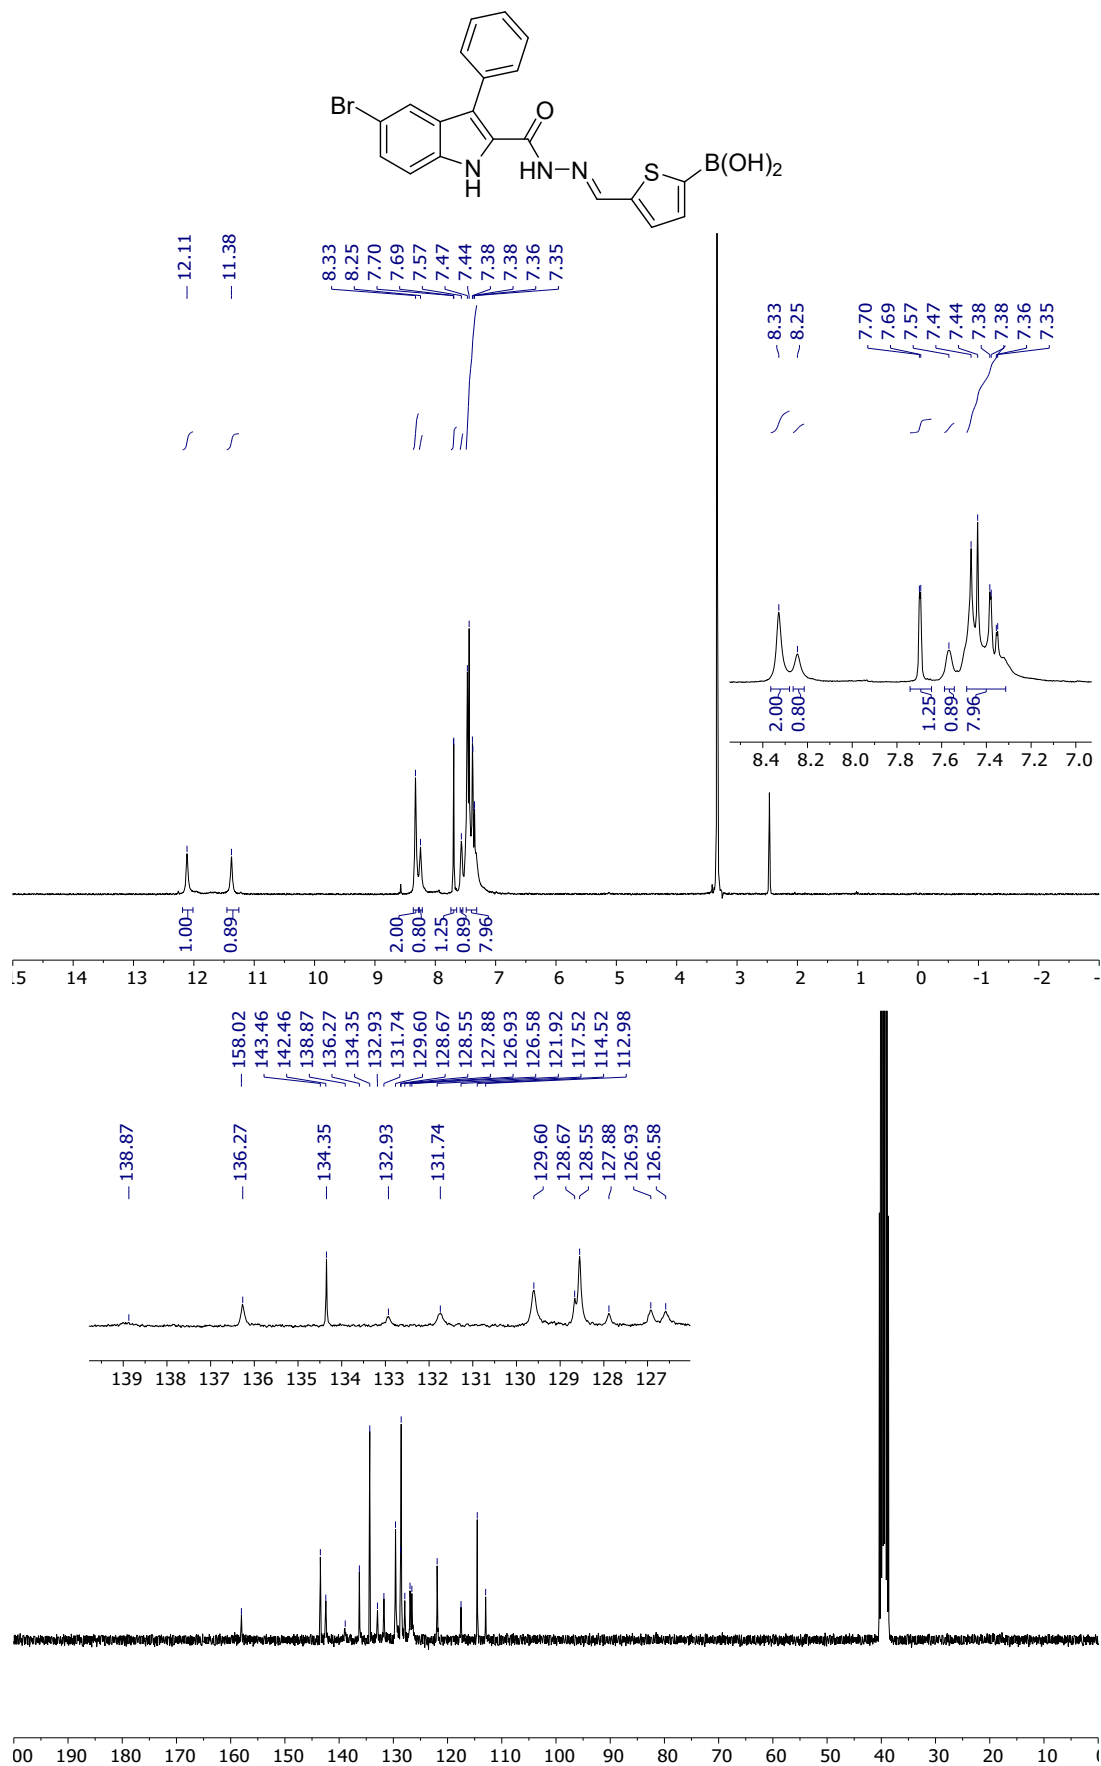

**(E)-5-bromo-N'-((5-methoxythiophene-2-yl)methylene)-3-phenyl-1H-indole-2-carbohydrazide (6h) spectra in dms0-d<sub>6</sub>**

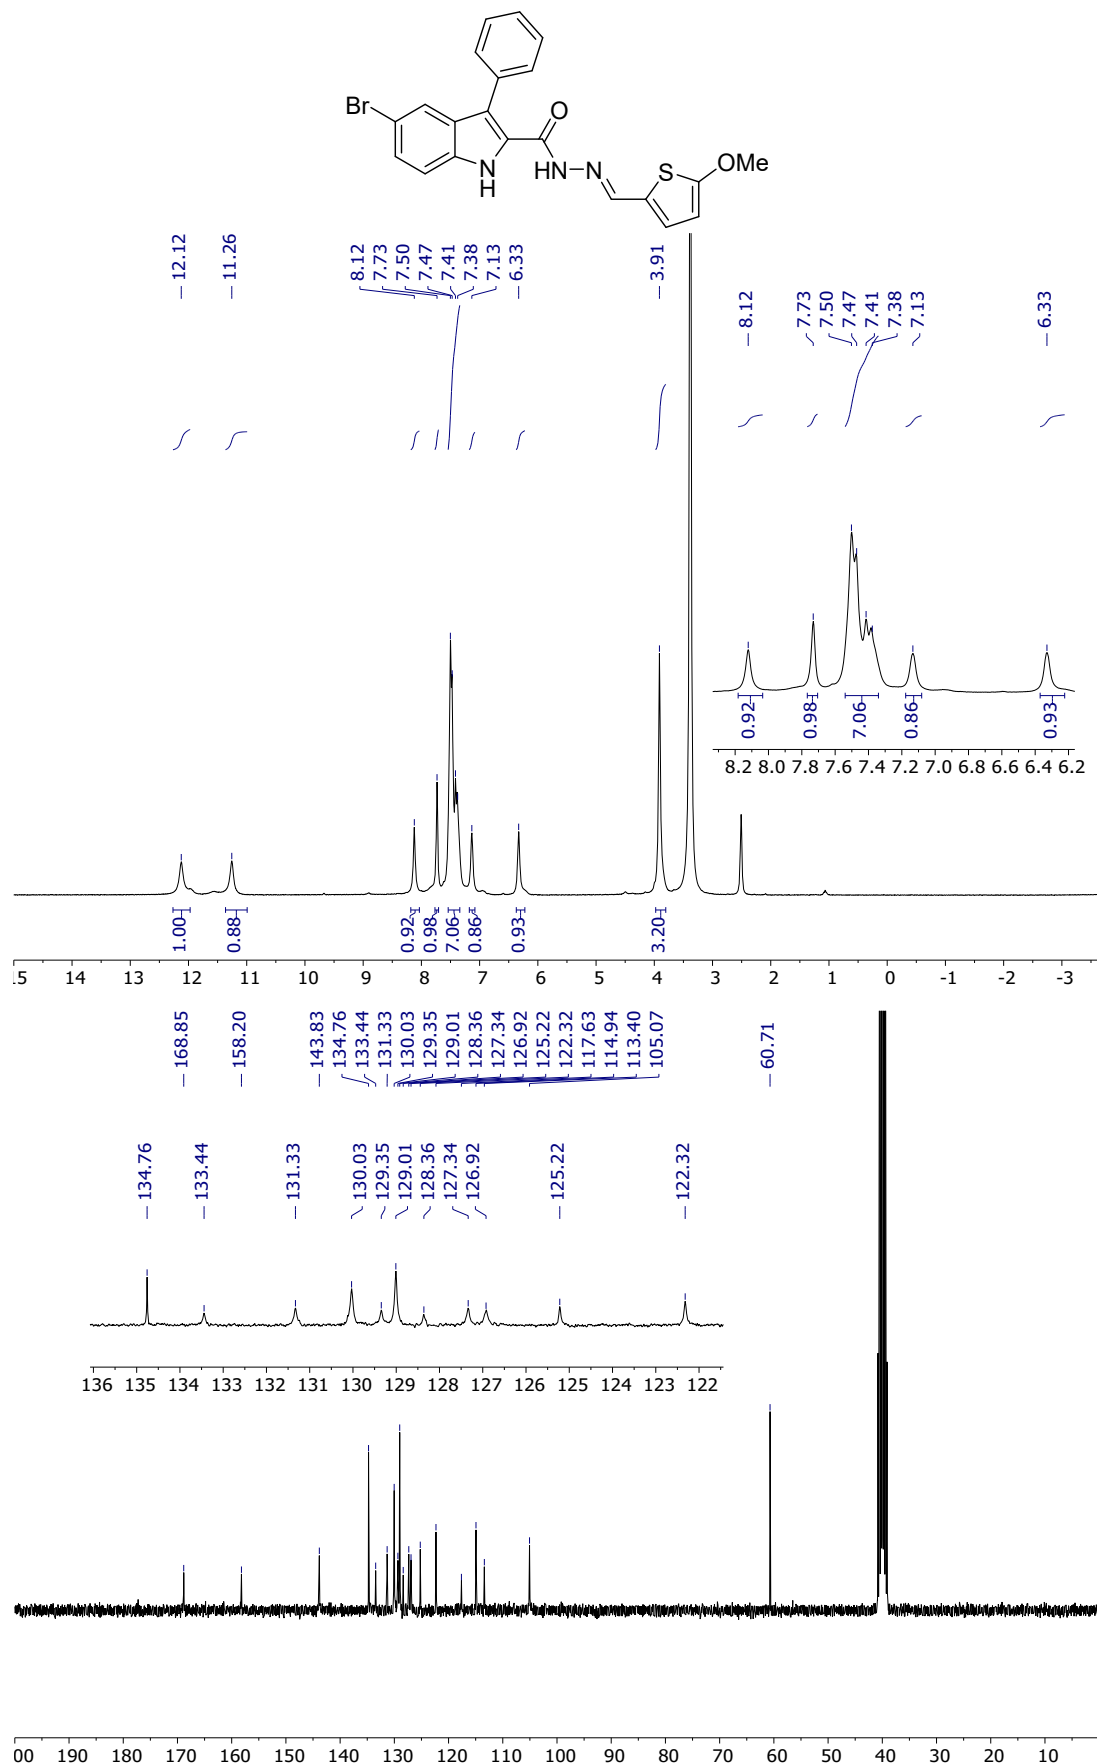



**(E)-5-bromo-*N'*-((4-methoxythiophene-2-yl)methylene)-3-phenyl-1*H*-indole-2-carbohydrazide (6i) spectra in dms0-d<sub>6</sub>**

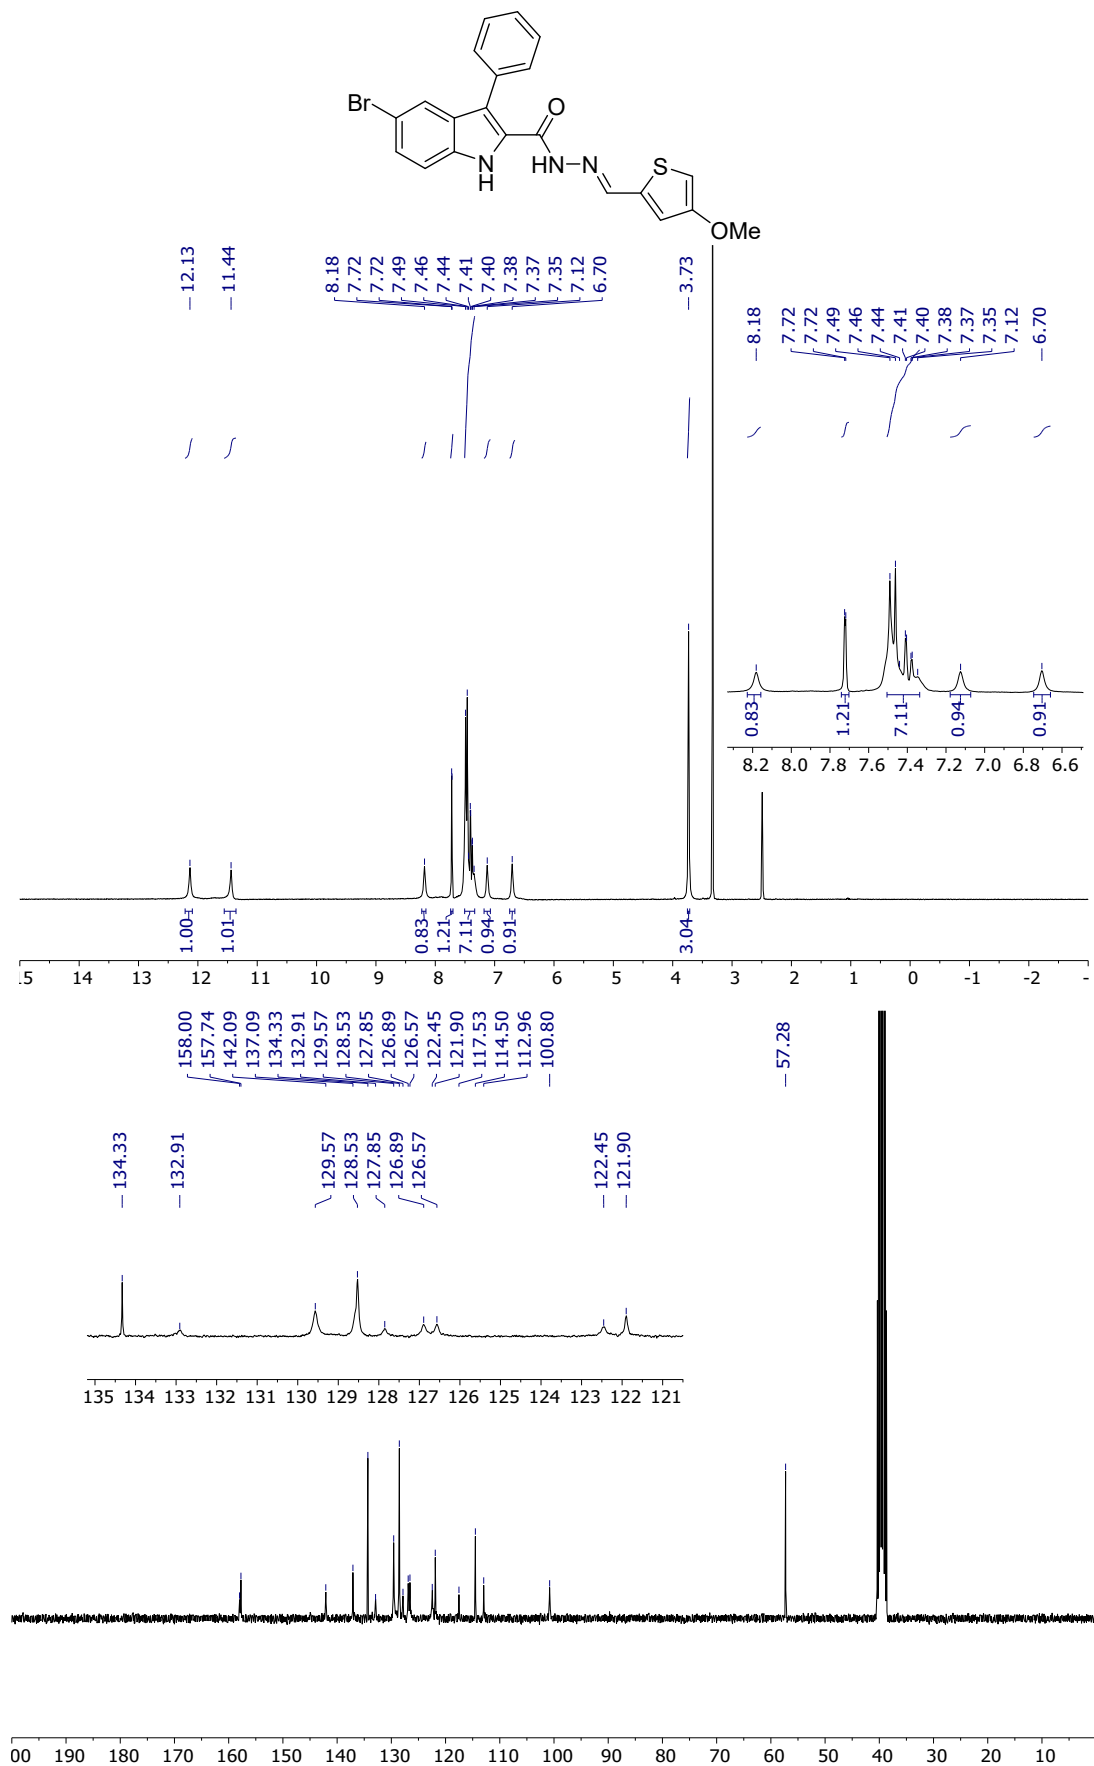

**(E)-5-bromo-*N'*-((3-methoxythiophene-2-yl)methylene)-3-phenyl-1*H*-indole-2-carbohydrazide (6j) spectra in dmsd-d<sub>6</sub>**

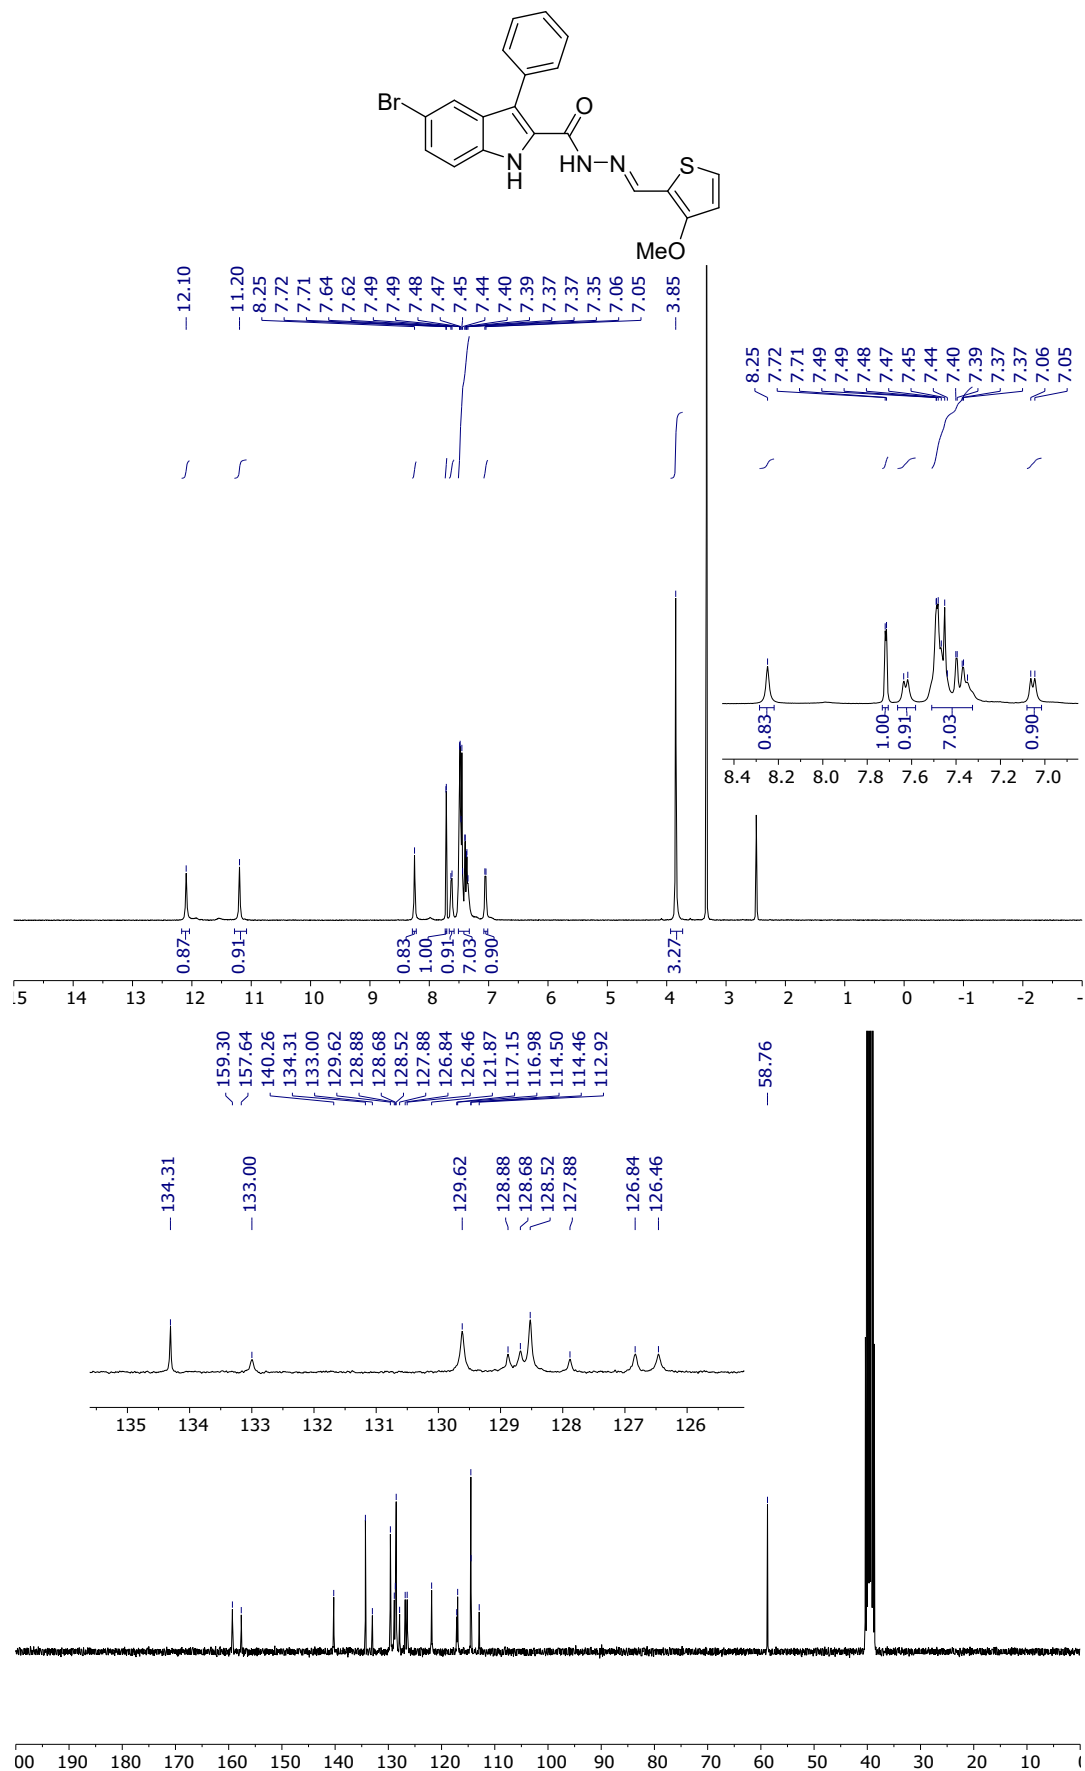

**(E)-5-bromo-N'-((5-(3-nitrophenyl)thiophene-2-yl)methylene)-3-phenyl-1H-indole-2-carbohydrazide (6k) spectra in dms0-d<sub>6</sub>**

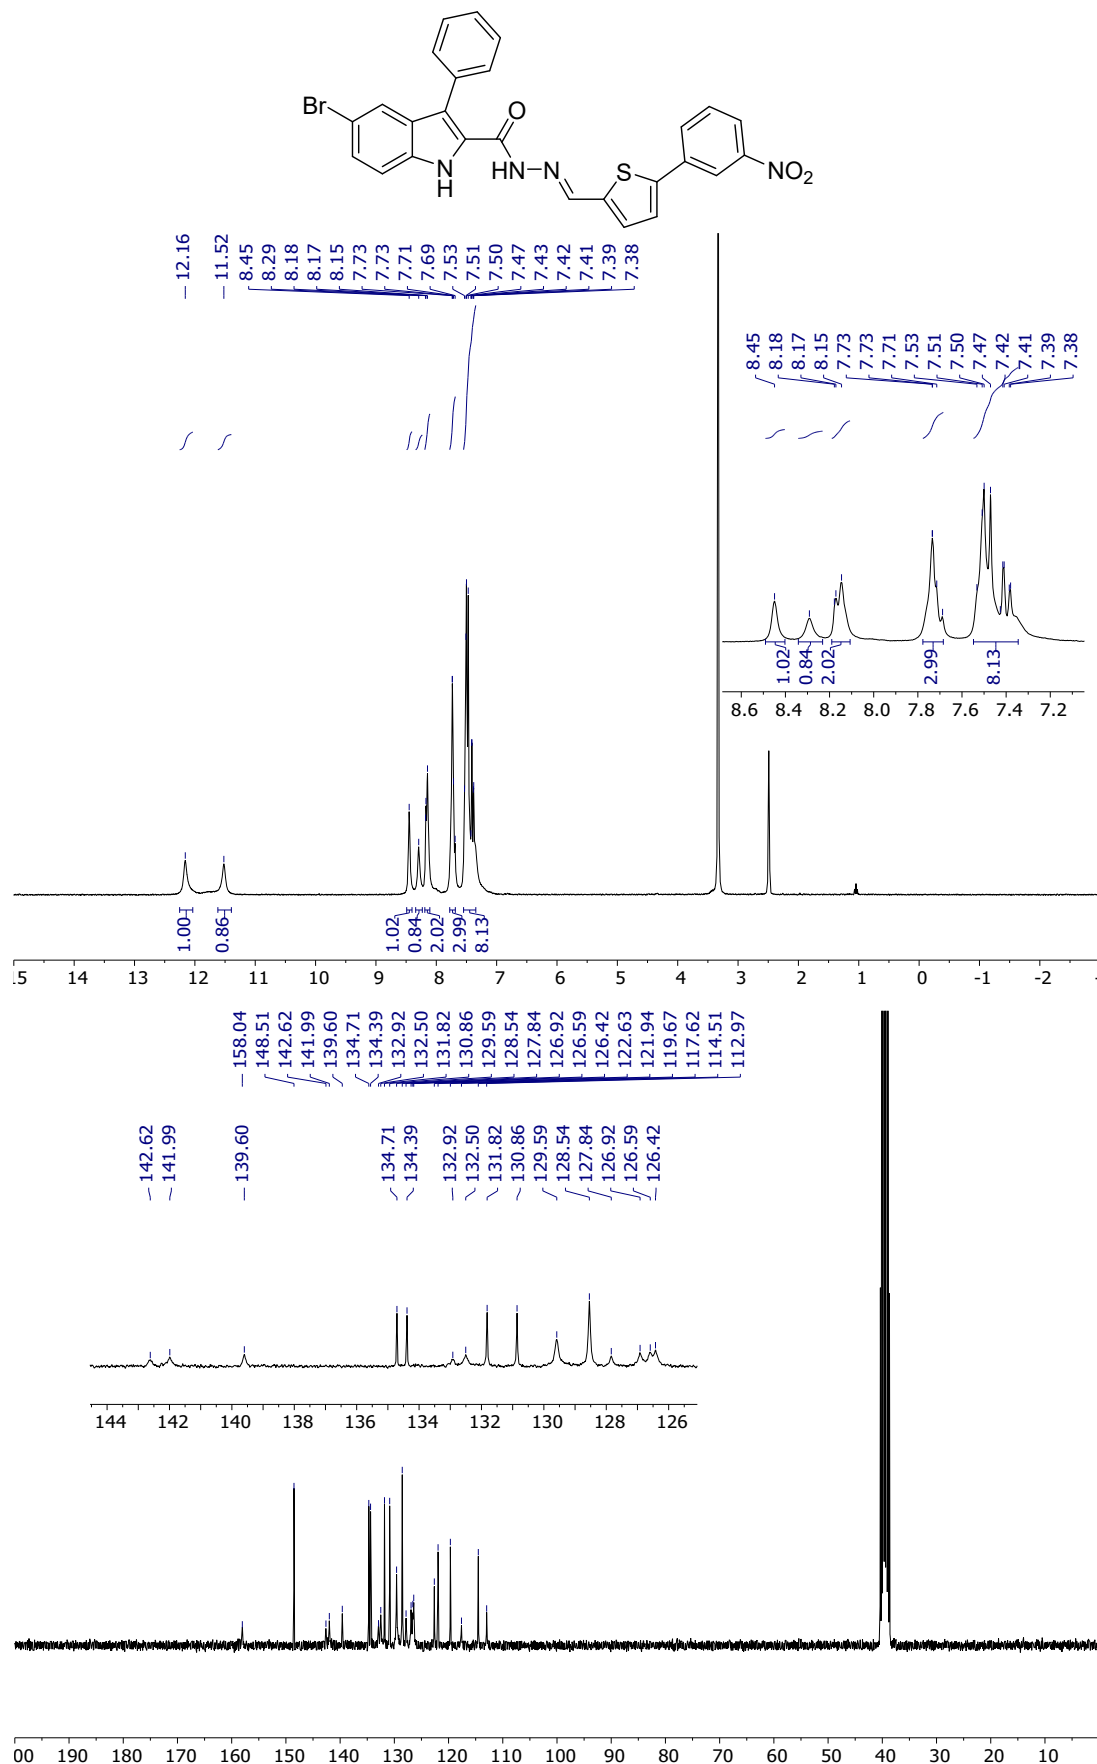

**(E)-5-bromo-*N'*-((5-(3-methoxyphenyl)thiophene-2-yl)methylene)-3-phenyl-1*H*-indole-2-carbohydrazide (6l) spectra in dms- $d_6$**

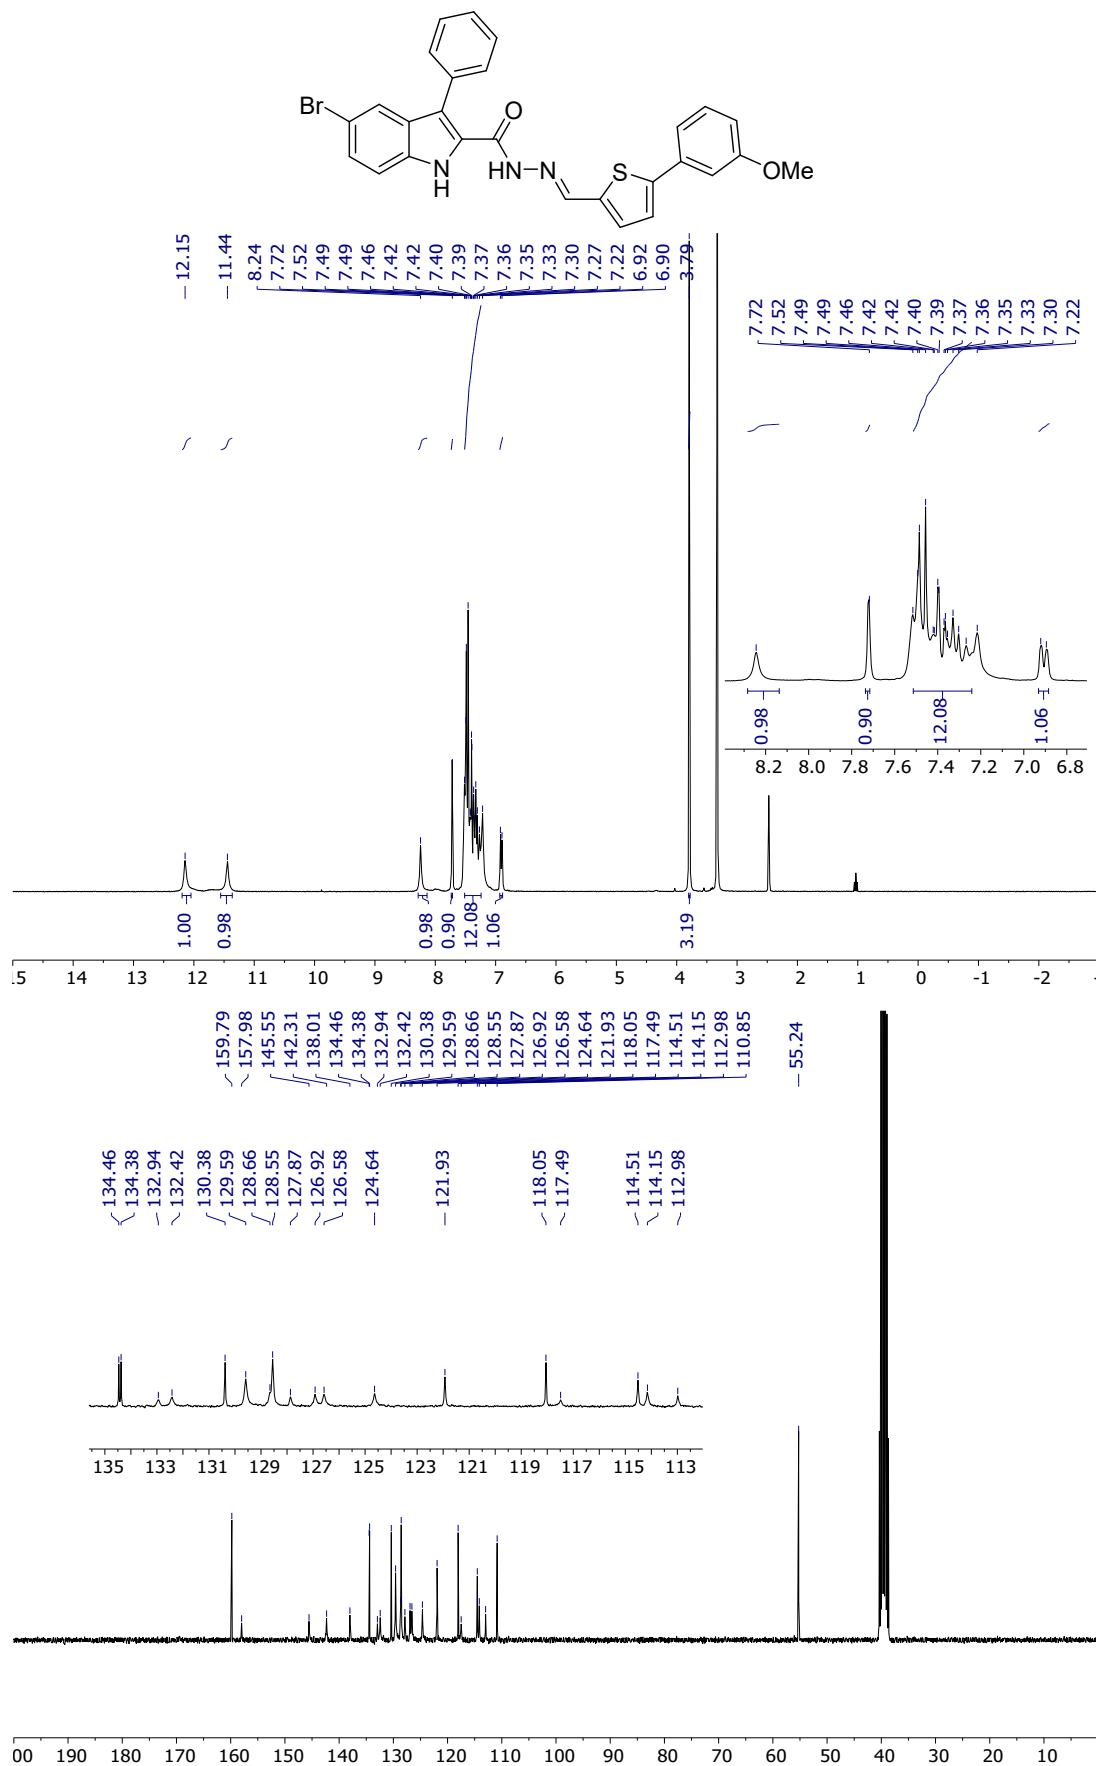

**(E)-4-(5-((2-(5-bromo-3-phenyl-1H-indole-2-carbonyl)hydrazono)methyl)thiophene-2-yl)benzoic acid (6m) spectra in dms0-d<sub>6</sub>**

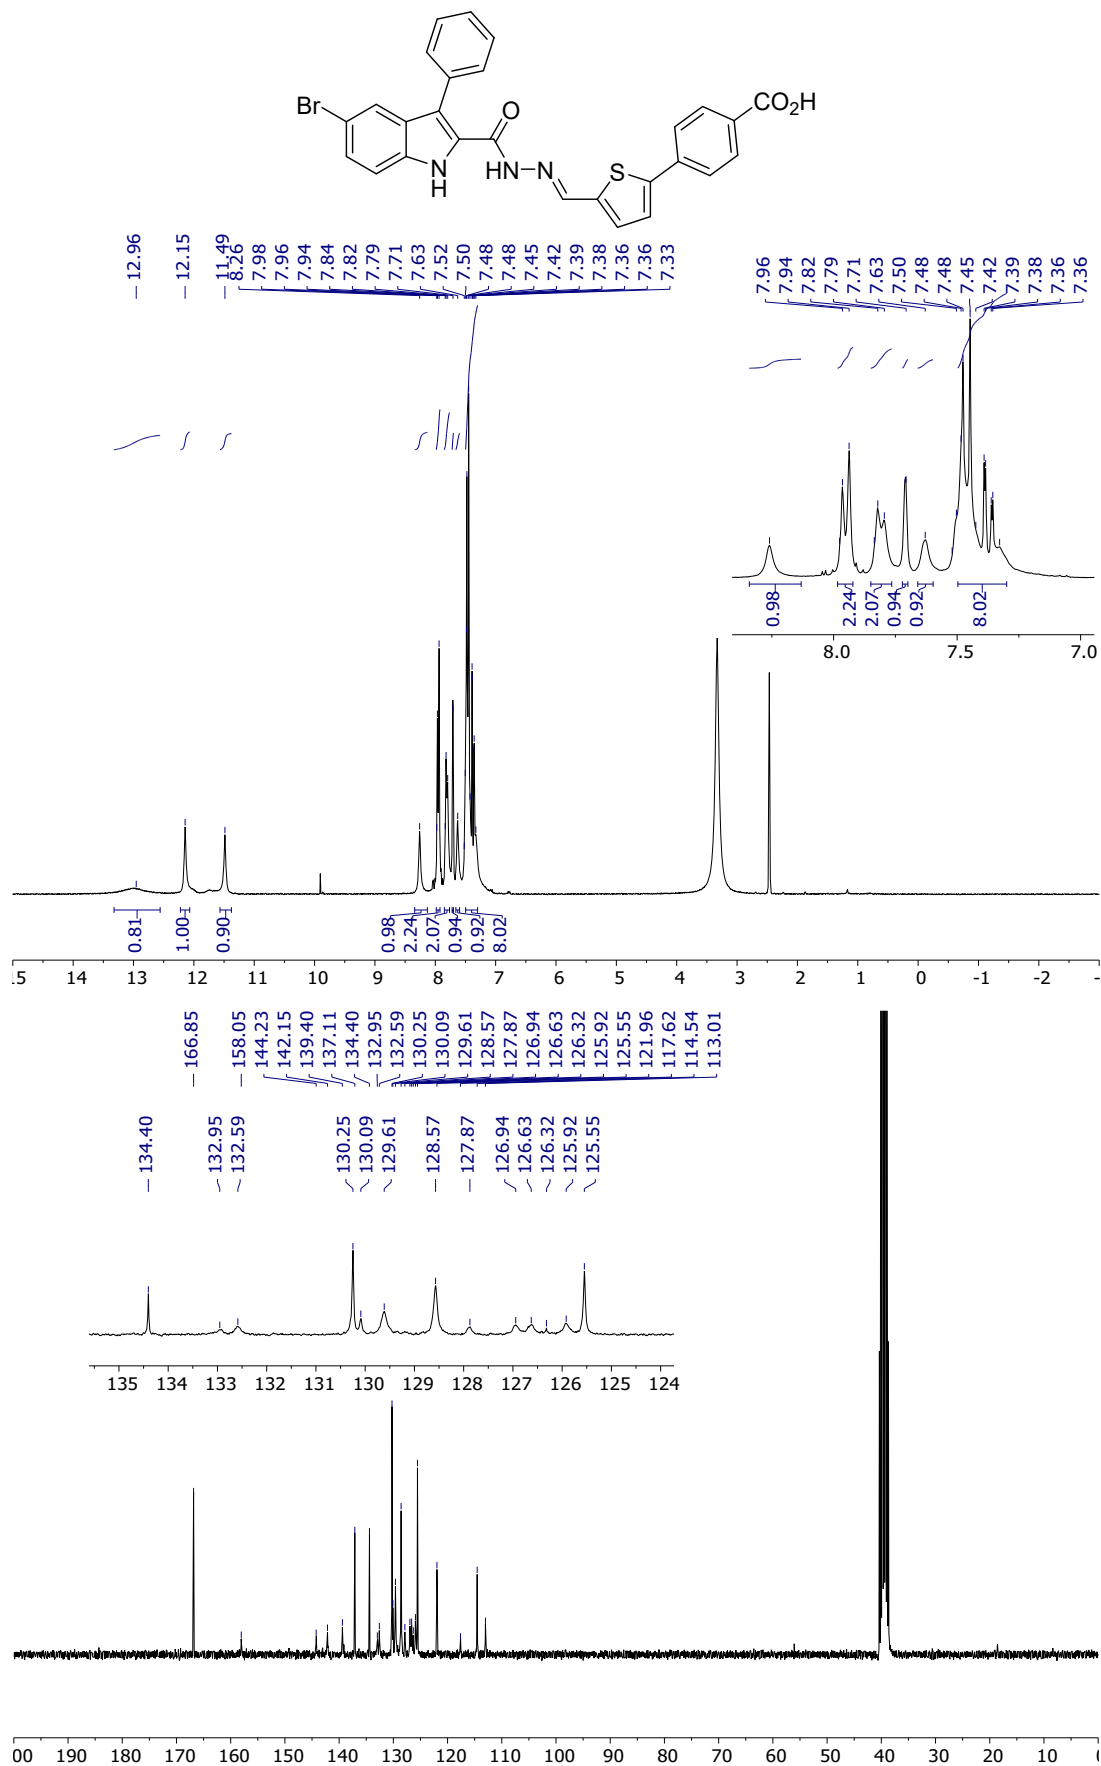

**(E)-3-(5-((2-(5-bromo-3-phenyl-1H-indole-2-carbonyl)hydrazono)methyl)thiophene-2-yl)benzoic acid (6n) spectra in dms0-d<sub>6</sub>**

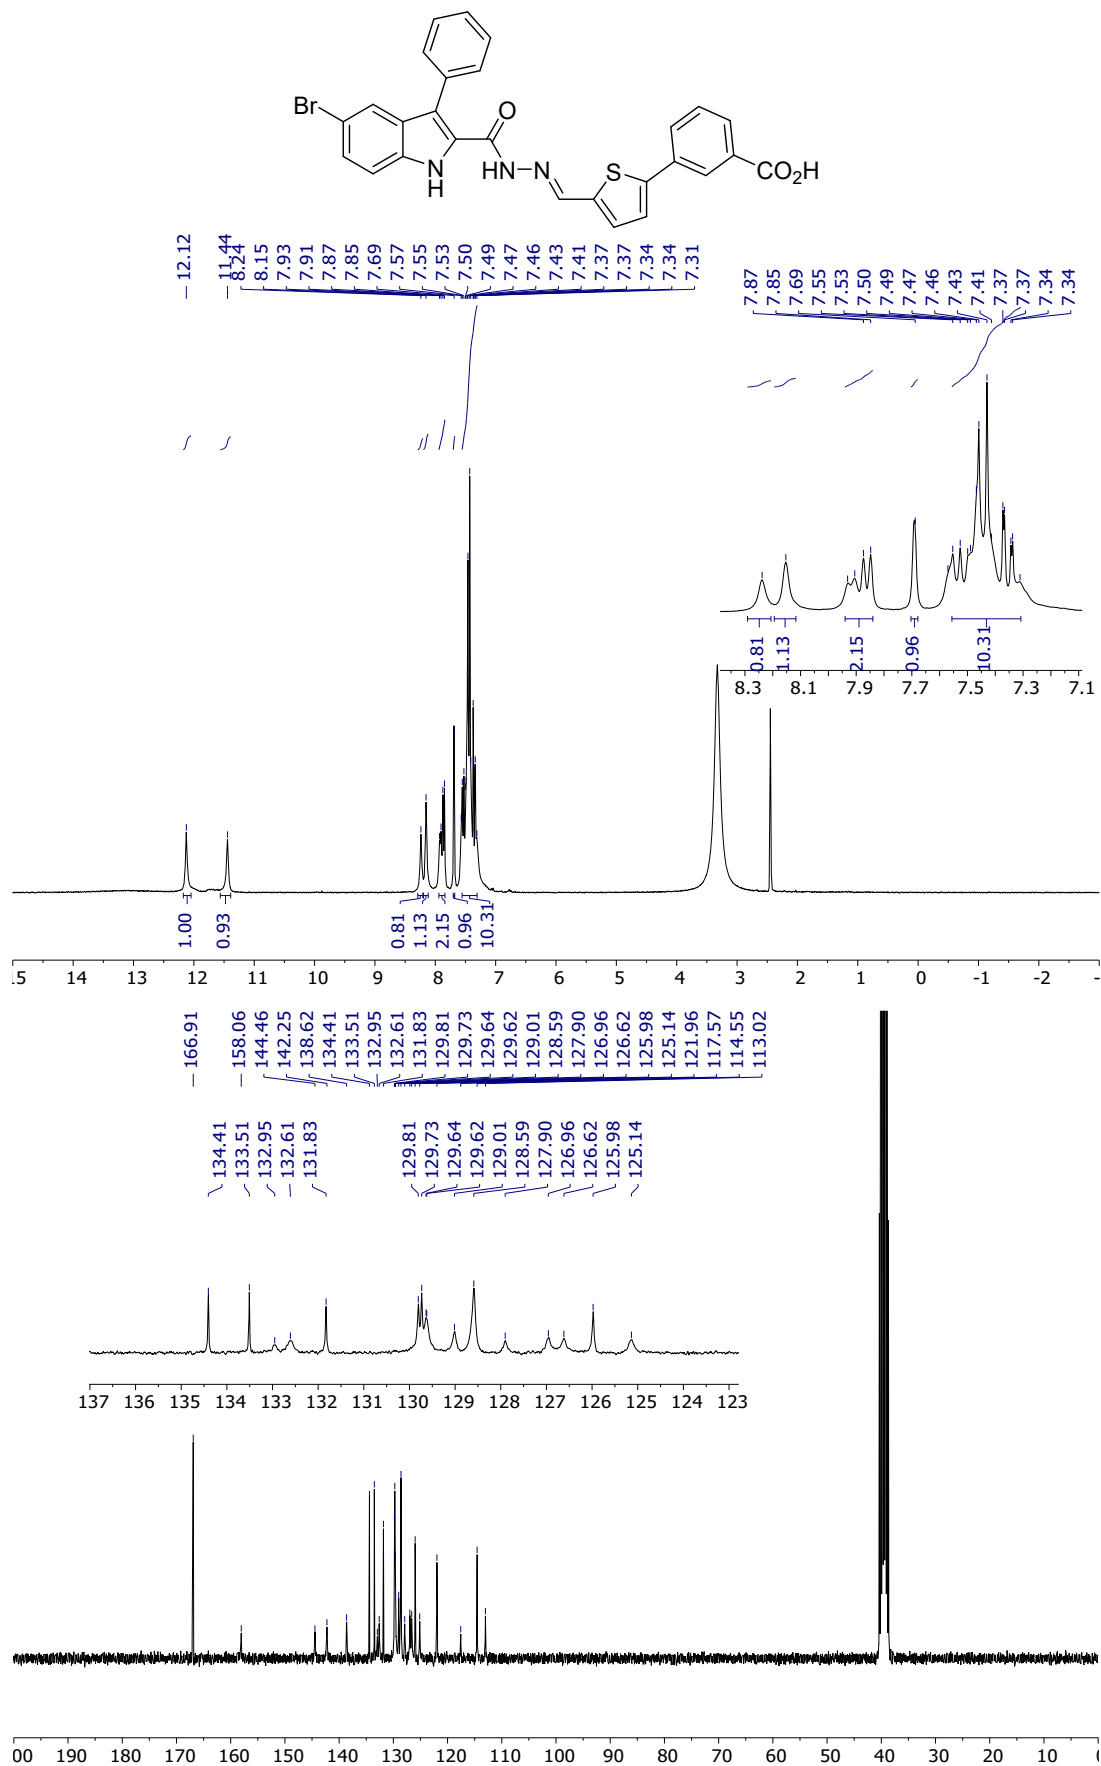

**(E)-5-bromo-*N'*-((5-(4-hydroxyphenyl)thiophene-2-yl)methylene)-3-phenyl-1*H*-indole-2-carbohydrazide (60) spectra in dmsd<sub>6</sub>**

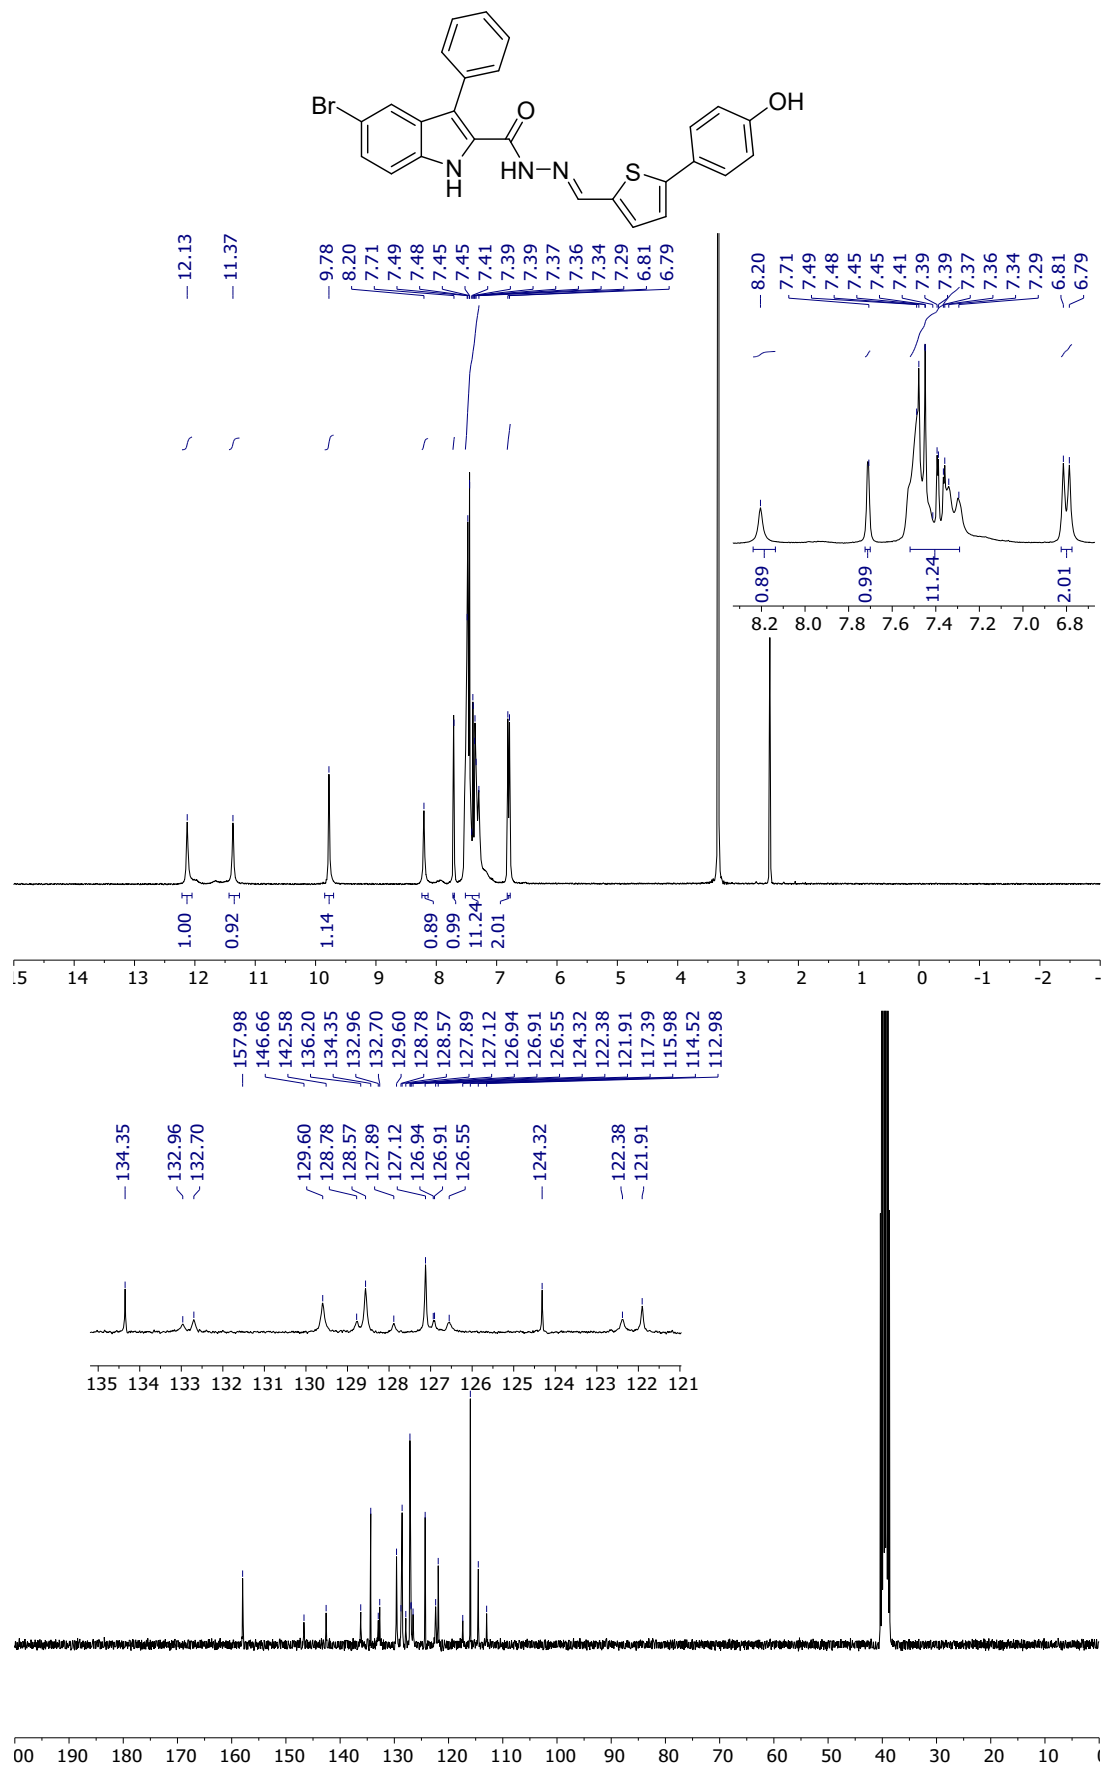

5-bromo-3-phenyl-1*H*-indole-2-carbohydrazide (8) spectra in dms0-d<sub>6</sub>

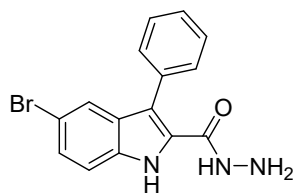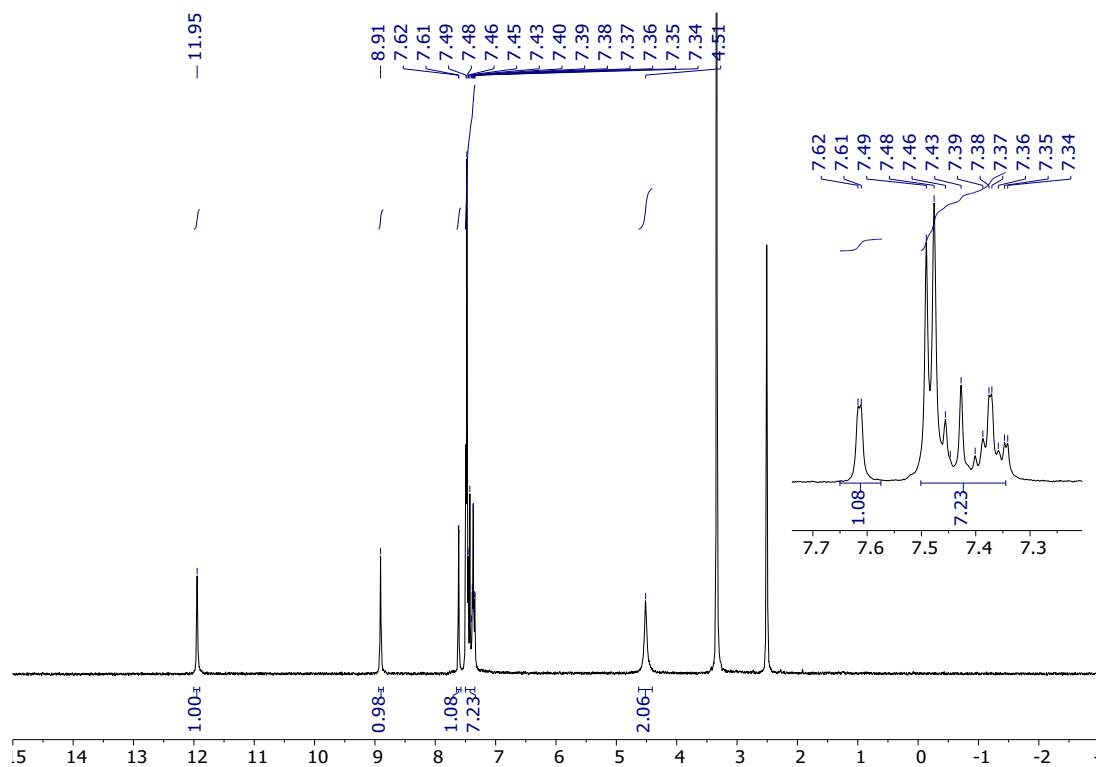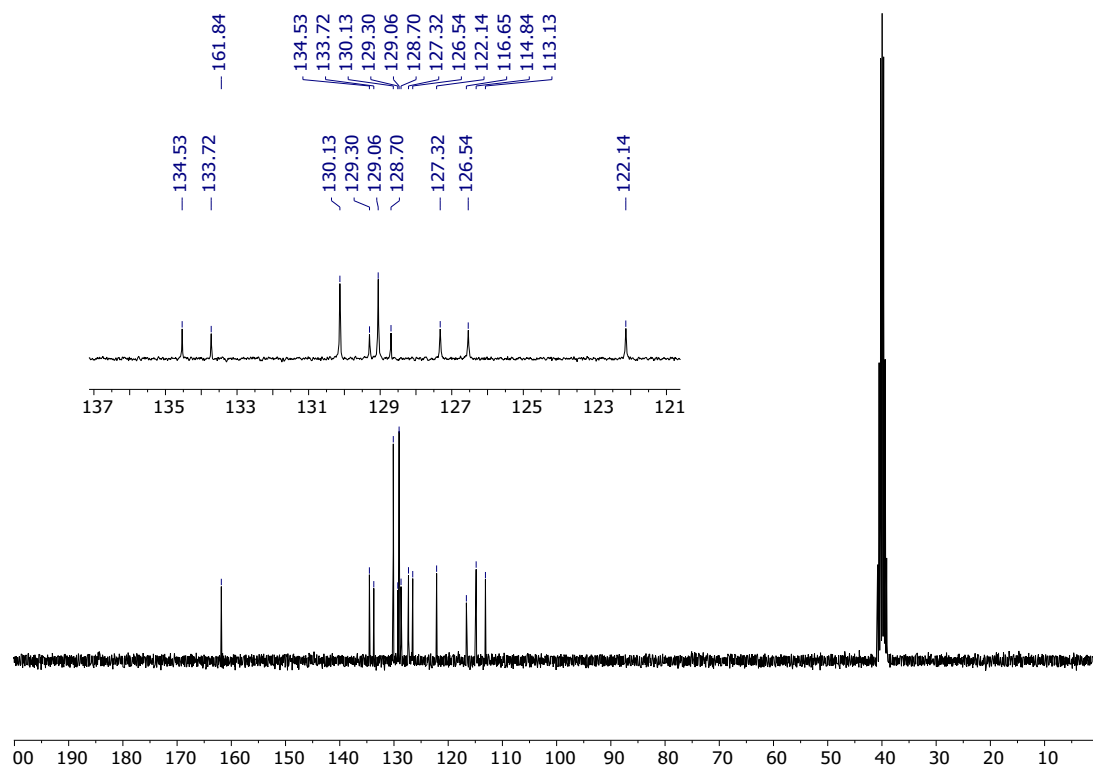



Figure S1. NCI60 one dose screen

Compound 5a

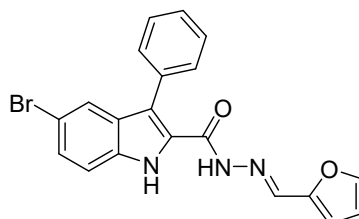

Developmental Therapeutics Program

NSC: D-832480 / 1

Conc: 1.00E-5 Molar

Test Date: Aug 30, 2021

One Dose Mean Graph

Experiment ID: 2108OS84

Report Date: Jan 25, 2022

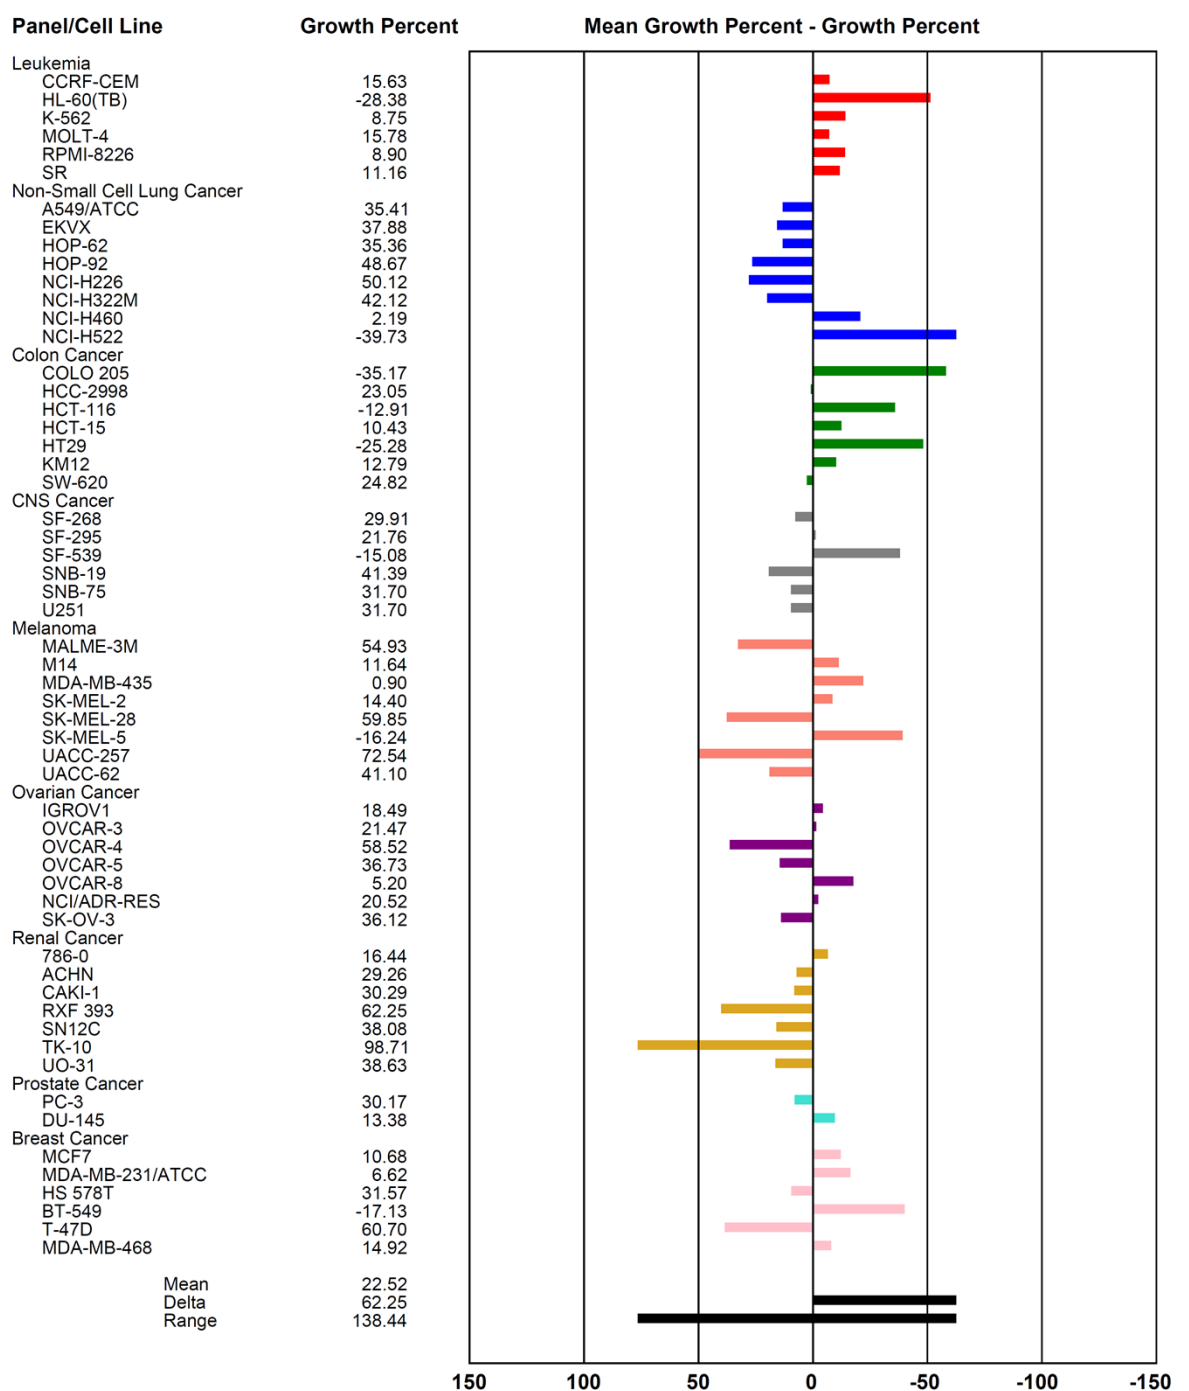

# Compound 5b

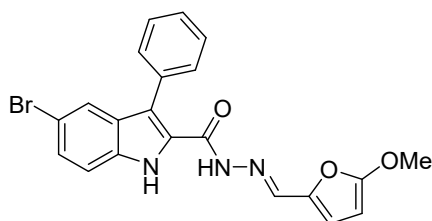

## Developmental Therapeutics Program

NSC: D-832481 / 1

Conc: 1.00E-5 Molar

Test Date: Aug 30, 2021

## One Dose Mean Graph

Experiment ID: 2108OS84

Report Date: Jan 25, 2022

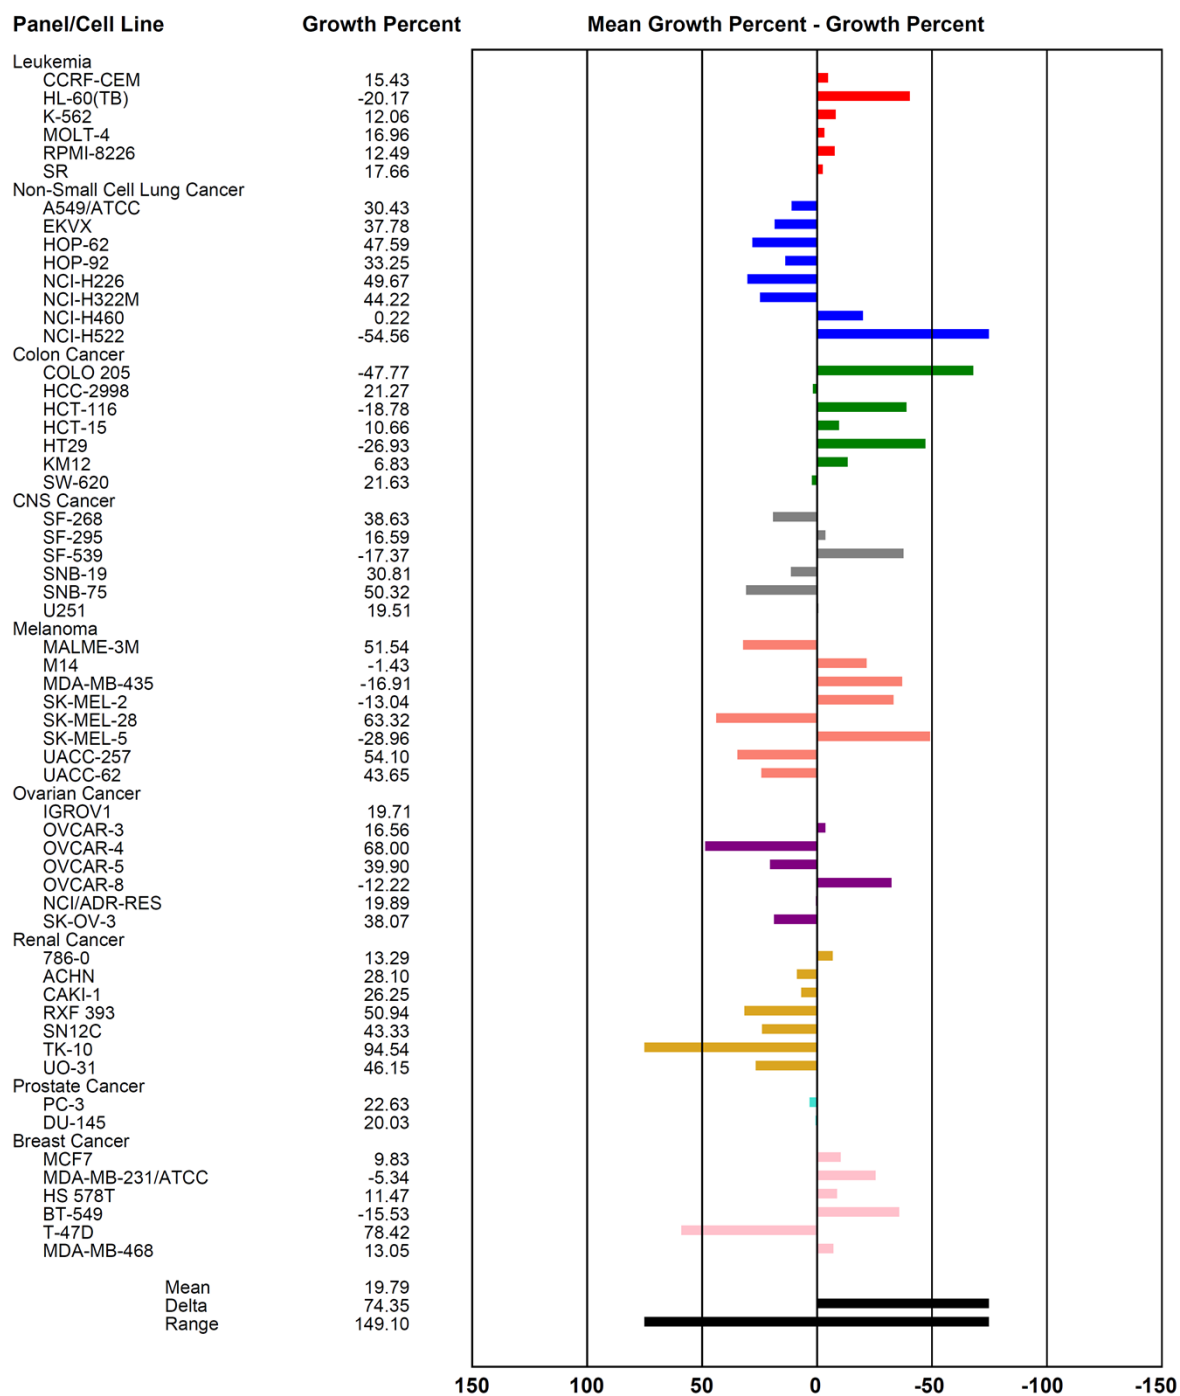

# Compound 5e

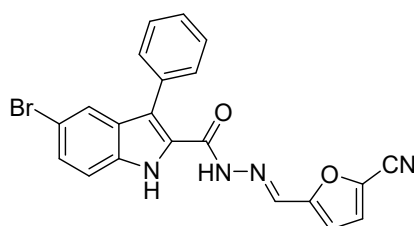

## Developmental Therapeutics Program

NSC: D-838296 / 1

Conc: 1.00E-5 Molar

Test Date: May 23, 2022

## One Dose Mean Graph

Experiment ID: 2205OS30

Report Date: Jun 26, 2022

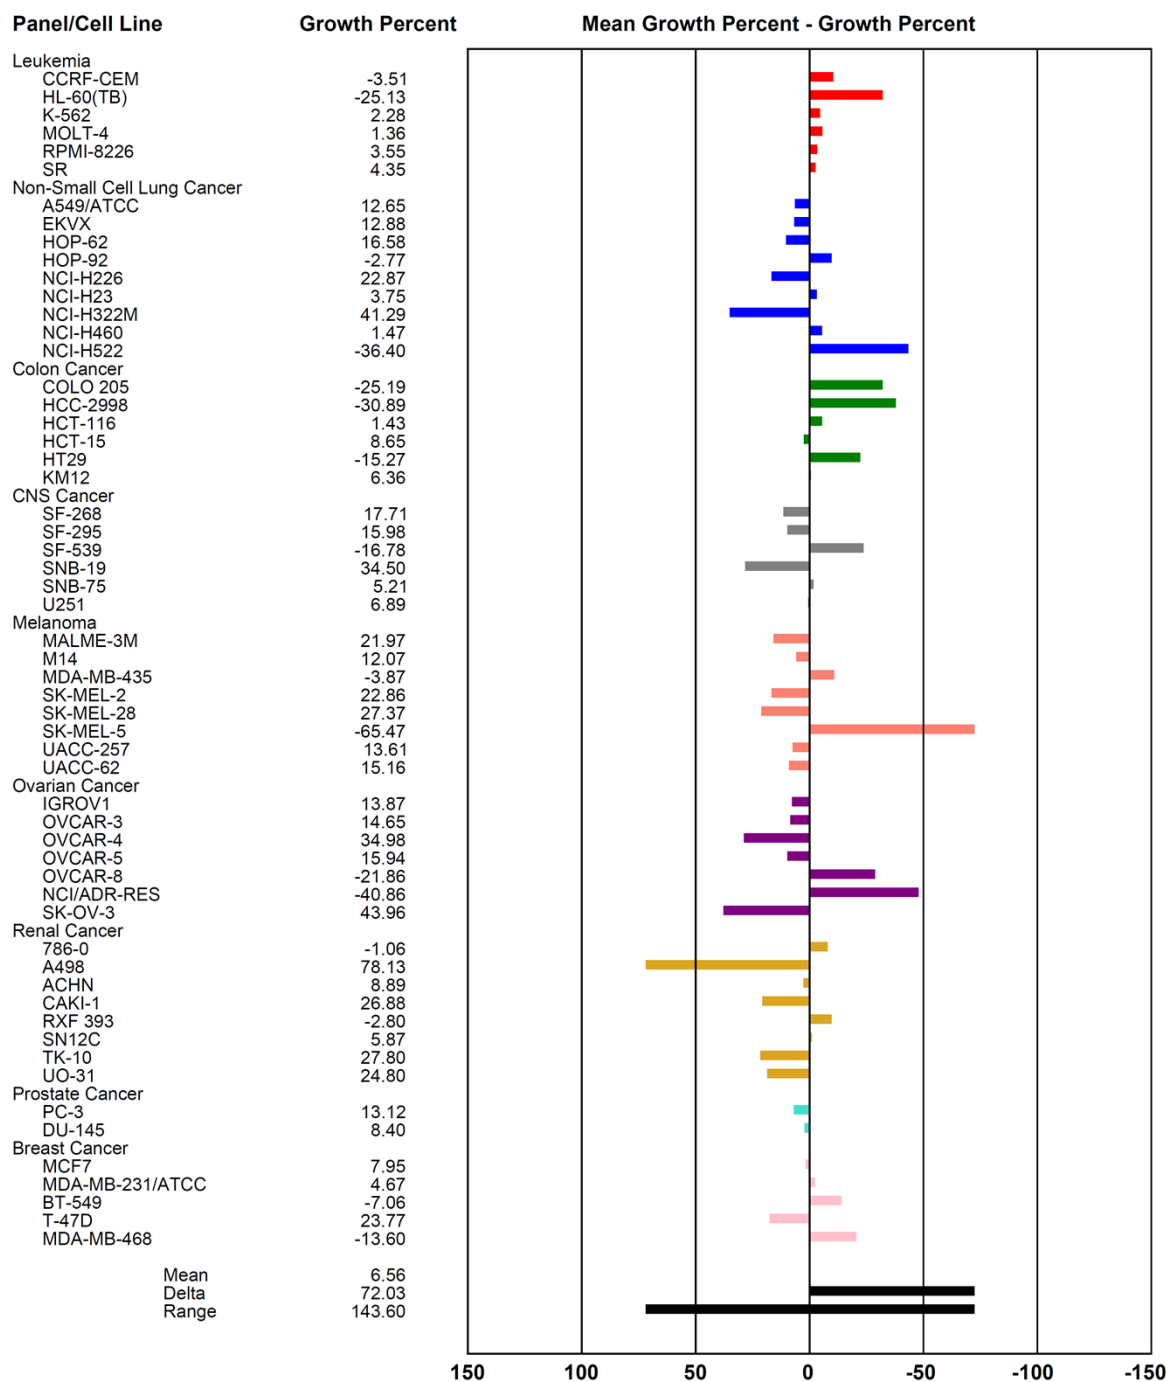

Compound 5f

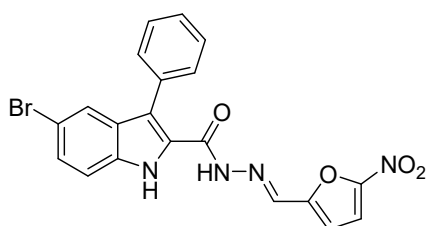

Developmental Therapeutics Program

NSC: D-832483 / 1

Conc: 1.00E-5 Molar

Test Date: Aug 30, 2021

One Dose Mean Graph

Experiment ID: 2108OS84

Report Date: Jan 25, 2022

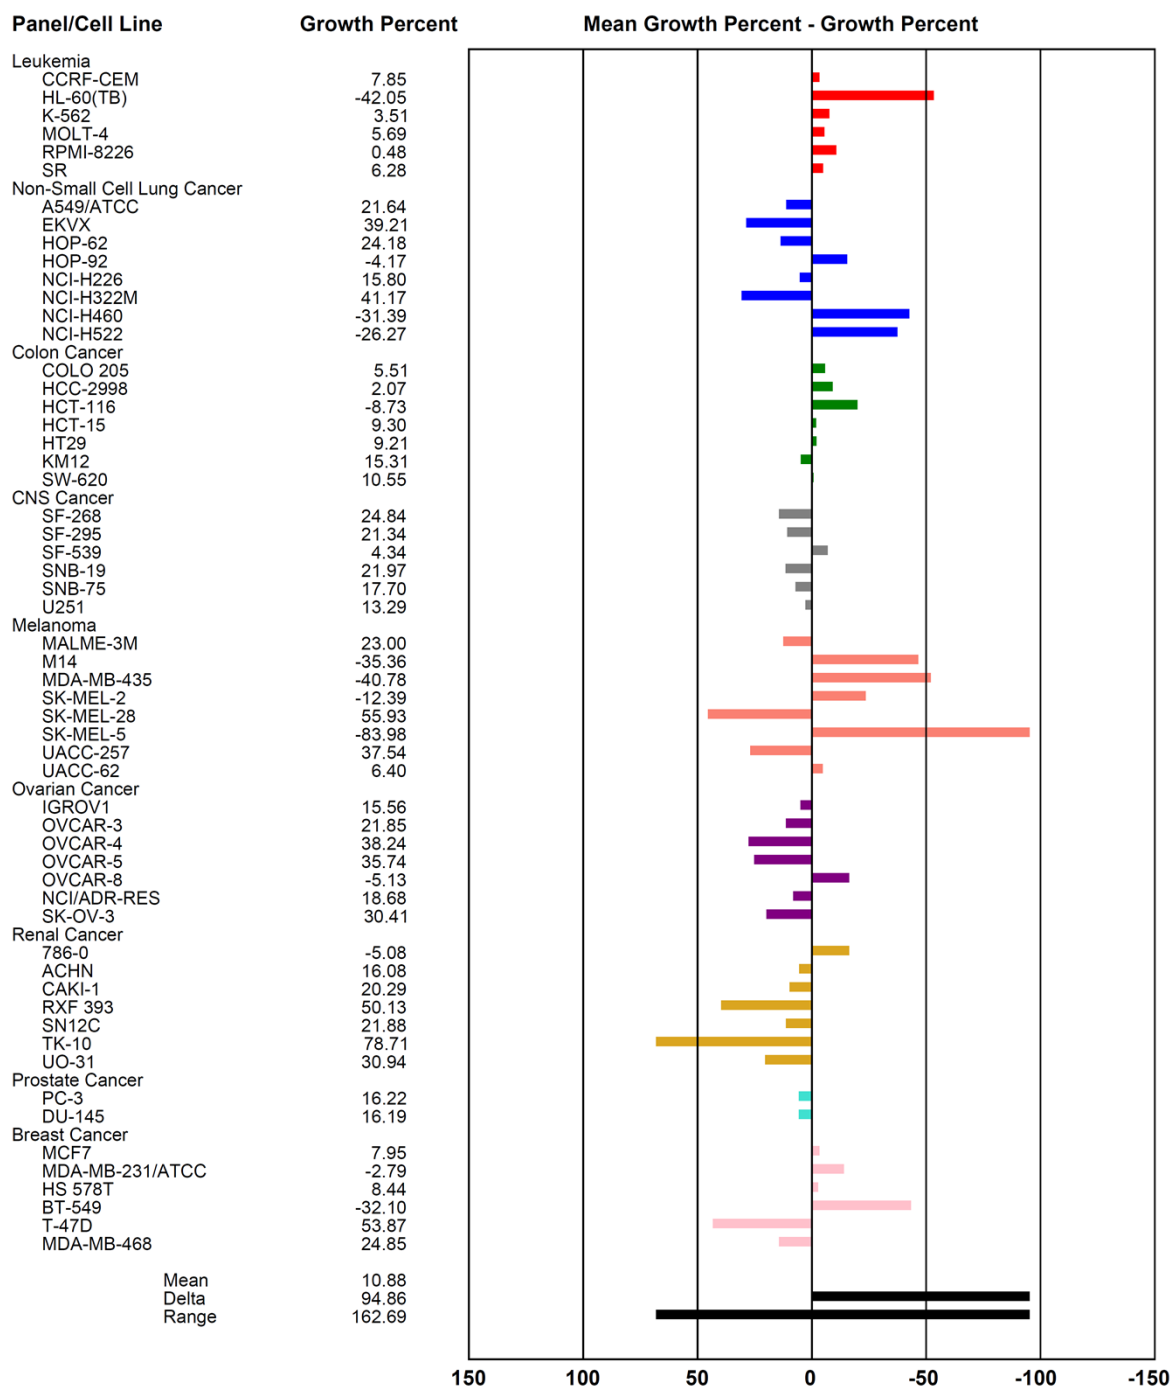

Compound 5g

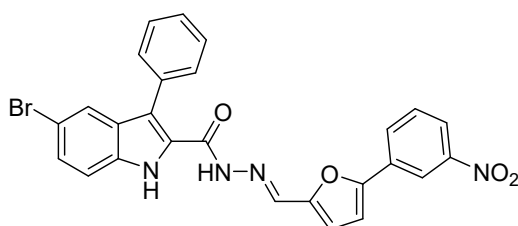

Developmental Therapeutics Program

NSC: D-837020 / 1

Conc: 1.00E-5 Molar

Test Date: Mar 28, 2022

One Dose Mean Graph

Experiment ID: 2203OS96

Report Date: Apr 16, 2022

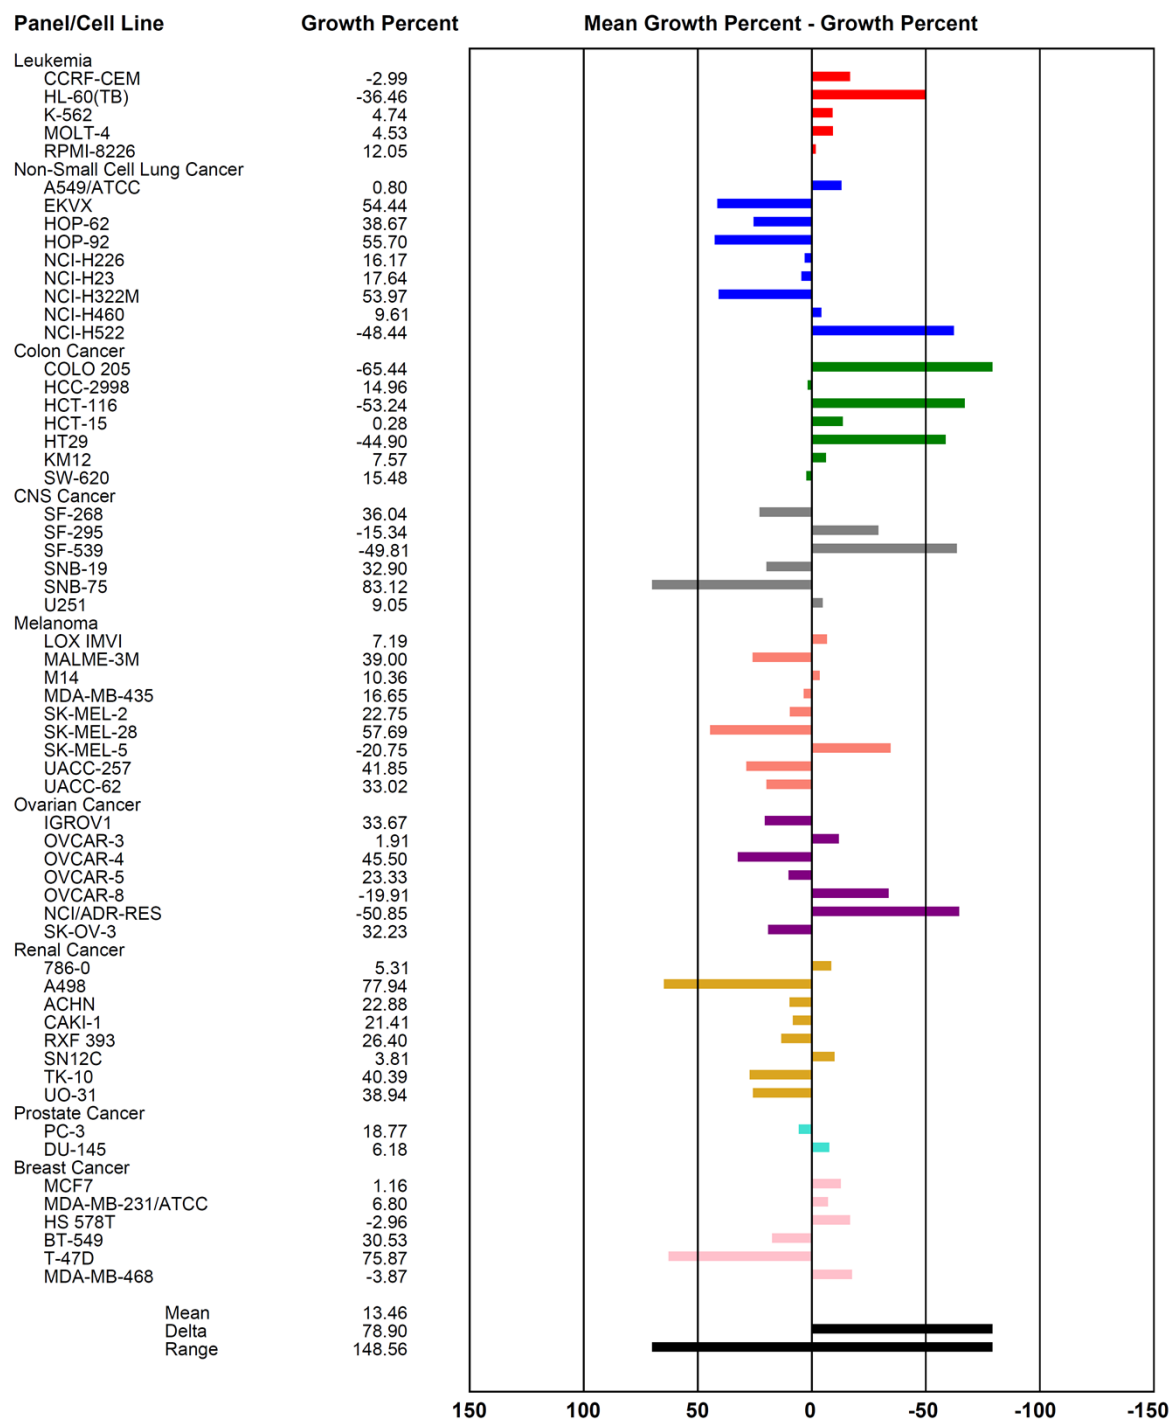

# Compound 5h

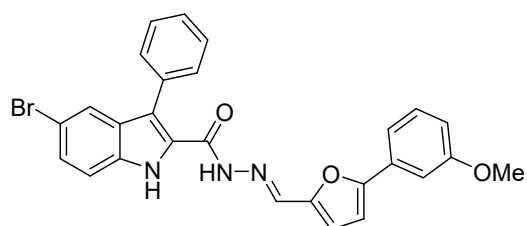

## Developmental Therapeutics Program

NSC: D-837022 / 1

Conc: 1.00E-5 Molar

Test Date: Mar 28, 2022

## One Dose Mean Graph

Experiment ID: 2203OS96

Report Date: Apr 16, 2022

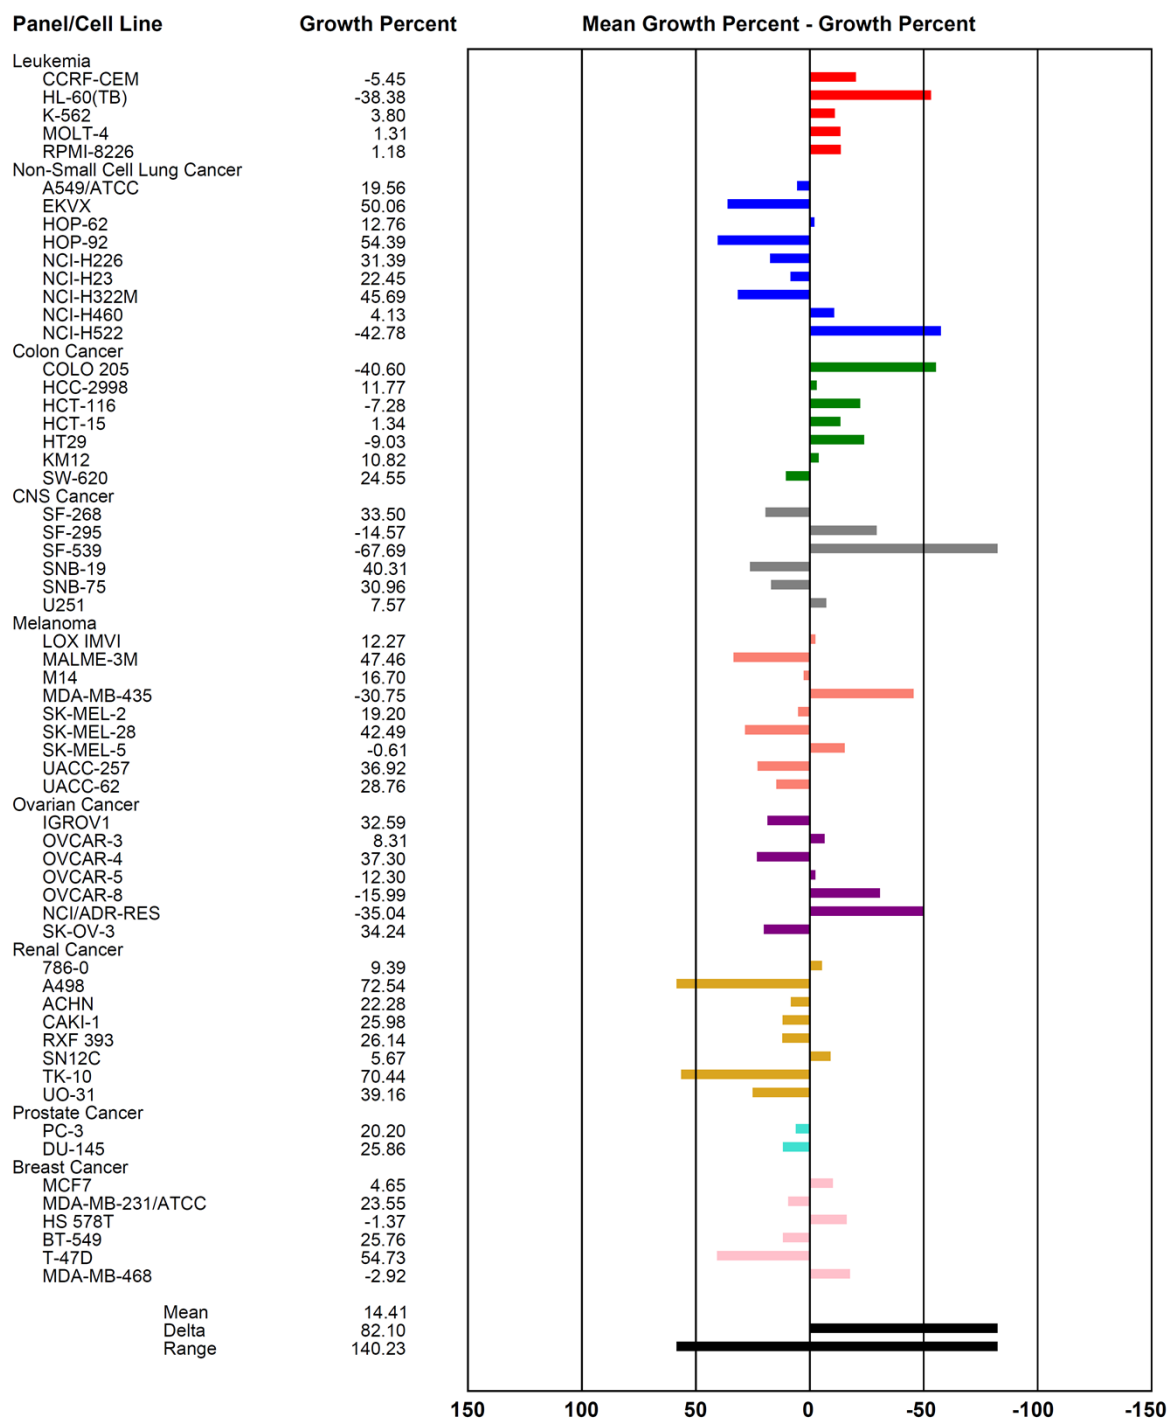

Compound 5i

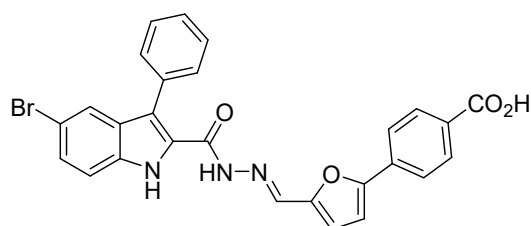

Developmental Therapeutics Program

NSC: D-838297 / 1

Conc: 1.00E-5 Molar

Test Date: May 23, 2022

One Dose Mean Graph

Experiment ID: 2205OS30

Report Date: Jun 26, 2022

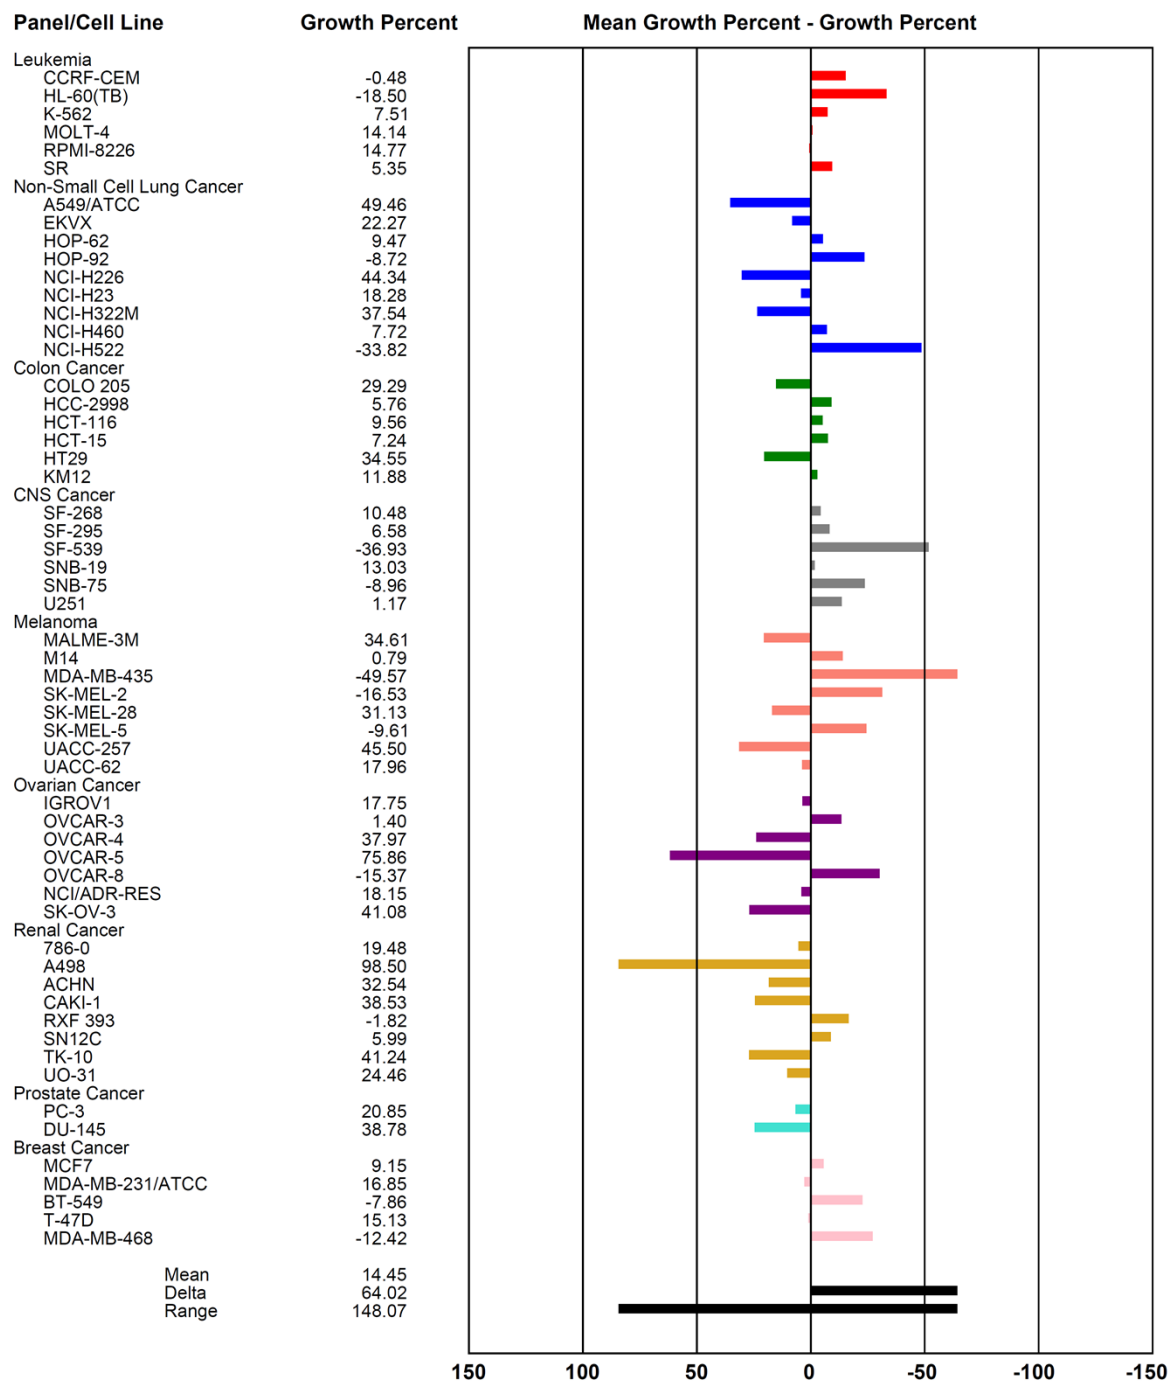

Compound 5j

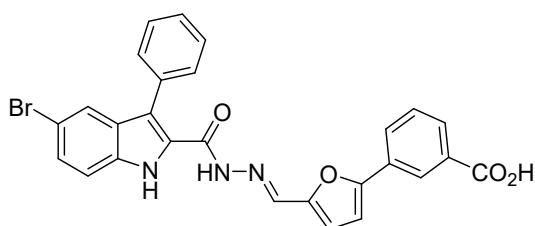

Developmental Therapeutics Program

NSC: D-838298 / 1

Conc: 1.00E-5 Molar

Test Date: May 23, 2022

One Dose Mean Graph

Experiment ID: 2205OS30

Report Date: Jun 26, 2022

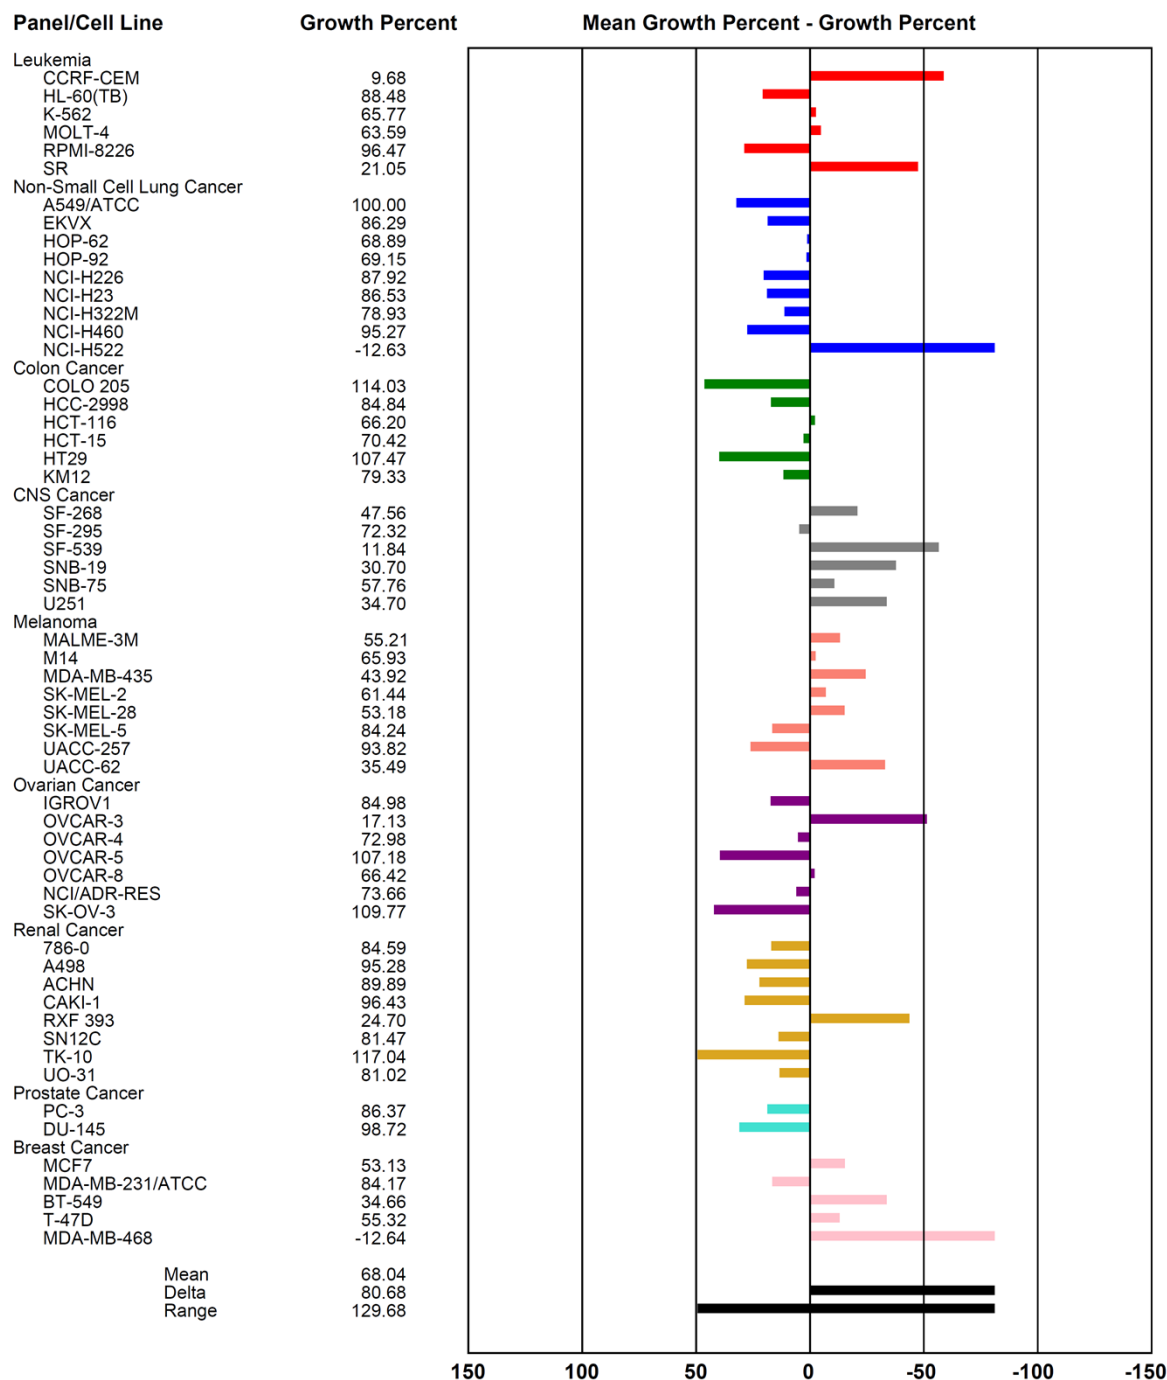



Compound 5k

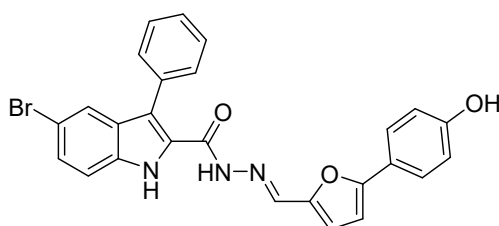

Developmental Therapeutics Program

NSC: D-838304 / 1

Conc: 1.00E-5 Molar

Test Date: May 23, 2022

One Dose Mean Graph

Experiment ID: 2205OS30

Report Date: Jun 26, 2022

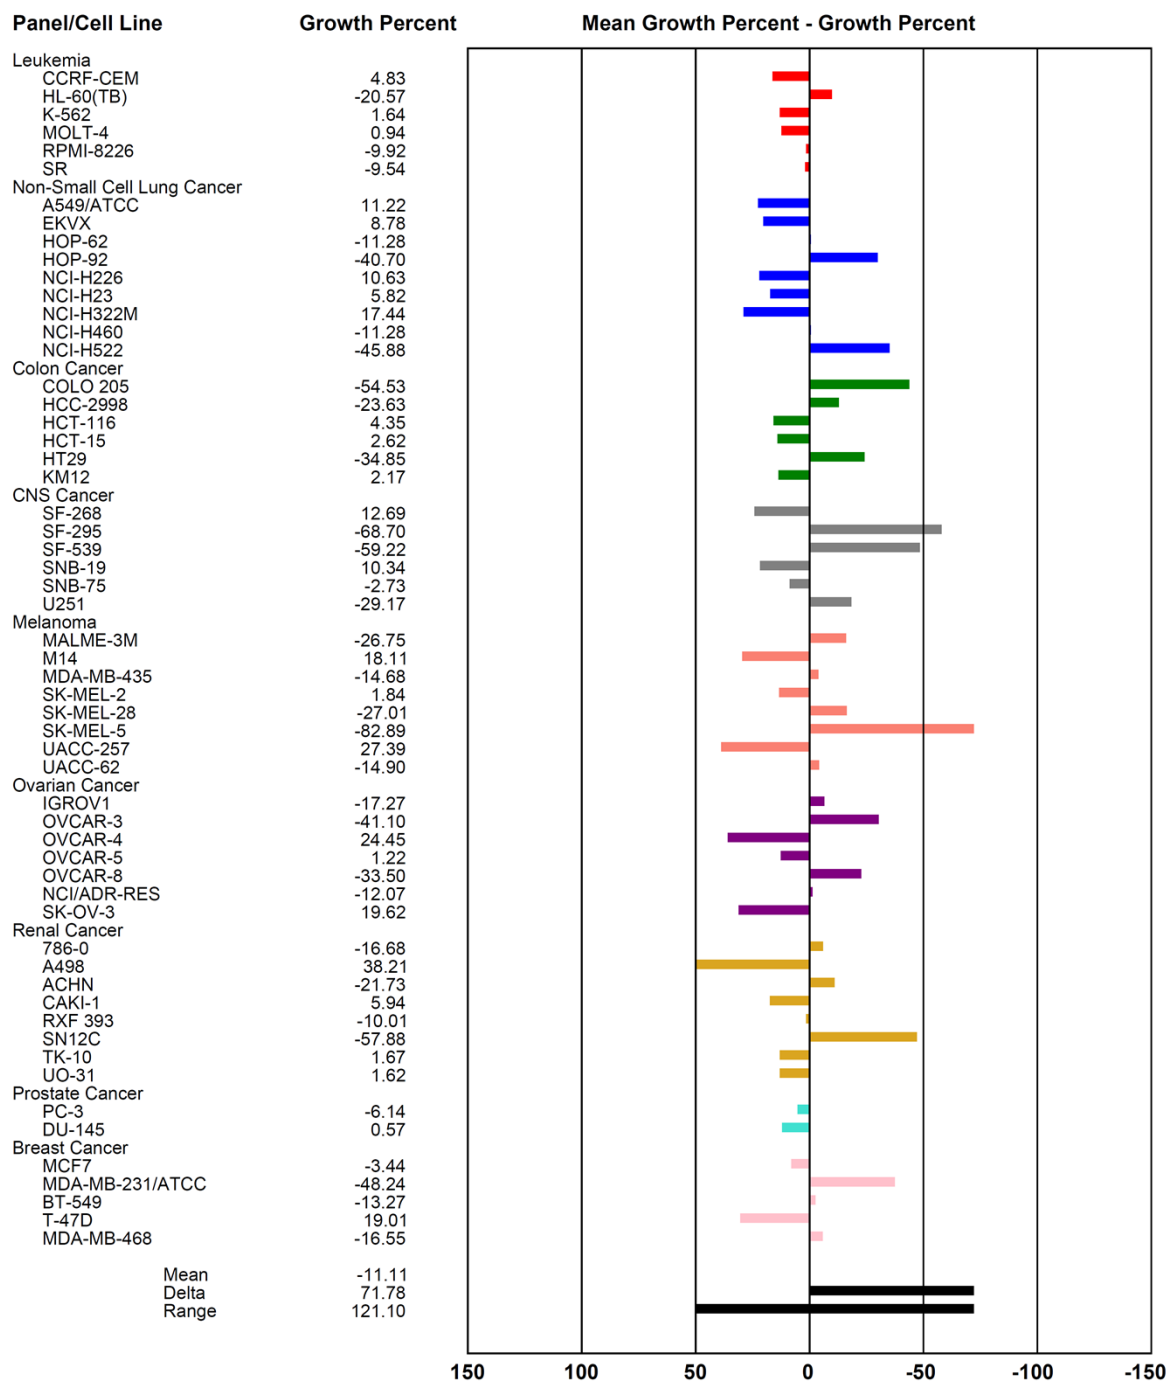

# Compound 6a

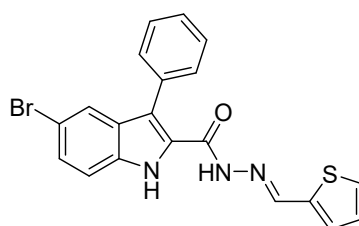

## Developmental Therapeutics Program

NSC: D-832474 / 1

Conc: 1.00E-5 Molar

Test Date: Aug 30, 2021

## One Dose Mean Graph

Experiment ID: 2108OS84

Report Date: Jan 25, 2022

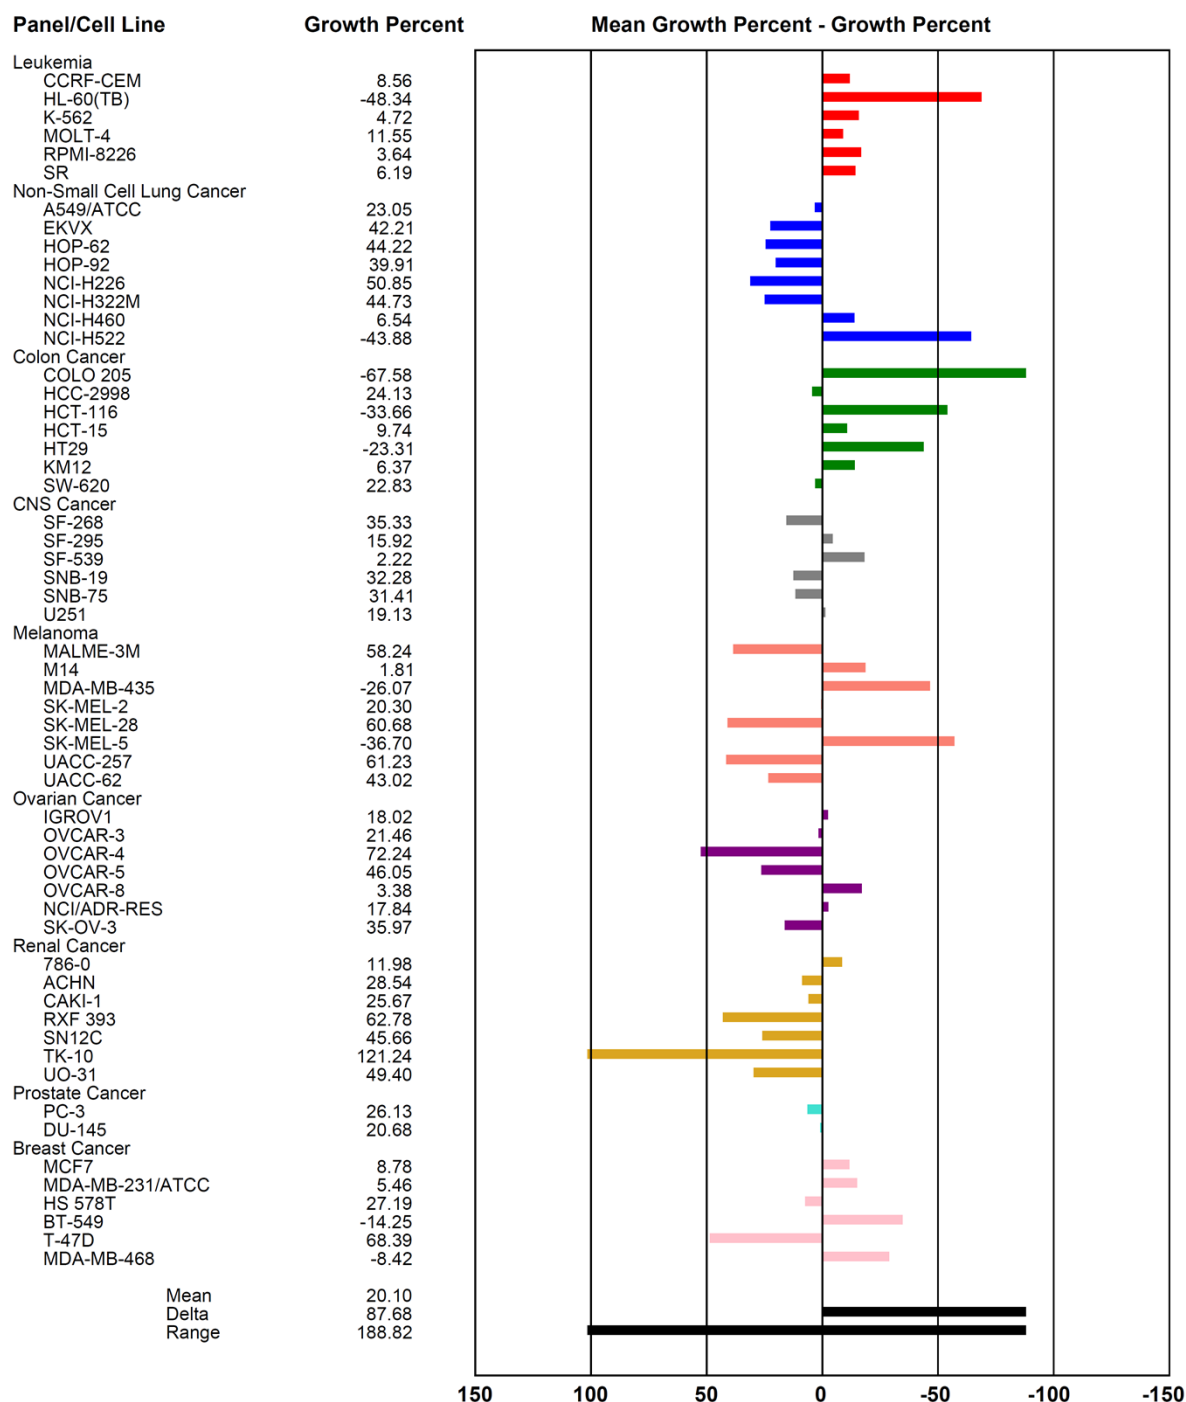

# Compound 6b

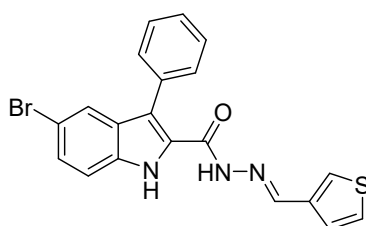

## Developmental Therapeutics Program

NSC: D-834623 / 1

Conc: 1.00E-5 Molar

Test Date: Feb 07, 2022

## One Dose Mean Graph

Experiment ID: 2202OS59

Report Date: Mar 02, 2022

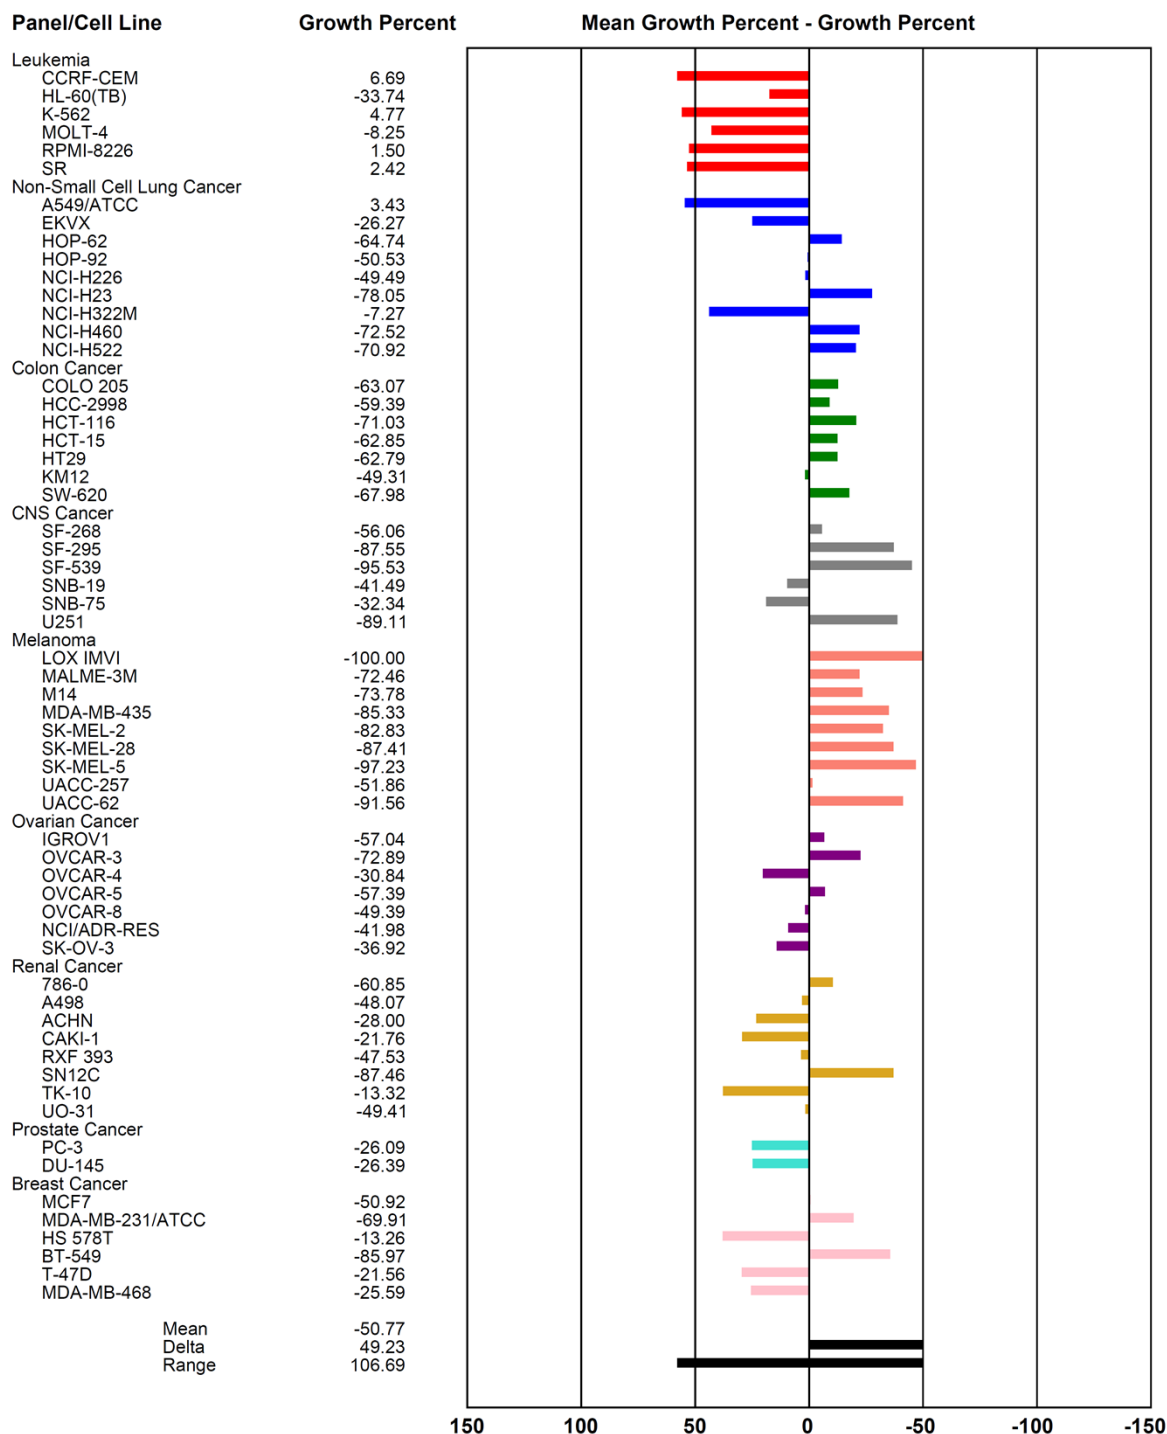

Compound 6c

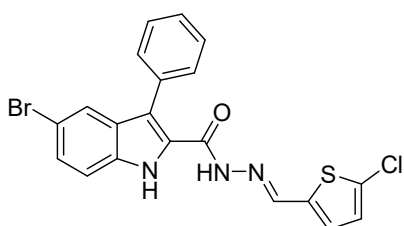

Developmental Therapeutics Program

NSC: D-832475 / 1

Conc: 1.00E-5 Molar

Test Date: Aug 30, 2021

One Dose Mean Graph

Experiment ID: 2108OS84

Report Date: Jan 25, 2022

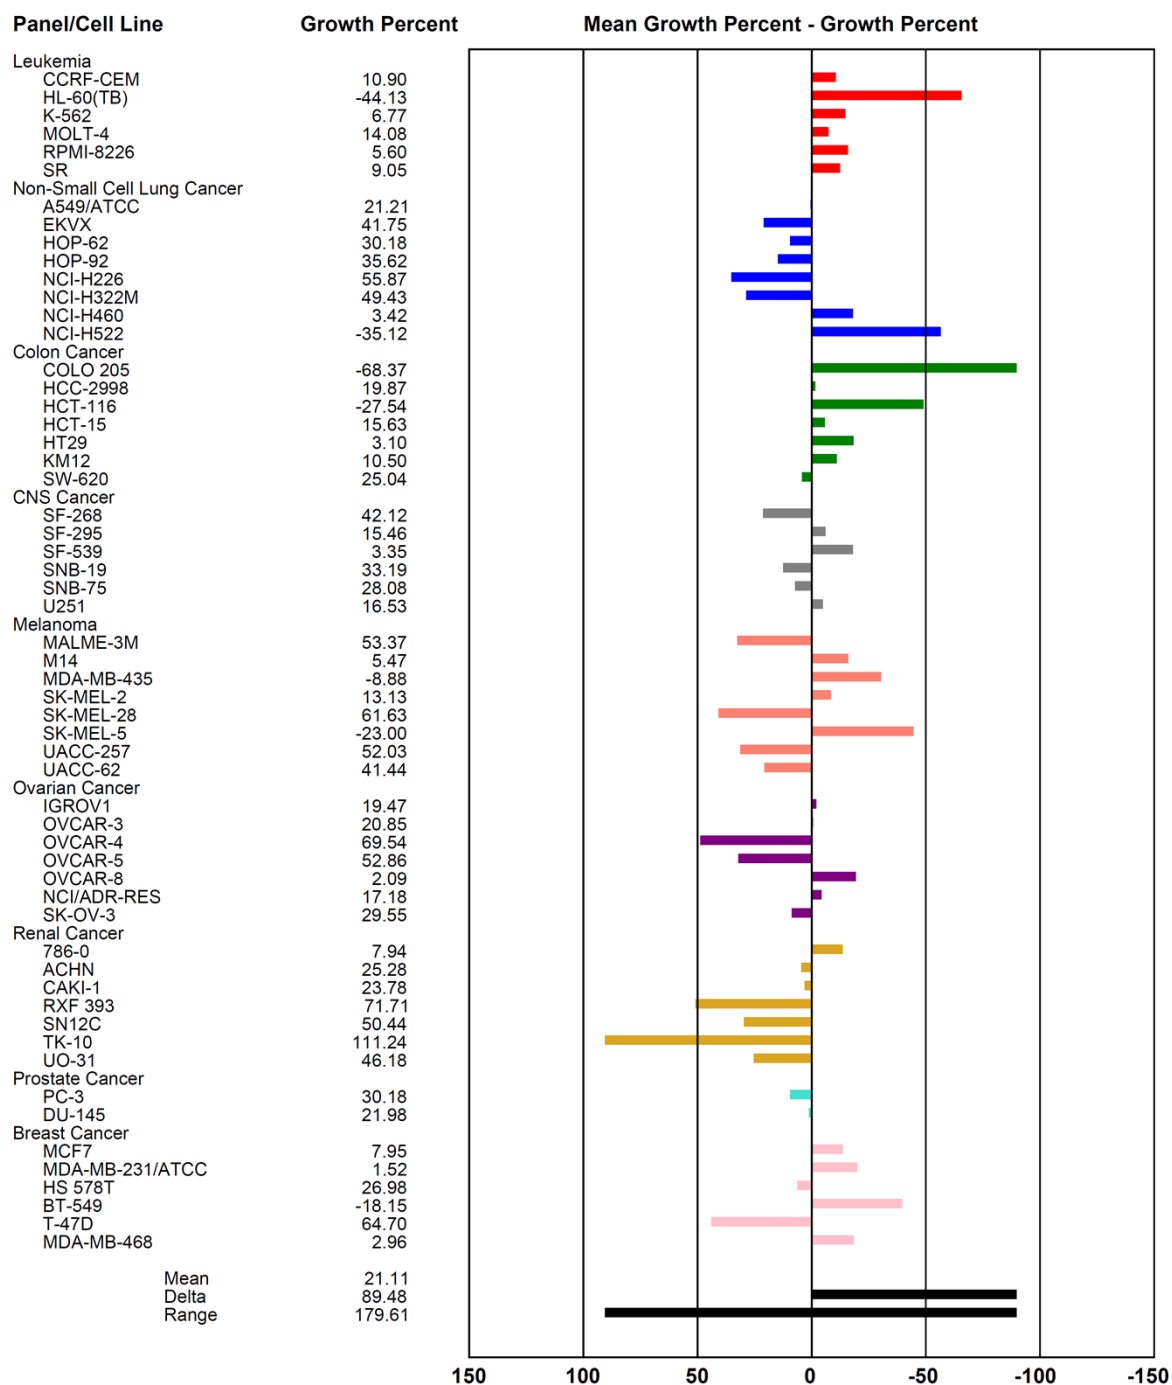

# Compound 6d

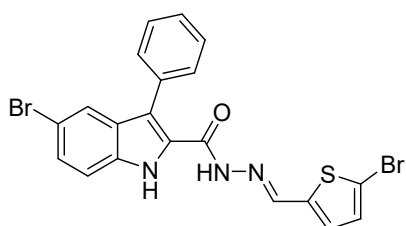

## Developmental Therapeutics Program

NSC: D-832476 / 1

Conc: 1.00E-5 Molar

Test Date: Aug 30, 2021

## One Dose Mean Graph

Experiment ID: 2108OS84

Report Date: Jan 25, 2022

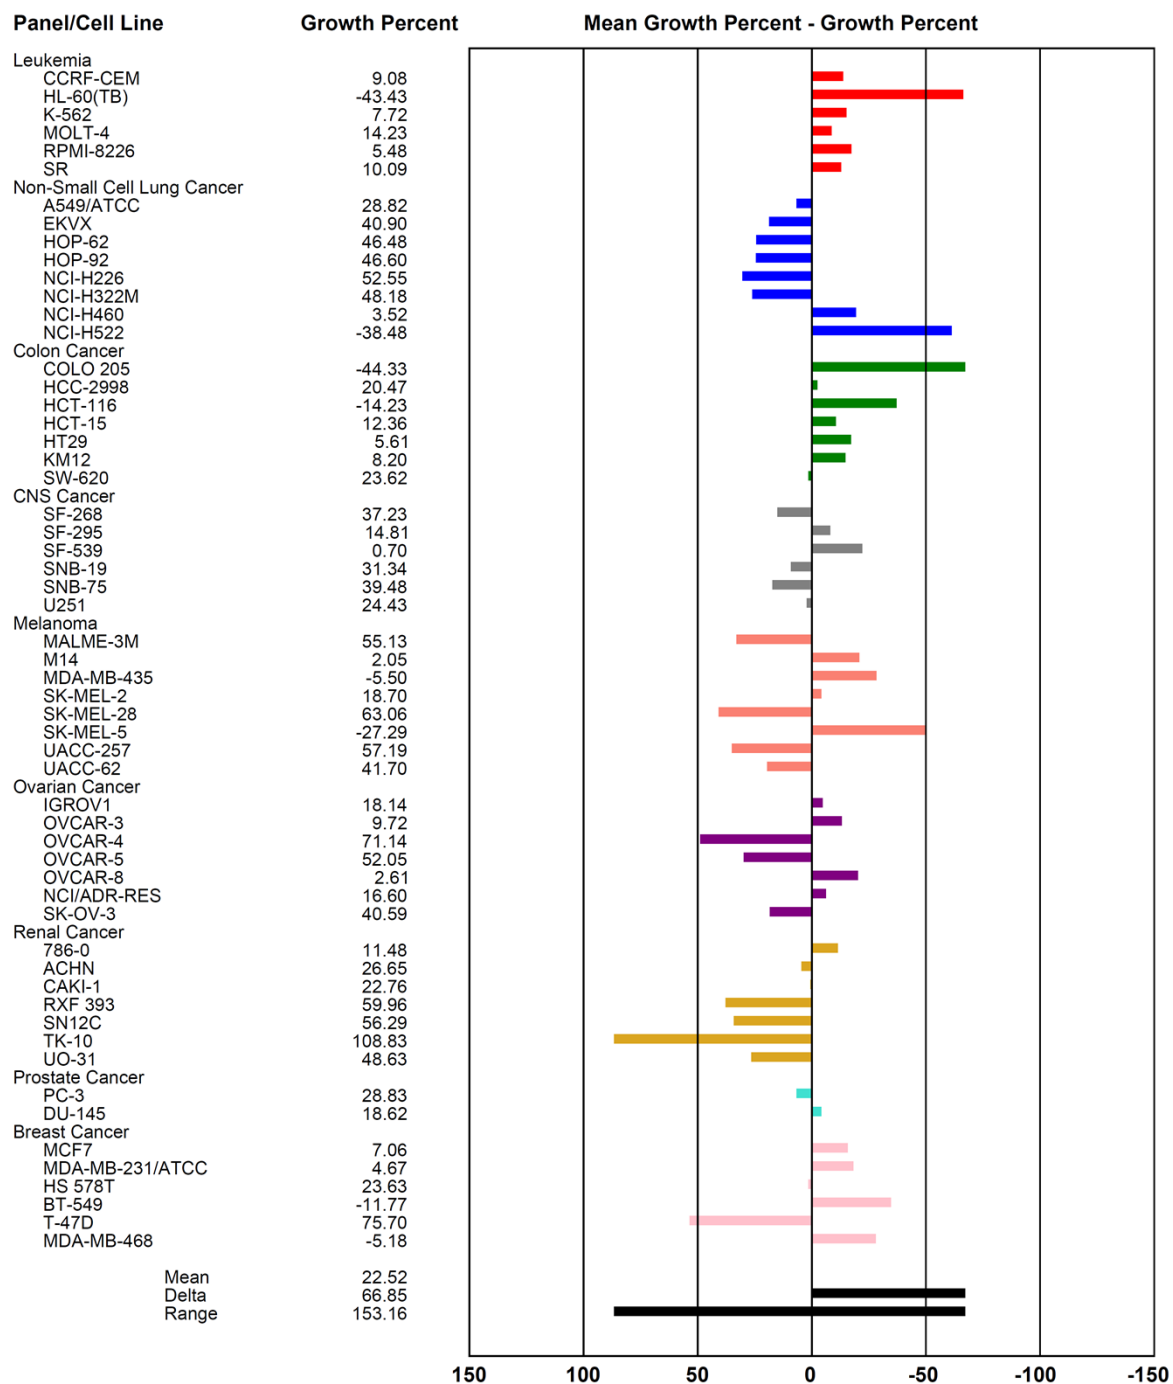

Compound 6e

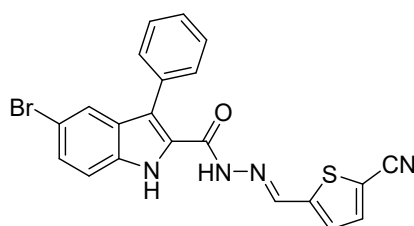

Developmental Therapeutics Program

NSC: D-832477 / 1

Conc: 1.00E-5 Molar

Test Date: Aug 30, 2021

One Dose Mean Graph

Experiment ID: 2108OS84

Report Date: Jan 25, 2022

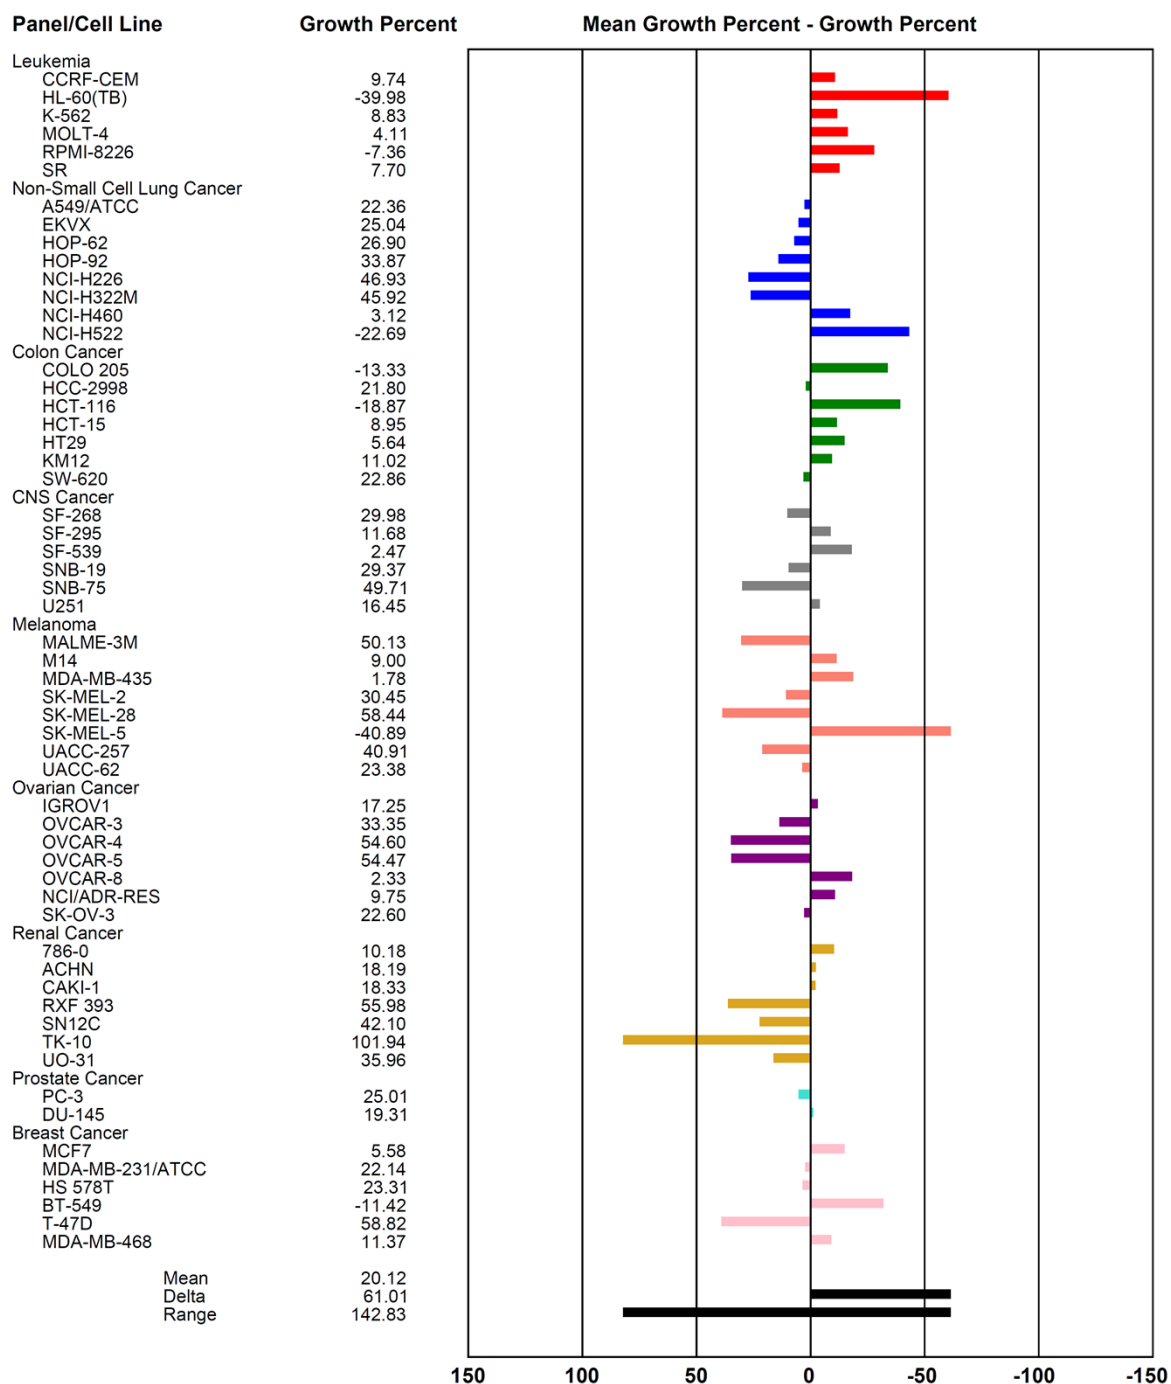

# Compound 6f

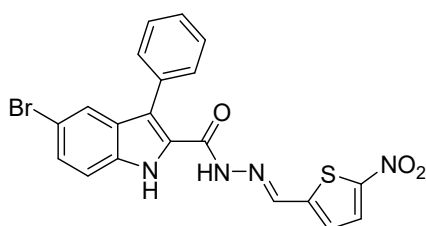

## Developmental Therapeutics Program One Dose Mean Graph

NSC: D-832479 / 1

Conc: 1.00E-5 Molar

Test Date: Aug 30, 2021

Experiment ID: 2108OS84

Report Date: Jan 25, 2022

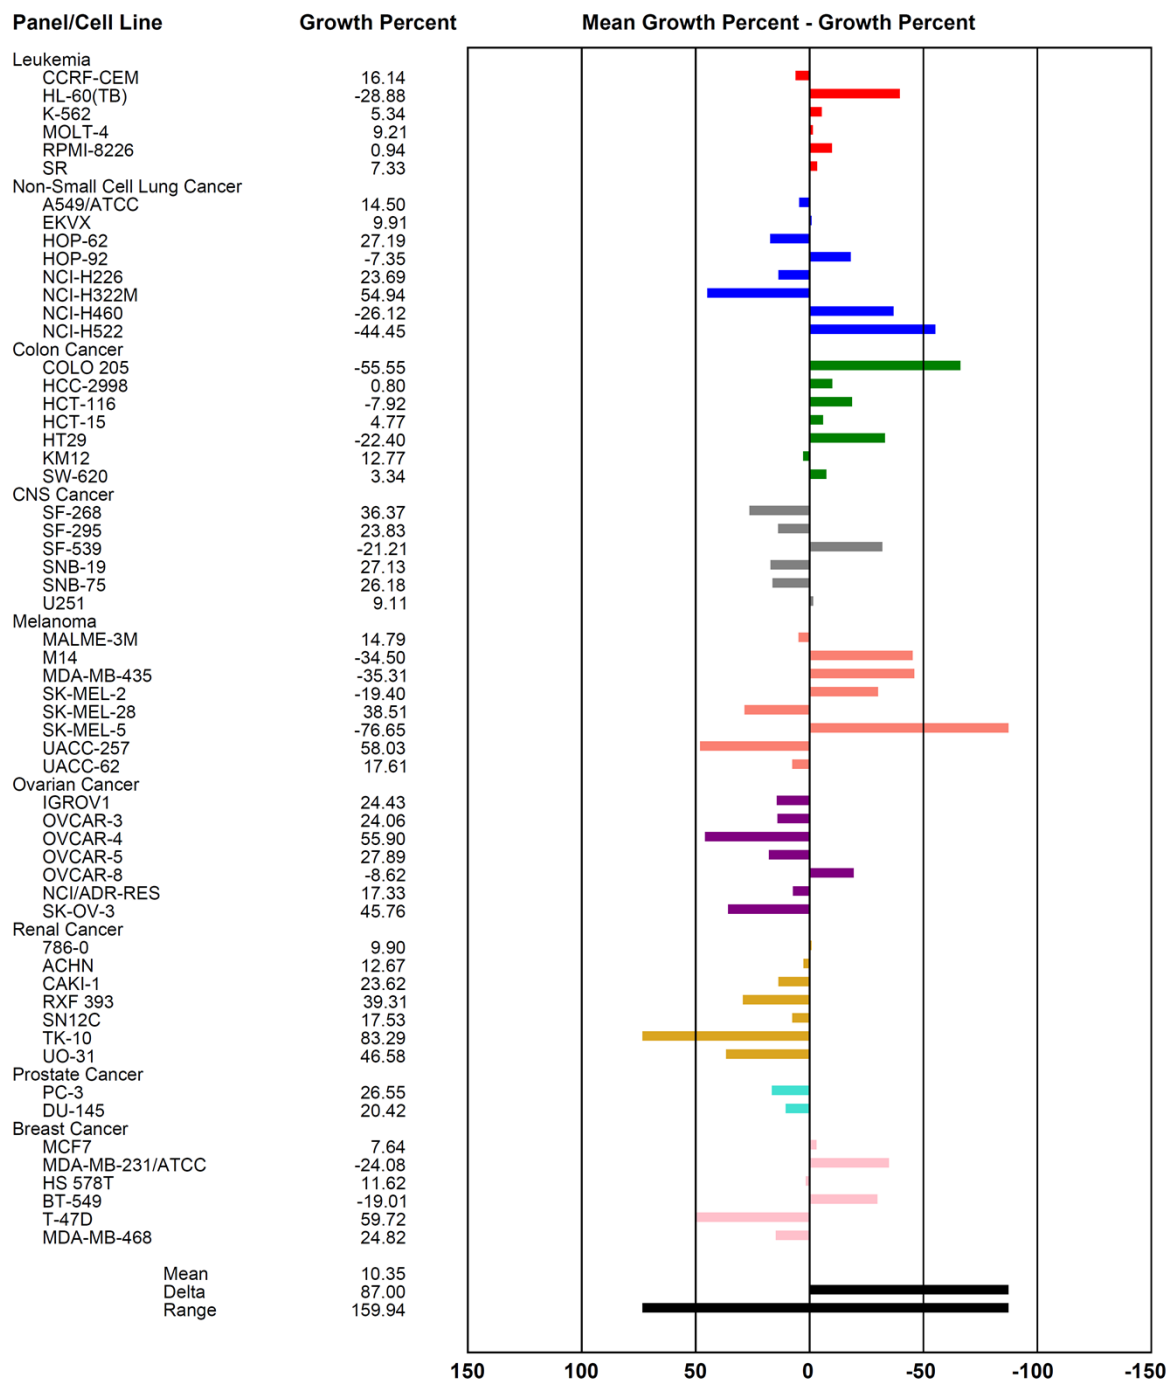

Compound 6g

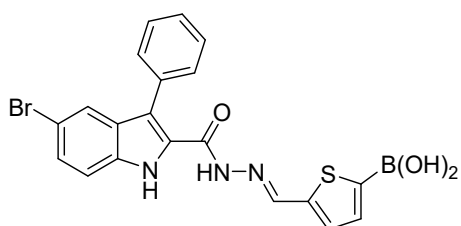

**Developmental Therapeutics Program**  
**One Dose Mean Graph**

|                         |                     |                           |
|-------------------------|---------------------|---------------------------|
| NSC: D-834627 / 1       | Conc: 1.00E-5 Molar | Test Date: Feb 07, 2022   |
| Experiment ID: 2202OS59 |                     | Report Date: Mar 02, 2022 |

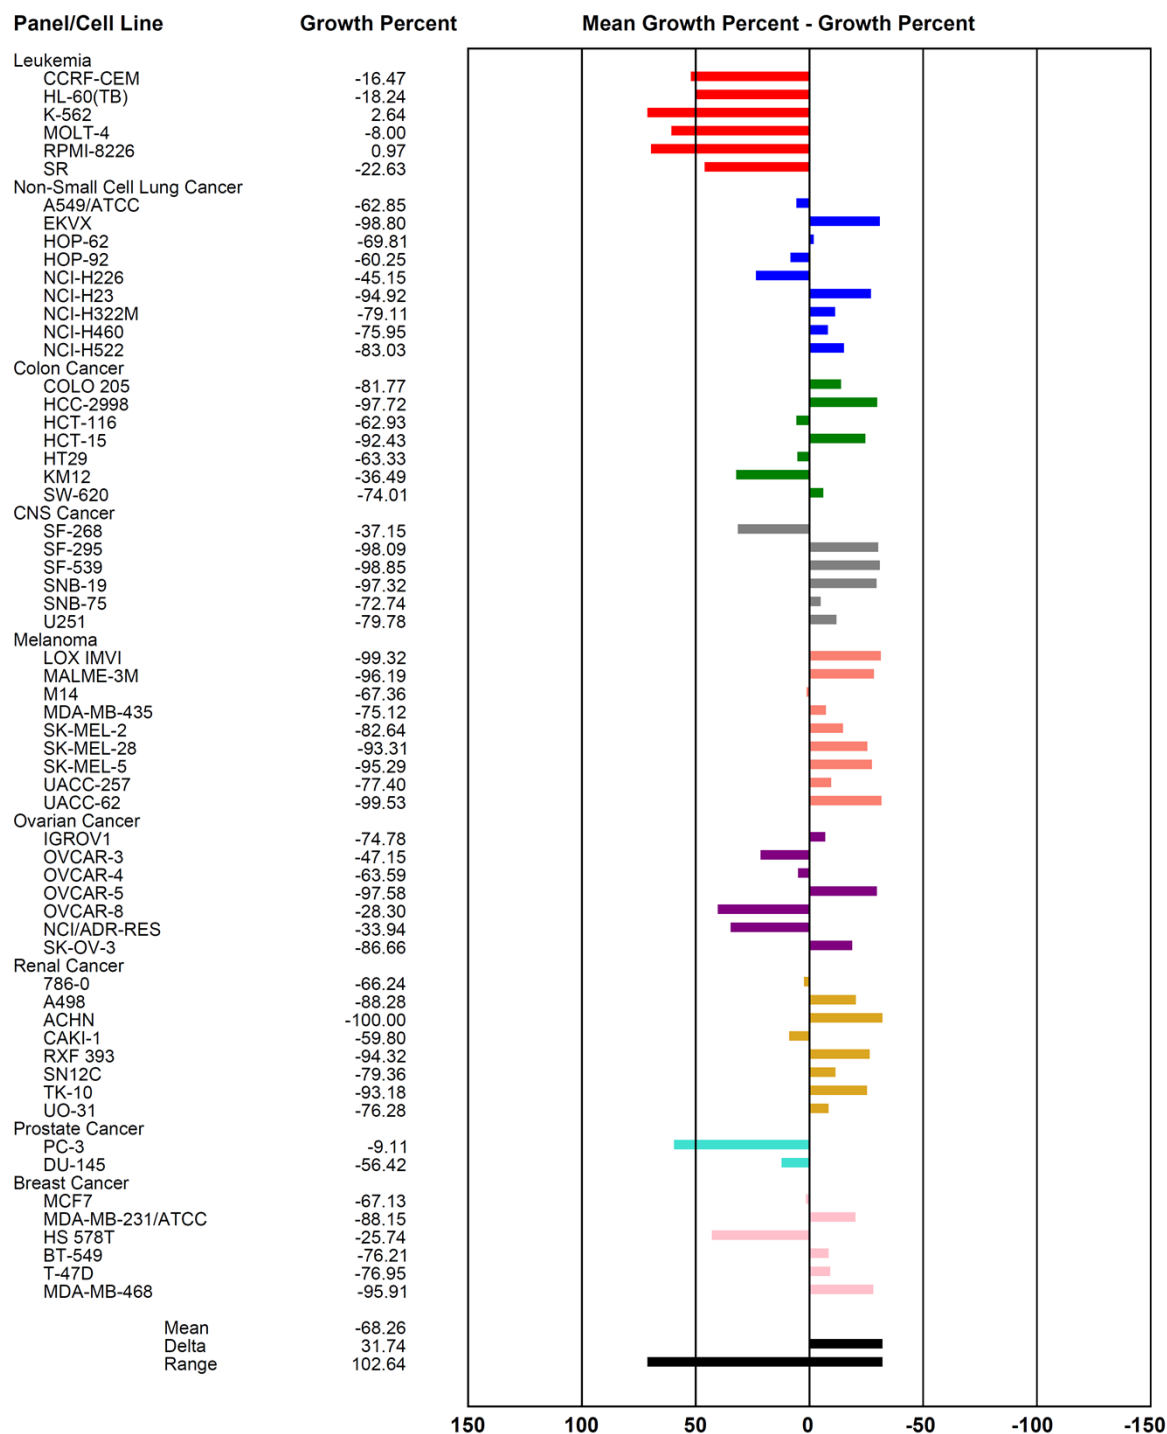



# Compound 6h

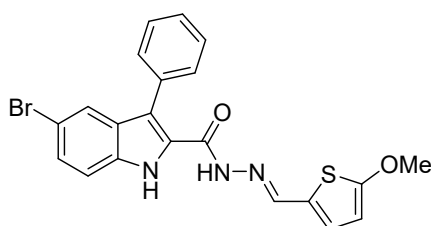

## Developmental Therapeutics Program

NSC: D-832478 / 1

Conc: 1.00E-5 Molar

Test Date: Aug 30, 2021

## One Dose Mean Graph

Experiment ID: 2108OS84

Report Date: Jan 25, 2022

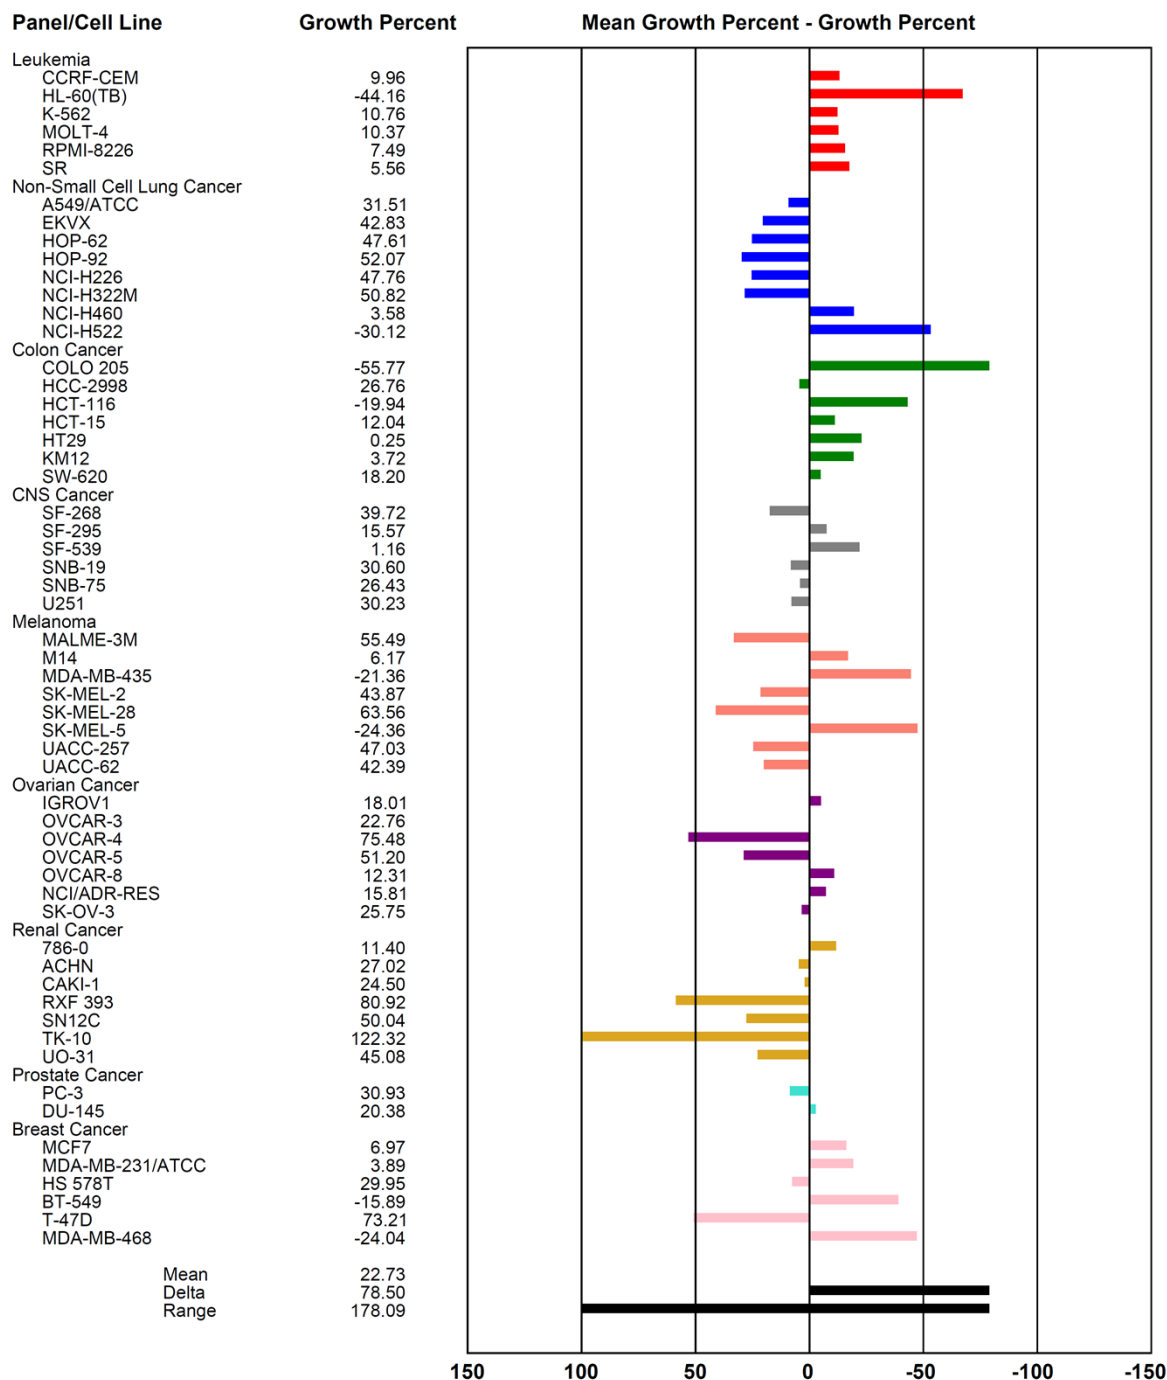

# Compound 6i

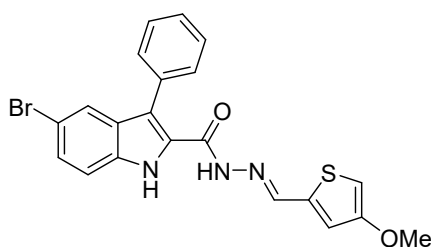

## Developmental Therapeutics Program One Dose Mean Graph

|                         |                     |                           |
|-------------------------|---------------------|---------------------------|
| NSC: D-837015 / 1       | Conc: 1.00E-5 Molar | Test Date: Mar 28, 2022   |
| Experiment ID: 2203OS96 |                     | Report Date: Apr 16, 2022 |

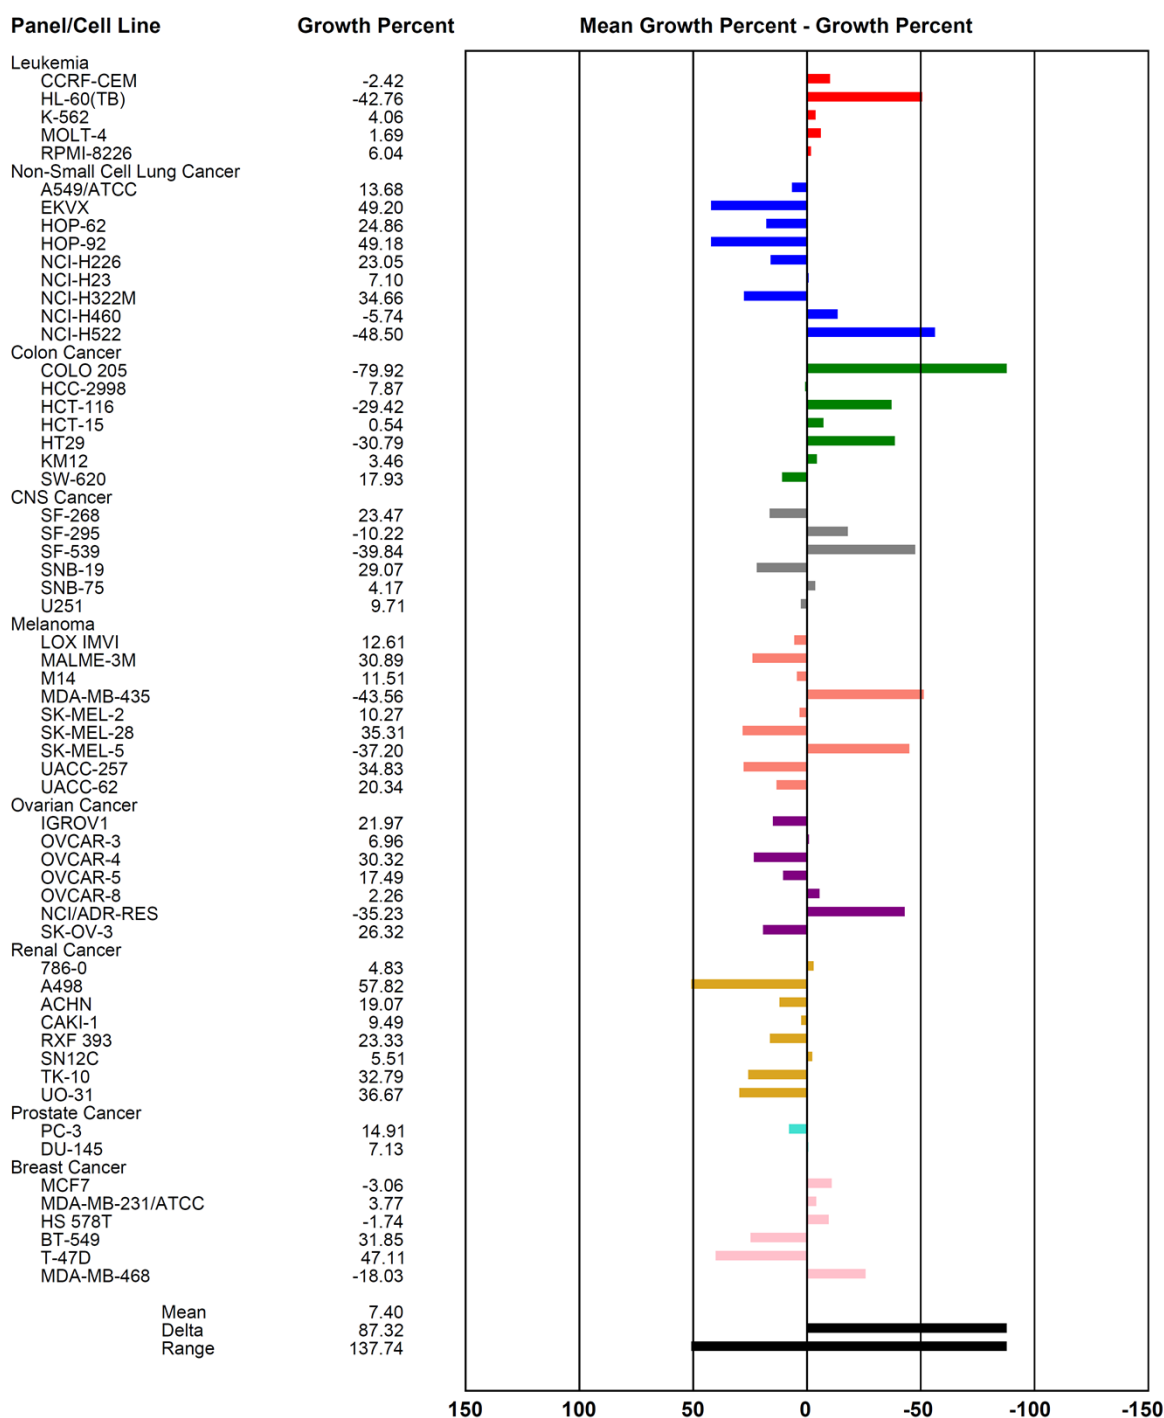

Compound 6j

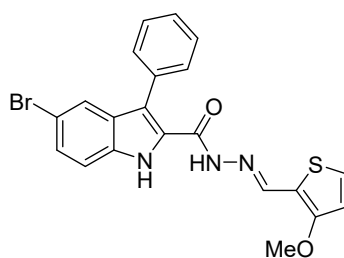

Developmental Therapeutics Program

NSC: D-837016 / 1

Conc: 1.00E-5 Molar

Test Date: Mar 28, 2022

One Dose Mean Graph

Experiment ID: 2203OS96

Report Date: Apr 16, 2022

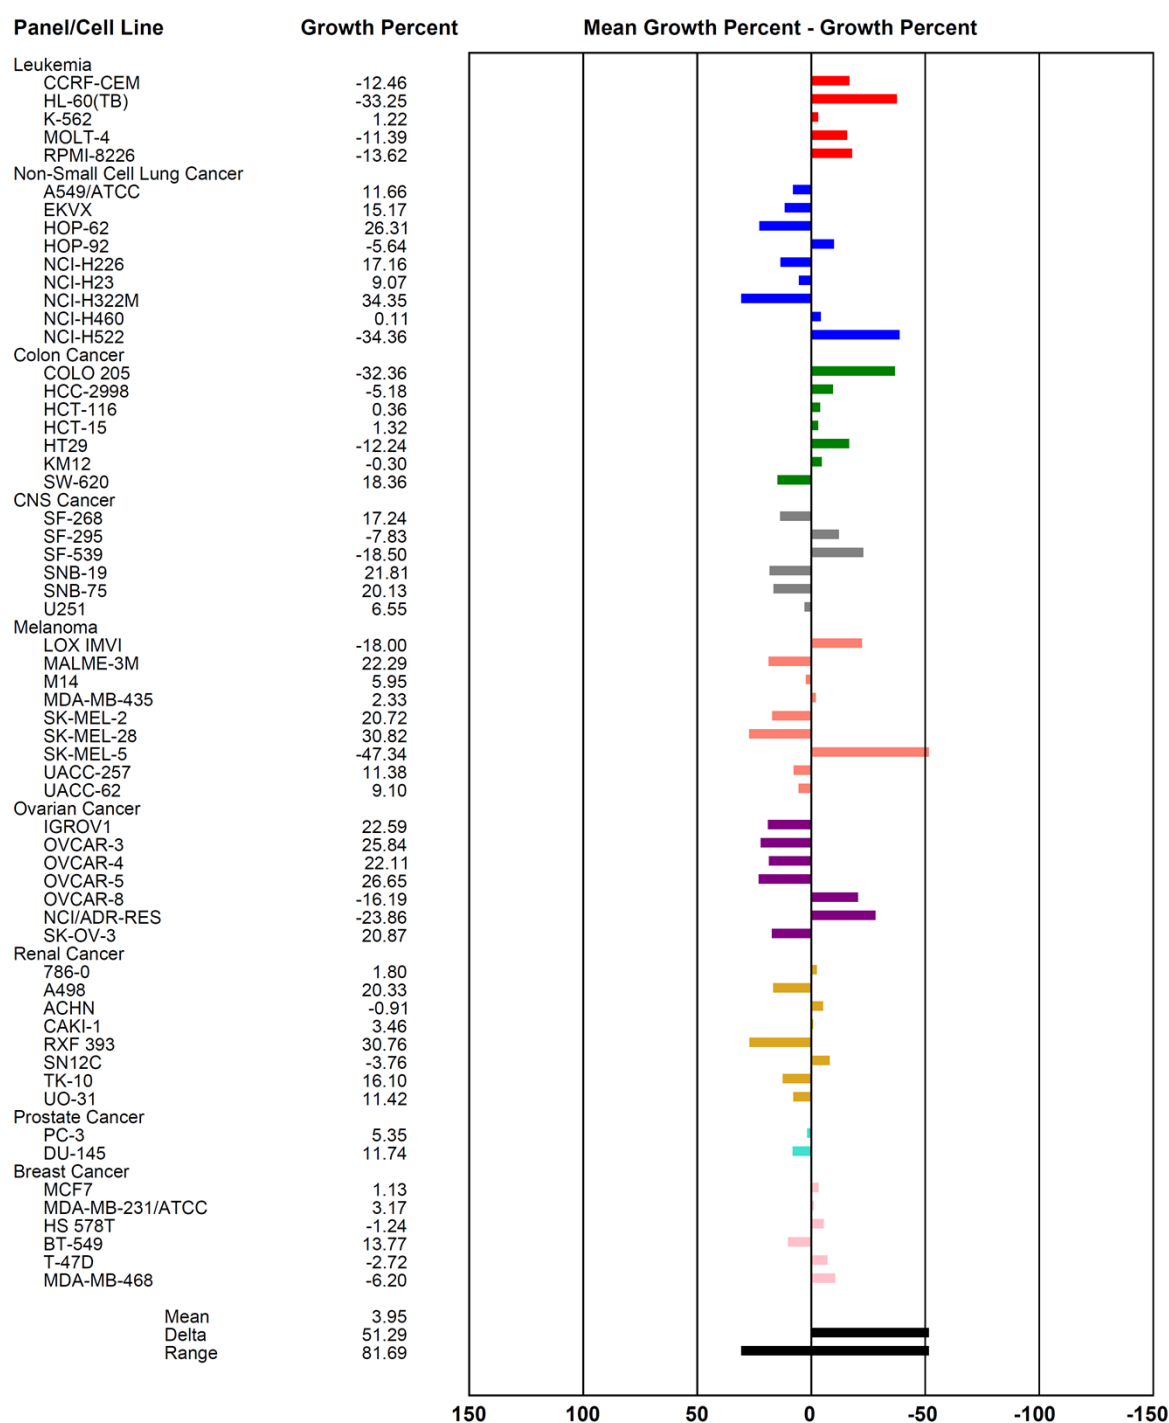

Compound 6k

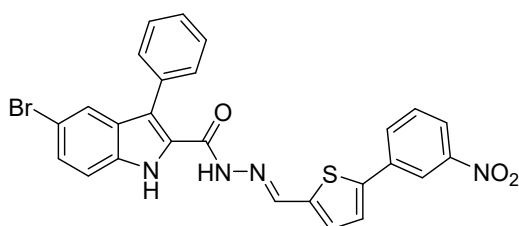

Developmental Therapeutics Program

NSC: D-834624 / 1

Conc: 1.00E-5 Molar

Test Date: Feb 07, 2022

One Dose Mean Graph

Experiment ID: 2202OS59

Report Date: Mar 02, 2022

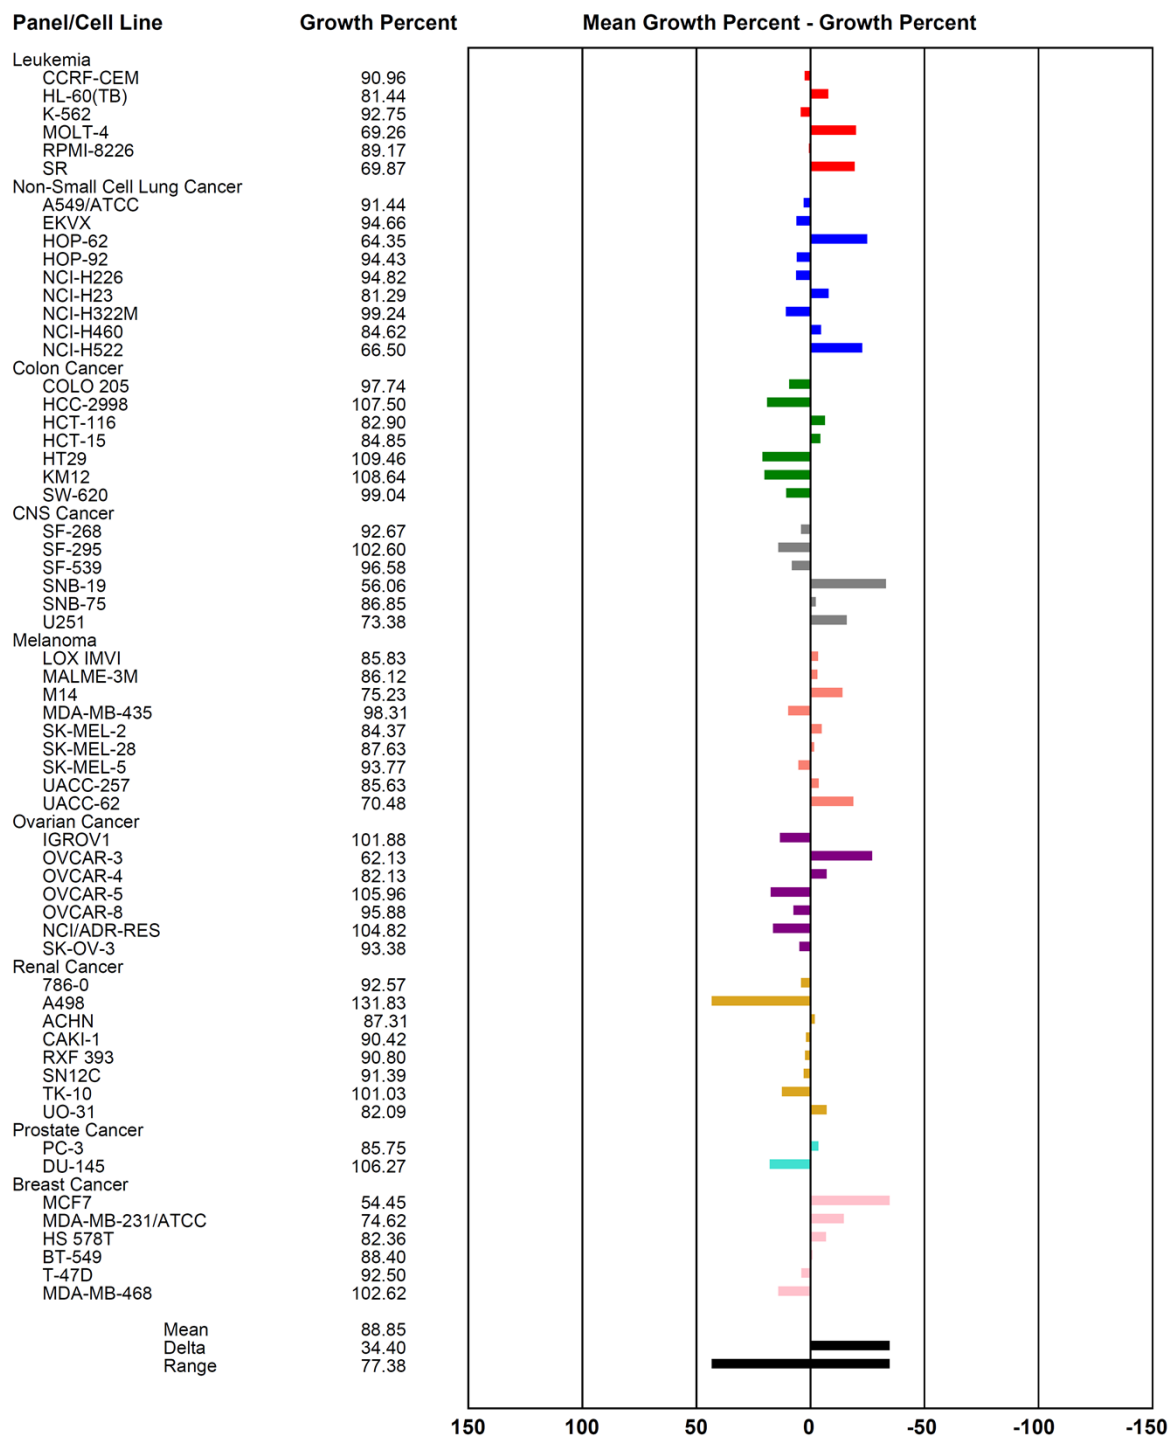

Compound 61

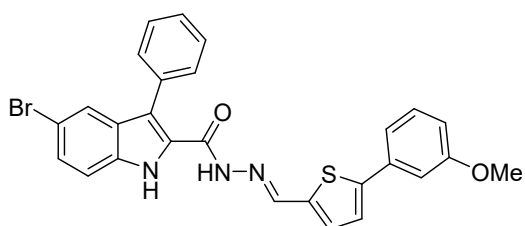

Developmental Therapeutics Program

NSC: D-834625 / 1

Conc: 1.00E-5 Molar

Test Date: Feb 07, 2022

One Dose Mean Graph

Experiment ID: 2202OS59

Report Date: Mar 02, 2022

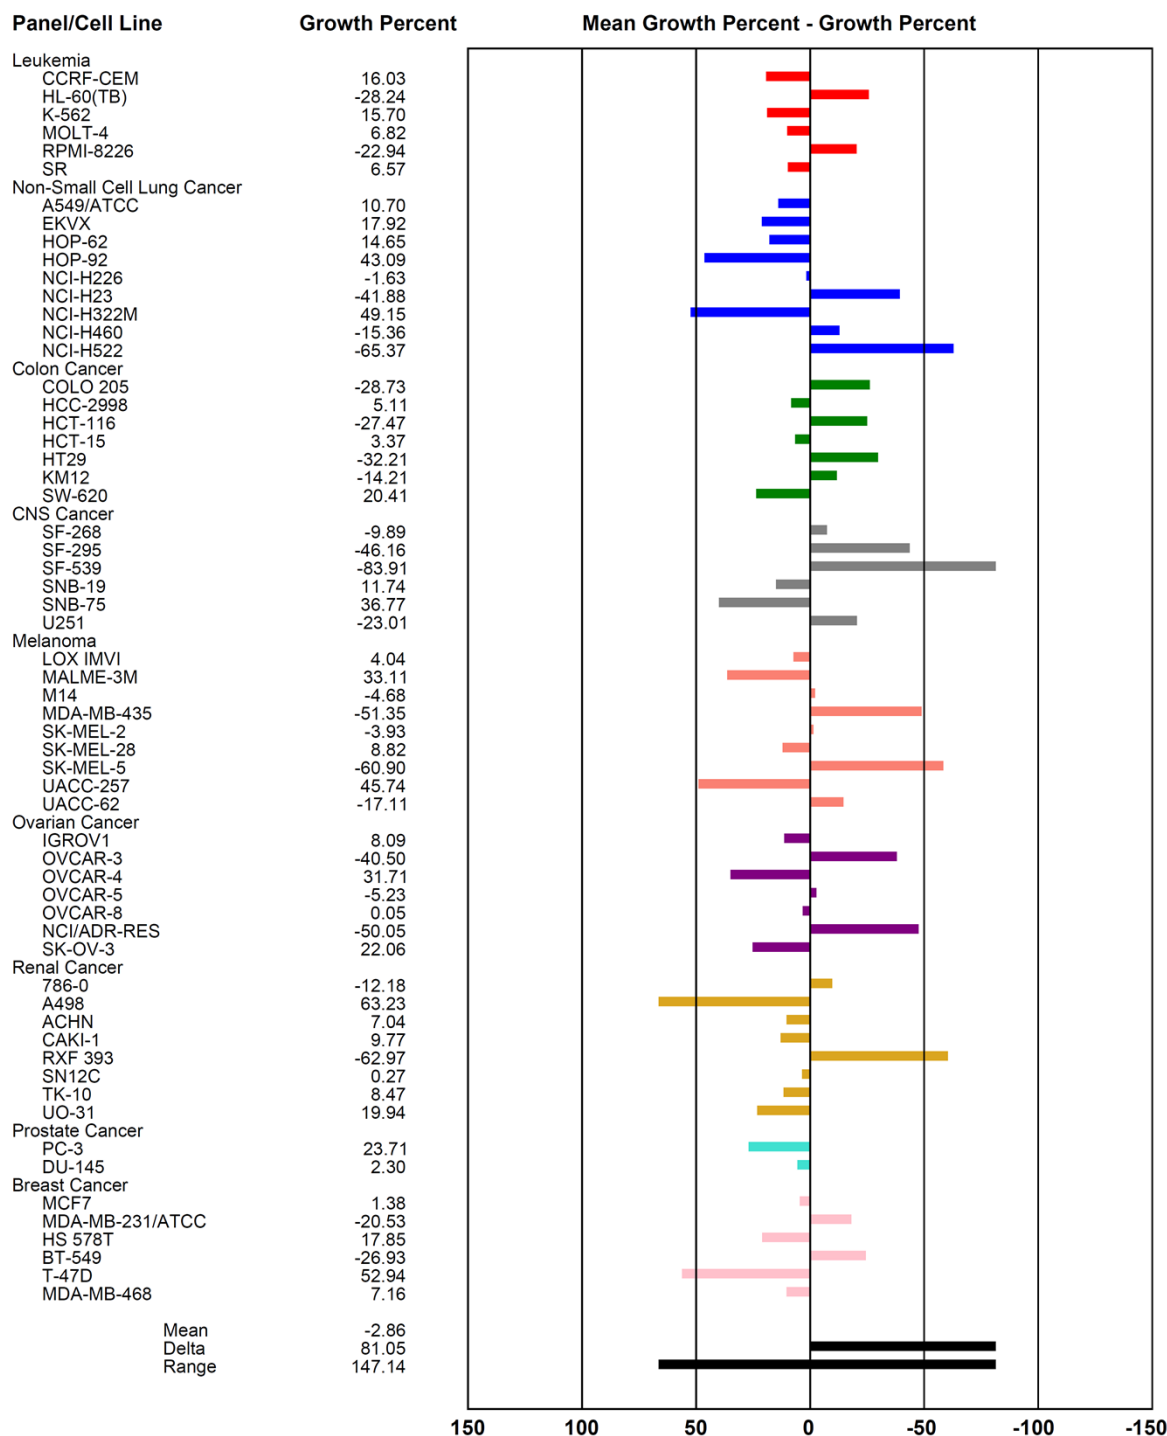

Compound 6m

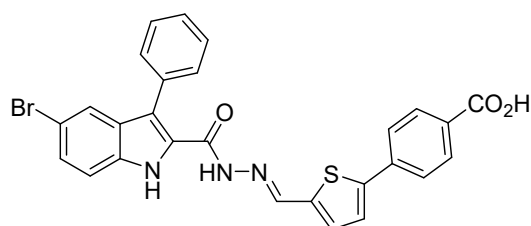

Developmental Therapeutics Program

NSC: D-838302 / 1

Conc: 1.00E-5 Molar

Test Date: May 23, 2022

One Dose Mean Graph

Experiment ID: 2205OS30

Report Date: Jun 26, 2022

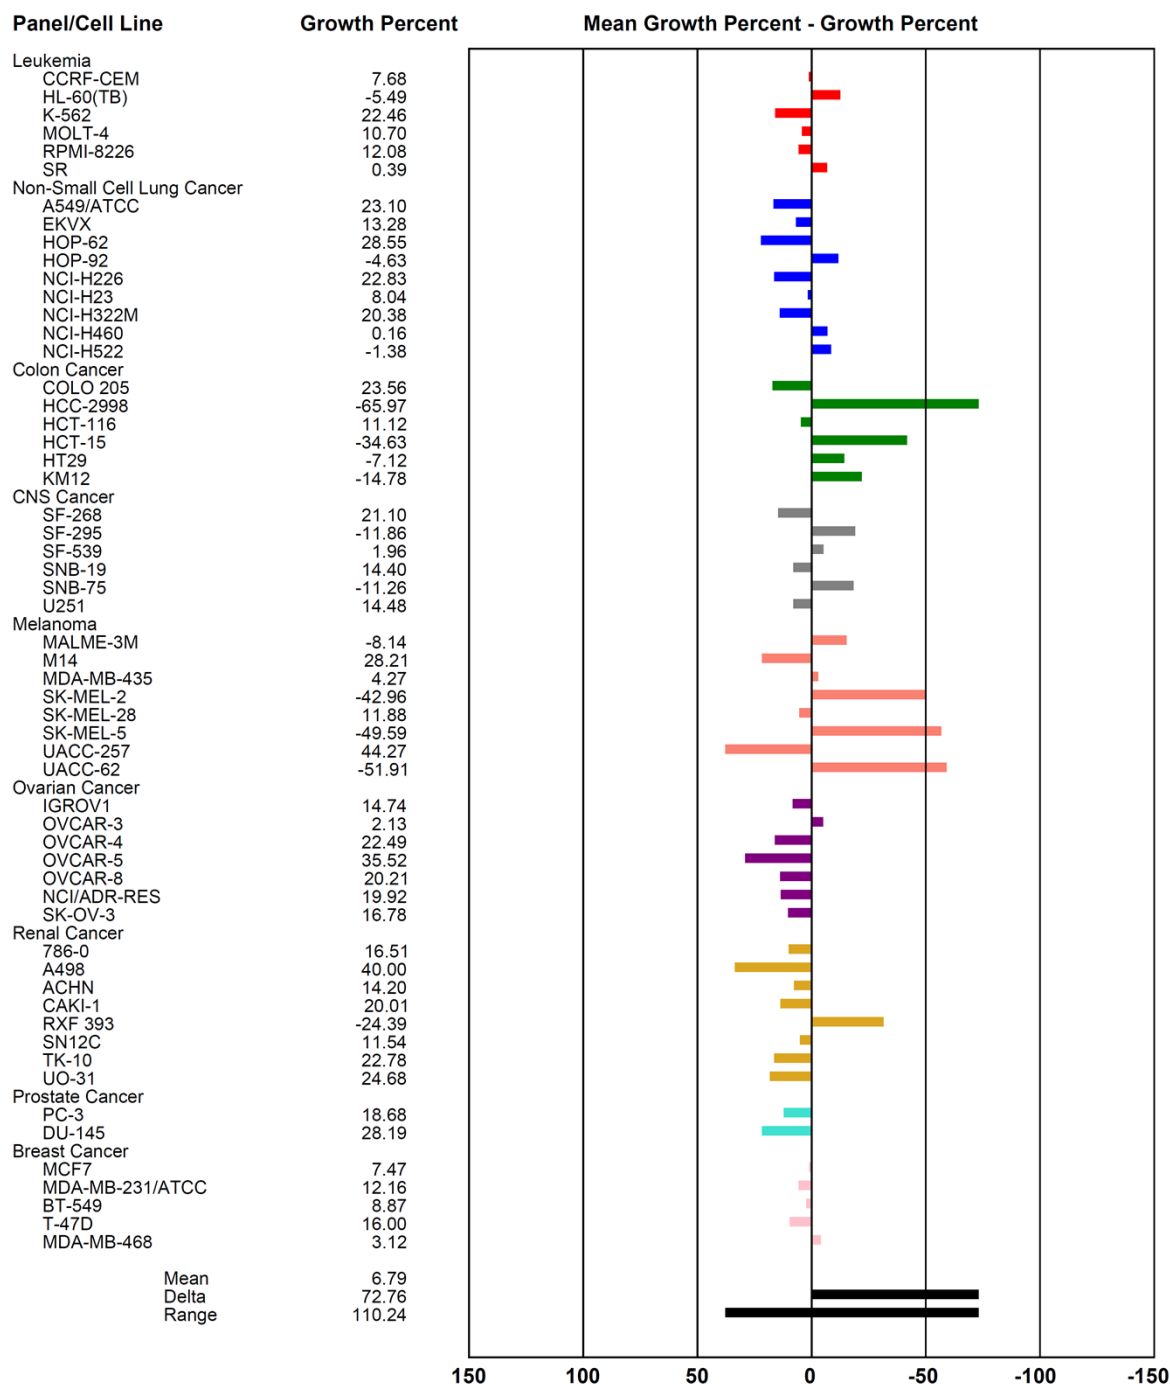

# Compound 6n

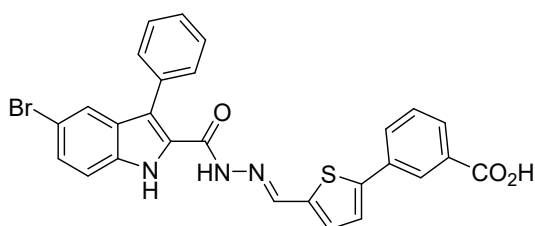

## Developmental Therapeutics Program

NSC: D-838303 / 1

Conc: 1.00E-5 Molar

Test Date: May 23, 2022

## One Dose Mean Graph

Experiment ID: 2205OS30

Report Date: Jun 26, 2022

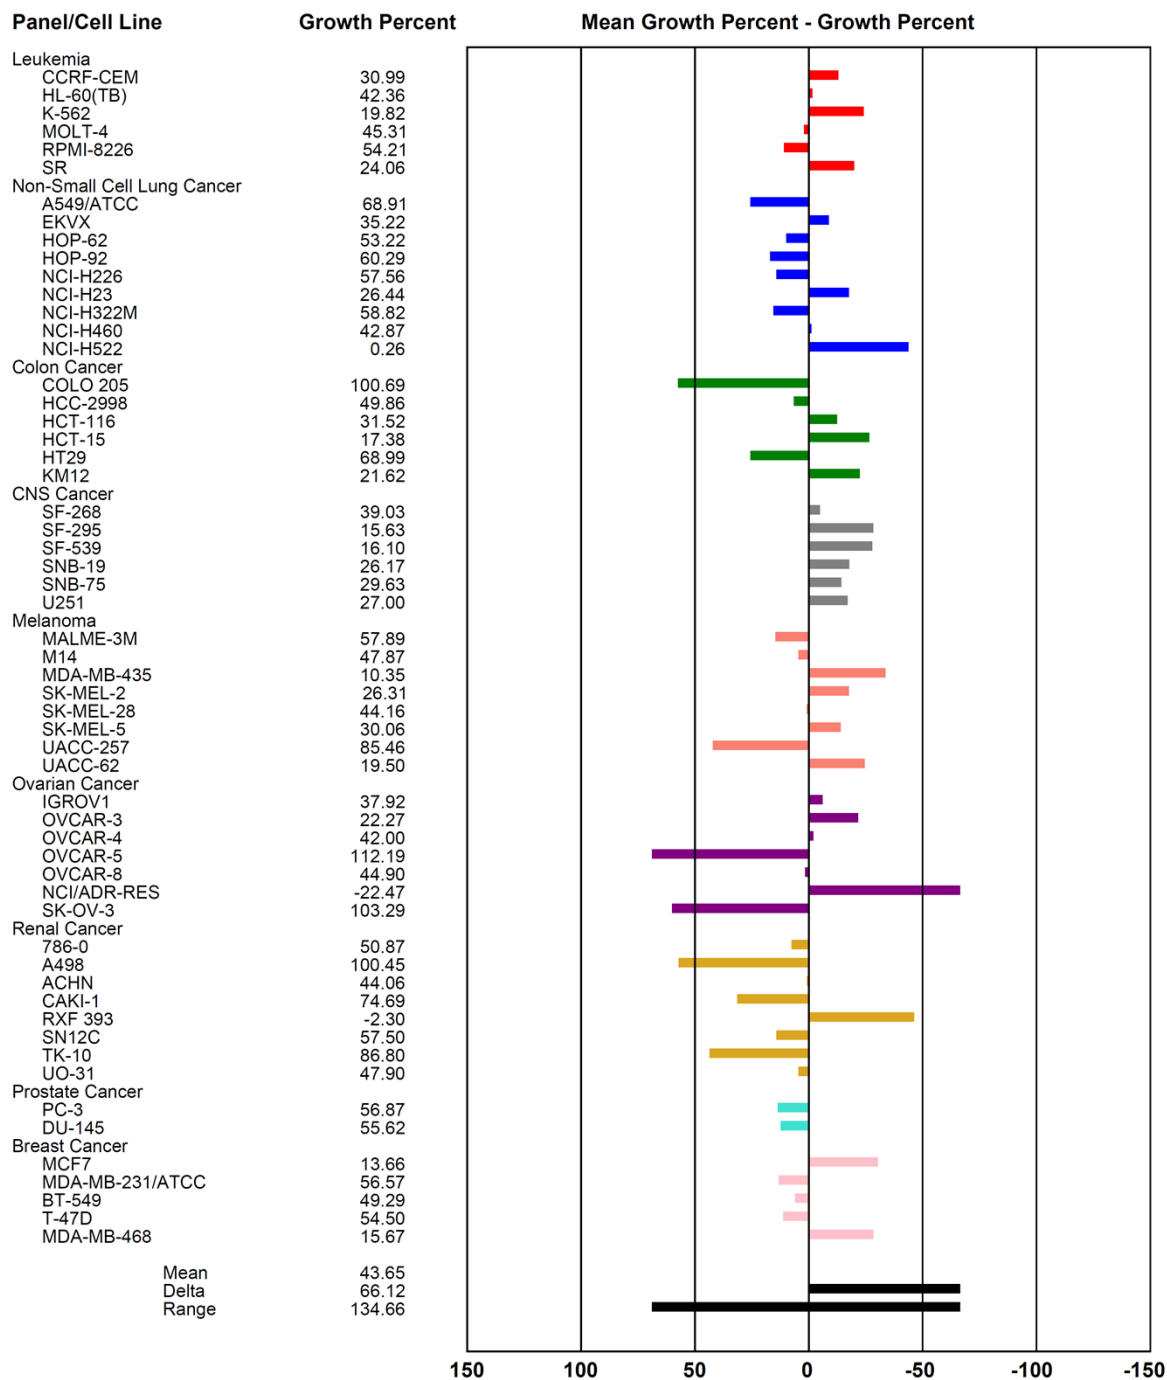

# Compound 60

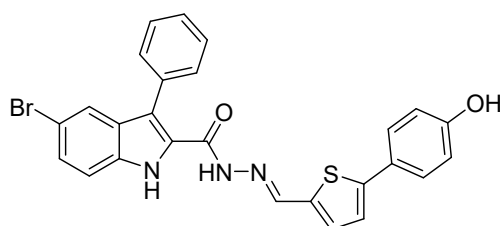

## Developmental Therapeutics Program

NSC: D-838305 / 1

Conc: 1.00E-5 Molar

Test Date: May 23, 2022

## One Dose Mean Graph

Experiment ID: 2205OS30

Report Date: Jun 26, 2022

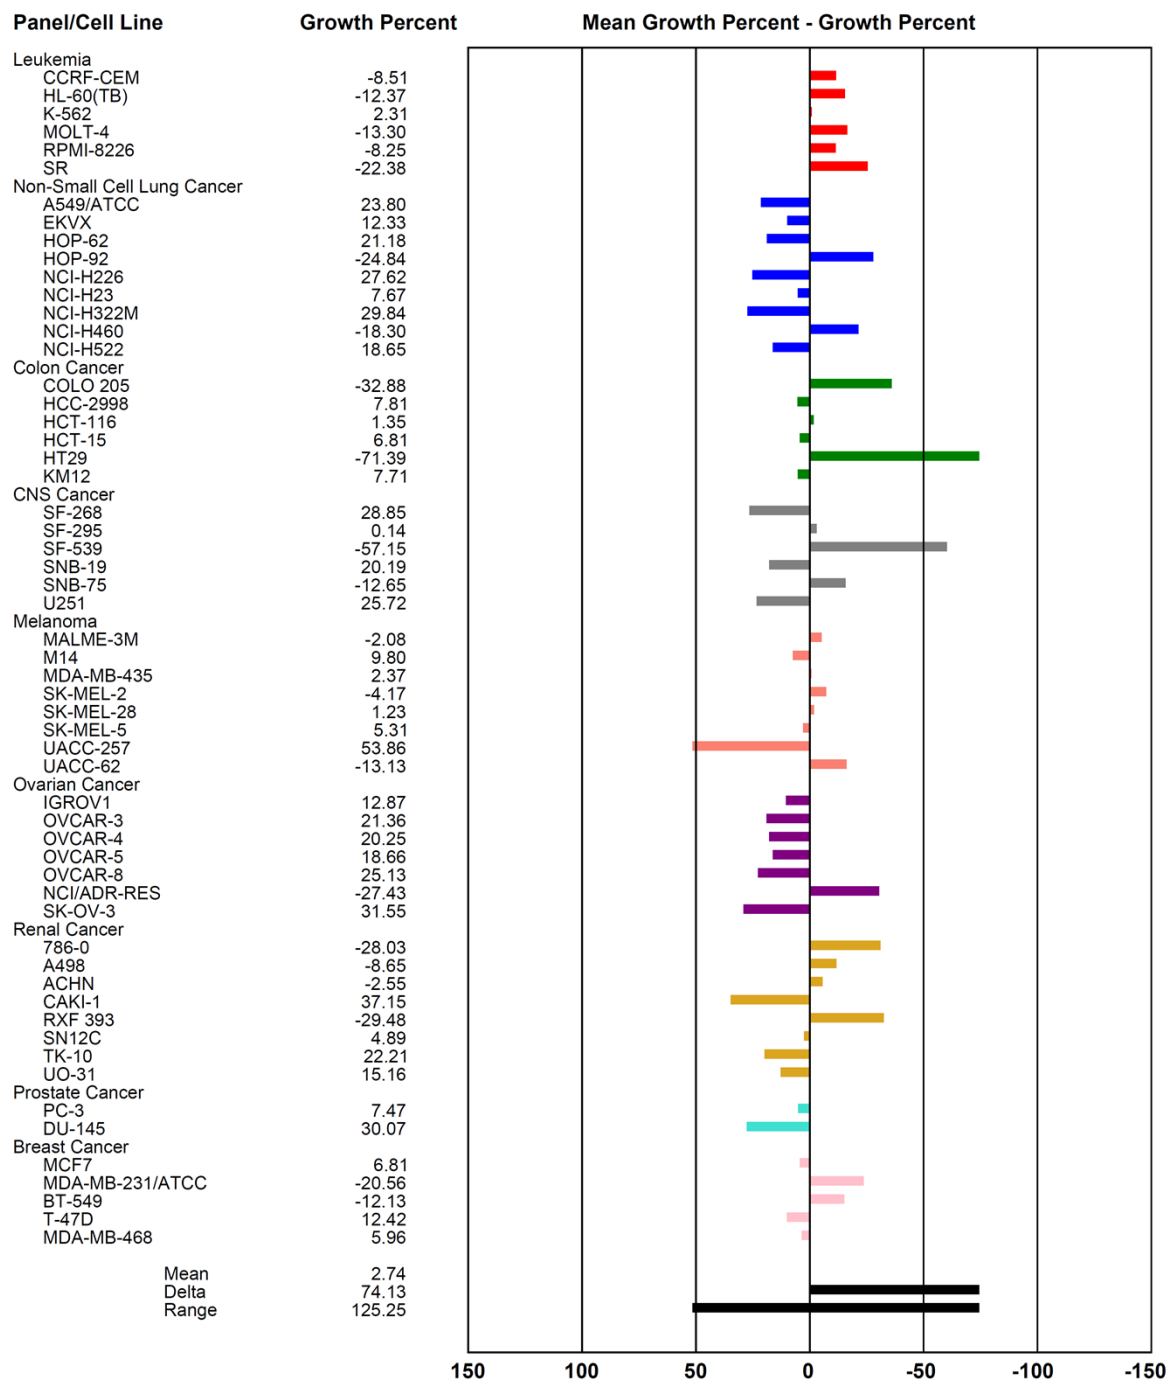



**Table S1.** GI<sub>50</sub> and LC<sub>50</sub> screen for compounds **5a-b**, **5e-i**, **5k**, **6a-j**, **6m**, and **6o**

| Disease         | Cell line       | GI <sub>50</sub> , nM |       |       |      |        |       |       |      |       |       |
|-----------------|-----------------|-----------------------|-------|-------|------|--------|-------|-------|------|-------|-------|
|                 |                 | 5a                    | 5b    | 5e    | 5f   | 5g     | 5h    | 5i    | 5k   | 6a    | 6b    |
| leukemia        | CCRF-CEM        | 167                   | 44.1  | 265   | 387  | 2910   | 4190  | 19300 | 375  | 41.5  | 242   |
|                 | HL-60 (TB)      | 88.4                  | 30.6  | 206   | 237  | 1940   | 2210  | 12400 | 218  | 32.2  | 240   |
|                 | K-562           | 40.7                  | 47    | 69.2  | 54.3 | 3280   | 2890  | 20800 | 333  | 34.6  | 102   |
|                 | MOLT-4          | 229                   | 41.4  | 410   | 355  | 3450   | 3340  | 20300 | 398  | 60.3  | 447   |
|                 | RPMI-8226       | 128                   | 52.2  | 420   | 318  | 3310   | 3060  | 25900 | 435  | 43.4  | 146   |
|                 | SR              | 41.5                  | 54.8  | 143   | 95   |        |       | 11800 | 367  | 37.7  |       |
| NSC lung cancer | A549/ATCC       | 172                   | 188   | 393   | 362  | 3660   | 3550  | 32300 | 460  | 160   | 512   |
|                 | EKVX            | 2870                  | 1950  | 452   | 2040 | 5740   | 6700  | 28800 | 3150 | 10700 | 490   |
|                 | HOP-62          | 438                   | 648   | 292   | 835  | 3490   | 3540  | 29500 | 577  | 174   | 437   |
|                 | HOP-92          | 219                   | 81.6  | 2870  | 342  | 46100  | 12800 | 10600 | 2600 | 111   | 1990  |
|                 | NCI-H226        | 333                   | 247   | 351   | 283  | 23500  | 10200 | 34500 | 1660 | 196   | 3210  |
|                 | NCI-H23         | 551                   | 292   | 333   | 478  | 4870   | 5230  | 34100 | 338  | 115   | 739   |
|                 | NCI-H322M       | 405                   | 408   | 797   | 478  | 8370   | 7500  | 28700 | 594  | 307   | 1380  |
|                 | NCI-H460        | 111                   | 218   | 347   | 315  | 3490   | 3260  | 21300 | 342  | 41    | 184   |
|                 | NCI-H522        | 23.9                  | 18.4  | 82.6  | 37.4 | 1730   | 2000  | 7640  | 225  | 19.7  | 196   |
|                 | COLO 205        | 113                   | 187   | 198   | 233  | 2750   | 2480  | 26400 | 1630 | 81.2  | 381   |
| Colon cancer    | HCC-2998        | 229                   | 432   | 328   | 420  | 4630   | 4160  | 16100 | 428  | 10.1  | 399   |
|                 | HCT-116         | 49.4                  | 38.8  | 58.3  | 126  | 3040   | 3330  | 27700 | 326  | 34.5  | 209   |
|                 | HCT-15          | 46.8                  | 172   | 310   | 185  | 3590   | 3340  | 18600 | 318  | 31.9  | 276   |
|                 | HT29            | 112                   | 33.4  | 191   | 307  | 2580   | 2360  | 21900 | 1530 | 35.9  | 261   |
|                 | KM12            | 201                   | 308   | 307   | 401  | 3740   | 3970  | 22400 | 332  | 77.4  | 313   |
|                 | SW-620          | 65.7                  | 109   | 415   | 331  | 4500   | 4600  | 25400 | 422  | 43.7  | 242   |
| CNS cancer      | SF-268          | 552                   | 408   | 521   | 605  | 5550   | 4940  | 20800 | 719  | 448   | 1340  |
|                 | SF-295          | 46.4                  | 112   | 315   | 138  | 3170   | 3160  | 20400 | 663  | 34    | 224   |
|                 | SF-539          | 56.9                  | 25.7  | 230   | 163  | 2340   | 2350  | 14700 | 228  | 25.2  | 203   |
|                 | SNB-19          | 234                   | 334   | 388   | 344  | 3480   | 3840  | 21600 | 419  | 109   | 2030  |
|                 | SNB-75          | 142                   | 99.5  | 509   | 171  | 4560   | 2870  | 4020  | 813  | 202   | 204   |
|                 | U251            | 192                   | 320   | 330   | 312  | 3340   | 3440  | 20000 | 353  | 106   | 388   |
| Melanoma        | LOX IMVI        | 64.7                  | 33.3  | 222   |      | 3710   | 3840  | 20000 | 302  | 32.3  | 237   |
|                 | MALME-3M        | 151                   | 107   | 537   | 1030 | 3770   | 3720  | 19100 | 475  | 150   | 4850  |
|                 | M14             | 135                   | 265   | 217   | 289  | 3430   | 3490  | 29800 | 292  | 56.2  | 379   |
|                 | MDA-MB-435      | 34                    | 77.5  | 186   | 80.8 | 3200   | 2720  | 12500 | 248  | 27.3  | 78.9  |
|                 | SK-MEL-2        | 240                   | 73.9  | 289   | 412  | 2680   | 3040  | 14600 | 313  | 135   | 448   |
|                 | SK-MEL-28       | 536                   | 117   | 841   | 921  | 6750   | 7180  | 15800 | 836  | 129   | 9230  |
|                 | SK-MEL-5        | 88.7                  | 139   | 231   | 213  | 2220   | 2940  | 15700 | 248  | 36.4  | 244   |
|                 | UACC-257        | 465                   | 97.4  | 1360  | 437  | 5790   | 6860  | 24500 | 1830 | 203   | 4250  |
|                 | UACC-62         | 39.4                  | 53.5  | 462   | 73.1 | 4460   | 4170  | 4980  | 489  | 37.6  | 295   |
|                 | IGROV1          | 157                   | 273   | 410   | 285  | 4330   | 4590  | 25300 | 401  | 61.4  | 695   |
| Ovarian Cancer  | OVCAR-3         | 254                   | 341   | 234   | 512  | 3470   | 2480  | 12200 | 299  | 68    | 185   |
|                 | OVCAR-4         | 623                   | 87.9  | 637   | 553  | >1.0E5 | 26200 | 21100 | 1920 | 189   | 11300 |
|                 | OVCAR-5         | 264                   | 87    | 436   | 383  | 3840   | 4310  | 36500 | 431  | 68.5  | 820   |
|                 | OVCAR-8         | 121                   | 84.5  | 209   | 184  | 2440   | 2390  | 20700 | 293  | 44.2  | 288   |
|                 | NCI/ADR-RES     | 299                   | 45.5  | 136   | 286  | 2530   | 2400  |       |      | 52.5  | 172   |
|                 | SK-OV-3         | 408                   | 360   | 764   | 669  | 3610   | 3610  | 28300 | 612  | 36.8  | 1980  |
| Renal Cancer    | 786-0           | 359                   | 389   | 271   | 398  | 2760   | 2840  | 24200 | 1990 | 158   | 447   |
|                 | A498            | 4290                  | 13800 | 14800 | 2770 | >1.0E5 | 93200 | 23600 | 6260 | 70100 | 21400 |
|                 | ACHN            | 202                   | 91.5  | 501   | 278  | 4760   | 5430  | 29300 | 514  | 66.4  | 639   |
|                 | CAKI-1          | 89                    | 181   | 648   | 224  | 30900  | 11400 | 22000 | 469  | 65.1  | 444   |
|                 | RXF 393         | 348                   | 1100  | 326   | 632  | 2650   | 2370  | 11300 | 296  |       | 224   |
|                 | SN12C           | 135                   | 59.9  | 388   | 268  | 3990   | 4130  | 24800 | 418  | 64.5  | 615   |
|                 | TK-10           | 2820                  | 3560  | 5140  | 2770 | >1.0E5 | 29100 | 38700 | 5100 | 37700 | 13900 |
|                 | UO-31           | 108                   | 366   | 491   | 321  |        |       | 25000 | 653  | 64.7  | 614   |
| Prostate Cancer | PC-3            | 232                   | 288   | 562   | 348  | 4280   | 3960  | 25100 | 559  | 117   | 906   |
|                 | DU-145          | 229                   | 249   | 326   | 376  | 4200   | 4190  | 36400 | 393  | 49.3  | 506   |
| Breast Cancer   | MCF7            | 41.4                  | 34.9  | 324   | 44.3 | 3560   | 3500  | 28300 | 327  | 33.1  | 108   |
|                 | MDA-MB-231/ATCC | 195                   | 71.2  | 246   | 251  |        |       | 27900 | 306  | 128   | 976   |
|                 | HS 578T         | 286                   | 900   | 366   | 850  | 4250   | 3730  | 38700 | 291  | 66.8  | 201   |
|                 | BT-549          | 181                   | 166   | 192   | 227  | 2160   | 2800  | 20100 | 419  | 47.1  | 269   |
|                 | T-47D           | 1760                  | 2340  | 3500  | 2020 | >1.0E5 | 7940  | 30900 | 3020 | 11000 | 52100 |
|                 | MDA-MB-468      | 299                   | 48.5  | 341   | 371  | 2280   | 2290  | 19500 | 225  | 122   | 995   |

| Disease         | Cell line       | GI <sub>50</sub> , nM |       |      |       |       |       |       |       |       |       |
|-----------------|-----------------|-----------------------|-------|------|-------|-------|-------|-------|-------|-------|-------|
|                 |                 | 6c                    | 6d    | 6e   | 6f    | 6g    | 6h    | 6i    | 6j    | 6m    | 6o    |
| leukemia        | CCRF-CEM        | 311                   | 412   | 66   | 399   | 357   | 37.7  | 27.1  | 345   | 4440  | 2460  |
|                 | HL-60 (TB)      | 193                   | 234   | 52.9 | 248   | 214   | 28.8  | 30.2  | 202   | 4310  | 2100  |
|                 | K-562           | 152                   | 330   | 37.5 | 216   | 348   | 35.8  | 28.8  | 312   | 6150  | 2940  |
|                 | MOLT-4          | 289                   | 439   | 190  | 383   | 473   | 44.4  | 53.7  | 405   | 6420  | 2030  |
|                 | RPMI-8226       | 281                   | 433   | 51.6 | 313   | 491   | 41.0  | 34.9  | 386   | 6050  | 3140  |
| NSC lung cancer | SR              | 243                   | 327   | 49.8 | 271   |       | 37.6  | 23.5  |       | 13700 | 2580  |
|                 | A549/ATCC       | 364                   | 372   | 31.7 | 357   | 412   | 65.3  | 44.3  | 628   | 13500 | 4280  |
|                 | EKVX            | 2130                  | 4830  | 1880 | 1100  | 422   | 19800 | 41.4  | 549   | 14400 | 4040  |
|                 | HOP-62          | 1480                  | 969   | 558  | 480   | 501   | 491   | 51.1  | 391   | 12300 | 6320  |
|                 | HOP-92          | 287                   | 383   | 383  | 322   | 1010  | 68.6  | 188   | 5680  | 4410  | 2980  |
|                 | NCI-H226        | 233                   | 259   | 278  | 230   | 936   | 35.8  | 23.1  | 2850  | 21000 | 5630  |
|                 | NCI-H23         | 482                   | 477   | 161  | 531   | 370   | 48.3  | 38    | 632   | 21700 | 3250  |
|                 | NCI-H322M       | 421                   | 477   | 495  | 874   | 666   | 204   | 56.4  | 859   | 17500 | 5180  |
|                 | NCI-H460        | 328                   | 338   | 319  | 326   | 352   | 182   | 37    | 382   | 12300 | 2720  |
|                 | NCI-H522        | 27.3                  | 31.2  | 23   | 47.3  | 226   | 19.3  | <10   | 213   | 15900 | 3420  |
| Colon cancer    | COLO 205        | 204                   | 224   | 195  | 203   | 244   | 191   | 19.1  | 435   | 16100 | 7120  |
|                 | HCC-2998        | 465                   | 404   | 378  | 251   | 362   | 348   | 28.7  | 831   | 11800 | 3160  |
|                 | HCT-116         | 167                   | 282   | 42.3 | 290   | 328   | 34.5  | 18.3  | 389   | 3700  | 3090  |
|                 | HCT-15          | 238                   | 310   | 49.7 | 285   | 338   | 62    | 28    | 426   | 5270  | 2720  |
|                 | HT29            | 209                   | 258   | 64.8 | 317   | 266   | 36.4  | 30.3  | 305   | 12700 | 2300  |
|                 | KM12            | 377                   | 416   | 377  | 382   | 360   | 257   | 32.3  | 449   | 15300 | 2770  |
|                 | SW-620          | 370                   | 411   | 89.6 | 349   | 417   | 56.3  | 42.9  | 416   | 13800 | 4140  |
| CNS cancer      | SF-268          | 569                   | 782   | 907  | 939   | 555   | 578   | 50.4  | 947   | 13500 | 5160  |
|                 | SF-295          | 249                   | 306   | 41.4 | 290   | 325   | 35.3  | 25.8  | 317   | 7340  | 2200  |
|                 | SF-539          | 67                    | 209   | 32.1 | 191   | 242   | 27.1  | 20.9  | 271   | 6790  | 2760  |
|                 | SNB-19          | 315                   | 377   | 275  | 355   | 363   | 218   | 32.4  | 498   | 6760  | 4010  |
|                 | SNB-75          | 245                   | 208   | 219  | 197   | 276   | 54.9  | 68.9  | 311   | 11200 | 3270  |
| Melanoma        | U251            | 311                   | 332   | 291  | 332   | 322   | 214   | 33.1  | 420   | 5980  | 3630  |
|                 | LOX IMVI        |                       |       |      | 260   | 369   |       | 29.6  | 553   | 25700 | 2000  |
|                 | MALME-3M        | 352                   | 498   | 333  | 406   | 531   | 50.5  | 52.2  | 704   | 16300 | 2410  |
|                 | M14             | 341                   | 405   | 161  | 269   | 336   | 56.4  | 29.2  | 316   | 6310  | 2750  |
|                 | MDA-MB-435      | 163                   | 188   | 36   | 181   | 250   | 25.3  | 19.1  | 240   | 6810  | 2990  |
|                 | SK-MEL-2        | 327                   | 372   | 355  | 291   | 380   | 39.3  |       | 308   | 15600 | 3450  |
|                 | SK-MEL-28       | 420                   | 731   | 318  | 383   | 856   | 91.6  | 2530  | 964   | 7170  | 3220  |
|                 | SK-MEL-5        | 238                   | 239   | 124  | 214   | 230   | 52.3  | 18.6  | 321   | 12000 | 1870  |
|                 | UACC-257        | 316                   | 445   | 187  | 706   | 961   | 80.3  | 2660  | 709   | 18700 | 10500 |
|                 | UACC-62         | 246                   | 439   | 45.1 | 213   | 408   | 46.7  | 52.9  | 314   | 11700 | 2650  |
| Ovarian Cancer  | IGROV1          | 314                   | 363   | 84   | 423   | 402   | 39.5  | 38    | 736   | 7850  | 3450  |
|                 | OVCAR-3         | 385                   | 638   | 376  | 495   | 327   | 54.5  | 36.8  | 407   | 13700 | 3380  |
|                 | OVCAR-4         | 410                   | 484   | 253  | 721   | 7310  | 67.8  | 3900  | 9090  | 7680  | 3520  |
|                 | OVCAR-5         | 344                   | 396   | 306  | 392   | 417   | 51.1  | 50.8  | 825   | 17100 | 5150  |
|                 | OVCAR-8         | 144                   | 247   | 130  | 288   | 261   | 32.4  | 33.1  | 340   | 15900 | 4220  |
|                 | NCI/ADR-RES     | 76.6                  | 650   | 55.4 | 429   | 239   | 41    |       | 268   |       |       |
|                 | SK-OV-3         |                       |       | 583  | 532   | 881   | 77.1  | 39.3  | 499   | 20000 | 12200 |
| Renal Cancer    | 786-0           | 382                   | 489   | 321  | 585   | 403   | 59.1  | 36.7  | 563   | 3130  | 2160  |
|                 | A498            | 22000                 | 16700 | 2430 | 12100 | 12800 | 21400 | 28200 | 16500 | 20700 | 5570  |
|                 | ACHN            | 213                   | 434   | 92.5 | 366   | 569   | 58.9  | 48    | 778   | 11400 | 2920  |
|                 | CAKI-1          | 301                   | 346   | 90.4 | 391   | 527   | 59.8  | 28.7  | 679   | 21100 | 3460  |
|                 | RXF 393         | 1030                  | 1270  |      | 266   | 301   |       | 97.5  | 230   | 13900 | 1920  |
|                 | SN12C           | 260                   | 346   | 83.2 | 330   | 381   | 44.5  | 32    | 632   | 9730  | 3480  |
|                 | TK-10           | 16100                 | 12900 | 2930 | 2670  | 12200 | 13300 | 10300 | 10200 | 26800 | 5050  |
|                 | UO-31           | 402                   | 480   | 98.6 | 478   | 134   | 63.4  | 60.2  |       | 10400 | 2700  |
| Prostate Cancer | PC-3            | 367                   | 399   | 213  | 320   | 464   | 127   | 34.2  | 427   | 4790  | 3170  |
|                 | DU-145          | 316                   | 410   | 235  | 389   | 403   | 50.5  | 34    | 478   | 24900 | 4480  |
| Breast Cancer   | MCF7            | 199                   | 295   | 37.5 | 293   | 363   | 37.6  | 21.7  | 358   | 18100 | 2570  |
|                 | MDA-MB-231/ATCC | 219                   | 266   | 189  | 316   | 345   | 30.2  | 26.4  |       | 20600 | 3360  |
|                 | HS 578T         | 672                   | 791   | 1230 | 570   | 290   | 3770  | 27.5  | 429   | 6670  | 3020  |
|                 | BT-549          | 236                   | 233   | 259  | 257   | 272   | 29.4  | 32.3  | 973   | 1950  | 2950  |
|                 | T-47D           | 5510                  | 3440  | 2160 | 800   | 5120  | 4890  | 4190  | 359   | 13900 | 4600  |
|                 | MDA-MB-468      | 24800                 | 334   | 293  | 308   | 216   | 38    | 23    | 277   | 19100 | 2670  |

| Disease         | Cell line       | LC <sub>50</sub> , nM |            |            |             |             |        |        |             |        |             |
|-----------------|-----------------|-----------------------|------------|------------|-------------|-------------|--------|--------|-------------|--------|-------------|
|                 |                 | 5a                    | 5b         | 5e         | 5f          | 5g          | 5h     | 5i     | 5k          | 6a     | 6b          |
| leukemia        | CCRF-CEM        | >1.0E5                | >1.0E5     | >1.0E5     | >1.0E5      | >1.0E5      | 69900  | >1.0E5 | >1.0E5      | >1.0E5 | >1.0E5      |
|                 | HL-60 (TB)      | >1.0E5                | >1.0E5     | >1.0E5     | >1.0E5      | >1.0E5      | 21700  | >1.0E5 | >1.0E5      | >1.0E5 | >1.0E5      |
|                 | K-562           | >1.0E5                | >1.0E5     | >1.0E5     | >1.0E5      | >1.0E5      | >1.0E5 | >1.0E5 | >1.0E5      | >1.0E5 | >1.0E5      |
|                 | MOLT-4          | 91800                 | >1.0E5     | >1.0E5     | >1.0E5      | >1.0E5      | >1.0E5 | >1.0E5 | >1.0E5      | >1.0E5 | >1.0E5      |
|                 | RPMI-8226       | >1.0E5                | >1.0E5     | >1.0E5     | >1.0E5      | >1.0E5      | >1.0E5 | 93200  | >1.0E5      | >1.0E5 | >1.0E5      |
| NSC lung cancer | SR              | >1.0E5                | >1.0E5     | >1.0E5     | >1.0E5      | >1.0E5      | >1.0E5 | >1.0E5 | >1.0E5      | >1.0E5 | >1.0E5      |
|                 | A549/ATCC       | >1.0E5                | >1.0E5     | 61500      | >1.0E5      | >1.0E5      | 82100  | >1.0E5 | 90100       | >1.0E5 | >1.0E5      |
|                 | EKVX            | >1.0E5                | >1.0E5     | >1.0E5     | >1.0E5      | >1.0E5      | >1.0E5 | >1.0E5 | 39400       | >1.0E5 | >1.0E5      |
|                 | HOP-62          | 57000                 | 47000      | 38700      | >1.0E5      | >1.0E5      | 54600  | >1.0E5 | 52900       | >1.0E5 | 63600       |
|                 | HOP-92          | 42600                 | >1.0E5     | 97100      | >1.0E5      | >1.0E5      | >1.0E5 | >1.0E5 | 54700       | >1.0E5 | 87300       |
|                 | NCI-H226        | 63300                 | 88400      | >1.0E5     | >1.0E5      | >1.0E5      | >1.0E5 | >1.0E5 | 84300       | >1.0E5 | >1.0E5      |
|                 | NCI-H23         | 63000                 | >1.0E5     | 62900      | >1.0E5      | >1.0E5      | >1.0E5 | >1.0E5 | 38200       | >1.0E5 | >1.0E5      |
|                 | NCI-H322M       | 52800                 | >1.0E5     | 46600      | >1.0E5      | >1.0E5      | >1.0E5 | >1.0E5 | 40600       | >1.0E5 | >1.0E5      |
|                 | NCI-H460        | 36800                 | 47700      | 38200      | 13100       | >1.0E5      | >1.0E5 | >1.0E5 | 23600       | >1.0E5 | 59000       |
|                 | NCI-H522        | 27300                 | 11600      | 48300      | <b>5390</b> | <b>9130</b> | 16600  | >1.0E5 | 12900       | >1.0E5 | 60600       |
| Colon cancer    | COLO 205        |                       | <b>659</b> | <b>692</b> | <b>1790</b> | 56600       | >1.0E5 | >1.0E5 | <b>7210</b> |        | 20500       |
|                 | HCC-2998        | 33200                 | 53700      | 50200      | <b>4700</b> | >1.0E5      | >1.0E5 | 58600  | 10000       | >1.0E5 | 70000       |
|                 | HCT-116         | 36500                 | 10000      | 40500      | 34700       | >1.0E5      | 62800  | >1.0E5 | 24500       | >1.0E5 | 45300       |
|                 | HCT-15          | 57600                 | 89800      | 80200      | 25700       | >1.0E5      | >1.0E5 | >1.0E5 | 30700       | >1.0E5 | 49100       |
|                 | HT29            | 34700                 | 49000      | 81200      | 35300       | >1.0E5      | 31500  | >1.0E5 | 35800       | >1.0E5 | 36300       |
|                 | KM12            | 82100                 | >1.0E5     | 35700      | >1.0E5      | >1.0E5      | >1.0E5 | >1.0E5 | 80100       | >1.0E5 | 63800       |
|                 | SW-620          | 91700                 | >1.0E5     | 76900      | 21300       | >1.0E5      | >1.0E5 | >1.0E5 | 43900       | >1.0E5 | >1.0E5      |
|                 | CNS cancer      | SF-268                | >1.0E5     | >1.0E5     | 85100       | >1.0E5      | >1.0E5 | >1.0E5 | >1.0E5      | 79000  | >1.0E5      |
| SF-295          |                 | 38700                 | 34900      | 52700      | 56700       | >1.0E5      | >1.0E5 | >1.0E5 | <b>8090</b> | >1.0E5 | 38700       |
| SF-539          |                 | 37200                 | 10600      | 29600      | 19400       | 62400       | 17100  | 91200  | 16800       | >1.0E5 | 29600       |
| SNB-19          |                 | 47600                 | >1.0E5     | 41000      | >1.0E5      | >1.0E5      | >1.0E5 | >1.0E5 | 37400       | >1.0E5 | >1.0E5      |
| SNB-75          |                 | 40500                 | 64400      | 68800      | >1.0E5      | >1.0E5      | >1.0E5 | >1.0E5 | 60900       | >1.0E5 | >1.0E5      |
| Melanoma        | U251            | 46800                 | 47700      | 39000      | 11000       | >1.0E5      | 41100  | >1.0E5 | 47400       | >1.0E5 | 57500       |
|                 | LOX IMVI        | 33200                 | 35200      | 36500      |             | >1.0E5      | 68800  | >1.0E5 | 21400       | >1.0E5 | 37500       |
|                 | MALME-3M        | 54800                 | 52100      | 61400      | <b>8470</b> | >1.0E5      | >1.0E5 | >1.0E5 | 37000       | >1.0E5 | 85100       |
|                 | M14             | 84000                 | >1.0E5     | 69500      | 15600       | >1.0E5      | >1.0E5 | >1.0E5 | 37400       | >1.0E5 | 48100       |
|                 | MDA-MB-435      |                       | <b>747</b> |            | <b>734</b>  | >1.0E5      | >1.0E5 | >1.0E5 | 25600       |        | 41300       |
|                 | SK-MEL-2        | 80800                 | 36100      | 49200      | 32200       | >1.0E5      | >1.0E5 | 95400  | 35200       | >1.0E5 | 49900       |
|                 | SK-MEL-28       | 46500                 | 48700      | 85500      | 22300       | >1.0E5      | >1.0E5 | >1.0E5 | 39400       | >1.0E5 | 60500       |
|                 | SK-MEL-5        | 19500                 | 10200      | 15700      | <b>2620</b> | 36100       | >1.0E5 | 69400  | <b>4140</b> | >1.0E5 | <b>6970</b> |
|                 | UACC-257        | 69400                 | >1.0E5     | 94100      | >1.0E5      | >1.0E5      | >1.0E5 | >1.0E5 | 48000       | >1.0E5 | >1.0E5      |
|                 | UACC-62         | 34500                 | 42300      | 62000      | <b>5290</b> | >1.0E5      | >1.0E5 | >1.0E5 | 39100       | >1.0E5 | 46500       |
| Ovarian Cancer  | IGROV1          | 51700                 | >1.0E5     | >1.0E5     | >1.0E5      | >1.0E5      | >1.0E5 | >1.0E5 | 41600       | >1.0E5 | 97200       |
|                 | OVCAR-3         | 93700                 | 38800      | 46000      | 75700       | >1.0E5      | >1.0E5 | >1.0E5 | 33400       | >1.0E5 | 53100       |
|                 | OVCAR-4         | >1.0E5                | >1.0E5     | 87000      | >1.0E5      | >1.0E5      | >1.0E5 | >1.0E5 | 54500       | >1.0E5 | >1.0E5      |
|                 | OVCAR-5         | 64100                 | 77700      | 98700      | >1.0E5      | >1.0E5      | >1.0E5 | >1.0E5 | 34200       | >1.0E5 | >1.0E5      |
|                 | OVCAR-8         | 50000                 | 21500      | 29800      | <b>4190</b> | >1.0E5      | 21100  | >1.0E5 | 42800       | >1.0E5 | 56600       |
|                 | NCI/ADR-RES     | 59500                 | 72300      | 32800      | >1.0E5      | >1.0E5      | 38500  |        |             | >1.0E5 | 94700       |
|                 | SK-OV-3         | 48700                 | >1.0E5     | 91300      | >1.0E5      | >1.0E5      | >1.0E5 | >1.0E5 | 48700       | >1.0E5 | >1.0E5      |
| Renal Cancer    | 786-0           | 41700                 | 63200      | 34600      | 64900       | >1.0E5      | 45000  | >1.0E5 | 23100       | >1.0E5 | >1.0E5      |
|                 | A498            | 51300                 | 77400      | >1.0E5     | >1.0E5      | >1.0E5      | >1.0E5 | >1.0E5 | 50100       | >1.0E5 | >1.0E5      |
|                 | ACHN            | 64800                 | >1.0E5     | 38500      | 43500       | >1.0E5      | >1.0E5 | >1.0E5 | 28800       | >1.0E5 | >1.0E5      |
|                 | CAKI-1          | 36500                 | 76300      | 60200      | 68200       | >1.0E5      | >1.0E5 | >1.0E5 | 37700       | >1.0E5 | >1.0E5      |
|                 | RXF 393         | 52000                 | 61300      | 45200      | <b>9190</b> | >1.0E5      | 88500  | >1.0E5 | 23900       | >1.0E5 | >1.0E5      |
|                 | SN12C           | 20400                 | 31500      | 56200      | <b>4240</b> | >1.0E5      | 90200  | >1.0E5 | 24400       | >1.0E5 | 38600       |
|                 | TK-10           | 57700                 | >1.0E5     | 84100      | >1.0E5      | >1.0E5      | >1.0E5 | >1.0E5 | 47100       | >1.0E5 | >1.0E5      |
|                 | UO-31           | 44200                 | 98200      | 42100      | >1.0E5      |             |        | >1.0E5 | 34300       | >1.0E5 | >1.0E5      |
| Prostate Cancer | PC-3            | 45900                 | >1.0E5     | >1.0E5     | 56400       | >1.0E5      | >1.0E5 | >1.0E5 | 90700       | >1.0E5 | >1.0E5      |
|                 | DU-145          | 47000                 | >1.0E5     | 56200      | >1.0E5      | >1.0E5      | >1.0E5 | >1.0E5 | 32500       | >1.0E5 | >1.0E5      |
| Breast Cancer   | MCF7            | 48600                 | 45700      | >1.0E5     | >1.0E5      | >1.0E5      | >1.0E5 | >1.0E5 | 38300       | >1.0E5 | 83400       |
|                 | MDA-MB-231/ATCC | 37000                 | 40900      | 30000      | 37000       |             |        | >1.0E5 | 32600       | >1.0E5 | 58900       |
|                 | HS 578T         | >1.0E5                | >1.0E5     | >1.0E5     | >1.0E5      | >1.0E5      | >1.0E5 | >1.0E5 | >1.0E5      | >1.0E5 | >1.0E5      |
|                 | BT-549          | 17900                 | 26500      | 67500      | <b>6950</b> | >1.0E5      | 29800  | >1.0E5 | 26600       | >1.0E5 | 31900       |
|                 | T-47D           | >1.0E5                | >1.0E5     | >1.0E5     | >1.0E5      | >1.0E5      | >1.0E5 | >1.0E5 | >1.0E5      | >1.0E5 | >1.0E5      |
| MDA-MB-468      | 74200           | >1.0E5                | 66400      | >1.0E5     | >1.0E5      | >1.0E5      | >1.0E5 | 17700  | >1.0E5      | >1.0E5 |             |

| Disease         | Cell line       | LC <sub>50</sub> , nM |        |             |             |             |            |             |             |        |             |       |
|-----------------|-----------------|-----------------------|--------|-------------|-------------|-------------|------------|-------------|-------------|--------|-------------|-------|
|                 |                 | 6c                    | 6d     | 6e          | 6f          | 6g          | 6h         | 6i          | 6j          | 6m     | 6o          |       |
| leukemia        | CCRF-CEM        | >1.0E5                | >1.0E5 | >1.0E5      | >1.0E5      | 70700       | >1.0E5     | >1.0E5      | >1.0E5      | >1.0E5 | >1.0E5      |       |
|                 | HL-60 (TB)      | >1.0E5                | 98500  | >1.0E5      | >1.0E5      | >1.0E5      | >1.0E5     | >1.0E5      | >1.0E5      | 96600  | >1.0E5      |       |
|                 | K-562           | >1.0E5                | >1.0E5 | >1.0E5      | >1.0E5      | >1.0E5      | >1.0E5     | >1.0E5      | >1.0E5      | >1.0E5 | >1.0E5      |       |
|                 | MOLT-4          | >1.0E5                | >1.0E5 | >1.0E5      | >1.0E5      | >1.0E5      | >1.0E5     | >1.0E5      | >1.0E5      | >1.0E5 | >1.0E5      |       |
|                 | RPMI-8226       | >1.0E5                | >1.0E5 | >1.0E5      | >1.0E5      | >1.0E5      | >1.0E5     | >1.0E5      | >1.0E5      | >1.0E5 | >1.0E5      |       |
| NSC lung cancer | SR              | >1.0E5                | >1.0E5 | >1.0E5      | >1.0E5      | >1.0E5      | >1.0E5     | 94900       | >1.0E5      | >1.0E5 | >1.0E5      |       |
|                 | A549/ATCC       | >1.0E5                | >1.0E5 | 44900       | 86800       | 38100       | >1.0E5     | >1.0E5      | >1.0E5      | >1.0E5 | 70500       |       |
|                 | EKVX            | >1.0E5                | >1.0E5 | 95300       | >1.0E5      | 33900       | >1.0E5     | >1.0E5      | >1.0E5      | >1.0E5 | 39000       |       |
|                 | HOP-62          | >1.0E5                | >1.0E5 | 47200       | 55500       | 46900       | >1.0E5     | 35100       | >1.0E5      | 75200  | 73400       |       |
|                 | HOP-92          | >1.0E5                | >1.0E5 | 82200       | >1.0E5      | 31200       | >1.0E5     | >1.0E5      | >1.0E5      | 79800  | 46100       |       |
|                 | NCI-H226        | >1.0E5                | >1.0E5 | >1.0E5      | >1.0E5      | >1.0E5      | >1.0E5     | >1.0E5      | >1.0E5      | >1.0E5 | 64400       |       |
|                 | NCI-H23         | >1.0E5                | >1.0E5 | 41400       | >1.0E5      | 40900       | >1.0E5     | 65600       | >1.0E5      | >1.0E5 | 35500       |       |
|                 | NCI-H322M       | >1.0E5                | >1.0E5 | >1.0E5      | >1.0E5      | 43700       | >1.0E5     | >1.0E5      | >1.0E5      | >1.0E5 | 42700       |       |
|                 | NCI-H460        | >1.0E5                | >1.0E5 | 38600       | 78300       | 42500       | >1.0E5     | 79500       | >1.0E5      | 80400  | 32100       |       |
|                 | NCI-H522        | >1.0E5                | 64500  | 26600       | 10800       | 33500       | 58500      | 42600       | <b>8560</b> | 70500  | 87800       |       |
| Colon cancer    | COLO 205        |                       |        |             | <b>795</b>  | <b>4980</b> | <b>719</b> | <b>70.8</b> | <b>5920</b> | 71400  | 63500       |       |
|                 | HCC-2998        | >1.0E5                | >1.0E5 | 48000       | 66400       | 32300       | >1.0E5     | >1.0E5      | >1.0E5      | 63200  | 33400       |       |
|                 | HCT-116         | >1.0E5                | >1.0E5 | 38800       | 82600       | 28700       | >1.0E5     | 21300       | >1.0E5      | 38900  | 37700       |       |
|                 | HCT-15          | >1.0E5                | >1.0E5 | 36600       | 78900       | 35600       | >1.0E5     | >1.0E5      | >1.0E5      | 54100  | 33000       |       |
|                 | HT29            | >1.0E5                | >1.0E5 | 41100       | >1.0E5      | 44100       | >1.0E5     | 11900       | 23000       | 72800  | 92400       |       |
| CNS cancer      | KM12            | >1.0E5                | >1.0E5 | >1.0E5      | 95000       | 62800       | >1.0E5     | >1.0E5      | >1.0E5      | >1.0E5 | 47000       |       |
|                 | SW-620          | >1.0E5                | >1.0E5 | 68700       | >1.0E5      | 47900       | >1.0E5     | >1.0E5      | >1.0E5      | 84200  | 49500       |       |
|                 | SF-268          | >1.0E5                | >1.0E5 | >1.0E5      | >1.0E5      | 75100       | >1.0E5     | >1.0E5      | >1.0E5      | >1.0E5 | 59700       |       |
|                 | SF-295          | >1.0E5                | >1.0E5 | 28600       | >1.0E5      | 36500       | >1.0E5     | 53000       | 56900       | 81100  | 16600       |       |
|                 | SF-539          | 36500                 | 48200  | 24100       | <b>9680</b> | 25300       | 44300      | 19100       | 34400       | 58900  | 28800       |       |
| Melanoma        | SNB-19          | >1.0E5                | >1.0E5 | 77600       | >1.0E5      | 37800       | >1.0E5     | >1.0E5      | >1.0E5      | 49900  | 37400       |       |
|                 | SNB-75          | >1.0E5                | >1.0E5 | >1.0E5      | >1.0E5      | 66900       | >1.0E5     | >1.0E5      | >1.0E5      | >1.0E5 | 67000       |       |
|                 | U251            | >1.0E5                | >1.0E5 | 45600       | 61400       | 39200       | >1.0E5     | 51300       | 57500       | 62600  | 66000       |       |
|                 | LOX IMVI        |                       |        |             | 41700       | 35600       |            | 60400       | 58500       | >1.0E5 | 19600       |       |
|                 | MALME-3M        | >1.0E5                | >1.0E5 | 70600       | 24100       | 49100       | >1.0E5     | >1.0E5      | >1.0E5      | 89300  | 31700       |       |
|                 | M14             | >1.0E5                | >1.0E5 | 75400       | 45600       | 43400       | >1.0E5     | >1.0E5      | 59900       | >1.0E5 | 33900       |       |
|                 | MDA-MB-435      |                       |        | >1.0E5      | <b>861</b>  | 34800       | >1.0E5     | <b>259</b>  | 98000       | >1.0E5 | 37200       |       |
|                 | SK-MEL-2        | >1.0E5                | >1.0E5 | 71400       | 42700       | 66700       | >1.0E5     |             | 36200       | 81800  | 47700       |       |
|                 | SK-MEL-28       | >1.0E5                | >1.0E5 | 52800       | >1.0E5      | 44400       | >1.0E5     | >1.0E5      | >1.0E5      | 53600  | 35400       |       |
|                 | SK-MEL-5        | 52600                 | 32800  | <b>4610</b> | <b>1870</b> | <b>2980</b> | 35000      | <b>74.9</b> | 15000       | 60700  | <b>9250</b> |       |
| Ovarian Cancer  | UACC-257        | >1.0E5                | >1.0E5 | 73100       | >1.0E5      | 44700       | >1.0E5     | >1.0E5      | >1.0E5      | >1.0E5 | 74300       |       |
|                 | UACC-62         | >1.0E5                | >1.0E5 | 12500       | 18200       | 34000       | >1.0E5     | 84700       | 51600       | 51700  | 32200       |       |
|                 | IGROV1          | >1.0E5                | >1.0E5 | 34900       | >1.0E5      | 48600       | >1.0E5     | >1.0E5      | >1.0E5      | 60300  | 36200       |       |
|                 | OVCAR-3         | >1.0E5                | >1.0E5 | 87000       | >1.0E5      | 42900       | 86600      | >1.0E5      | 58400       | 93300  | 39700       |       |
|                 | OVCAR-4         | >1.0E5                | >1.0E5 | >1.0E5      | >1.0E5      | 86700       | >1.0E5     | >1.0E5      | >1.0E5      | >1.0E5 | 44000       |       |
|                 | OVCAR-5         | >1.0E5                | >1.0E5 | >1.0E5      | >1.0E5      | 40700       | >1.0E5     | >1.0E5      | >1.0E5      | 57900  | 41400       |       |
|                 | OVCAR-8         | >1.0E5                | >1.0E5 | 22500       | 21700       | 52300       | >1.0E5     | >1.0E5      | 59900       | >1.0E5 | 56300       |       |
|                 | NCI/ADR-RES     | >1.0E5                | >1.0E5 | 76800       | >1.0E5      | >1.0E5      | >1.0E5     | >1.0E5      | >1.0E5      | >1.0E5 | >1.0E5      |       |
|                 | SK-OV-3         | >1.0E5                | >1.0E5 | 69700       | >1.0E5      | 49100       | >1.0E5     | >1.0E5      | >1.0E5      | 85000  | 63600       |       |
|                 | Renal Cancer    | 786-0                 | >1.0E5 | >1.0E5      | 60200       | >1.0E5      | 35400      | >1.0E5      | >1.0E5      | >1.0E5 | 42200       | 32500 |
| A498            |                 | >1.0E5                | >1.0E5 | >1.0E5      | >1.0E5      | 51600       | >1.0E5     | >1.0E5      | >1.0E5      | >1.0E5 | 48800       |       |
| ACHN            |                 | >1.0E5                | >1.0E5 | 30400       | 31500       | 38500       | >1.0E5     | >1.0E5      | >1.0E5      | >1.0E5 | 33100       |       |
| CAKI-1          |                 | >1.0E5                | 60900  | 36800       | 55400       | 45000       | >1.0E5     | >1.0E5      | >1.0E5      | >1.0E5 | 40200       |       |
| RXF 393         |                 | >1.0E5                | >1.0E5 | 36700       | >1.0E5      | 41300       | >1.0E5     | 59800       | >1.0E5      | >1.0E5 | 12300       |       |
| SN12C           |                 | >1.0E5                | >1.0E5 | 39200       | 12600       | 38300       | >1.0E5     | >1.0E5      | 41100       | 89200  | 36300       |       |
| TK-10           |                 | >1.0E5                | >1.0E5 | 94400       | >1.0E5      | 54400       | >1.0E5     | >1.0E5      | >1.0E5      | >1.0E5 | 56200       |       |
| UO-31           |                 | >1.0E5                | >1.0E5 | 44400       | >1.0E5      | 40400       | >1.0E5     | >1.0E5      |             | >1.0E5 | 36700       |       |
| Prostate Cancer |                 | PC-3                  | >1.0E5 | >1.0E5      | 68900       | >1.0E5      | >1.0E5     | >1.0E5      | >1.0E5      | >1.0E5 | >1.0E5      | 73900 |
|                 |                 | DU-145                | >1.0E5 | >1.0E5      | 62900       | >1.0E5      | 38100      | >1.0E5      | >1.0E5      | >1.0E5 | >1.0E5      | 41200 |
| Breast Cancer   | MCF7            | >1.0E5                | >1.0E5 | 30700       | >1.0E5      | 50400       | 68600      | >1.0E5      | >1.0E5      | >1.0E5 | 42300       |       |
|                 | MDA-MB-231/ATCC | >1.0E5                | >1.0E5 | 55200       | >1.0E5      | 35300       | >1.0E5     | >1.0E5      |             | >1.0E5 | 35200       |       |
|                 | HS 578T         | >1.0E5                | >1.0E5 | >1.0E5      | >1.0E5      | >1.0E5      | >1.0E5     | >1.0E5      | >1.0E5      | >1.0E5 | >1.0E5      |       |
|                 | BT-549          | >1.0E5                | >1.0E5 | 42000       | 85800       | <b>9210</b> | >1.0E5     | >1.0E5      | 31100       | 47100  | 35600       |       |
|                 | T-47D           | >1.0E5                | >1.0E5 | >1.0E5      | >1.0E5      | 86300       | >1.0E5     | >1.0E5      | >1.0E5      | >1.0E5 | >1.0E5      |       |
| MDA-MB-468      | >1.0E5          | >1.0E5                | 56600  | >1.0E5      | 26100       | >1.0E5      | 72400      | >1.0E5      | >1.0E5      | 26700  |             |       |

**Figure S2.** NCI60 five dose screen

Compound **5a**

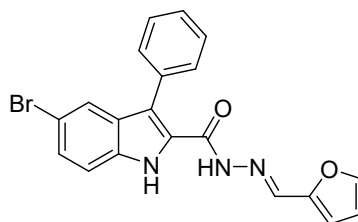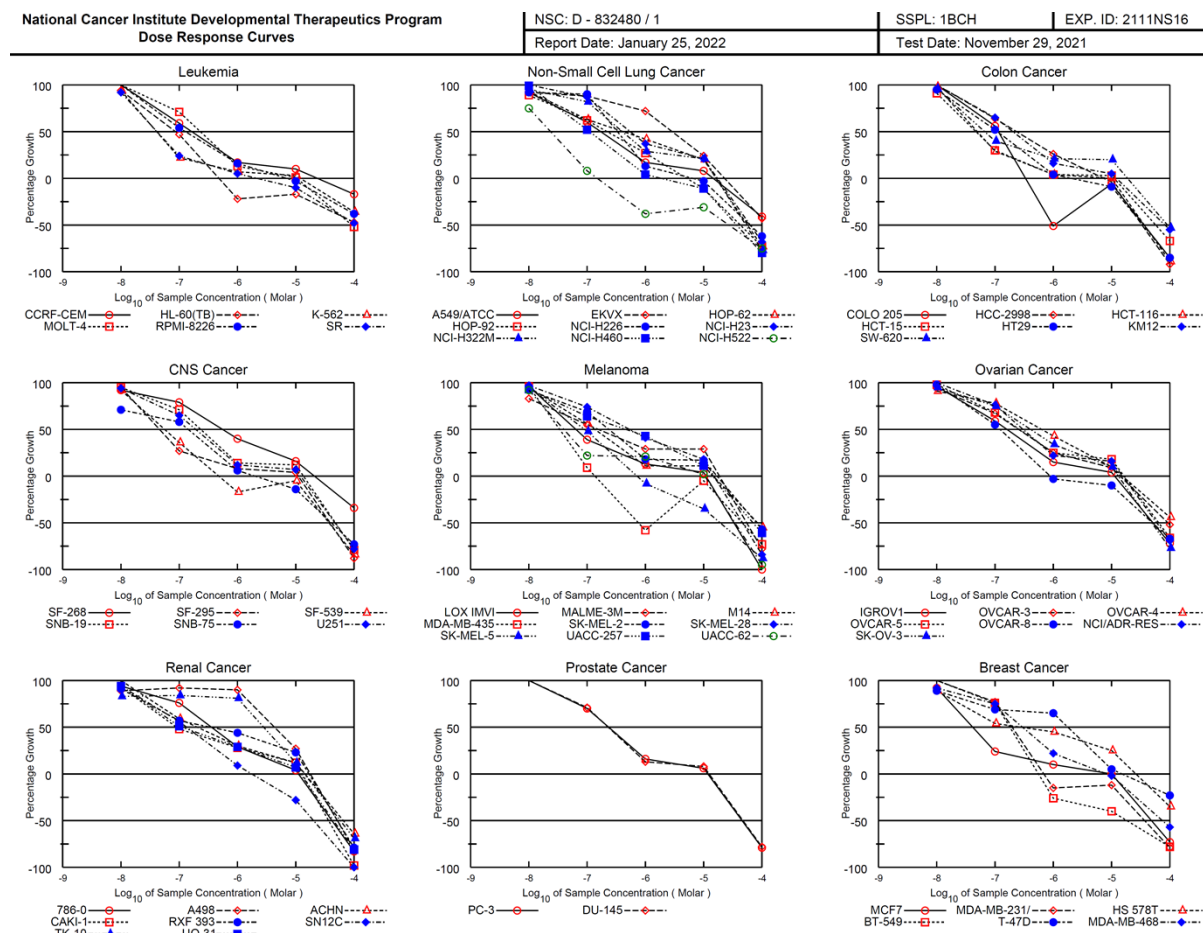

## National Cancer Institute Developmental Therapeutics Program In-Vitro Testing Results

|                                |                                       |                |               |
|--------------------------------|---------------------------------------|----------------|---------------|
| NSC : D - 832480 / 1           | Experiment ID : 2111NS16              | Test Type : 08 | Units : Molar |
| Report Date : January 25, 2022 | Test Date : November 29, 2021         | QNS :          | MC :          |
| COMI : TO7                     | Stain Reagent : SRB Dual-Pass Related | SSPL : 1BCH    |               |

| Panel/Cell Line                   | Time Zero | Log10 Concentration |                        |       |       |       |        |                |      |      |      | GI50 | TGI     | LC50    |           |
|-----------------------------------|-----------|---------------------|------------------------|-------|-------|-------|--------|----------------|------|------|------|------|---------|---------|-----------|
|                                   |           | Ctrl                | Mean Optical Densities |       |       |       |        | Percent Growth |      |      |      |      |         |         |           |
|                                   |           | -8.0                | -7.0                   | -6.0  | -5.0  | -4.0  | -8.0   | -7.0           | -6.0 | -5.0 | -4.0 |      |         |         |           |
| <b>Leukemia</b>                   |           |                     |                        |       |       |       |        |                |      |      |      |      |         |         |           |
| CCRF-CEM                          | 0.530     | 2.678               | 2.670                  | 1.805 | 0.901 | 0.744 | 0.440  | 100            | 59   | 17   | 10   | -17  | 1.67E-7 | 2.33E-5 | > 1.00E-4 |
| HL-60(TB)                         | 0.572     | 2.412               | 2.310                  | 1.446 | 0.447 | 0.478 | 0.302  | 94             | 47   | -22  | -17  | -47  | 8.84E-8 | 4.84E-7 | > 1.00E-4 |
| K-562                             | 0.154     | 1.652               | 1.569                  | 0.477 | 0.263 | 0.193 | 0.098  | 94             | 22   | 7    | 3    | -36  | 4.07E-8 | 1.17E-5 | > 1.00E-4 |
| MOLT-4                            | 0.590     | 2.454               | 2.484                  | 1.909 | 0.834 | 0.605 | 0.284  | 102            | 71   | 13   | 1    | -52  | 2.29E-7 | 1.03E-5 | 9.18E-5   |
| RPMI-8226                         | 0.581     | 2.571               | 2.594                  | 1.658 | 0.900 | 0.566 | 0.361  | 101            | 54   | 16   | -3   | -38  | 1.28E-7 | 7.26E-6 | > 1.00E-4 |
| SR                                | 0.371     | 1.750               | 1.634                  | 0.705 | 0.435 | 0.334 | 0.195  | 92             | 24   | 5    | -10  | -48  | 4.15E-8 | 2.07E-6 | > 1.00E-4 |
| <b>Non-Small Cell Lung Cancer</b> |           |                     |                        |       |       |       |        |                |      |      |      |      |         |         |           |
| A549(ATCC)                        | 0.337     | 2.059               | 1.930                  | 1.375 | 0.627 | 0.470 | 0.201  | 92             | 60   | 17   | 8    | -41  | 1.72E-7 | 1.45E-5 | > 1.00E-4 |
| EKVX                              | 1.027     | 1.958               | 1.882                  | 1.850 | 1.697 | 1.251 | 0.591  | 92             | 88   | 72   | 24   | -43  | 2.87E-6 | 2.30E-5 | > 1.00E-4 |
| HOP-62                            | 0.707     | 1.821               | 1.738                  | 1.414 | 1.180 | 0.931 | 0.194  | 93             | 63   | 42   | 20   | -73  | 4.38E-7 | 1.65E-5 | 5.70E-5   |
| HOP-92                            | 1.244     | 1.858               | 1.794                  | 1.624 | 1.411 | 1.109 | 0.336  | 89             | 62   | 27   | -11  | -73  | 2.19E-7 | 5.17E-6 | 4.26E-5   |
| NCI-H226                          | 0.822     | 1.491               | 1.436                  | 1.426 | 0.911 | 0.795 | 0.316  | 92             | 90   | 13   | -3   | -62  | 3.33E-7 | 6.32E-6 | 6.33E-5   |
| NCI-H23                           | 0.419     | 1.441               | 1.460                  | 1.311 | 0.797 | 0.636 | 0.135  | 102            | 87   | 37   | 21   | -68  | 5.51E-7 | 1.73E-5 | 6.30E-5   |
| NCI-H322M                         | 0.810     | 1.975               | 1.914                  | 1.765 | 1.152 | 1.056 | 0.184  | 95             | 82   | 29   | 21   | -77  | 4.05E-7 | 1.64E-5 | 5.28E-5   |
| NCI-H460                          | 0.323     | 3.025               | 3.000                  | 1.735 | 0.439 | 0.287 | 0.066  | 99             | 52   | 4    | -11  | -80  | 1.11E-7 | 1.89E-6 | 3.68E-5   |
| NCI-H522                          | 1.038     | 2.400               | 2.065                  | 1.151 | 0.642 | 0.719 | 0.261  | 75             | 8    | -38  | -31  | -75  | 2.39E-8 | 1.51E-7 | 2.73E-5   |
| <b>Colon Cancer</b>               |           |                     |                        |       |       |       |        |                |      |      |      |      |         |         |           |
| COLO 205                          | 0.628     | 2.514               | 2.539                  | 1.682 | 0.306 | 0.588 | 0.097  | 101            | 56   | -51  | -6   | -85  | 1.13E-7 | 3.32E-7 |           |
| HCC-2998                          | 0.495     | 1.550               | 1.546                  | 1.166 | 0.768 | 0.474 | 0.040  | 100            | 64   | 26   | -4   | -92  | 2.29E-7 | 7.18E-6 | 3.32E-5   |
| HCT-116                           | 0.226     | 2.409               | 2.366                  | 0.854 | 0.309 | 0.228 | 0.025  | 98             | 29   | 4    | 0    | -89  | 4.94E-8 | 1.00E-5 | 3.65E-5   |
| HCT-15                            | 0.217     | 1.469               | 1.361                  | 0.588 | 0.264 | 0.251 | 0.073  | 91             | 30   | 4    | 3    | -67  | 4.68E-8 | 1.09E-5 | 5.76E-5   |
| HT29                              | 0.373     | 2.353               | 2.263                  | 1.409 | 0.444 | 0.340 | 0.056  | 95             | 52   | 4    | -9   | -85  | 1.12E-7 | 1.94E-6 | 3.47E-5   |
| KM12                              | 0.833     | 3.351               | 3.340                  | 2.461 | 1.246 | 0.947 | 0.374  | 100            | 65   | 16   | 5    | -55  | 2.01E-7 | 1.19E-5 | 8.21E-5   |
| SW-620                            | 0.333     | 2.610               | 2.512                  | 1.240 | 0.819 | 0.778 | 0.158  | 96             | 40   | 21   | 20   | -53  | 6.57E-8 | 1.86E-5 | 9.17E-5   |
| <b>CNS Cancer</b>                 |           |                     |                        |       |       |       |        |                |      |      |      |      |         |         |           |
| SF-268                            | 1.079     | 2.925               | 2.772                  | 2.528 | 1.819 | 1.375 | 0.716  | 92             | 79   | 40   | 16   | -34  | 5.52E-7 | 2.10E-5 | > 1.00E-4 |
| SF-295                            | 0.472     | 1.957               | 1.883                  | 0.880 | 0.588 | 0.536 | 0.057  | 95             | 27   | 8    | 4    | -88  | 4.64E-8 | 1.11E-5 | 3.87E-5   |
| SF-539                            | 0.563     | 1.811               | 1.713                  | 1.017 | 0.467 | 0.536 | 0.090  | 92             | 36   | -17  | -5   | -84  | 5.69E-8 | 4.79E-7 | 3.72E-5   |
| SNB-19                            | 0.527     | 1.772               | 1.715                  | 1.410 | 0.704 | 0.673 | 0.109  | 95             | 71   | 14   | 12   | -79  | 2.34E-7 | 1.34E-5 | 4.76E-5   |
| SNB-75                            | 2.216     | 3.128               | 2.864                  | 2.744 | 2.269 | 1.901 | 0.597  | 71             | 58   | 6    | -14  | -73  | 1.42E-7 | 1.95E-6 | 4.05E-5   |
| U251                              | 0.581     | 2.761               | 2.635                  | 2.000 | 0.840 | 0.725 | 0.129  | 94             | 65   | 12   | 7    | -78  | 1.92E-7 | 1.20E-5 | 4.68E-5   |
| <b>Melanoma</b>                   |           |                     |                        |       |       |       |        |                |      |      |      |      |         |         |           |
| LOX IMV1                          | 0.163     | 1.237               | 1.199                  | 0.584 | 0.302 | 0.211 | -0.005 | 96             | 39   | 13   | 4    | -100 | 6.47E-8 | 1.10E-5 | 3.32E-5   |
| MALME-3M                          | 0.726     | 1.449               | 1.323                  | 1.121 | 0.934 | 0.932 | 0.162  | 83             | 55   | 29   | 29   | -78  | 1.51E-7 | 1.85E-5 | 5.48E-5   |
| M14                               | 0.470     | 1.982               | 1.911                  | 1.314 | 0.631 | 0.634 | 0.212  | 95             | 56   | 11   | 11   | -55  | 1.35E-7 | 1.46E-5 | 8.40E-5   |
| MDA-MB-435                        | 0.779     | 3.066               | 2.980                  | 0.992 | 0.327 | 0.742 | 0.212  | 96             | 9    | -58  | -5   | -73  | 3.40E-8 | 1.37E-7 |           |
| SK-MEL-2                          | 1.232     | 2.690               | 2.572                  | 2.244 | 1.499 | 1.484 | 0.532  | 92             | 69   | 18   | 17   | -57  | 2.40E-7 | 1.71E-5 | 8.08E-5   |
| SK-MEL-28                         | 0.523     | 1.757               | 1.716                  | 1.433 | 1.031 | 0.739 | 0.086  | 97             | 74   | 41   | 18   | -84  | 5.36E-7 | 1.49E-5 | 4.65E-5   |
| SK-MEL-5                          | 0.640     | 2.748               | 2.648                  | 1.642 | 0.586 | 0.419 | 0.078  | 95             | 48   | -8   | -35  | -88  | 8.87E-8 | 7.07E-7 | 1.95E-5   |
| UACC-257                          | 0.948     | 2.475               | 2.371                  | 1.933 | 1.602 | 1.113 | 0.366  | 93             | 64   | 43   | 11   | -61  | 4.65E-7 | 1.41E-5 | 6.94E-5   |
| UACC-62                           | 0.837     | 2.801               | 2.642                  | 1.262 | 1.244 | 0.876 | 0.045  | 92             | 22   | 21   | 2    | -95  | 3.94E-8 | 1.05E-5 | 3.45E-5   |
| <b>Ovarian Cancer</b>             |           |                     |                        |       |       |       |        |                |      |      |      |      |         |         |           |
| IGROV1                            | 0.501     | 2.134               | 2.064                  | 1.457 | 0.743 | 0.571 | 0.142  | 96             | 59   | 15   | 4    | -72  | 1.57E-7 | 1.14E-5 | 5.17E-5   |
| OVCAR-3                           | 1.057     | 2.873               | 2.772                  | 2.275 | 1.511 | 1.215 | 0.511  | 94             | 67   | 25   | 9    | -52  | 2.54E-7 | 1.39E-5 | 9.37E-5   |
| OVCAR-4                           | 0.841     | 1.938               | 1.835                  | 1.698 | 1.310 | 0.946 | 0.468  | 91             | 78   | 43   | 10   | -44  | 6.23E-7 | 1.50E-5 | > 1.00E-4 |
| OVCAR-5                           | 0.567     | 1.722               | 1.702                  | 1.355 | 0.856 | 0.781 | 0.191  | 98             | 68   | 25   | 18   | -66  | 2.64E-7 | 1.65E-5 | 6.41E-5   |
| OVCAR-8                           | 0.512     | 2.515               | 2.477                  | 1.611 | 0.495 | 0.463 | 0.167  | 98             | 55   | -3   | -10  | -67  | 1.21E-7 | 8.74E-7 | 5.00E-5   |
| NCI/ADR-RES                       | 0.370     | 1.368               | 1.371                  | 1.127 | 0.586 | 0.529 | 0.114  | 100            | 76   | 22   | 16   | -69  | 2.99E-7 | 1.54E-5 | 5.95E-5   |
| SK-OV-3                           | 0.967     | 1.861               | 1.817                  | 1.634 | 1.274 | 1.059 | 0.218  | 95             | 75   | 34   | 10   | -77  | 4.08E-7 | 1.31E-5 | 4.87E-5   |
| <b>Renal Cancer</b>               |           |                     |                        |       |       |       |        |                |      |      |      |      |         |         |           |
| 786-0                             | 0.578     | 2.416               | 2.303                  | 1.980 | 1.110 | 0.655 | 0.097  | 94             | 76   | 29   | 4    | -83  | 3.59E-7 | 1.12E-5 | 4.17E-5   |
| A498                              | 1.326     | 2.082               | 1.997                  | 2.022 | 2.007 | 1.528 | 0.248  | 89             | 92   | 90   | 27   | -81  | 4.29E-6 | 1.77E-5 | 5.13E-5   |
| ACHN                              | 0.286     | 1.196               | 1.213                  | 0.820 | 0.563 | 0.393 | 0.102  | 102            | 59   | 30   | 12   | -64  | 2.02E-7 | 1.43E-5 | 6.48E-5   |
| CAKI-1                            | 0.680     | 2.255               | 2.138                  | 1.432 | 1.120 | 0.871 | 0.012  | 93             | 48   | 28   | 12   | -98  | 8.90E-8 | 1.29E-5 | 3.65E-5   |
| RXF 393                           | 0.651     | 1.234               | 1.181                  | 0.985 | 0.906 | 0.787 | 0.137  | 91             | 57   | 44   | 23   | -79  | 3.48E-7 | 1.69E-5 | 5.20E-5   |
| SN12C                             | 0.520     | 1.838               | 1.764                  | 1.260 | 0.638 | 0.377 | -0.001 | 94             | 56   | 9    | -28  | -100 | 1.35E-7 | 1.76E-6 | 2.04E-5   |
| TK-10                             | 1.216     | 2.065               | 1.922                  | 1.928 | 1.907 | 1.315 | 0.373  | 83             | 84   | 81   | 12   | -69  | 2.82E-6 | 1.39E-5 | 5.77E-5   |
| UO-31                             | 0.500     | 2.119               | 2.023                  | 1.321 | 0.963 | 0.606 | 0.095  | 94             | 51   | 29   | 7    | -81  | 1.08E-7 | 1.19E-5 | 4.42E-5   |
| <b>Prostate Cancer</b>            |           |                     |                        |       |       |       |        |                |      |      |      |      |         |         |           |
| PC-3                              | 0.628     | 2.147               | 2.152                  | 1.690 | 0.864 | 0.727 | 0.133  | 100            | 70   | 16   | 6    | -79  | 2.32E-7 | 1.19E-5 | 4.59E-5   |
| DU-145                            | 0.333     | 1.662               | 1.677                  | 1.277 | 0.501 | 0.433 | 0.073  | 101            | 71   | 13   | 8    | -78  | 2.29E-7 | 1.22E-5 | 4.70E-5   |
| <b>Breast Cancer</b>              |           |                     |                        |       |       |       |        |                |      |      |      |      |         |         |           |
| MCF7                              | 0.186     | 0.938               | 0.877                  | 0.367 | 0.258 | 0.187 | 0.051  | 92             | 24   | 10   | 0    | -73  | 4.14E-8 | 1.00E-5 | 4.86E-5   |
| MDA-MB-231/ATCC                   | 0.554     | 1.317               | 1.323                  | 1.139 | 0.470 | 0.489 | 0.116  | 101            | 77   | -15  | -12  | -79  | 1.95E-7 | 6.84E-7 | 3.70E-5   |
| HS 578T                           | 1.525     | 2.759               | 2.627                  | 2.189 | 2.086 | 1.832 | 0.985  | 89             | 54   | 45   | 25   | -35  | 2.86E-7 | 2.59E-5 | > 1.00E-4 |
| BT-549                            | 1.016     | 1.996               | 2.022                  | 1.764 | 0.753 | 0.606 | 0.220  | 103            | 76   | -26  | -40  | -78  | 1.81E-7 | 5.58E-7 | 1.79E-5   |
| T-47D                             | 1.368     | 3.125               | 2.929                  | 2.580 | 2.502 | 1.458 | 1.051  | 89             | 69   | 65   | 5    | -23  | 1.76E-6 | 1.51E-5 | > 1.00E-4 |
| MDA-MB-468                        | 0.702     | 1.384               | 1.331                  | 1.215 | 0.853 | 0.691 | 0.301  | 92             | 75   | 22   | -2   | -57  | 2.99E-7 | 8.53E-6 | 7.42E-5   |

# Compound 5b



National Cancer Institute Developmental Therapeutics Program  
Dose Response Curves

NSC: D - 832481 / 1  
Report Date: January 25, 2022

SSPL: 1BCH  
EXP. ID: 2111NS16  
Test Date: November 29, 2021

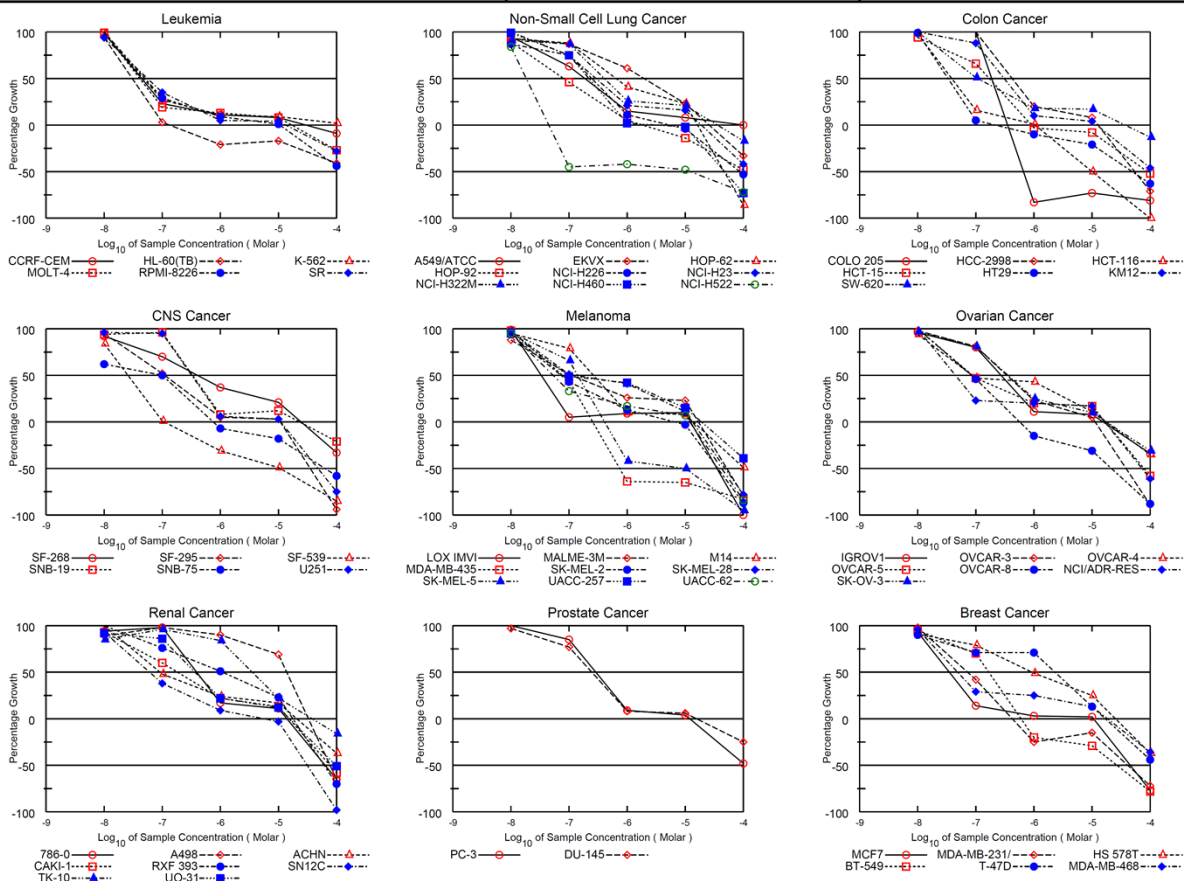



## National Cancer Institute Developmental Therapeutics Program In-Vitro Testing Results

|                                |                                       |                |               |
|--------------------------------|---------------------------------------|----------------|---------------|
| NSC : D - 832481 / 1           | Experiment ID : 2111NS16              | Test Type : 08 | Units : Molar |
| Report Date : January 25, 2022 | Test Date : November 29, 2021         | QNS :          | MC :          |
| COMI : TO8                     | Stain Reagent : SRB Dual-Pass Related | SSPL : 1BCH    |               |

| Panel/Cell Line                   | Time Zero | Log10 Concentration |                        |       |       |       |        |                |      |      |      | GI50 | TGI     | LC50      |           |
|-----------------------------------|-----------|---------------------|------------------------|-------|-------|-------|--------|----------------|------|------|------|------|---------|-----------|-----------|
|                                   |           | Ctrl                | Mean Optical Densities |       |       |       |        | Percent Growth |      |      |      |      |         |           |           |
|                                   |           | -8.0                | -7.0                   | -6.0  | -5.0  | -4.0  | -8.0   | -7.0           | -6.0 | -5.0 | -4.0 |      |         |           |           |
| <b>Leukemia</b>                   |           |                     |                        |       |       |       |        |                |      |      |      |      |         |           |           |
| CCRF-CEM                          | 0.530     | 2.620               | 2.597                  | 1.012 | 0.750 | 0.704 | 0.483  | 99             | 23   | 11   | 8    | -9   | 4.41E-8 | 3.05E-5   | > 1.00E-4 |
| HL-60(TB)                         | 0.572     | 2.349               | 2.242                  | 0.633 | 0.454 | 0.472 | 0.335  | 94             | 3    | -21  | -17  | -41  | 3.06E-8 | 1.39E-7   | > 1.00E-4 |
| K-562                             | 0.154     | 1.675               | 1.637                  | 0.563 | 0.315 | 0.298 | 0.183  | 98             | 27   | 11   | 9    | 2    | 4.70E-8 | > 1.00E-4 | > 1.00E-4 |
| MOLT-4                            | 0.590     | 2.468               | 2.452                  | 0.955 | 0.832 | 0.747 | 0.430  | 99             | 19   | 13   | 8    | -27  | 4.14E-8 | 1.72E-5   | > 1.00E-4 |
| RPMI-8226                         | 0.581     | 2.511               | 2.569                  | 1.143 | 0.763 | 0.602 | 0.323  | 103            | 29   | 9    | 1    | -44  | 5.22E-8 | 1.06E-5   | > 1.00E-4 |
| SR                                | 0.371     | 1.788               | 1.701                  | 0.860 | 0.448 | 0.422 | 0.267  | 94             | 35   | 5    | 4    | -28  | 5.48E-8 | 1.30E-5   | > 1.00E-4 |
| <b>Non-Small Cell Lung Cancer</b> |           |                     |                        |       |       |       |        |                |      |      |      |      |         |           |           |
| A549(ATCC)                        | 0.337     | 1.990               | 1.902                  | 1.383 | 0.579 | 0.464 | 0.344  | 95             | 63   | 15   | 8    | 0    | 1.88E-7 | > 1.00E-4 | > 1.00E-4 |
| EKVX                              | 1.027     | 1.961               | 1.893                  | 1.842 | 1.597 | 1.242 | 0.687  | 93             | 87   | 61   | 23   | -33  | 1.95E-6 | 2.57E-5   | > 1.00E-4 |
| HOP-62                            | 0.707     | 1.803               | 1.730                  | 1.674 | 1.158 | 0.962 | 0.101  | 93             | 88   | 41   | 23   | -86  | 6.48E-7 | 1.63E-5   | 4.70E-5   |
| HOP-92                            | 1.244     | 1.838               | 1.771                  | 1.519 | 1.273 | 1.076 | 0.650  | 89             | 46   | 5    | -14  | -48  | 8.16E-8 | 1.83E-6   | > 1.00E-4 |
| NCI-H226                          | 0.822     | 1.512               | 1.420                  | 1.340 | 0.900 | 0.790 | 0.390  | 87             | 75   | 11   | -4   | -53  | 2.47E-7 | 5.54E-6   | 8.84E-5   |
| NCI-H23                           | 0.419     | 1.352               | 1.388                  | 1.122 | 0.613 | 0.566 | 0.243  | 104            | 75   | 21   | 16   | -42  | 2.92E-7 | 1.87E-5   | > 1.00E-4 |
| NCI-H322M                         | 0.810     | 2.006               | 1.896                  | 1.855 | 1.123 | 1.063 | 0.670  | 91             | 87   | 26   | 21   | -17  | 4.08E-7 | 3.55E-5   | > 1.00E-4 |
| NCI-H460                          | 0.323     | 3.021               | 2.990                  | 2.339 | 0.367 | 0.318 | 0.088  | 99             | 75   | 2    | -2   | -73  | 2.18E-7 | 3.08E-6   | 4.77E-5   |
| NCI-H522                          | 1.038     | 2.368               | 2.159                  | 0.573 | 0.599 | 0.535 | 0.292  | 84             | -45  | -42  | -48  | -72  | 1.84E-8 | 4.50E-8   | 1.16E-5   |
| <b>Colon Cancer</b>               |           |                     |                        |       |       |       |        |                |      |      |      |      |         |           |           |
| COLO 205                          | 0.628     | 2.391               | 2.385                  | 2.388 | 0.106 | 0.173 | 0.119  | 100            | 100  | -83  | -73  | -81  | 1.87E-7 | 3.51E-7   | 6.59E-7   |
| HCC-2998                          | 0.495     | 1.563               | 1.558                  | 1.597 | 0.704 | 0.580 | 0.142  | 100            | 103  | 20   | 8    | -71  | 4.32E-7 | 1.26E-5   | 5.37E-5   |
| HCT-116                           | 0.226     | 2.367               | 2.324                  | 0.578 | 0.249 | 0.113 | -0.010 | 98             | 16   | 1    | -50  | -100 | 3.88E-8 | 1.05E-6   | 1.00E-5   |
| HCT-15                            | 0.217     | 1.430               | 1.352                  | 1.021 | 0.210 | 0.200 | 0.104  | 94             | 66   | -3   | -8   | -52  | 1.72E-7 | 8.99E-7   | 8.98E-5   |
| HT29                              | 0.373     | 2.217               | 2.199                  | 0.474 | 0.335 | 0.296 | 0.138  | 99             | 5    | -10  | -21  | -63  | 3.34E-8 | 2.22E-7   | 4.90E-5   |
| KM12                              | 0.833     | 3.331               | 3.333                  | 3.034 | 1.084 | 0.942 | 0.453  | 100            | 88   | 10   | 4    | -46  | 3.08E-7 | 1.22E-5   | > 1.00E-4 |
| SW-620                            | 0.333     | 2.442               | 2.458                  | 1.414 | 0.717 | 0.702 | 0.291  | 101            | 51   | 18   | 17   | -13  | 1.09E-7 | 3.78E-5   | > 1.00E-4 |
| <b>CNS Cancer</b>                 |           |                     |                        |       |       |       |        |                |      |      |      |      |         |           |           |
| SF-268                            | 1.079     | 2.902               | 2.751                  | 2.356 | 1.758 | 1.455 | 0.724  | 92             | 70   | 37   | 21   | -33  | 4.08E-7 | 2.43E-5   | > 1.00E-4 |
| SF-295                            | 0.472     | 1.907               | 1.829                  | 1.222 | 0.544 | 0.512 | 0.027  | 95             | 52   | 5    | 3    | -94  | 1.12E-7 | 1.07E-5   | 3.49E-5   |
| SF-539                            | 0.563     | 1.808               | 1.611                  | 0.574 | 0.390 | 0.287 | 0.084  | 84             | 1    | -31  | -49  | -85  | 2.57E-8 | 1.07E-7   | 1.06E-5   |
| SNB-19                            | 0.527     | 1.789               | 1.711                  | 1.738 | 0.632 | 0.681 | 0.414  | 94             | 96   | 8    | 12   | -21  | 3.34E-7 | 2.30E-5   | > 1.00E-4 |
| SNB-75                            | 2.216     | 3.142               | 2.787                  | 2.679 | 2.055 | 1.824 | 0.939  | 62             | 50   | -7   | -18  | -58  | 9.95E-8 | 7.47E-7   | 6.44E-5   |
| U251                              | 0.581     | 2.752               | 2.667                  | 2.642 | 0.711 | 0.653 | 0.144  | 96             | 95   | 6    | 3    | -75  | 3.20E-7 | 1.10E-5   | 4.77E-5   |
| <b>Melanoma</b>                   |           |                     |                        |       |       |       |        |                |      |      |      |      |         |           |           |
| LOX IMVI                          | 0.163     | 1.172               | 1.167                  | 0.212 | 0.251 | 0.266 | -0.007 | 99             | 5    | 9    | 10   | -100 | 3.33E-8 | 1.24E-5   | 3.52E-5   |
| MALME-3M                          | 0.726     | 1.419               | 1.339                  | 1.078 | 0.909 | 0.882 | 0.155  | 88             | 51   | 26   | 23   | -79  | 1.07E-7 | 1.67E-5   | 5.21E-5   |
| M14                               | 0.470     | 1.990               | 1.917                  | 1.672 | 0.629 | 0.598 | 0.241  | 95             | 79   | 10   | 8    | -49  | 2.65E-7 | 1.40E-5   | > 1.00E-4 |
| MDA-MB-435                        | 0.779     | 3.068               | 3.015                  | 1.787 | 0.284 | 0.274 | 0.136  | 98             | 44   | -64  | -65  | -83  | 7.75E-8 | 2.57E-7   | 7.47E-7   |
| SK-MEL-2                          | 1.232     | 2.648               | 2.559                  | 1.846 | 1.410 | 1.190 | 0.161  | 94             | 43   | 13   | -3   | -87  | 7.39E-8 | 6.12E-6   | 3.61E-5   |
| SK-MEL-28                         | 0.523     | 1.696               | 1.658                  | 1.117 | 1.004 | 0.649 | 0.117  | 97             | 51   | 41   | 11   | -78  | 1.17E-7 | 1.33E-5   | 4.87E-5   |
| SK-MEL-5                          | 0.640     | 2.703               | 2.615                  | 1.992 | 0.369 | 0.323 | 0.034  | 96             | 66   | -42  | -50  | -95  | 1.39E-7 | 4.05E-7   | 1.02E-5   |
| UACC-257                          | 0.948     | 2.514               | 2.437                  | 1.723 | 1.606 | 1.176 | 0.574  | 95             | 49   | 42   | 15   | -39  | 9.74E-8 | 1.86E-5   | > 1.00E-4 |
| UACC-62                           | 0.837     | 2.788               | 2.684                  | 1.487 | 1.167 | 0.967 | 0.135  | 95             | 33   | 17   | 7    | -84  | 5.35E-8 | 1.18E-5   | 4.23E-5   |
| <b>Ovarian Cancer</b>             |           |                     |                        |       |       |       |        |                |      |      |      |      |         |           |           |
| IGROV1                            | 0.501     | 2.132               | 2.071                  | 1.802 | 0.689 | 0.636 | 0.331  | 96             | 80   | 11   | 8    | -34  | 2.73E-7 | 1.57E-5   | > 1.00E-4 |
| OVCAR-3                           | 1.057     | 2.785               | 2.756                  | 2.456 | 1.452 | 1.148 | 0.121  | 98             | 81   | 23   | 5    | -89  | 3.41E-7 | 1.14E-5   | 3.88E-5   |
| OVCAR-4                           | 0.841     | 1.916               | 1.846                  | 1.351 | 1.299 | 0.962 | 0.551  | 94             | 47   | 43   | 11   | -35  | 8.79E-8 | 1.76E-5   | > 1.00E-4 |
| OVCAR-5                           | 0.567     | 1.670               | 1.667                  | 1.084 | 0.788 | 0.752 | 0.237  | 100            | 47   | 20   | 17   | -58  | 8.70E-8 | 1.67E-5   | 7.77E-5   |
| OVCAR-8                           | 0.512     | 2.538               | 2.543                  | 1.445 | 0.437 | 0.354 | 0.060  | 100            | 46   | -15  | -31  | -88  | 8.45E-8 | 5.72E-7   | 2.15E-5   |
| NCI/ADR-RES                       | 0.370     | 1.339               | 1.363                  | 0.591 | 0.568 | 0.532 | 0.145  | 102            | 23   | 20   | 17   | -61  | 4.55E-8 | 1.64E-5   | 7.23E-5   |
| SK-OV-3                           | 0.967     | 1.787               | 1.763                  | 1.631 | 1.174 | 1.045 | 0.666  | 97             | 81   | 25   | 10   | -31  | 3.60E-7 | 1.71E-5   | > 1.00E-4 |
| <b>Renal Cancer</b>               |           |                     |                        |       |       |       |        |                |      |      |      |      |         |           |           |
| 786-0                             | 0.578     | 2.417               | 2.298                  | 2.383 | 0.883 | 0.783 | 0.201  | 94             | 98   | 17   | 11   | -65  | 3.89E-7 | 1.40E-5   | 6.32E-5   |
| A498                              | 1.326     | 2.081               | 1.999                  | 2.069 | 2.007 | 1.847 | 0.466  | 89             | 98   | 90   | 69   | -65  | 1.38E-5 | 3.27E-5   | 7.74E-5   |
| ACHN                              | 0.286     | 1.147               | 1.174                  | 0.698 | 0.490 | 0.433 | 0.181  | 103            | 48   | 24   | 17   | -37  | 9.15E-8 | 2.07E-5   | > 1.00E-4 |
| CAKI-1                            | 0.680     | 2.241               | 2.126                  | 1.614 | 1.016 | 0.889 | 0.283  | 93             | 60   | 22   | 13   | -58  | 1.81E-7 | 1.53E-5   | 7.63E-5   |
| RXF 393                           | 0.651     | 1.194               | 1.194                  | 1.062 | 0.929 | 0.778 | 0.197  | 100            | 76   | 51   | 23   | -70  | 1.10E-6 | 1.78E-5   | 6.13E-5   |
| SN12C                             | 0.520     | 1.847               | 1.753                  | 1.021 | 0.645 | 0.507 | 0.013  | 93             | 38   | 9    | -3   | -98  | 5.99E-8 | 6.08E-6   | 3.15E-5   |
| TK-10                             | 1.216     | 2.007               | 1.887                  | 1.978 | 1.881 | 1.392 | 1.016  | 85             | 96   | 84   | 22   | -16  | 3.56E-6 | 3.76E-5   | > 1.00E-4 |
| UO-31                             | 0.500     | 2.104               | 1.983                  | 1.877 | 0.856 | 0.699 | 0.248  | 92             | 86   | 22   | 12   | -51  | 3.66E-7 | 1.57E-5   | 9.82E-5   |
| <b>Prostate Cancer</b>            |           |                     |                        |       |       |       |        |                |      |      |      |      |         |           |           |
| PC-3                              | 0.628     | 2.141               | 2.140                  | 1.910 | 0.767 | 0.686 | 0.324  | 100            | 85   | 9    | 4    | -48  | 2.88E-7 | 1.18E-5   | > 1.00E-4 |
| DU-145                            | 0.333     | 1.647               | 1.607                  | 1.349 | 0.443 | 0.407 | 0.250  | 97             | 77   | 8    | 6    | -25  | 2.49E-7 | 1.52E-5   | > 1.00E-4 |
| <b>Breast Cancer</b>              |           |                     |                        |       |       |       |        |                |      |      |      |      |         |           |           |
| MCF7                              | 0.186     | 0.921               | 0.871                  | 0.287 | 0.212 | 0.202 | 0.043  | 93             | 14   | 3    | 2    | -77  | 3.49E-8 | 1.06E-5   | 4.57E-5   |
| MDA-MB-231(ATCC)                  | 0.554     | 1.369               | 1.351                  | 0.894 | 0.417 | 0.470 | 0.155  | 98             | 42   | -25  | -15  | -72  | 7.12E-8 | 4.24E-7   | 4.09E-5   |
| HS 578T                           | 1.525     | 2.719               | 2.609                  | 2.472 | 2.105 | 1.827 | 0.962  | 91             | 79   | 49   | 25   | -37  | 9.00E-7 | 2.55E-5   | > 1.00E-4 |
| BT-549                            | 1.016     | 2.041               | 1.993                  | 1.731 | 0.811 | 0.720 | 0.221  | 95             | 70   | -20  | -29  | -78  | 1.66E-7 | 5.96E-7   | 2.65E-5   |
| T-47D                             | 1.368     | 3.101               | 2.925                  | 2.597 | 2.607 | 1.598 | 0.768  | 90             | 71   | 71   | 13   | -44  | 2.34E-6 | 1.71E-5   | > 1.00E-4 |
| MDA-MB-468                        | 0.702     | 1.363               | 1.339                  | 0.892 | 0.866 | 0.790 | 0.451  | 96             | 29   | 25   | 13   | -36  | 4.85E-8 | 1.87E-5   | > 1.00E-4 |



# Compound 5e

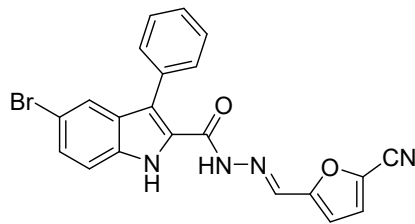

National Cancer Institute Developmental Therapeutics Program  
Dose Response Curves

NSC: D - 838296 / 1  
Report Date: June 22, 2023

SSPL: 1BCH

EXP. ID: 2305RS30

Test Date: May 15, 2023

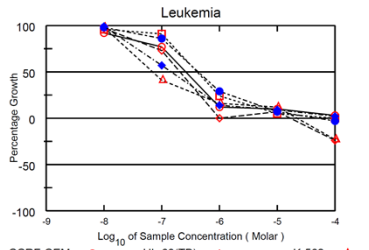

CCRF-CEM  
MOLT-4  
HL-60(TB)  
RPMI-8226  
K-562  
SR

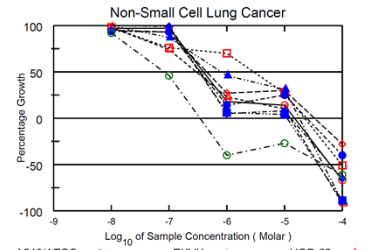

A549/ATCC  
HOP-92  
NCI-H322M  
EKV2  
NCI-H228  
NCI-H460  
HOP-62  
NCI-H23  
NCI-H522

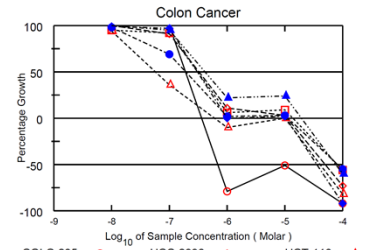

COLO 205  
HCT-15  
SW-620  
HCC-2998  
HT29  
HCT-116  
KM12

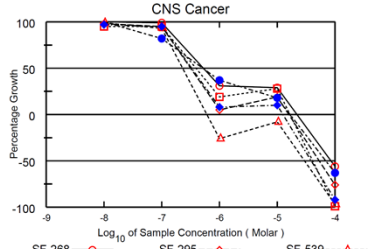

SF-268  
SNB-19  
SF-295  
SNB-75  
SF-539  
U251

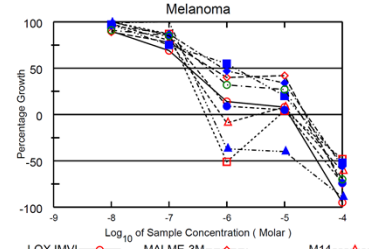

LOX IMVI  
MDA-MB-435  
SK-MEL-5  
MALME-3M  
SK-MEL-2  
UACC-257  
M14  
SK-MEL-28  
UACC-62

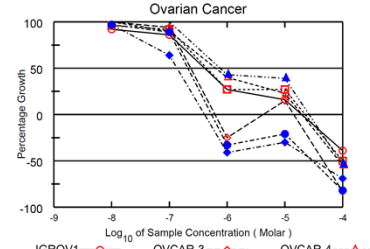

IGROV1  
OVCAR-5  
SK-OV-3  
OVCAR-3  
OVCAR-8  
NCI/ADR-RES  
OVCAR-4

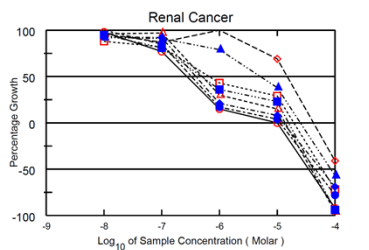

786-0  
CAKI-1  
TK-10  
A498  
RXF-393  
H7c-11  
ACHN  
SN12C

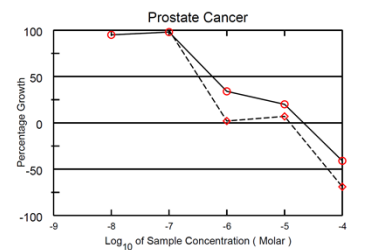

PC-3  
DU-145

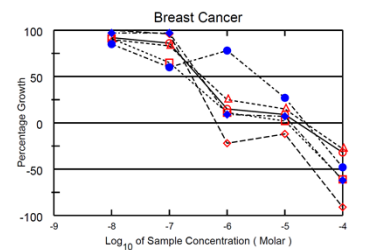

MCF7  
BT-549  
MDA-MB-231  
T-47D  
HS 578T  
MDA-MB-468

## National Cancer Institute Developmental Therapeutics Program In-Vitro Testing Results

|                             |                                       |                |               |
|-----------------------------|---------------------------------------|----------------|---------------|
| NSC : D - 838296 / 1        | Experiment ID : 2305RS30              | Test Type : 08 | Units : Molar |
| Report Date : June 22, 2023 | Test Date : May 15, 2023              | QNS :          | MC :          |
| COMI : TO25                 | Stain Reagent : SRB Dual-Pass Related | SSPL : 1BCH    |               |

| Panel/Cell Line                   | Log10 Concentration |       |                        |       |       |       |       |      |                |      |      |      |         |           |           |      |
|-----------------------------------|---------------------|-------|------------------------|-------|-------|-------|-------|------|----------------|------|------|------|---------|-----------|-----------|------|
|                                   | Time                |       | Mean Optical Densities |       |       |       |       |      | Percent Growth |      |      |      |         | GI50      | TGI       | LC50 |
|                                   | Zero                | Ctrl  | -8.0                   | -7.0  | -6.0  | -5.0  | -4.0  | -8.0 | -7.0           | -6.0 | -5.0 | -4.0 |         |           |           |      |
| <b>Leukemia</b>                   |                     |       |                        |       |       |       |       |      |                |      |      |      |         |           |           |      |
| CCRF-CEM                          | 0.413               | 2.527 | 2.358                  | 2.050 | 0.677 | 0.622 | 0.476 | 92   | 77             | 12   | 10   | 3    | 2.65E-7 | > 1.00E-4 | > 1.00E-4 |      |
| HL-60(TB)                         | 0.657               | 2.218 | 2.173                  | 1.794 | 0.661 | 0.761 | 0.501 | 97   | 73             | 0    | 7    | -24  | 2.06E-7 | 1.65E-5   | > 1.00E-4 |      |
| K-562                             | 0.182               | 1.793 | 1.758                  | 0.841 | 0.443 | 0.371 | 0.140 | 98   | 41             | 16   | 12   | -23  | 6.92E-8 | 2.17E-5   | > 1.00E-4 |      |
| MOLT-4                            | 0.574               | 2.633 | 2.560                  | 2.453 | 1.066 | 0.671 | 0.571 | 96   | 91             | 24   | 5    | 0    | 4.10E-7 | 7.67E-5   | > 1.00E-4 |      |
| RPMI-8226                         | 0.836               | 2.801 | 2.764                  | 2.516 | 1.397 | 0.969 | 0.813 | 98   | 86             | 29   | 7    | -3   | 4.20E-7 | 5.14E-5   | > 1.00E-4 |      |
| SR                                | 0.216               | 1.152 | 1.139                  | 0.745 | 0.352 | 0.303 | 0.235 | 99   | 57             | 14   | 9    | 2    | 1.43E-7 | > 1.00E-4 | > 1.00E-4 |      |
| <b>Non-Small Cell Lung Cancer</b> |                     |       |                        |       |       |       |       |      |                |      |      |      |         |           |           |      |
| A549/ATCC                         | 0.276               | 1.921 | 1.877                  | 1.868 | 0.572 | 0.513 | 0.091 | 97   | 97             | 18   | 14   | -67  | 3.93E-7 | 1.50E-5   | 6.15E-5   |      |
| EKVX                              | 0.969               | 2.457 | 2.379                  | 2.356 | 1.375 | 1.415 | 0.694 | 95   | 93             | 27   | 30   | -28  | 4.52E-7 | 3.26E-5   | > 1.00E-4 |      |
| HOP-62                            | 0.630               | 1.962 | 1.942                  | 1.615 | 0.931 | 0.765 | 0.050 | 98   | 74             | 23   | 10   | -92  | 2.92E-7 | 1.26E-5   | 3.87E-5   |      |
| HOP-92                            | 1.221               | 1.921 | 1.909                  | 1.754 | 1.708 | 1.410 | 0.599 | 98   | 76             | 70   | 27   | -51  | 2.87E-6 | 2.22E-5   | 9.71E-5   |      |
| NCI-H226                          | 1.449               | 2.895 | 2.803                  | 2.798 | 1.650 | 1.808 | 0.869 | 94   | 93             | 14   | 25   | -40  | 3.51E-7 | 2.41E-5   | > 1.00E-4 |      |
| NCI-H23                           | 0.527               | 1.785 | 1.791                  | 1.769 | 0.596 | 0.623 | 0.187 | 100  | 99             | 5    | 8    | -65  | 3.33E-7 | 1.27E-5   | 6.29E-5   |      |
| NCI-H322M                         | 0.462               | 1.558 | 1.631                  | 1.412 | 0.966 | 0.805 | 0.045 | 107  | 87             | 46   | 31   | -90  | 7.97E-7 | 1.81E-5   | 4.66E-5   |      |
| NCI-H460                          | 0.320               | 2.910 | 3.036                  | 2.960 | 0.469 | 0.423 | 0.036 | 105  | 102            | 6    | 4    | -89  | 3.47E-7 | 1.10E-5   | 3.82E-5   |      |
| NCI-H522                          | 1.140               | 2.757 | 2.633                  | 1.887 | 0.681 | 0.832 | 0.449 | 92   | 46             | -40  | -27  | -61  | 8.26E-8 | 3.42E-7   | 4.83E-5   |      |
| <b>Colon Cancer</b>               |                     |       |                        |       |       |       |       |      |                |      |      |      |         |           |           |      |
| COLO 205                          | 0.501               | 2.023 | 2.103                  | 2.097 | 0.103 | 0.247 | 0.042 | 105  | 105            | -79  | -51  | -92  | 1.98E-7 | 3.71E-7   | 6.92E-7   |      |
| HCC-2998                          | 0.609               | 2.260 | 2.325                  | 2.118 | 0.794 | 0.661 | 0.166 | 104  | 91             | 11   | 3    | -73  | 3.28E-7 | 1.10E-5   | 5.02E-5   |      |
| HCT-116                           | 0.357               | 2.770 | 2.626                  | 1.238 | 0.323 | 0.365 | 0.063 | 94   | 36             | -10  | 0    | -82  | 5.83E-8 | .         | 4.05E-5   |      |
| HCT-15                            | 0.297               | 2.404 | 2.304                  | 2.234 | 0.434 | 0.485 | 0.130 | 95   | 92             | 6    | 9    | -56  | 3.10E-7 | 1.37E-5   | 8.02E-5   |      |
| HT29                              | 0.201               | 1.536 | 1.510                  | 1.119 | 0.229 | 0.235 | 0.090 | 98   | 69             | 2    | 3    | -55  | 1.91E-7 | 1.11E-5   | 8.12E-5   |      |
| KM12                              | 0.493               | 2.558 | 2.542                  | 2.503 | 0.497 | 0.542 | 0.038 | 99   | 97             | 0    | 2    | -92  | 3.07E-7 | 1.06E-5   | 3.57E-5   |      |
| SW-620                            | 0.292               | 2.155 | 2.210                  | 2.062 | 0.705 | 0.748 | 0.118 | 103  | 95             | 22   | 24   | -60  | 4.15E-7 | 1.95E-5   | 7.69E-5   |      |
| <b>CNS Cancer</b>                 |                     |       |                        |       |       |       |       |      |                |      |      |      |         |           |           |      |
| SF-268                            | 0.699               | 2.074 | 2.106                  | 2.063 | 1.119 | 1.094 | 0.308 | 102  | 99             | 31   | 29   | -56  | 5.21E-7 | 2.18E-5   | 8.51E-5   |      |
| SF-295                            | 0.865               | 2.624 | 2.597                  | 2.535 | 0.950 | 1.193 | 0.204 | 98   | 95             | 5    | 19   | -76  | 3.15E-7 | 1.57E-5   | 5.27E-5   |      |
| SF-539                            | 0.600               | 2.014 | 1.999                  | 1.921 | 0.442 | 0.553 | 0.017 | 99   | 93             | -26  | -8   | -97  | 2.30E-7 | 6.02E-7   | 2.96E-5   |      |
| SNB-19                            | 0.390               | 1.462 | 1.409                  | 1.408 | 0.590 | 0.691 | 0.003 | 95   | 95             | 19   | 28   | -99  | 3.88E-7 | 1.66E-5   | 4.10E-5   |      |
| SNB-75                            | 1.575               | 2.691 | 2.893                  | 2.489 | 1.986 | 1.780 | 0.579 | 118  | 82             | 37   | 18   | -63  | 5.09E-7 | 1.68E-5   | 6.88E-5   |      |
| U251                              | 0.312               | 1.702 | 1.656                  | 1.630 | 0.430 | 0.456 | 0.026 | 97   | 95             | 8    | 10   | -92  | 3.30E-7 | 1.26E-5   | 3.90E-5   |      |
| <b>Melanoma</b>                   |                     |       |                        |       |       |       |       |      |                |      |      |      |         |           |           |      |
| LOX IMVI                          | 0.388               | 2.507 | 2.290                  | 1.857 | 0.677 | 0.550 | 0.020 | 90   | 69             | 14   | 8    | -95  | 2.22E-7 | 1.19E-5   | 3.65E-5   |      |
| MALME-3M                          | 0.537               | 1.249 | 1.172                  | 1.092 | 0.820 | 0.833 | 0.137 | 89   | 78             | 40   | 42   | -75  | 5.37E-7 | 2.28E-5   | 6.14E-5   |      |
| M14                               | 0.479               | 1.584 | 1.564                  | 1.360 | 0.438 | 0.567 | 0.188 | 98   | 80             | -9   | 8    | -61  | 2.17E-7 | .         | 6.95E-5   |      |
| MDA-MB-435                        | 0.492               | 2.647 | 2.636                  | 2.366 | 0.244 | 0.581 | 0.258 | 100  | 87             | -51  | 4    | -48  | 1.86E-7 | .         | .         |      |
| SK-MEL-2                          | 1.018               | 2.499 | 2.492                  | 2.274 | 1.158 | 1.086 | 0.262 | 100  | 85             | 9    | 5    | -74  | 2.89E-7 | 1.14E-5   | 4.92E-5   |      |
| SK-MEL-28                         | 0.538               | 1.709 | 1.665                  | 1.553 | 1.089 | 0.935 | 0.236 | 96   | 87             | 47   | 34   | -56  | 8.41E-7 | 2.38E-5   | 8.55E-5   |      |
| SK-MEL-5                          | 1.129               | 3.336 | 3.318                  | 3.330 | 0.712 | 0.673 | 0.120 | 99   | 100            | -37  | -40  | -89  | 2.31E-7 | 5.36E-7   | 1.57E-5   |      |
| UACC-257                          | 0.944               | 2.190 | 2.150                  | 1.874 | 1.625 | 1.196 | 0.454 | 97   | 75             | 55   | 20   | -52  | 1.36E-6 | 1.91E-5   | 9.41E-5   |      |
| UACC-62                           | 0.783               | 2.342 | 2.201                  | 2.106 | 1.289 | 1.209 | 0.233 | 91   | 85             | 32   | 27   | -70  | 4.62E-7 | 1.90E-5   | 6.20E-5   |      |
| <b>Ovarian Cancer</b>             |                     |       |                        |       |       |       |       |      |                |      |      |      |         |           |           |      |
| IGROV1                            | 0.375               | 2.208 | 2.055                  | 1.948 | 0.877 | 0.663 | 0.229 | 92   | 86             | 27   | 16   | -39  | 4.10E-7 | 1.94E-5   | > 1.00E-4 |      |
| OVCAR-3                           | 0.595               | 1.902 | 1.897                  | 1.825 | 0.445 | 0.791 | 0.101 | 100  | 94             | -25  | 15   | -83  | 2.34E-7 | .         | 4.60E-5   |      |
| OVCAR-4                           | 0.639               | 1.738 | 1.737                  | 1.624 | 1.083 | 0.891 | 0.290 | 100  | 90             | 40   | 23   | -55  | 6.37E-7 | 1.97E-5   | 8.70E-5   |      |
| OVCAR-5                           | 0.455               | 1.234 | 1.199                  | 1.169 | 0.662 | 0.664 | 0.226 | 96   | 92             | 27   | 27   | -50  | 4.36E-7 | 2.22E-5   | 9.87E-5   |      |
| OVCAR-8                           | 0.416               | 2.260 | 2.209                  | 2.058 | 0.280 | 0.329 | 0.075 | 97   | 89             | -33  | -21  | -82  | 2.09E-7 | 5.39E-7   | 2.98E-5   |      |
| NCI/ADR-RES                       | 0.420               | 1.609 | 1.572                  | 1.178 | 0.250 | 0.296 | 0.130 | 97   | 64             | -41  | -30  | -69  | 1.36E-7 | 4.08E-7   | 3.28E-5   |      |
| SK-OV-3                           | 1.211               | 2.171 | 2.181                  | 2.173 | 1.628 | 1.589 | 0.561 | 101  | 100            | 43   | 39   | -54  | 7.64E-7 | 2.65E-5   | 9.13E-5   |      |
| <b>Renal Cancer</b>               |                     |       |                        |       |       |       |       |      |                |      |      |      |         |           |           |      |
| 786-0                             | 0.839               | 2.687 | 2.655                  | 2.264 | 1.108 | 0.837 | 0.064 | 98   | 77             | 15   | 0    | -92  | 2.71E-7 | 9.55E-6   | 3.46E-5   |      |
| A498                              | 1.844               | 2.494 | 2.469                  | 2.408 | 2.574 | 2.291 | 1.097 | 96   | 87             | 112  | 69   | -41  | 1.48E-5 | 4.26E-5   | > 1.00E-4 |      |
| ACHN                              | 0.360               | 1.715 | 1.657                  | 1.678 | 0.764 | 0.563 | 0.015 | 96   | 97             | 30   | 15   | -96  | 5.01E-7 | 1.36E-5   | 3.85E-5   |      |
| CAKI-1                            | 0.667               | 2.166 | 1.991                  | 1.899 | 1.305 | 1.099 | 0.185 | 88   | 82             | 43   | 29   | -72  | 6.48E-7 | 1.93E-5   | 6.02E-5   |      |
| RXF 393                           | 1.213               | 1.966 | 1.977                  | 1.852 | 1.341 | 1.243 | 0.262 | 101  | 85             | 17   | 4    | -78  | 3.26E-7 | 1.12E-5   | 4.52E-5   |      |
| SN12C                             | 0.986               | 3.016 | 2.877                  | 2.844 | 1.413 | 1.142 | 0.304 | 93   | 92             | 21   | 8    | -69  | 3.88E-7 | 1.26E-5   | 5.62E-5   |      |
| TK-10                             | 1.156               | 2.466 | 2.367                  | 2.354 | 2.193 | 1.656 | 0.495 | 92   | 91             | 79   | 38   | -57  | 5.14E-6 | 2.51E-5   | 8.41E-5   |      |
| UO-31                             | 0.340               | 1.380 | 1.330                  | 1.178 | 0.718 | 0.581 | 0.021 | 95   | 81             | 36   | 23   | -94  | 4.91E-7 | 1.58E-5   | 4.21E-5   |      |
| <b>Prostate Cancer</b>            |                     |       |                        |       |       |       |       |      |                |      |      |      |         |           |           |      |
| PC-3                              | 0.715               | 2.344 | 2.256                  | 2.319 | 1.266 | 1.042 | 0.425 | 95   | 98             | 34   | 20   | -41  | 5.62E-7 | 2.14E-5   | > 1.00E-4 |      |
| DU-145                            | 0.393               | 1.765 | 1.803                  | 1.768 | 0.425 | 0.486 | 0.122 | 103  | 100            | 2    | 7    | -69  | 3.26E-7 | 1.23E-5   | 5.62E-5   |      |
| <b>Breast Cancer</b>              |                     |       |                        |       |       |       |       |      |                |      |      |      |         |           |           |      |
| MCF7                              | 0.445               | 2.551 | 2.389                  | 2.257 | 0.771 | 0.630 | 0.304 | 92   | 86             | 15   | 9    | -32  | 3.24E-7 | 1.64E-5   | > 1.00E-4 |      |
| MDA-MB-231/ATCC                   | 0.533               | 1.131 | 1.137                  | 1.107 | 0.418 | 0.468 | 0.046 | 101  | 96             | -22  | -12  | -91  | 2.46E-7 | 6.55E-7   | 3.00E-5   |      |
| HS 578T                           | 1.396               | 2.486 | 2.373                  | 2.297 | 1.666 | 1.558 | 1.006 | 90   | 83             | 25   | 15   | -28  | 3.66E-7 | 2.22E-5   | > 1.00E-4 |      |
| BT-549                            | 1.037               | 1.988 | 1.900                  | 1.659 | 1.142 | 1.055 | 0.408 | 91   | 65             | 11   | 2    | -61  | 1.92E-7 | 1.07E-5   | 6.75E-5   |      |
| T-47D                             | 0.638               | 1.478 | 1.350                  | 1.146 | 1.292 | 0.862 | 0.333 | 85   | 60             | 78   | 27   | -48  | 3.50E-6 | 2.28E-5   | > 1.00E-4 |      |
| MDA-MB-468                        | 1.036               | 2.440 | 2.405                  | 2.396 | 1.161 | 1.141 | 0.390 | 97   | 97             | 9    | 7    | -62  | 3.41E-7 | 1.28E-5   | 6.64E-5   |      |

# Compound 5f

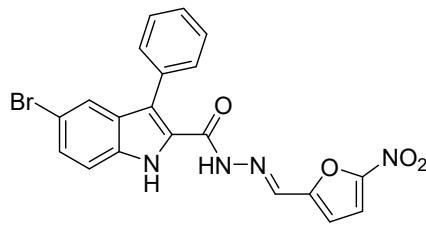

National Cancer Institute Developmental Therapeutics Program  
Dose Response Curves

NSC: D - 832483 / 1  
Report Date: January 25, 2022

SSPL: 1BCH  
Test Date: November 29, 2021

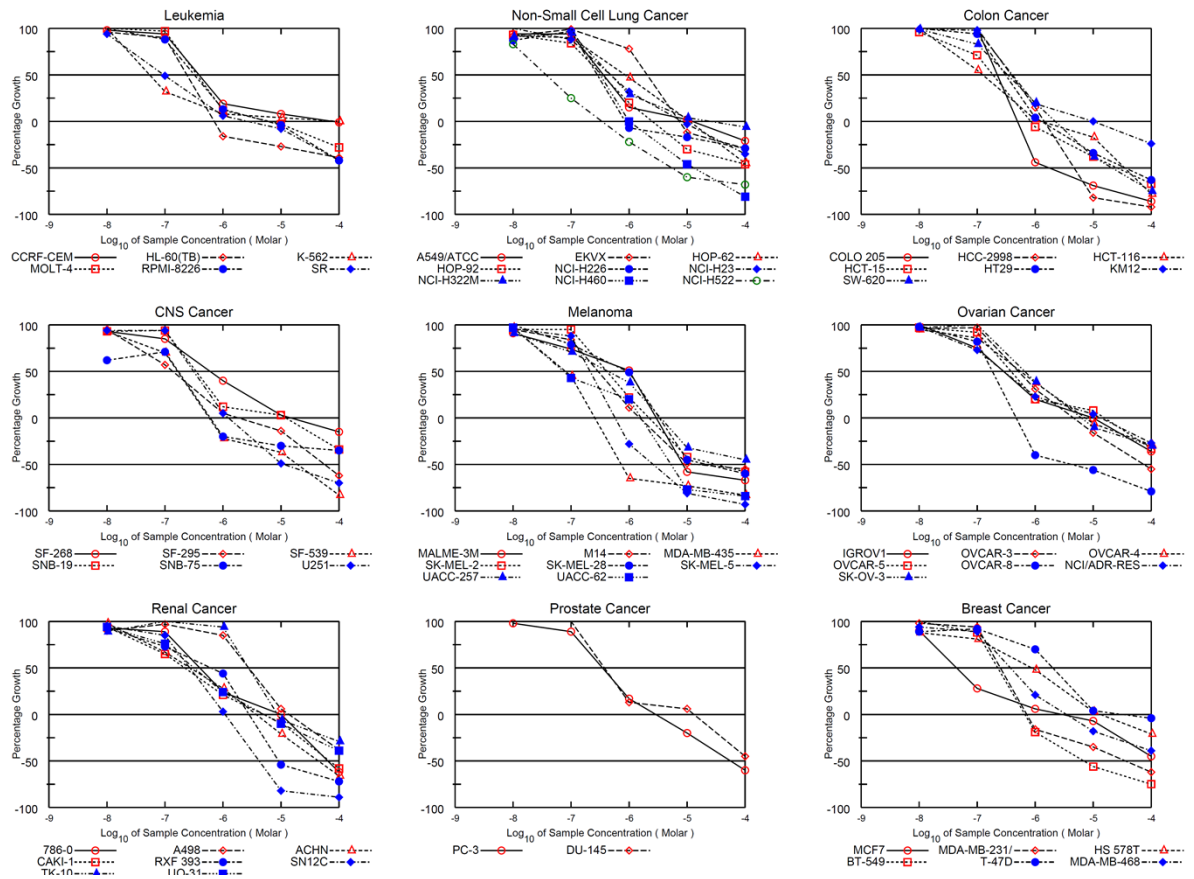

### National Cancer Institute Developmental Therapeutics Program In-Vitro Testing Results

| NSC : D - 832483 / 1              |           | Experiment ID : 2111NS16              |                        |       |       |       |       |                |      |      |      | Test Type : 08 |         | Units : Molar |           |
|-----------------------------------|-----------|---------------------------------------|------------------------|-------|-------|-------|-------|----------------|------|------|------|----------------|---------|---------------|-----------|
| Report Date : January 25, 2022    |           | Test Date : November 29, 2021         |                        |       |       |       |       |                |      |      |      | QNS :          |         | MC :          |           |
| COMI : TO9                        |           | Stain Reagent : SRB Dual-Pass Related |                        |       |       |       |       |                |      |      |      | SSPL : 1BCH    |         |               |           |
| Log10 Concentration               |           |                                       |                        |       |       |       |       |                |      |      |      |                |         |               |           |
| Panel/Cell Line                   | Time Zero | Ctrl                                  | Mean Optical Densities |       |       |       |       | Percent Growth |      |      |      |                | GI50    | TGI           | LC50      |
|                                   |           |                                       | -8.0                   | -7.0  | -6.0  | -5.0  | -4.0  | -8.0           | -7.0 | -6.0 | -5.0 | -4.0           |         |               |           |
| <b>Leukemia</b>                   |           |                                       |                        |       |       |       |       |                |      |      |      |                |         |               |           |
| CCRF-CEM                          | 0.530     | 2.665                                 | 2.625                  | 2.544 | 0.933 | 0.698 | 0.523 | 98             | 94   | 19   | 8    | -1             | 3.87E-7 | 7.18E-5       | > 1.00E-4 |
| HL-60(TB)                         | 0.572     | 2.569                                 | 2.495                  | 2.367 | 0.479 | 0.419 | 0.352 | 96             | 90   | -16  | -27  | -39            | 2.37E-7 | 7.02E-7       | > 1.00E-4 |
| K-562                             | 0.154     | 1.747                                 | 1.741                  | 0.665 | 0.282 | 0.211 | 0.156 | 100            | 32   | 8    | 4    | 0              | 5.43E-8 | > 1.00E-4     | > 1.00E-4 |
| MOLT-4                            | 0.590     | 2.391                                 | 2.467                  | 2.335 | 0.801 | 0.575 | 0.427 | 104            | 97   | 12   | -3   | -28            | 3.55E-7 | 6.56E-6       | > 1.00E-4 |
| RPMI-8226                         | 0.581     | 2.656                                 | 2.667                  | 2.405 | 0.841 | 0.555 | 0.339 | 101            | 88   | 13   | -4   | -42            | 3.18E-7 | 5.46E-6       | > 1.00E-4 |
| SR                                | 0.371     | 1.711                                 | 1.626                  | 1.028 | 0.450 | 0.342 | 0.214 | 94             | 49   | 6    | -8   | -42            | 9.50E-8 | 2.66E-6       | > 1.00E-4 |
| <b>Non-Small Cell Lung Cancer</b> |           |                                       |                        |       |       |       |       |                |      |      |      |                |         |               |           |
| A549/ATCC                         | 0.337     | 2.057                                 | 1.959                  | 1.953 | 0.601 | 0.367 | 0.267 | 94             | 94   | 15   | 2    | -21            | 3.62E-7 | 1.20E-5       | > 1.00E-4 |
| EKVX                              | 1.027     | 1.899                                 | 1.827                  | 1.893 | 1.707 | 0.904 | 0.733 | 92             | 99   | 78   | -12  | -29            | 2.04E-6 | 7.36E-6       | > 1.00E-4 |
| HOP-62                            | 0.707     | 1.861                                 | 1.765                  | 1.747 | 1.245 | 0.727 | 0.388 | 92             | 90   | 47   | 2    | -45            | 8.35E-7 | 1.09E-5       | > 1.00E-4 |
| HOP-92                            | 1.244     | 2.003                                 | 1.948                  | 1.885 | 1.396 | 0.877 | 0.668 | 93             | 84   | 20   | -30  | -46            | 3.42E-7 | 2.53E-6       | > 1.00E-4 |
| NCI-H226                          | 0.822     | 1.484                                 | 1.398                  | 1.463 | 0.767 | 0.681 | 0.582 | 87             | 97   | -7   | -17  | -29            | 2.83E-7 | 8.62E-7       | > 1.00E-4 |
| NCI-H23                           | 0.419     | 1.409                                 | 1.439                  | 1.293 | 0.736 | 0.406 | 0.273 | 103            | 88   | 32   | -3   | -35            | 4.78E-7 | 8.16E-6       | > 1.00E-4 |
| NCI-H322M                         | 0.810     | 2.031                                 | 1.922                  | 1.976 | 1.159 | 0.859 | 0.758 | 91             | 95   | 29   | 4    | -6             | 4.78E-7 | 2.42E-5       | > 1.00E-4 |
| NCI-H460                          | 0.323     | 2.981                                 | 3.001                  | 2.969 | 0.323 | 0.175 | 0.060 | 101            | 100  | 0    | -46  | -81            | 3.15E-7 | 1.00E-6       | 1.31E-5   |
| NCI-H522                          | 1.038     | 2.415                                 | 2.188                  | 1.383 | 0.815 | 0.411 | 0.333 | 83             | 25   | -22  | -60  | -68            | 3.74E-8 | 3.45E-7       | 5.39E-6   |
| <b>Colon Cancer</b>               |           |                                       |                        |       |       |       |       |                |      |      |      |                |         |               |           |
| COLO 205                          | 0.628     | 2.581                                 | 2.588                  | 2.671 | 0.354 | 0.197 | 0.087 | 100            | 105  | -44  | -69  | -86            | 2.33E-7 | 5.07E-7       | 1.79E-6   |
| HCC-2998                          | 0.495     | 1.572                                 | 1.575                  | 1.653 | 0.659 | 0.090 | 0.039 | 100            | 107  | 15   | -82  | -92            | 4.20E-7 | 1.44E-6       | 4.70E-6   |
| HCT-116                           | 0.226     | 2.512                                 | 2.560                  | 1.492 | 0.276 | 0.187 | 0.051 | 102            | 55   | 2    | -17  | -78            | 1.26E-7 | 1.29E-6       | 3.47E-5   |
| HCT-15                            | 0.217     | 1.407                                 | 1.363                  | 1.057 | 0.204 | 0.134 | 0.073 | 96             | 71   | -6   | -38  | -67            | 1.85E-7 | 8.30E-7       | 2.57E-5   |
| HT29                              | 0.373     | 2.425                                 | 2.433                  | 2.298 | 0.455 | 0.247 | 0.137 | 100            | 94   | 4    | -34  | -63            | 3.07E-7 | 1.27E-6       | 3.53E-5   |
| KM12                              | 0.833     | 3.358                                 | 3.344                  | 3.297 | 1.305 | 0.838 | 0.630 | 99             | 98   | 19   | 0    | -24            | 4.01E-7 | 1.02E-5       | > 1.00E-4 |
| SW-620                            | 0.333     | 2.474                                 | 2.456                  | 2.112 | 0.751 | 0.207 | 0.084 | 99             | 83   | 20   | -38  | -75            | 3.31E-7 | 2.19E-6       | 2.13E-5   |
| <b>CNS Cancer</b>                 |           |                                       |                        |       |       |       |       |                |      |      |      |                |         |               |           |
| SF-268                            | 1.079     | 2.928                                 | 2.798                  | 2.654 | 1.822 | 1.131 | 0.915 | 93             | 85   | 40   | 3    | -15            | 6.05E-7 | 1.43E-5       | > 1.00E-4 |
| SF-295                            | 0.472     | 1.839                                 | 1.765                  | 1.257 | 0.539 | 0.407 | 0.180 | 95             | 57   | 5    | -14  | -62            | 1.38E-7 | 1.83E-6       | 5.67E-5   |
| SF-539                            | 0.563     | 1.841                                 | 1.747                  | 1.453 | 0.437 | 0.356 | 0.097 | 93             | 70   | -22  | -37  | -83            | 1.63E-7 | 5.71E-7       | 1.94E-5   |
| SNB-19                            | 0.527     | 1.876                                 | 1.785                  | 1.799 | 0.686 | 0.572 | 0.346 | 93             | 94   | 12   | 3    | -34            | 3.44E-7 | 1.22E-5       | > 1.00E-4 |
| SNB-75                            | 2.216     | 3.125                                 | 2.784                  | 2.863 | 1.775 | 1.547 | 1.437 | 62             | 71   | -20  | -30  | -35            | 1.71E-7 | 6.05E-7       | > 1.00E-4 |
| U251                              | 0.581     | 2.759                                 | 2.626                  | 2.625 | 0.695 | 0.296 | 0.177 | 94             | 94   | 5    | -49  | -70            | 3.12E-7 | 1.25E-6       | 1.10E-5   |
| <b>Melanoma</b>                   |           |                                       |                        |       |       |       |       |                |      |      |      |                |         |               |           |
| MALME-3M                          | 0.726     | 1.503                                 | 1.434                  | 1.305 | 1.125 | 0.306 | 0.242 | 91             | 74   | 51   | -58  | -67            | 1.03E-6 | 2.95E-6       | 8.47E-6   |
| M14                               | 0.470     | 2.111                                 | 2.024                  | 1.844 | 0.645 | 0.241 | 0.212 | 95             | 84   | 11   | -49  | -55            | 2.89E-7 | 1.51E-6       | 1.56E-5   |
| MDA-MB-435                        | 0.779     | 3.069                                 | 3.002                  | 1.814 | 0.275 | 0.209 | 0.133 | 97             | 45   | -65  | -73  | -83            | 8.08E-8 | 2.58E-7       | 7.34E-7   |
| SK-MEL-2                          | 1.232     | 2.623                                 | 2.553                  | 2.551 | 1.538 | 0.717 | 0.518 | 95             | 95   | 22   | -42  | -58            | 4.12E-7 | 2.21E-6       | 3.22E-5   |
| SK-MEL-28                         | 0.523     | 1.735                                 | 1.743                  | 1.475 | 1.116 | 0.289 | 0.210 | 101            | 79   | 49   | -45  | -60            | 9.21E-7 | 3.33E-6       | 2.23E-5   |
| SK-MEL-5                          | 0.640     | 2.714                                 | 2.623                  | 2.464 | 0.464 | 0.121 | 0.043 | 96             | 88   | -28  | -81  | -93            | 2.13E-7 | 5.77E-7       | 2.62E-6   |
| UACC-257                          | 0.948     | 2.541                                 | 2.397                  | 2.074 | 1.560 | 0.644 | 0.517 | 91             | 71   | 38   | -32  | -45            | 4.37E-7 | 3.50E-6       | > 1.00E-4 |
| UACC-62                           | 0.837     | 2.882                                 | 2.812                  | 1.709 | 1.247 | 0.194 | 0.136 | 97             | 43   | 20   | -77  | -84            | 7.31E-8 | 1.61E-6       | 5.29E-6   |
| <b>Ovarian Cancer</b>             |           |                                       |                        |       |       |       |       |                |      |      |      |                |         |               |           |
| IGROV1                            | 0.501     | 2.168                                 | 2.161                  | 1.755 | 0.832 | 0.502 | 0.322 | 100            | 75   | 20   | 0    | -36            | 2.85E-7 | 1.00E-5       | > 1.00E-4 |
| OVCAR-3                           | 1.057     | 2.887                                 | 2.815                  | 2.835 | 1.618 | 0.888 | 0.479 | 96             | 97   | 31   | -16  | -55            | 5.12E-7 | 4.53E-6       | 7.57E-5   |
| OVCAR-4                           | 0.841     | 1.929                                 | 1.877                  | 1.773 | 1.251 | 0.793 | 0.596 | 95             | 86   | 38   | -6   | -29            | 5.53E-7 | 7.36E-6       | > 1.00E-4 |
| OVCAR-5                           | 0.567     | 1.795                                 | 1.753                  | 1.703 | 0.808 | 0.664 | 0.381 | 97             | 92   | 20   | 8    | -33            | 3.83E-7 | 1.56E-5       | > 1.00E-4 |
| OVCAR-8                           | 0.512     | 2.597                                 | 2.557                  | 2.231 | 0.307 | 0.225 | 0.109 | 98             | 82   | -40  | -56  | -79            | 1.84E-7 | 4.71E-7       | 4.19E-6   |
| NCI/ADR-RES                       | 0.370     | 1.334                                 | 1.316                  | 1.071 | 0.592 | 0.404 | 0.269 | 98             | 73   | 23   | 4    | -27            | 2.86E-7 | 1.30E-5       | > 1.00E-4 |
| SK-OV-3                           | 0.967     | 1.814                                 | 1.787                  | 1.839 | 1.296 | 0.870 | 0.677 | 97             | 103  | 39   | -10  | -30            | 6.69E-7 | 6.23E-6       | > 1.00E-4 |
| <b>Renal Cancer</b>               |           |                                       |                        |       |       |       |       |                |      |      |      |                |         |               |           |
| 786-0                             | 0.578     | 2.526                                 | 2.395                  | 2.312 | 1.044 | 0.580 | 0.222 | 93             | 89   | 24   | 0    | -62            | 3.98E-7 | 1.00E-5       | 6.49E-5   |
| A498                              | 1.326     | 2.058                                 | 1.988                  | 2.035 | 1.950 | 1.367 | 0.824 | 90             | 97   | 85   | 6    | -38            | 2.77E-6 | 1.35E-5       | > 1.00E-4 |
| ACHN                              | 0.286     | 1.214                                 | 1.200                  | 0.912 | 0.547 | 0.225 | 0.097 | 98             | 67   | 28   | -21  | -66            | 2.78E-7 | 3.70E-6       | 4.35E-5   |
| CAKI-1                            | 0.680     | 2.232                                 | 2.135                  | 1.696 | 1.012 | 0.622 | 0.284 | 94             | 65   | 21   | -9   | -58            | 2.24E-7 | 5.17E-6       | 6.82E-5   |
| RXF 393                           | 0.651     | 1.199                                 | 1.160                  | 1.052 | 0.894 | 0.302 | 0.181 | 93             | 73   | 44   | -54  | -72            | 6.32E-7 | 2.83E-6       | 9.19E-6   |
| SN12C                             | 0.520     | 2.052                                 | 1.974                  | 1.822 | 0.569 | 0.096 | 0.058 | 95             | 85   | 3    | -82  | -89            | 2.68E-7 | 1.09E-6       | 4.24E-6   |
| TK-10                             | 1.216     | 2.054                                 | 1.959                  | 2.112 | 2.005 | 1.147 | 0.868 | 89             | 107  | 94   | -6   | -29            | 2.77E-6 | 8.77E-6       | > 1.00E-4 |
| UO-31                             | 0.500     | 2.114                                 | 2.011                  | 1.732 | 0.895 | 0.452 | 0.307 | 94             | 76   | 24   | -10  | -39            | 3.21E-7 | 5.22E-6       | > 1.00E-4 |
| <b>Prostate Cancer</b>            |           |                                       |                        |       |       |       |       |                |      |      |      |                |         |               |           |
| PC-3                              | 0.628     | 2.262                                 | 2.234                  | 2.087 | 0.901 | 0.505 | 0.251 | 98             | 89   | 17   | -20  | -60            | 3.48E-7 | 2.88E-6       | 5.64E-5   |
| DU-145                            | 0.333     | 1.680                                 | 1.708                  | 1.683 | 0.507 | 0.408 | 0.183 | 102            | 100  | 13   | 6    | -45            | 3.76E-7 | 1.29E-5       | > 1.00E-4 |
| <b>Breast Cancer</b>              |           |                                       |                        |       |       |       |       |                |      |      |      |                |         |               |           |
| MCF7                              | 0.186     | 0.934                                 | 0.856                  | 0.398 | 0.232 | 0.173 | 0.103 | 90             | 28   | 6    | -7   | -45            | 4.43E-8 | 2.88E-6       | > 1.00E-4 |
| MDA-MB-231/ATCC                   | 0.554     | 1.439                                 | 1.420                  | 1.387 | 0.465 | 0.362 | 0.213 | 98             | 94   | -16  | -35  | -62            | 2.51E-7 | 7.14E-7       | 3.70E-5   |
| HS 578T                           | 1.525     | 2.693                                 | 2.548                  | 2.469 | 2.082 | 1.564 | 1.204 | 88             | 81   | 48   | 3    | -21            | 8.50E-7 | 1.37E-5       | > 1.00E-4 |
| BT-549                            | 1.016     | 2.141                                 | 2.140                  | 2.007 | 0.825 | 0.449 | 0.258 | 100            | 88   | -19  | -56  | -75            | 2.27E-7 | 6.67E-7       | 6.95E-6   |
| T-47D                             | 1.368     | 3.156                                 | 2.955                  | 3.021 | 2.621 | 1.442 | 1.318 | 89             | 92   | 70   | 4    | -4             | 2.02E-6 | 3.38E-5       | > 1.00E-4 |
| MDA-MB-468                        | 0.702     | 1.375                                 | 1.335                  | 1.301 | 0.841 | 0.573 | 0.429 | 94             | 89   | 21   | -18  | -39            | 3.71E-7 | 3.38E-6       | > 1.00E-4 |

# Compound 5g

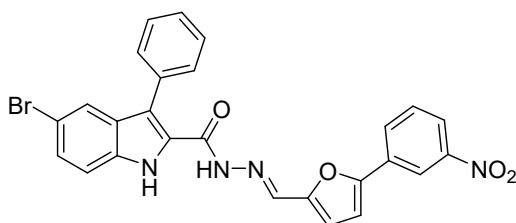

National Cancer Institute Developmental Therapeutics Program  
Dose Response Curves

NSC: D - 837020 / 1  
Report Date: August 09, 2022

SSPL: 1BCH | EXP. ID: 2206NS36  
Test Date: June 13, 2022

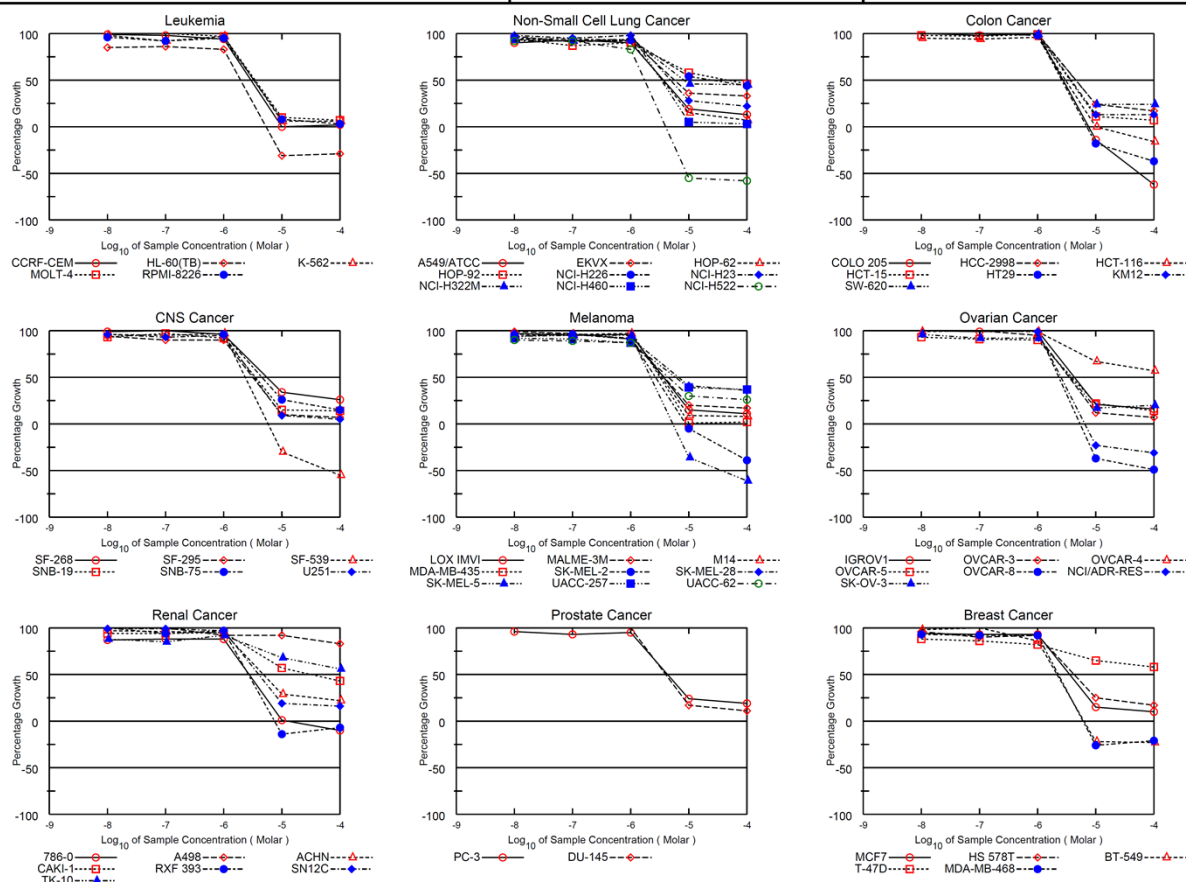



## National Cancer Institute Developmental Therapeutics Program In-Vitro Testing Results

| NSC : D - 837020 / 1              |           | Experiment ID : 2206NS36              |       |       |       |       |       |      |      |      |      | Test Type : 08 |           | Units : Molar |           |
|-----------------------------------|-----------|---------------------------------------|-------|-------|-------|-------|-------|------|------|------|------|----------------|-----------|---------------|-----------|
| Report Date : August 09, 2022     |           | Test Date : June 13, 2022             |       |       |       |       |       |      |      |      |      | QNS :          |           | MC :          |           |
| COMI : TO29                       |           | Stain Reagent : SRB Dual-Pass Related |       |       |       |       |       |      |      |      |      | SSPL : 1BCH    |           |               |           |
| Panel/Cell Line                   | Time Zero | Log10 Concentration                   |       |       |       |       |       |      |      |      |      | GI50           | TGI       | LC50          |           |
|                                   |           | Ctrl                                  | -8.0  | -7.0  | -6.0  | -5.0  | -4.0  | -8.0 | -7.0 | -6.0 | -5.0 |                |           |               | -4.0      |
| <b>Leukemia</b>                   |           |                                       |       |       |       |       |       |      |      |      |      |                |           |               |           |
| CCRF-CEM                          | 0.312     | 1.284                                 | 1.274 | 1.267 | 1.223 | 0.310 | 0.328 | 99   | 98   | 94   | 0    | 2              | 2.91E-6   | .             | > 1.00E-4 |
| HL-60(TB)                         | 0.547     | 2.566                                 | 2.268 | 2.274 | 2.219 | 0.376 | 0.388 | 85   | 86   | 83   | -31  | -29            | 1.94E-6   | 5.32E-6       | > 1.00E-4 |
| K-562                             | 0.189     | 1.791                                 | 1.763 | 1.668 | 1.750 | 0.278 | 0.286 | 98   | 92   | 97   | 6    | 6              | 3.28E-6   | > 1.00E-4     | > 1.00E-4 |
| MOLT-4                            | 0.602     | 2.287                                 | 2.325 | 2.292 | 2.238 | 0.763 | 0.715 | 102  | 100  | 97   | 10   | 7              | 3.45E-6   | > 1.00E-4     | > 1.00E-4 |
| RPMI-8226                         | 0.698     | 2.204                                 | 2.150 | 2.076 | 2.134 | 0.818 | 0.745 | 96   | 92   | 95   | 8    | 3              | 3.31E-6   | > 1.00E-4     | > 1.00E-4 |
| <b>Non-Small Cell Lung Cancer</b> |           |                                       |       |       |       |       |       |      |      |      |      |                |           |               |           |
| A549/ATCC                         | 0.528     | 2.431                                 | 2.236 | 2.306 | 2.242 | 0.890 | 0.781 | 90   | 93   | 90   | 19   | 13             | 3.66E-6   | > 1.00E-4     | > 1.00E-4 |
| EKVX                              | 0.666     | 2.096                                 | 2.051 | 1.965 | 1.990 | 1.188 | 1.137 | 97   | 91   | 93   | 36   | 33             | 5.74E-6   | > 1.00E-4     | > 1.00E-4 |
| HOP-62                            | 0.813     | 2.527                                 | 2.420 | 2.385 | 2.388 | 1.066 | 0.931 | 94   | 92   | 92   | 15   | 7              | 3.49E-6   | > 1.00E-4     | > 1.00E-4 |
| HOP-92                            | 0.979     | 1.654                                 | 1.613 | 1.568 | 1.588 | 1.368 | 1.291 | 94   | 87   | 90   | 58   | 46             | 4.61E-5   | > 1.00E-4     | > 1.00E-4 |
| NCI-H226                          | 0.679     | 1.733                                 | 1.681 | 1.668 | 1.663 | 1.245 | 1.140 | 95   | 94   | 93   | 54   | 44             | 2.35E-5   | > 1.00E-4     | > 1.00E-4 |
| NCI-H23                           | 0.517     | 1.608                                 | 1.583 | 1.553 | 1.582 | 0.827 | 0.755 | 98   | 95   | 98   | 28   | 22             | 4.87E-6   | > 1.00E-4     | > 1.00E-4 |
| NCI-H322M                         | 0.710     | 1.994                                 | 1.898 | 1.895 | 1.923 | 1.304 | 1.284 | 93   | 92   | 94   | 46   | 45             | 8.37E-6   | > 1.00E-4     | > 1.00E-4 |
| NCI-H460                          | 0.286     | 2.758                                 | 2.923 | 2.889 | 2.860 | 0.398 | 0.348 | 107  | 105  | 104  | 5    | 3              | 3.49E-6   | > 1.00E-4     | > 1.00E-4 |
| NCI-H522                          | 1.062     | 2.891                                 | 2.743 | 2.744 | 2.581 | 0.473 | 0.450 | 92   | 92   | 83   | -55  | -58            | 1.73E-6   | 3.98E-6       | 9.13E-6   |
| <b>Colon Cancer</b>               |           |                                       |       |       |       |       |       |      |      |      |      |                |           |               |           |
| COLO 205                          | 0.647     | 2.130                                 | 2.136 | 2.104 | 2.137 | 0.554 | 0.248 | 100  | 98   | 100  | -14  | -62            | 2.75E-6   | 7.49E-6       | 5.66E-5   |
| HCC-2998                          | 0.726     | 2.392                                 | 2.412 | 2.425 | 2.422 | 1.126 | 1.015 | 101  | 102  | 102  | 24   | 17             | 4.63E-6   | > 1.00E-4     | > 1.00E-4 |
| HCT-116                           | 0.298     | 2.892                                 | 2.570 | 2.555 | 2.608 | 0.305 | 0.250 | 95   | 94   | 96   | 0    | -16            | 3.04E-6   | 1.04E-5       | > 1.00E-4 |
| HCT-15                            | 0.333     | 2.300                                 | 2.255 | 2.235 | 2.284 | 0.542 | 0.473 | 98   | 97   | 99   | 11   | 7              | 3.59E-6   | > 1.00E-4     | > 1.00E-4 |
| HT29                              | 0.393     | 2.205                                 | 2.235 | 2.248 | 2.164 | 0.322 | 0.250 | 102  | 102  | 98   | -18  | -37            | 2.58E-6   | 6.97E-6       | > 1.00E-4 |
| KM12                              | 0.609     | 2.975                                 | 3.043 | 3.046 | 2.972 | 0.915 | 0.912 | 103  | 103  | 100  | 13   | 13             | 3.74E-6   | > 1.00E-4     | > 1.00E-4 |
| SW-620                            | 0.390     | 2.799                                 | 2.850 | 2.803 | 2.782 | 0.963 | 0.980 | 102  | 100  | 99   | 24   | 24             | 4.50E-6   | > 1.00E-4     | > 1.00E-4 |
| <b>CNS Cancer</b>                 |           |                                       |       |       |       |       |       |      |      |      |      |                |           |               |           |
| SF-268                            | 0.744     | 2.412                                 | 2.391 | 2.422 | 2.348 | 1.313 | 1.182 | 99   | 101  | 96   | 34   | 26             | 5.55E-6   | > 1.00E-4     | > 1.00E-4 |
| SF-295                            | 0.622     | 2.278                                 | 2.177 | 2.105 | 2.115 | 0.788 | 0.731 | 94   | 90   | 90   | 10   | 7              | 3.17E-6   | > 1.00E-4     | > 1.00E-4 |
| SF-539                            | 0.692     | 2.223                                 | 2.155 | 2.146 | 2.170 | 0.486 | 0.310 | 96   | 95   | 97   | -30  | -55            | 2.34E-6   | 5.81E-6       | 6.24E-5   |
| SNB-19                            | 0.533     | 1.856                                 | 1.764 | 1.821 | 1.744 | 0.729 | 0.718 | 93   | 97   | 92   | 15   | 14             | 3.48E-6   | > 1.00E-4     | > 1.00E-4 |
| SNB-75                            | 2.142     | 3.125                                 | 3.167 | 3.147 | 3.090 | 2.398 | 2.287 | 104  | 102  | 96   | 26   | 15             | 4.56E-6   | > 1.00E-4     | > 1.00E-4 |
| U251                              | 0.448     | 1.885                                 | 1.834 | 1.780 | 1.810 | 0.582 | 0.521 | 96   | 93   | 95   | 9    | 5              | 3.34E-6   | > 1.00E-4     | > 1.00E-4 |
| <b>Melanoma</b>                   |           |                                       |       |       |       |       |       |      |      |      |      |                |           |               |           |
| LOX IMVI                          | 0.365     | 1.979                                 | 1.936 | 1.902 | 1.907 | 0.615 | 0.548 | 97   | 95   | 96   | 15   | 11             | 3.71E-6   | > 1.00E-4     | > 1.00E-4 |
| MALME-3M                          | 0.664     | 1.599                                 | 1.587 | 1.567 | 1.512 | 0.852 | 0.827 | 99   | 97   | 91   | 20   | 17             | 3.77E-6   | > 1.00E-4     | > 1.00E-4 |
| M14                               | 0.490     | 1.945                                 | 1.881 | 1.882 | 1.902 | 0.622 | 0.608 | 96   | 96   | 97   | 9    | 8              | 3.43E-6   | > 1.00E-4     | > 1.00E-4 |
| MDA-MB-435                        | 0.679     | 3.071                                 | 3.124 | 3.140 | 3.062 | 0.714 | 0.737 | 102  | 103  | 100  | 1    | 2              | 3.20E-6   | > 1.00E-4     | > 1.00E-4 |
| SK-MEL-2                          | 1.159     | 2.034                                 | 1.978 | 1.998 | 1.954 | 1.105 | 0.712 | 94   | 96   | 91   | -5   | -39            | 2.68E-6   | 8.93E-6       | > 1.00E-4 |
| SK-MEL-28                         | 0.727     | 2.043                                 | 2.006 | 1.997 | 1.933 | 1.272 | 1.195 | 97   | 96   | 92   | 41   | 36             | 6.75E-6   | > 1.00E-4     | > 1.00E-4 |
| SK-MEL-5                          | 0.821     | 3.032                                 | 2.900 | 2.910 | 2.927 | 0.529 | 0.317 | 94   | 95   | 95   | -36  | -61            | 2.22E-6   | 5.34E-6       | 3.61E-5   |
| UACC-257                          | 1.131     | 2.410                                 | 2.305 | 2.291 | 2.244 | 1.624 | 1.603 | 92   | 91   | 87   | 39   | 37             | 5.79E-6   | > 1.00E-4     | > 1.00E-4 |
| UACC-62                           | 0.900     | 2.810                                 | 2.437 | 2.428 | 2.382 | 1.417 | 1.350 | 90   | 89   | 87   | 30   | 26             | 4.46E-6   | > 1.00E-4     | > 1.00E-4 |
| <b>Ovarian Cancer</b>             |           |                                       |       |       |       |       |       |      |      |      |      |                |           |               |           |
| IGROV1                            | 0.765     | 2.454                                 | 2.488 | 2.439 | 2.454 | 1.127 | 1.044 | 102  | 99   | 100  | 21   | 16             | 4.33E-6   | > 1.00E-4     | > 1.00E-4 |
| OVCAR-3                           | 0.386     | 1.486                                 | 1.683 | 1.556 | 1.435 | 0.513 | 0.463 | 118  | 106  | 95   | 12   | 7              | 3.47E-6   | > 1.00E-4     | > 1.00E-4 |
| OVCAR-4                           | 1.052     | 2.436                                 | 2.427 | 2.463 | 2.428 | 1.973 | 1.836 | 99   | 102  | 99   | 67   | 57             | > 1.00E-4 | > 1.00E-4     | > 1.00E-4 |
| OVCAR-5                           | 0.769     | 1.713                                 | 1.651 | 1.625 | 1.618 | 0.972 | 0.902 | 93   | 91   | 90   | 22   | 14             | 3.84E-6   | > 1.00E-4     | > 1.00E-4 |
| OVCAR-8                           | 0.427     | 1.792                                 | 1.846 | 1.814 | 1.856 | 0.271 | 0.219 | 104  | 102  | 105  | -37  | -49            | 2.44E-6   | 5.50E-6       | > 1.00E-4 |
| NCI/ADR-RES                       | 0.388     | 1.321                                 | 1.334 | 1.317 | 1.314 | 0.299 | 0.266 | 101  | 100  | 99   | -23  | -31            | 2.53E-6   | 6.49E-6       | > 1.00E-4 |
| SK-OV-3                           | 1.252     | 2.415                                 | 2.364 | 2.326 | 2.320 | 1.448 | 1.485 | 96   | 92   | 92   | 17   | 20             | 3.61E-6   | > 1.00E-4     | > 1.00E-4 |
| <b>Renal Cancer</b>               |           |                                       |       |       |       |       |       |      |      |      |      |                |           |               |           |
| 786-0                             | 0.745     | 2.584                                 | 2.343 | 2.365 | 2.368 | 0.770 | 0.674 | 87   | 88   | 88   | 1    | -10            | 2.76E-6   | 1.33E-5       | > 1.00E-4 |
| A498                              | 1.866     | 2.657                                 | 2.681 | 2.658 | 2.591 | 2.597 | 2.522 | 103  | 100  | 92   | 92   | 83             | > 1.00E-4 | > 1.00E-4     | > 1.00E-4 |
| ACHN                              | 0.559     | 2.248                                 | 2.203 | 2.185 | 2.159 | 1.045 | 0.933 | 97   | 96   | 95   | 29   | 22             | 4.76E-6   | > 1.00E-4     | > 1.00E-4 |
| CAKI-1                            | 0.733     | 2.937                                 | 2.798 | 2.808 | 2.835 | 1.990 | 1.674 | 94   | 94   | 95   | 57   | 43             | 3.09E-5   | > 1.00E-4     | > 1.00E-4 |
| RXF 393                           | 0.743     | 1.349                                 | 1.349 | 1.314 | 1.332 | 0.637 | 0.689 | 100  | 94   | 97   | -14  | -7             | 2.65E-6   | 7.45E-6       | > 1.00E-4 |
| SN12C                             | 0.731     | 2.400                                 | 2.389 | 2.387 | 2.344 | 1.049 | 1.006 | 99   | 99   | 97   | 19   | 16             | 3.99E-6   | > 1.00E-4     | > 1.00E-4 |
| TK-10                             | 1.146     | 2.160                                 | 2.042 | 2.010 | 2.084 | 1.840 | 1.717 | 88   | 85   | 92   | 68   | 56             | > 1.00E-4 | > 1.00E-4     | > 1.00E-4 |
| <b>Prostate Cancer</b>            |           |                                       |       |       |       |       |       |      |      |      |      |                |           |               |           |
| PC-3                              | 0.653     | 2.459                                 | 2.386 | 2.341 | 2.362 | 1.085 | 1.001 | 96   | 93   | 95   | 24   | 19             | 4.28E-6   | > 1.00E-4     | > 1.00E-4 |
| DU-145                            | 0.439     | 1.919                                 | 2.016 | 1.969 | 1.986 | 0.691 | 0.606 | 107  | 103  | 105  | 17   | 11             | 4.20E-6   | > 1.00E-4     | > 1.00E-4 |
| <b>Breast Cancer</b>              |           |                                       |       |       |       |       |       |      |      |      |      |                |           |               |           |
| MCF7                              | 0.391     | 2.018                                 | 1.925 | 1.900 | 1.910 | 0.630 | 0.550 | 94   | 93   | 93   | 15   | 10             | 3.56E-6   | > 1.00E-4     | > 1.00E-4 |
| HS 578T                           | 1.525     | 2.726                                 | 2.678 | 2.611 | 2.625 | 1.831 | 1.735 | 96   | 90   | 92   | 25   | 17             | 4.25E-6   | > 1.00E-4     | > 1.00E-4 |
| BT-549                            | 1.401     | 2.544                                 | 2.519 | 2.571 | 2.387 | 1.095 | 1.073 | 98   | 102  | 86   | -22  | -23            | 2.16E-6   | 6.28E-6       | > 1.00E-4 |
| T-47D                             | 1.345     | 2.875                                 | 2.689 | 2.664 | 2.605 | 2.341 | 2.239 | 88   | 86   | 82   | 65   | 58             | > 1.00E-4 | > 1.00E-4     | > 1.00E-4 |
| MDA-MB-468                        | 0.867     | 1.941                                 | 1.870 | 1.857 | 1.859 | 0.639 | 0.688 | 93   | 92   | 92   | -26  | -21            | 2.28E-6   | 6.00E-6       | > 1.00E-4 |

# Compound 5h

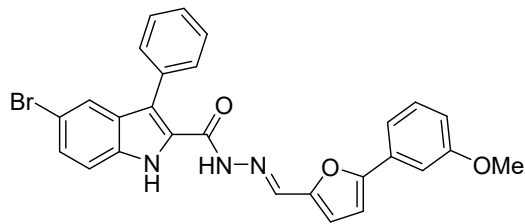

National Cancer Institute Developmental Therapeutics Program  
Dose Response Curves

NSC: D - 837022 / 1  
Report Date: August 09, 2022

SSPL: 1BCH | EXP. ID: 2206NS36  
Test Date: June 13, 2022

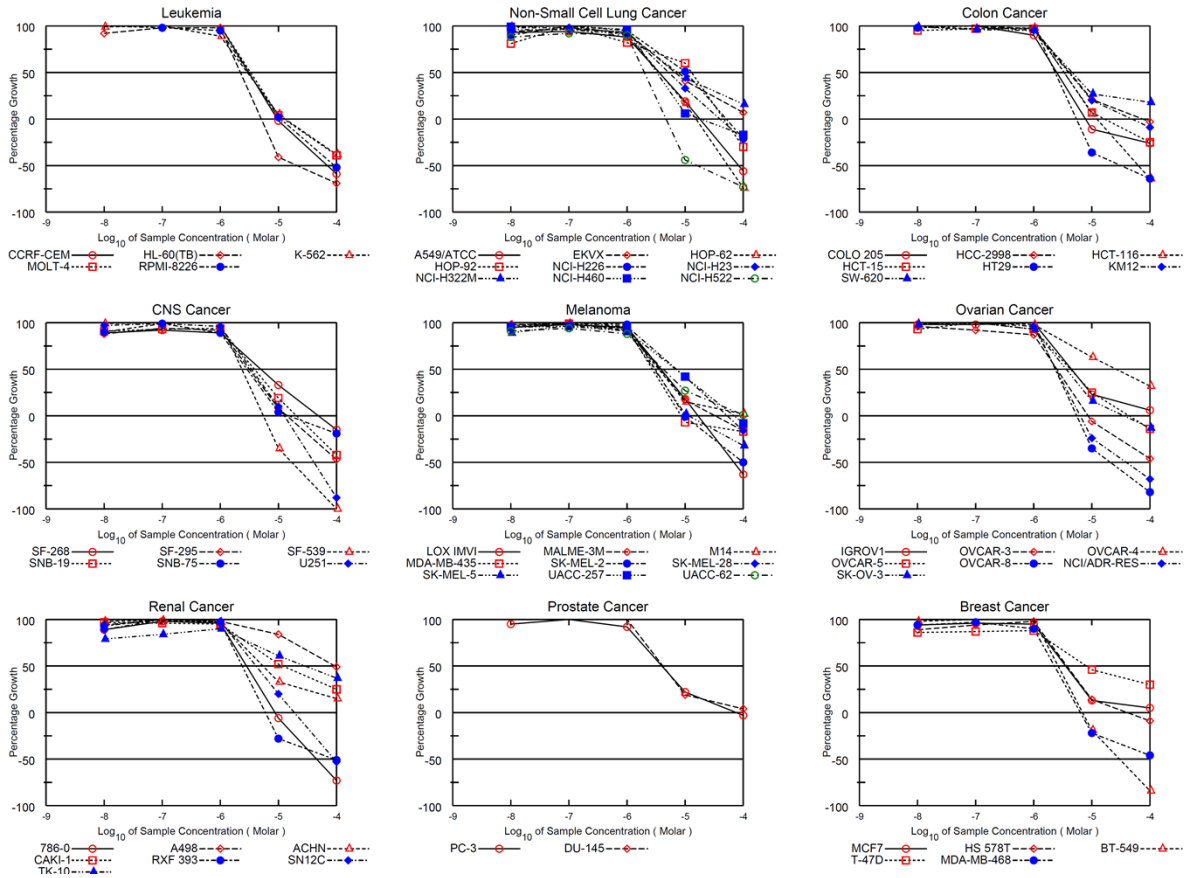

**National Cancer Institute Developmental Therapeutics Program  
In-Vitro Testing Results**

| NSC : D - 837022 / 1              |           | Experiment ID : 2206NS36              |       |       |       |       |       |      |      |      |      | Test Type : 08 |         | Units : Molar |           |  |
|-----------------------------------|-----------|---------------------------------------|-------|-------|-------|-------|-------|------|------|------|------|----------------|---------|---------------|-----------|--|
| Report Date : August 09, 2022     |           | Test Date : June 13, 2022             |       |       |       |       |       |      |      |      |      | QNS :          |         | MC :          |           |  |
| COMI : TO30                       |           | Stain Reagent : SRB Dual-Pass Related |       |       |       |       |       |      |      |      |      | SSPL : 1BCH    |         |               |           |  |
| Panel/Cell Line                   | Time Zero | Log10 Concentration                   |       |       |       |       |       |      |      |      |      | GI50           | TGI     | LC50          |           |  |
|                                   |           | Ctrl                                  | -8.0  | -7.0  | -6.0  | -5.0  | -4.0  | -8.0 | -7.0 | -6.0 | -5.0 |                |         |               | -4.0      |  |
| <b>Leukemia</b>                   |           |                                       |       |       |       |       |       |      |      |      |      |                |         |               |           |  |
| CCRF-CEM                          | 0.312     | 1.284                                 | 1.388 | 1.319 | 1.631 | 0.306 | 0.129 | 111  | 104  | 136  | -2   | -59            | 4.19E-6 | 9.66E-6       | 6.99E-5   |  |
| HL-60(TB)                         | 0.547     | 2.566                                 | 2.405 | 2.523 | 2.516 | 0.325 | 0.172 | 92   | 98   | 98   | -41  | -69            | 2.21E-6 | 5.08E-6       | 2.17E-5   |  |
| K-562                             | 0.189     | 1.791                                 | 1.769 | 1.842 | 1.610 | 0.263 | 0.118 | 99   | 103  | 89   | 5    | -38            | 2.89E-6 | 1.29E-5       | > 1.00E-4 |  |
| MOLT-4                            | 0.602     | 2.287                                 | 2.341 | 2.503 | 2.300 | 0.668 | 0.370 | 103  | 113  | 101  | 4    | -39            | 3.34E-6 | 1.23E-5       | > 1.00E-4 |  |
| RPMI-8226                         | 0.698     | 2.204                                 | 2.228 | 2.168 | 2.132 | 0.728 | 0.338 | 102  | 98   | 95   | 2    | -52            | 3.06E-6 | 1.09E-5       | 9.32E-5   |  |
| <b>Non-Small Cell Lung Cancer</b> |           |                                       |       |       |       |       |       |      |      |      |      |                |         |               |           |  |
| A549/ATCC                         | 0.528     | 2.431                                 | 2.304 | 2.324 | 2.212 | 0.882 | 0.230 | 93   | 94   | 88   | 19   | -56            | 3.55E-6 | 1.77E-5       | 8.21E-5   |  |
| EKVX                              | 0.666     | 2.096                                 | 2.007 | 2.057 | 2.001 | 1.251 | 0.764 | 94   | 97   | 93   | 41   | 7              | 6.70E-6 | > 1.00E-4     | > 1.00E-4 |  |
| HOP-62                            | 0.813     | 2.527                                 | 2.513 | 2.561 | 2.369 | 1.097 | 0.214 | 99   | 102  | 91   | 17   | -74            | 3.54E-6 | 1.53E-5       | 5.46E-5   |  |
| HOP-92                            | 0.979     | 1.654                                 | 1.528 | 1.654 | 1.531 | 1.381 | 0.683 | 81   | 100  | 82   | 60   | -30            | 1.26E-5 | 4.60E-5       | > 1.00E-4 |  |
| NCI-H226                          | 0.679     | 1.733                                 | 1.624 | 1.730 | 1.678 | 1.213 | 0.535 | 90   | 100  | 95   | 51   | -21            | 1.02E-5 | 5.06E-5       | > 1.00E-4 |  |
| NCI-H23                           | 0.517     | 1.608                                 | 1.588 | 1.586 | 1.535 | 0.878 | 0.406 | 98   | 98   | 93   | 33   | -22            | 5.23E-6 | 4.03E-5       | > 1.00E-4 |  |
| NCI-H322M                         | 0.710     | 1.994                                 | 1.941 | 1.946 | 1.879 | 1.277 | 0.922 | 96   | 96   | 91   | 44   | 16             | 7.50E-6 | > 1.00E-4     | > 1.00E-4 |  |
| NCI-H460                          | 0.286     | 2.758                                 | 2.725 | 2.773 | 2.668 | 0.434 | 0.236 | 99   | 101  | 96   | 6    | -17            | 3.26E-6 | 1.80E-5       | > 1.00E-4 |  |
| NCI-H522                          | 1.062     | 2.891                                 | 2.675 | 2.751 | 2.716 | 0.599 | 0.292 | 88   | 92   | 90   | -44  | -73            | 2.00E-6 | 4.73E-6       | 1.66E-5   |  |
| <b>Colon Cancer</b>               |           |                                       |       |       |       |       |       |      |      |      |      |                |         |               |           |  |
| COLO 205                          | 0.647     | 2.130                                 | 2.173 | 2.175 | 1.981 | 0.574 | 0.476 | 103  | 103  | 90   | -11  | -26            | 2.48E-6 | 7.74E-6       | > 1.00E-4 |  |
| HCC-2998                          | 0.726     | 2.392                                 | 2.402 | 2.399 | 2.337 | 1.080 | 0.702 | 101  | 100  | 97   | 21   | -3             | 4.16E-6 | 7.29E-5       | > 1.00E-4 |  |
| HCT-116                           | 0.298     | 2.892                                 | 2.657 | 2.621 | 2.640 | 0.449 | 0.107 | 99   | 97   | 98   | 6    | -64            | 3.33E-6 | 1.23E-5       | 6.25E-5   |  |
| HCT-15                            | 0.333     | 2.300                                 | 2.207 | 2.239 | 2.242 | 0.475 | 0.251 | 95   | 97   | 97   | 7    | -25            | 3.34E-6 | 1.69E-5       | > 1.00E-4 |  |
| HT29                              | 0.393     | 2.205                                 | 2.175 | 2.225 | 2.227 | 0.252 | 0.141 | 98   | 101  | 101  | -36  | -64            | 2.36E-6 | 5.47E-6       | 3.15E-5   |  |
| KM12                              | 0.609     | 2.975                                 | 3.095 | 2.976 | 2.860 | 1.075 | 0.557 | 105  | 100  | 95   | 20   | -9             | 3.97E-6 | 4.96E-5       | > 1.00E-4 |  |
| SW-620                            | 0.390     | 2.799                                 | 2.769 | 2.713 | 2.684 | 1.041 | 0.814 | 99   | 96   | 95   | 27   | 18             | 4.60E-6 | > 1.00E-4     | > 1.00E-4 |  |
| <b>CNS Cancer</b>                 |           |                                       |       |       |       |       |       |      |      |      |      |                |         |               |           |  |
| SF-268                            | 0.744     | 2.412                                 | 2.236 | 2.279 | 2.223 | 1.294 | 0.631 | 89   | 92   | 89   | 33   | -15            | 4.94E-6 | 4.83E-5       | > 1.00E-4 |  |
| SF-295                            | 0.622     | 2.278                                 | 2.072 | 2.186 | 2.141 | 0.759 | 0.327 | 88   | 94   | 92   | 8    | -47            | 3.16E-6 | 1.41E-5       | > 1.00E-4 |  |
| SF-539                            | 0.692     | 2.223                                 | 2.206 | 2.253 | 2.221 | 0.451 | 0.002 | 99   | 102  | 100  | -35  | -100           | 2.35E-6 | 5.51E-6       | 1.71E-5   |  |
| SNB-19                            | 0.533     | 1.856                                 | 1.734 | 1.761 | 1.781 | 0.778 | 0.309 | 91   | 93   | 94   | 19   | -42            | 3.84E-6 | 2.02E-5       | > 1.00E-4 |  |
| SNB-75                            | 2.142     | 3.125                                 | 3.028 | 3.116 | 3.013 | 2.183 | 1.733 | 90   | 99   | 89   | 4    | -19            | 2.87E-6 | 1.51E-5       | > 1.00E-4 |  |
| U251                              | 0.448     | 1.885                                 | 1.842 | 1.874 | 1.832 | 0.593 | 0.055 | 97   | 99   | 96   | 10   | -88            | 3.44E-6 | 1.27E-5       | 4.11E-5   |  |
| <b>Melanoma</b>                   |           |                                       |       |       |       |       |       |      |      |      |      |                |         |               |           |  |
| LOX IMVI                          | 0.365     | 1.979                                 | 1.903 | 1.948 | 1.901 | 0.652 | 0.135 | 95   | 98   | 95   | 18   | -63            | 3.84E-6 | 1.66E-5       | 6.88E-5   |  |
| MALME-3M                          | 0.664     | 1.599                                 | 1.580 | 1.584 | 1.542 | 0.823 | 0.557 | 98   | 98   | 94   | 17   | -16            | 3.72E-6 | 3.26E-5       | > 1.00E-4 |  |
| M14                               | 0.490     | 1.945                                 | 1.907 | 1.928 | 1.832 | 0.701 | 0.524 | 97   | 99   | 92   | 15   | 2              | 3.49E-6 | > 1.00E-4     | > 1.00E-4 |  |
| MDA-MB-435                        | 0.679     | 3.071                                 | 3.065 | 3.047 | 2.919 | 0.634 | 0.566 | 100  | 99   | 94   | -7   | -17            | 2.72E-6 | 8.57E-6       | > 1.00E-4 |  |
| SK-MEL-2                          | 1.159     | 2.034                                 | 1.989 | 2.077 | 2.014 | 1.147 | 0.580 | 95   | 105  | 98   | -1   | -50            | 3.04E-6 | 9.76E-6       | > 1.00E-4 |  |
| SK-MEL-28                         | 0.727     | 2.043                                 | 2.002 | 2.070 | 1.991 | 1.283 | 0.610 | 97   | 102  | 96   | 42   | -16            | 7.18E-6 | 5.29E-5       | > 1.00E-4 |  |
| SK-MEL-5                          | 0.821     | 3.032                                 | 2.783 | 2.972 | 2.863 | 0.862 | 0.560 | 89   | 97   | 92   | 2    | -32            | 2.94E-6 | 1.13E-5       | > 1.00E-4 |  |
| UACC-257                          | 1.131     | 2.410                                 | 2.352 | 2.360 | 2.298 | 1.668 | 1.041 | 95   | 96   | 91   | 42   | -8             | 6.86E-6 | 6.92E-5       | > 1.00E-4 |  |
| UACC-62                           | 0.900     | 2.610                                 | 2.448 | 2.509 | 2.401 | 1.359 | 0.911 | 91   | 94   | 88   | 27   | 1              | 4.17E-6 | > 1.00E-4     | > 1.00E-4 |  |
| <b>Ovarian Cancer</b>             |           |                                       |       |       |       |       |       |      |      |      |      |                |         |               |           |  |
| IGROV1                            | 0.765     | 2.454                                 | 2.427 | 2.418 | 2.496 | 1.158 | 0.865 | 98   | 98   | 102  | 23   | 6              | 4.59E-6 | > 1.00E-4     | > 1.00E-4 |  |
| OVCAR-3                           | 0.386     | 1.486                                 | 1.440 | 1.401 | 1.339 | 0.363 | 0.208 | 96   | 92   | 87   | -6   | -46            | 2.48E-6 | 8.60E-6       | > 1.00E-4 |  |
| OVCAR-4                           | 1.052     | 2.436                                 | 2.428 | 2.457 | 2.412 | 1.928 | 1.488 | 99   | 102  | 98   | 63   | 32             | 2.62E-5 | > 1.00E-4     | > 1.00E-4 |  |
| OVCAR-5                           | 0.769     | 1.713                                 | 1.651 | 1.727 | 1.645 | 1.009 | 0.665 | 93   | 102  | 93   | 25   | -14            | 4.31E-6 | 4.49E-5       | > 1.00E-4 |  |
| OVCAR-8                           | 0.427     | 1.792                                 | 1.833 | 1.894 | 1.815 | 0.279 | 0.077 | 103  | 107  | 102  | -35  | -82            | 2.39E-6 | 5.57E-6       | 2.11E-5   |  |
| NCI/ADR-RES                       | 0.388     | 1.321                                 | 1.346 | 1.347 | 1.282 | 0.293 | 0.124 | 103  | 103  | 96   | -24  | -68            | 2.40E-6 | 6.26E-6       | 3.85E-5   |  |
| SK-OV-3                           | 1.252     | 2.415                                 | 2.394 | 2.472 | 2.331 | 1.438 | 1.094 | 98   | 105  | 93   | 16   | -13            | 3.61E-6 | 3.62E-5       | > 1.00E-4 |  |
| <b>Renal Cancer</b>               |           |                                       |       |       |       |       |       |      |      |      |      |                |         |               |           |  |
| 786-0                             | 0.745     | 2.584                                 | 2.388 | 2.545 | 2.517 | 0.700 | 0.199 | 89   | 98   | 96   | -6   | -73            | 2.84E-6 | 8.73E-6       | 4.50E-5   |  |
| A498                              | 1.866     | 2.657                                 | 2.608 | 2.668 | 2.641 | 2.534 | 2.253 | 94   | 101  | 98   | 84   | 49             | 9.32E-5 | > 1.00E-4     | > 1.00E-4 |  |
| ACHN                              | 0.559     | 2.248                                 | 2.216 | 2.223 | 2.206 | 1.114 | 0.810 | 98   | 99   | 97   | 33   | 15             | 5.43E-6 | > 1.00E-4     | > 1.00E-4 |  |
| CAKI-1                            | 0.733     | 2.937                                 | 2.864 | 2.850 | 2.832 | 1.869 | 1.283 | 97   | 96   | 95   | 52   | 25             | 1.14E-5 | > 1.00E-4     | > 1.00E-4 |  |
| RXF 393                           | 0.743     | 1.349                                 | 1.306 | 1.368 | 1.331 | 0.532 | 0.363 | 93   | 103  | 97   | -28  | -51            | 2.37E-6 | 5.93E-6       | 8.85E-5   |  |
| SN12C                             | 0.731     | 2.400                                 | 2.223 | 2.441 | 2.361 | 1.069 | 0.342 | 89   | 102  | 98   | 20   | -53            | 4.13E-6 | 1.89E-5       | 9.02E-5   |  |
| TK-10                             | 1.146     | 2.160                                 | 1.948 | 2.001 | 2.060 | 1.769 | 1.520 | 79   | 84   | 90   | 61   | 37             | 2.91E-5 | > 1.00E-4     | > 1.00E-4 |  |
| <b>Prostate Cancer</b>            |           |                                       |       |       |       |       |       |      |      |      |      |                |         |               |           |  |
| PC-3                              | 0.653     | 2.459                                 | 2.377 | 2.486 | 2.306 | 1.051 | 0.633 | 95   | 101  | 92   | 22   | -3             | 3.96E-6 | 7.50E-5       | > 1.00E-4 |  |
| DU-145                            | 0.439     | 1.919                                 | 1.918 | 1.963 | 1.930 | 0.722 | 0.498 | 100  | 103  | 101  | 19   | 4              | 4.19E-6 | > 1.00E-4     | > 1.00E-4 |  |
| <b>Breast Cancer</b>              |           |                                       |       |       |       |       |       |      |      |      |      |                |         |               |           |  |
| MCF7                              | 0.391     | 2.018                                 | 1.928 | 1.959 | 1.929 | 0.596 | 0.465 | 94   | 96   | 95   | 13   | 5              | 3.50E-6 | > 1.00E-4     | > 1.00E-4 |  |
| HS 578T                           | 1.525     | 2.726                                 | 2.595 | 2.649 | 2.700 | 1.695 | 1.390 | 89   | 94   | 98   | 14   | -9             | 3.73E-6 | 4.11E-5       | > 1.00E-4 |  |
| BT-549                            | 1.401     | 2.544                                 | 2.521 | 2.639 | 2.611 | 1.137 | 0.218 | 98   | 108  | 106  | -19  | -84            | 2.80E-6 | 7.06E-6       | 2.98E-5   |  |
| T-47D                             | 1.345     | 2.875                                 | 2.654 | 2.681 | 2.690 | 2.046 | 1.802 | 86   | 87   | 88   | 46   | 30             | 7.94E-6 | > 1.00E-4     | > 1.00E-4 |  |
| MDA-MB-468                        | 0.867     | 1.941                                 | 1.877 | 1.910 | 1.838 | 0.677 | 0.473 | 94   | 97   | 90   | -22  | -46            | 2.29E-6 | 6.38E-6       | > 1.00E-4 |  |



# Compound 5i

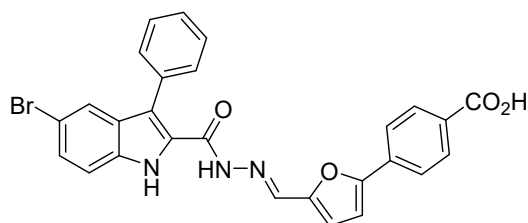

National Cancer Institute Developmental Therapeutics Program  
Dose Response Curves

NSC: D - 838297 / 1  
Report Date: December 19, 2022

SSPL: 1BCH | EXP. ID: 2209NS56  
Test Date: September 26, 2022

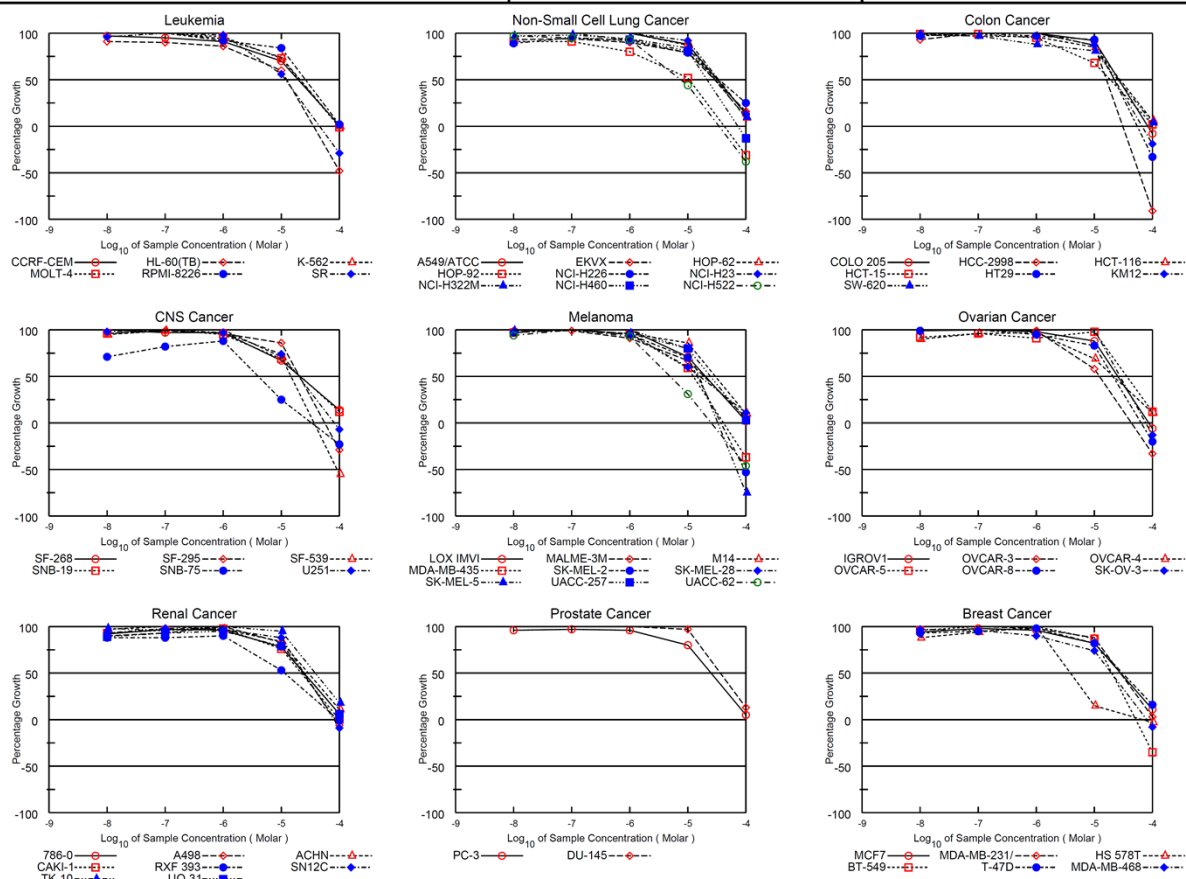

## National Cancer Institute Developmental Therapeutics Program In-Vitro Testing Results

|                                 |                                       |                |               |
|---------------------------------|---------------------------------------|----------------|---------------|
| NSC : D - 838297 / 1            | Experiment ID : 2209NS56              | Test Type : 08 | Units : Molar |
| Report Date : December 19, 2022 | Test Date : September 26, 2022        | QNS :          | MC :          |
| COMI : TO32                     | Stain Reagent : SRB Dual-Pass Related | SSPL : 1BCH    |               |

| Panel/Cell Line                   | Log10 Concentration |       |       |       |                        |       |       |                |      |      |      |      |         |           |           |
|-----------------------------------|---------------------|-------|-------|-------|------------------------|-------|-------|----------------|------|------|------|------|---------|-----------|-----------|
|                                   | Time Zero           | Ctrl  | -8.0  | -7.0  | Mean Optical Densities |       |       | Percent Growth |      |      |      |      | GI50    | TGI       | LC50      |
|                                   |                     |       |       |       | -6.0                   | -5.0  | -4.0  | -8.0           | -7.0 | -6.0 | -5.0 | -4.0 |         |           |           |
| <b>Leukemia</b>                   |                     |       |       |       |                        |       |       |                |      |      |      |      |         |           |           |
| CCRF-CEM                          | 0.400               | 2.031 | 1.990 | 1.957 | 1.890                  | 1.534 | 0.421 | 97             | 95   | 91   | 70   | 1    | 1.93E-5 | > 1.00E-4 | > 1.00E-4 |
| HL-60(TB)                         | 0.429               | 1.745 | 1.625 | 1.610 | 1.566                  | 1.221 | 0.225 | 91             | 90   | 86   | 60   | -48  | 1.24E-5 | 3.61E-5   | > 1.00E-4 |
| K-562                             | 0.188               | 1.621 | 1.642 | 1.656 | 1.542                  | 1.242 | 0.187 | 101            | 102  | 94   | 74   | 0    | 2.08E-5 | 9.84E-5   | > 1.00E-4 |
| MOLT-4                            | 0.400               | 1.713 | 1.753 | 1.737 | 1.655                  | 1.356 | 0.396 | 103            | 102  | 96   | 73   | -1   | 2.03E-5 | 9.66E-5   | > 1.00E-4 |
| RPMI-8226                         | 0.462               | 2.335 | 2.343 | 2.343 | 2.184                  | 2.037 | 0.494 | 100            | 100  | 92   | 84   | 2    | 2.59E-5 | > 1.00E-4 | > 1.00E-4 |
| SR                                | 0.207               | 0.584 | 0.567 | 0.591 | 0.578                  | 0.418 | 0.147 | 96             | 102  | 98   | 56   | -29  | 1.18E-5 | 4.56E-5   | > 1.00E-4 |
| <b>Non-Small Cell Lung Cancer</b> |                     |       |       |       |                        |       |       |                |      |      |      |      |         |           |           |
| A549/ATCC                         | 0.300               | 1.819 | 1.827 | 2.008 | 1.826                  | 1.637 | 0.505 | 101            | 112  | 100  | 88   | 13   | 3.23E-5 | > 1.00E-4 | > 1.00E-4 |
| EKVX                              | 0.620               | 2.122 | 2.013 | 2.029 | 1.976                  | 1.801 | 0.867 | 93             | 94   | 90   | 79   | 16   | 2.88E-5 | > 1.00E-4 | > 1.00E-4 |
| HOP-62                            | 0.629               | 2.036 | 2.133 | 2.279 | 2.271                  | 1.849 | 0.750 | 107            | 117  | 117  | 87   | 9    | 2.95E-5 | > 1.00E-4 | > 1.00E-4 |
| HOP-92                            | 1.277               | 1.787 | 1.740 | 1.744 | 1.684                  | 1.542 | 0.879 | 91             | 91   | 80   | 52   | -31  | 1.06E-5 | 4.22E-5   | > 1.00E-4 |
| NCI-H226                          | 0.708               | 1.875 | 1.751 | 1.812 | 1.781                  | 1.632 | 1.000 | 89             | 95   | 92   | 79   | 25   | 3.45E-5 | > 1.00E-4 | > 1.00E-4 |
| NCI-H23                           | 0.490               | 1.635 | 1.662 | 1.697 | 1.645                  | 1.545 | 0.639 | 102            | 105  | 101  | 92   | 13   | 3.41E-5 | > 1.00E-4 | > 1.00E-4 |
| NCI-H322M                         | 0.801               | 2.137 | 2.103 | 2.117 | 2.054                  | 1.917 | 0.938 | 97             | 98   | 94   | 84   | 10   | 2.87E-5 | > 1.00E-4 | > 1.00E-4 |
| NCI-H460                          | 0.224               | 2.053 | 2.046 | 2.067 | 1.933                  | 1.702 | 0.195 | 100            | 101  | 93   | 81   | -13  | 2.13E-5 | 7.28E-5   | > 1.00E-4 |
| NCI-H522                          | 0.898               | 2.711 | 2.656 | 2.617 | 2.588                  | 1.701 | 0.555 | 97             | 95   | 93   | 44   | -38  | 7.64E-6 | 3.44E-5   | > 1.00E-4 |
| <b>Colon Cancer</b>               |                     |       |       |       |                        |       |       |                |      |      |      |      |         |           |           |
| COLO 205                          | 0.562               | 2.096 | 2.163 | 2.200 | 2.090                  | 1.973 | 0.519 | 104            | 107  | 100  | 92   | -8   | 2.64E-5 | 8.38E-5   | > 1.00E-4 |
| HCC-2998                          | 1.039               | 3.116 | 2.968 | 3.114 | 3.161                  | 2.843 | 0.090 | 93             | 100  | 102  | 87   | -91  | 1.61E-5 | 3.07E-5   | 5.86E-5   |
| HCT-116                           | 0.260               | 2.522 | 2.486 | 2.452 | 2.443                  | 2.187 | 0.389 | 98             | 97   | 96   | 85   | 6    | 2.77E-5 | > 1.00E-4 | > 1.00E-4 |
| HCT-15                            | 0.372               | 2.487 | 2.465 | 2.468 | 2.372                  | 1.806 | 0.412 | 99             | 99   | 95   | 68   | 2    | 1.86E-5 | > 1.00E-4 | > 1.00E-4 |
| HT29                              | 0.484               | 2.848 | 2.776 | 2.878 | 2.783                  | 2.676 | 0.325 | 97             | 101  | 97   | 93   | -33  | 2.19E-5 | 5.47E-5   | > 1.00E-4 |
| KM12                              | 0.473               | 2.256 | 2.241 | 2.319 | 2.266                  | 2.028 | 0.383 | 99             | 104  | 101  | 87   | -19  | 2.24E-5 | 6.62E-5   | > 1.00E-4 |
| SW-620                            | 0.330               | 2.130 | 2.088 | 2.079 | 1.916                  | 1.788 | 0.410 | 98             | 97   | 88   | 81   | 4    | 2.54E-5 | > 1.00E-4 | > 1.00E-4 |
| <b>CNS Cancer</b>                 |                     |       |       |       |                        |       |       |                |      |      |      |      |         |           |           |
| SF-268                            | 0.665               | 2.205 | 2.205 | 2.164 | 2.154                  | 1.694 | 0.877 | 100            | 97   | 97   | 67   | 14   | 2.08E-5 | > 1.00E-4 | > 1.00E-4 |
| SF-295                            | 0.856               | 2.871 | 2.784 | 2.859 | 2.781                  | 2.581 | 0.607 | 96             | 99   | 96   | 86   | -29  | 2.04E-5 | 5.58E-5   | > 1.00E-4 |
| SF-539                            | 0.766               | 2.260 | 2.181 | 2.240 | 2.285                  | 1.831 | 0.345 | 95             | 99   | 102  | 71   | -55  | 1.47E-5 | 3.67E-5   | 9.12E-5   |
| SNB-19                            | 0.521               | 1.853 | 1.794 | 1.867 | 1.781                  | 1.439 | 0.684 | 96             | 101  | 95   | 69   | 12   | 2.16E-5 | > 1.00E-4 | > 1.00E-4 |
| SNB-75                            | 1.299               | 2.245 | 1.968 | 2.075 | 2.127                  | 1.540 | 0.998 | 71             | 82   | 88   | 25   | -23  | 4.02E-6 | 3.33E-5   | > 1.00E-4 |
| U251                              | 0.284               | 1.437 | 1.414 | 1.457 | 1.403                  | 1.142 | 0.266 | 98             | 102  | 97   | 74   | -7   | 2.00E-5 | 8.31E-5   | > 1.00E-4 |
| <b>Melanoma</b>                   |                     |       |       |       |                        |       |       |                |      |      |      |      |         |           |           |
| LOX IMVI                          | 0.198               | 1.266 | 1.288 | 1.313 | 1.261                  | 0.954 | 0.221 | 102            | 104  | 100  | 71   | 2    | 2.00E-5 | > 1.00E-4 | > 1.00E-4 |
| MALME-3M                          | 0.681               | 1.368 | 1.358 | 1.358 | 1.306                  | 1.142 | 0.725 | 99             | 99   | 91   | 67   | 6    | 1.91E-5 | > 1.00E-4 | > 1.00E-4 |
| M14                               | 0.451               | 1.866 | 1.863 | 1.868 | 1.812                  | 1.671 | 0.590 | 100            | 100  | 96   | 86   | 10   | 2.98E-5 | > 1.00E-4 | > 1.00E-4 |
| MDA-MB-435                        | 0.595               | 2.549 | 2.496 | 2.556 | 2.460                  | 1.753 | 0.373 | 97             | 100  | 95   | 59   | -37  | 1.25E-5 | 4.11E-5   | > 1.00E-4 |
| SK-MEL-2                          | 1.479               | 2.966 | 2.921 | 2.961 | 2.884                  | 2.523 | 0.703 | 97             | 100  | 95   | 70   | -53  | 1.46E-5 | 3.73E-5   | 9.54E-5   |
| SK-MEL-28                         | 0.488               | 1.387 | 1.409 | 1.462 | 1.352                  | 1.024 | 0.590 | 102            | 108  | 96   | 60   | 11   | 1.68E-5 | > 1.00E-4 | > 1.00E-4 |
| SK-MEL-5                          | 0.911               | 3.361 | 3.333 | 3.356 | 3.254                  | 2.879 | 0.232 | 99             | 100  | 96   | 80   | -75  | 1.57E-5 | 3.30E-5   | 6.94E-5   |
| UACC-257                          | 1.111               | 2.543 | 2.560 | 2.747 | 2.604                  | 2.255 | 1.155 | 101            | 114  | 104  | 80   | 3    | 2.45E-5 | > 1.00E-4 | > 1.00E-4 |
| UACC-62                           | 0.783               | 2.562 | 2.461 | 2.586 | 2.442                  | 1.338 | 0.419 | 94             | 101  | 93   | 31   | -46  | 4.98E-6 | 2.52E-5   | > 1.00E-4 |
| <b>Ovarian Cancer</b>             |                     |       |       |       |                        |       |       |                |      |      |      |      |         |           |           |
| IGROV1                            | 0.835               | 2.528 | 2.507 | 2.589 | 2.500                  | 2.323 | 0.784 | 99             | 104  | 98   | 88   | -6   | 2.53E-5 | 8.61E-5   | > 1.00E-4 |
| OVCAR-3                           | 0.555               | 1.786 | 1.796 | 1.814 | 1.771                  | 1.268 | 0.370 | 101            | 102  | 99   | 58   | -33  | 1.22E-5 | 4.31E-5   | > 1.00E-4 |
| OVCAR-4                           | 1.008               | 2.188 | 2.073 | 2.140 | 2.150                  | 1.818 | 1.141 | 90             | 96   | 97   | 69   | 11   | 2.11E-5 | > 1.00E-4 | > 1.00E-4 |
| OVCAR-5                           | 0.709               | 1.565 | 1.500 | 1.531 | 1.484                  | 1.550 | 0.816 | 92             | 96   | 91   | 98   | 12   | 3.65E-5 | > 1.00E-4 | > 1.00E-4 |
| OVCAR-8                           | 0.464               | 2.214 | 2.197 | 2.311 | 2.135                  | 1.909 | 0.370 | 99             | 106  | 95   | 83   | -20  | 2.07E-5 | 6.34E-5   | > 1.00E-4 |
| SK-OV-3                           | 0.994               | 2.153 | 2.310 | 2.497 | 2.602                  | 2.181 | 0.862 | 114            | 130  | 139  | 102  | -13  | 2.83E-5 | 7.67E-5   | > 1.00E-4 |
| <b>Renal Cancer</b>               |                     |       |       |       |                        |       |       |                |      |      |      |      |         |           |           |
| 786-0                             | 0.583               | 2.510 | 2.347 | 2.450 | 2.426                  | 2.081 | 0.692 | 92             | 97   | 96   | 78   | 6    | 2.42E-5 | > 1.00E-4 | > 1.00E-4 |
| A498                              | 1.209               | 1.827 | 1.766 | 1.782 | 1.835                  | 1.724 | 1.137 | 90             | 93   | 101  | 83   | -6   | 2.36E-5 | 8.57E-5   | > 1.00E-4 |
| ACHN                              | 0.375               | 1.653 | 1.609 | 1.712 | 1.611                  | 1.453 | 0.513 | 97             | 105  | 97   | 84   | 11   | 2.93E-5 | > 1.00E-4 | > 1.00E-4 |
| CAKI-1                            | 0.550               | 2.140 | 2.030 | 2.081 | 2.110                  | 1.764 | 0.548 | 93             | 96   | 98   | 76   | 0    | 2.20E-5 | 9.86E-5   | > 1.00E-4 |
| RXF 393                           | 0.898               | 1.904 | 1.788 | 1.788 | 1.799                  | 1.430 | 0.888 | 88             | 88   | 90   | 53   | -1   | 1.13E-5 | 9.51E-5   | > 1.00E-4 |
| SN12C                             | 1.086               | 3.183 | 3.026 | 3.148 | 3.127                  | 2.939 | 0.988 | 93             | 98   | 97   | 88   | -9   | 2.48E-5 | 8.08E-5   | > 1.00E-4 |
| TK-10                             | 1.345               | 2.988 | 2.957 | 2.930 | 2.987                  | 2.914 | 1.642 | 98             | 96   | 100  | 95   | 18   | 3.87E-5 | > 1.00E-4 | > 1.00E-4 |
| UO-31                             | 0.743               | 2.252 | 2.082 | 2.153 | 2.171                  | 1.940 | 0.827 | 89             | 93   | 95   | 79   | 6    | 2.50E-5 | > 1.00E-4 | > 1.00E-4 |
| <b>Prostate Cancer</b>            |                     |       |       |       |                        |       |       |                |      |      |      |      |         |           |           |
| PC-3                              | 0.557               | 2.298 | 2.233 | 2.253 | 2.220                  | 1.954 | 0.638 | 96             | 97   | 96   | 80   | 5    | 2.51E-5 | > 1.00E-4 | > 1.00E-4 |
| DU-145                            | 0.455               | 1.918 | 2.036 | 2.036 | 1.979                  | 1.871 | 0.652 | 108            | 108  | 104  | 97   | 13   | 3.64E-5 | > 1.00E-4 | > 1.00E-4 |
| <b>Breast Cancer</b>              |                     |       |       |       |                        |       |       |                |      |      |      |      |         |           |           |
| MCF7                              | 0.401               | 2.241 | 2.140 | 2.206 | 2.171                  | 1.907 | 0.612 | 94             | 98   | 96   | 82   | 11   | 2.83E-5 | > 1.00E-4 | > 1.00E-4 |
| MDA-MB-231/ATCC                   | 0.528               | 1.238 | 1.244 | 1.261 | 1.225                  | 1.153 | 0.548 | 101            | 103  | 98   | 88   | 3    | 2.79E-5 | > 1.00E-4 | > 1.00E-4 |
| HS 578T                           | 1.518               | 2.554 | 2.430 | 2.490 | 2.550                  | 1.676 | 1.480 | 88             | 94   | 100  | 15   | -3   | 3.87E-6 | 7.20E-5   | > 1.00E-4 |
| BT-549                            | 1.169               | 2.171 | 2.128 | 2.210 | 2.188                  | 2.040 | 0.760 | 96             | 104  | 102  | 87   | -35  | 2.01E-5 | 5.17E-5   | > 1.00E-4 |
| T-47D                             | 1.830               | 3.261 | 3.166 | 3.187 | 3.240                  | 3.010 | 2.062 | 93             | 95   | 98   | 82   | 16   | 3.09E-5 | > 1.00E-4 | > 1.00E-4 |
| MDA-MB-468                        | 0.688               | 1.745 | 1.713 | 1.698 | 1.635                  | 1.468 | 0.632 | 97             | 96   | 90   | 74   | -8   | 1.95E-5 | 7.96E-5   | > 1.00E-4 |

# Compound 5k

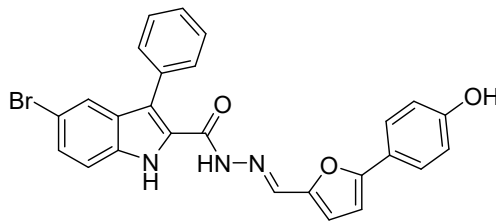

National Cancer Institute Developmental Therapeutics Program  
Dose Response Curves

NSC: D - 838304 / 1  
Report Date: December 19, 2022

SSPL: 1BCH  
EXP. ID: 2209NS52  
Test Date: September 19, 2022

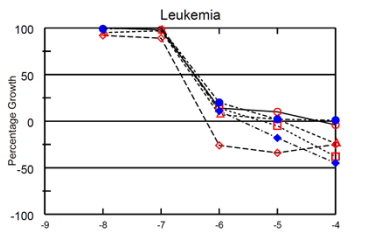

CCRFL-CEM  
MOLT-4  
HL-60(TB)  
RPMI-8226  
K-562  
SR

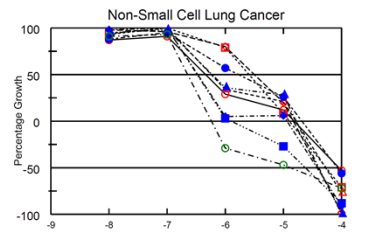

A549/ATCC  
HOP-92  
NCI-H322M  
EKVX  
NCI-H426  
NCI-H460  
HOP-62  
NCI-H23  
NCI-H522

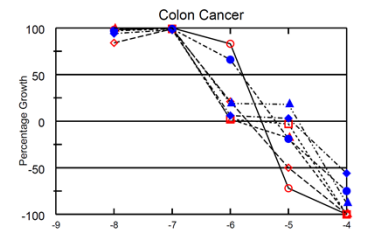

COLO 205  
HCT-15  
SW-620  
HCC-2998  
HT29  
HCT-116  
KM12

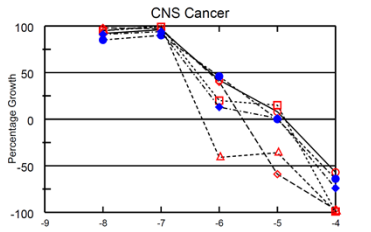

SF-268  
SNB-19  
SF-295  
SNB-75  
SF-539  
U251

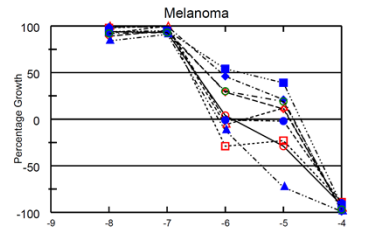

LOX IMVI  
MDA-MB-435  
SK-MEL-5  
MALME-3M  
SK-MEL-2  
UACC-257  
M14  
SK-MEL-28  
UACC-62

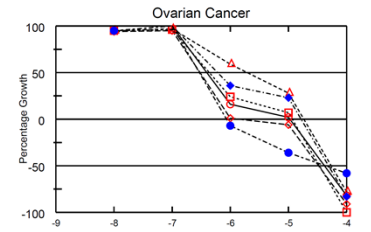

IGROV1  
OVCA-5  
OVCA-3  
OVCA-8  
OVCA-4  
SK-OV-3

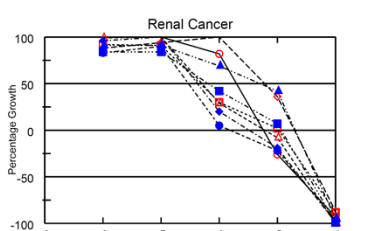

786-0  
CAKI-1  
A498  
RXF 393  
ACHN  
SN12C

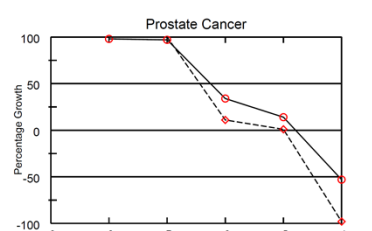

PC-3  
DU-145

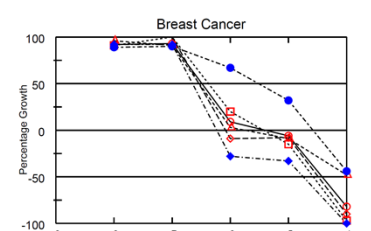

MCF7  
BT-549  
MDA-MB-231/  
T-47D  
HS 578T  
MDA-MB-468

**National Cancer Institute Developmental Therapeutics Program  
In-Vitro Testing Results**

|                                 |                                       |                |               |
|---------------------------------|---------------------------------------|----------------|---------------|
| NSC : D - 838304 / 1            | Experiment ID : 2209NS52              | Test Type : 08 | Units : Molar |
| Report Date : December 19, 2022 | Test Date : September 19, 2022        | QNS :          | MC :          |
| COMI : TO39                     | Stain Reagent : SRB Dual-Pass Related | SSPL : 1BCH    |               |

| Panel/Cell Line                   | Time Zero | Log10 Concentration |       |       |                        |       |        |                |      |      |      | GI50 | TGI     | LC50      |           |
|-----------------------------------|-----------|---------------------|-------|-------|------------------------|-------|--------|----------------|------|------|------|------|---------|-----------|-----------|
|                                   |           | Ctrl                | -8.0  | -7.0  | Mean Optical Densities |       |        | Percent Growth |      |      |      |      |         |           |           |
|                                   |           |                     |       | -6.0  | -5.0                   | -4.0  | -8.0   | -7.0           | -6.0 | -5.0 | -4.0 |      |         |           |           |
| <b>Leukemia</b>                   |           |                     |       |       |                        |       |        |                |      |      |      |      |         |           |           |
| CCRF-CEM                          | 0.482     | 2.216               | 2.258 | 2.187 | 0.728                  | 0.664 | 0.465  | 102            | 98   | 14   | 10   | -4   | 3.75E-7 | 5.60E-5   | > 1.00E-4 |
| HL-60(TB)                         | 0.593     | 2.036               | 1.916 | 1.879 | 0.438                  | 0.389 | 0.446  | 92             | 89   | -26  | -34  | -25  | 2.18E-7 | 5.93E-7   | > 1.00E-4 |
| K-562                             | 0.227     | 2.093               | 2.006 | 2.034 | 0.360                  | 0.268 | 0.173  | 95             | 97   | 7    | 2    | -24  | 3.33E-7 | 1.21E-5   | > 1.00E-4 |
| MOLT-4                            | 0.570     | 2.163               | 2.170 | 2.225 | 0.794                  | 0.541 | 0.355  | 100            | 104  | 14   | -5   | -38  | 3.98E-7 | 5.38E-6   | > 1.00E-4 |
| RPMI-8226                         | 0.778     | 2.819               | 2.803 | 2.895 | 1.178                  | 0.814 | 0.794  | 99             | 104  | 20   | 2    | 1    | 4.35E-7 | > 1.00E-4 | > 1.00E-4 |
| SR                                | 0.428     | 2.103               | 2.117 | 2.118 | 0.608                  | 0.350 | 0.237  | 101            | 101  | 11   | -18  | -45  | 3.67E-7 | 2.35E-6   | > 1.00E-4 |
| <b>Non-Small Cell Lung Cancer</b> |           |                     |       |       |                        |       |        |                |      |      |      |      |         |           |           |
| A549/ATCC                         | 0.360     | 2.484               | 2.206 | 2.303 | 0.974                  | 0.605 | 0.170  | 87             | 91   | 29   | 12   | -53  | 4.60E-7 | 1.51E-5   | 9.01E-5   |
| EKVX                              | 0.599     | 1.788               | 1.768 | 1.741 | 1.546                  | 0.838 | 0.014  | 98             | 96   | 80   | 20   | -98  | 3.15E-6 | 1.48E-5   | 3.94E-5   |
| HOP-62                            | 0.661     | 2.510               | 2.406 | 2.518 | 1.292                  | 1.049 | 0.151  | 94             | 100  | 34   | 21   | -77  | 5.77E-7 | 1.64E-5   | 5.29E-5   |
| HOP-92                            | 1.343     | 1.836               | 1.802 | 1.897 | 1.735                  | 1.385 | 0.394  | 93             | 112  | 79   | 8    | -71  | 2.60E-6 | 1.28E-5   | 5.47E-5   |
| NCI-H226                          | 0.921     | 1.863               | 1.754 | 1.815 | 1.456                  | 1.167 | 0.405  | 88             | 95   | 57   | 26   | -56  | 1.66E-6 | 2.08E-5   | 8.43E-5   |
| NCI-H23                           | 0.586     | 1.736               | 1.718 | 1.738 | 0.647                  | 0.660 | 0.056  | 98             | 100  | 5    | 6    | -91  | 3.38E-7 | 1.17E-5   | 3.82E-5   |
| NCI-H322M                         | 0.694     | 1.940               | 1.882 | 1.915 | 1.143                  | 1.040 | -0.004 | 95             | 98   | 36   | 28   | -100 | 5.94E-7 | 1.65E-5   | 4.06E-5   |
| NCI-H460                          | 0.245     | 2.707               | 2.789 | 2.796 | 0.322                  | 0.178 | 0.030  | 103            | 104  | 3    | -27  | -88  | 3.42E-7 | 1.27E-6   | 2.36E-5   |
| NCI-H522                          | 0.878     | 2.779               | 2.607 | 2.642 | 0.624                  | 0.463 | 0.247  | 91             | 93   | -29  | -47  | -72  | 2.25E-7 | 5.78E-7   | 1.29E-5   |
| <b>Colon Cancer</b>               |           |                     |       |       |                        |       |        |                |      |      |      |      |         |           |           |
| COLO 205                          | 0.361     | 1.677               | 1.652 | 1.703 | 1.455                  | 0.101 | -0.012 | 98             | 102  | 83   | -72  | -100 | 1.63E-6 | 3.43E-6   | 7.21E-6   |
| HCC-2998                          | 0.725     | 2.611               | 2.303 | 2.589 | 1.130                  | 0.363 | 0.001  | 84             | 99   | 21   | -50  | -100 | 4.28E-7 | 2.00E-6   | 1.00E-5   |
| HCT-116                           | 0.310     | 2.869               | 2.852 | 2.895 | 0.355                  | 0.254 | -0.002 | 99             | 101  | 2    | -18  | -100 | 3.26E-7 | 1.22E-6   | 2.45E-5   |
| HCT-15                            | 0.403     | 2.394               | 2.412 | 2.369 | 0.438                  | 0.393 | -0.002 | 101            | 99   | 2    | -3   | -100 | 3.18E-7 | 2.53E-6   | 3.07E-5   |
| HT29                              | 0.322     | 2.413               | 2.340 | 2.391 | 1.695                  | 0.261 | 0.081  | 97             | 99   | 66   | -19  | -75  | 1.53E-6 | 5.95E-6   | 3.58E-5   |
| KM12                              | 0.460     | 2.313               | 2.209 | 2.280 | 0.564                  | 0.519 | 0.204  | 94             | 98   | 6    | 3    | -56  | 3.32E-7 | 1.13E-5   | 8.01E-5   |
| SW-620                            | 0.252     | 2.228               | 2.272 | 2.256 | 0.631                  | 0.611 | 0.031  | 102            | 101  | 19   | 18   | -88  | 4.22E-7 | 1.48E-5   | 4.39E-5   |
| <b>CNS Cancer</b>                 |           |                     |       |       |                        |       |        |                |      |      |      |      |         |           |           |
| SF-268                            | 0.976     | 2.746               | 2.606 | 2.677 | 1.725                  | 1.124 | 0.423  | 92             | 96   | 42   | 8    | -57  | 7.19E-7 | 1.34E-5   | 7.90E-5   |
| SF-295                            | 0.762     | 2.406               | 2.366 | 2.359 | 1.416                  | 0.312 | 0.025  | 98             | 97   | 40   | -59  | -97  | 6.63E-7 | 2.52E-6   | 8.09E-6   |
| SF-539                            | 0.981     | 2.607               | 2.519 | 2.615 | 0.581                  | 0.632 | 0.007  | 95             | 100  | -41  | -36  | -99  | 2.28E-7 | 5.14E-7   | 1.68E-5   |
| SNB-19                            | 0.760     | 2.232               | 2.153 | 2.214 | 1.061                  | 0.987 | 0.009  | 95             | 99   | 20   | 15   | -99  | 4.19E-7 | 1.36E-5   | 3.74E-5   |
| SNB-75                            | 1.280     | 2.168               | 2.032 | 2.077 | 1.689                  | 1.277 | 0.466  | 85             | 90   | 46   | 0    | -64  | 8.13E-7 | 9.88E-6   | 6.09E-5   |
| U251                              | 0.321     | 1.865               | 1.722 | 1.778 | 0.527                  | 0.332 | 0.083  | 91             | 94   | 13   | 1    | -74  | 3.53E-7 | 1.02E-5   | 4.74E-5   |
| <b>Melanoma</b>                   |           |                     |       |       |                        |       |        |                |      |      |      |      |         |           |           |
| LOX IMVI                          | 0.420     | 2.355               | 2.243 | 2.216 | 0.490                  | 0.297 | 0.035  | 94             | 93   | 4    | -29  | -92  | 3.02E-7 | 1.28E-6   | 2.14E-5   |
| MALME-3M                          | 0.720     | 1.500               | 1.418 | 1.459 | 0.944                  | 0.807 | 0.026  | 89             | 95   | 29   | 11   | -96  | 4.75E-7 | 1.27E-5   | 3.70E-5   |
| M14                               | 0.451     | 1.785               | 1.778 | 1.774 | 0.422                  | 0.612 | 0.017  | 99             | 99   | -6   | 12   | -96  | 2.92E-7 | .         | 3.74E-5   |
| MDA-MB-435                        | 0.514     | 2.330               | 2.285 | 2.350 | 0.367                  | 0.395 | 0.058  | 98             | 101  | -29  | -23  | -89  | 2.48E-7 | 6.02E-7   | 2.56E-5   |
| SK-MEL-2                          | 1.139     | 2.569               | 2.457 | 2.574 | 1.127                  | 1.118 | 0.114  | 92             | 100  | -1   | -2   | -90  | 3.13E-7 | 9.75E-7   | 3.52E-5   |
| SK-MEL-28                         | 0.644     | 1.854               | 1.840 | 1.866 | 1.197                  | 0.904 | 0.010  | 99             | 101  | 46   | 21   | -99  | 8.36E-7 | 1.51E-5   | 3.94E-5   |
| SK-MEL-5                          | 0.853     | 2.969               | 2.632 | 2.768 | 0.749                  | 0.227 | 0.013  | 84             | 91   | -12  | -73  | -99  | 2.48E-7 | 7.60E-7   | 4.14E-6   |
| UACC-257                          | 0.935     | 2.570               | 2.464 | 2.493 | 1.816                  | 1.574 | 0.079  | 94             | 95   | 54   | 39   | -92  | 1.83E-6 | 1.99E-5   | 4.80E-5   |
| UACC-62                           | 0.971     | 2.818               | 2.673 | 2.695 | 1.533                  | 1.318 | 0.026  | 92             | 93   | 30   | 19   | -97  | 4.89E-7 | 1.45E-5   | 3.91E-5   |
| <b>Ovarian Cancer</b>             |           |                     |       |       |                        |       |        |                |      |      |      |      |         |           |           |
| IGROV1                            | 0.756     | 2.558               | 2.615 | 2.580 | 1.050                  | 0.795 | 0.136  | 103            | 101  | 16   | 2    | -82  | 4.01E-7 | 1.06E-5   | 4.16E-5   |
| OVCAR-3                           | 0.390     | 1.519               | 1.452 | 1.459 | 0.399                  | 0.369 | 0.037  | 94             | 95   | 1    | -6   | -91  | 2.99E-7 | 1.34E-6   | 3.34E-5   |
| OVCAR-4                           | 1.095     | 2.367               | 2.306 | 2.325 | 1.844                  | 1.446 | 0.244  | 95             | 97   | 59   | 28   | -78  | 1.92E-6 | 1.83E-5   | 5.45E-5   |
| OVCAR-5                           | 0.558     | 1.372               | 1.331 | 1.336 | 0.751                  | 0.619 | -0.007 | 95             | 96   | 24   | 7    | -100 | 4.31E-7 | 1.17E-5   | 3.42E-5   |
| OVCAR-8                           | 0.462     | 2.447               | 2.353 | 2.439 | 0.431                  | 0.296 | 0.193  | 95             | 100  | -7   | -36  | -58  | 2.93E-7 | 8.65E-7   | 4.28E-5   |
| SK-OV-3                           | 0.783     | 2.098               | 2.115 | 2.139 | 1.251                  | 1.081 | 0.133  | 101            | 103  | 36   | 23   | -83  | 6.12E-7 | 1.64E-5   | 4.87E-5   |
| <b>Renal Cancer</b>               |           |                     |       |       |                        |       |        |                |      |      |      |      |         |           |           |
| 786-0                             | 0.895     | 2.834               | 2.831 | 2.853 | 2.489                  | 0.666 | 0.067  | 100            | 101  | 82   | -26  | -93  | 1.99E-6 | 5.78E-6   | 2.31E-5   |
| A498                              | 1.295     | 2.029               | 1.942 | 1.986 | 2.051                  | 1.563 | 0.168  | 88             | 94   | 103  | 36   | -87  | 6.26E-6 | 1.97E-5   | 5.01E-5   |
| ACHN                              | 0.707     | 2.654               | 2.644 | 2.689 | 1.271                  | 0.654 | -0.014 | 99             | 102  | 29   | -8   | -100 | 5.14E-7 | 6.21E-6   | 2.88E-5   |
| CAKI-1                            | 0.596     | 2.178               | 2.046 | 2.038 | 1.069                  | 0.624 | 0.072  | 92             | 91   | 30   | 2    | -88  | 4.69E-7 | 1.05E-5   | 3.77E-5   |
| RXF 393                           | 1.184     | 1.835               | 1.728 | 1.771 | 1.216                  | 0.928 | 0.041  | 83             | 90   | 5    | -22  | -97  | 2.96E-7 | 1.52E-6   | 2.39E-5   |
| SN12C                             | 1.270     | 3.291               | 3.219 | 3.284 | 1.670                  | 1.032 | 0.009  | 96             | 100  | 20   | -19  | -99  | 4.18E-7 | 3.26E-6   | 2.44E-5   |
| TK-10                             | 0.988     | 2.746               | 2.589 | 2.583 | 2.208                  | 1.727 | 0.053  | 91             | 91   | 69   | 42   | -95  | 5.10E-6 | 2.03E-5   | 4.71E-5   |
| UO-31                             | 0.786     | 2.406               | 2.154 | 2.153 | 1.470                  | 0.898 | 0.005  | 84             | 84   | 42   | 7    | -99  | 6.53E-7 | 1.16E-5   | 3.43E-5   |
| <b>Prostate Cancer</b>            |           |                     |       |       |                        |       |        |                |      |      |      |      |         |           |           |
| PC-3                              | 0.720     | 2.499               | 2.466 | 2.446 | 1.327                  | 0.974 | 0.340  | 98             | 97   | 34   | 14   | -53  | 5.59E-7 | 1.63E-5   | 9.07E-5   |
| DU-145                            | 0.503     | 2.101               | 2.155 | 2.217 | 0.678                  | 0.515 | 0.008  | 103            | 107  | 11   | 1    | -98  | 3.93E-7 | 1.02E-5   | 3.25E-5   |
| <b>Breast Cancer</b>              |           |                     |       |       |                        |       |        |                |      |      |      |      |         |           |           |
| MCF7                              | 0.508     | 2.253               | 2.119 | 2.133 | 0.672                  | 0.479 | 0.093  | 92             | 93   | 9    | -6   | -82  | 3.27E-7 | 4.19E-6   | 3.83E-5   |
| MDA-MB-231/ATCC                   | 0.634     | 1.349               | 1.359 | 1.391 | 0.577                  | 0.584 | 0.064  | 101            | 106  | -9   | -8   | -90  | 3.06E-7 | 8.34E-7   | 3.26E-5   |
| HS 578T                           | 1.085     | 2.148               | 2.101 | 2.052 | 1.114                  | 0.987 | 0.567  | 96             | 91   | 3    | -9   | -48  | 2.91E-7 | 1.69E-6   | > 1.00E-4 |
| BT-549                            | 1.003     | 2.135               | 2.034 | 2.138 | 1.225                  | 0.853 | 0.026  | 91             | 100  | 20   | -15  | -97  | 4.19E-7 | 3.69E-6   | 2.66E-5   |
| T-47D                             | 0.952     | 2.411               | 2.253 | 2.261 | 1.923                  | 1.420 | 0.533  | 89             | 90   | 67   | 32   | -44  | 3.02E-6 | 2.64E-5   | > 1.00E-4 |
| MDA-MB-468                        | 0.702     | 1.639               | 1.562 | 1.568 | 0.507                  | 0.468 | -0.008 | 92             | 92   | -28  | -33  | -100 | 2.25E-7 | 5.87E-7   | 1.77E-5   |

# Compound 6a

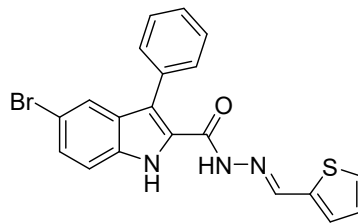

National Cancer Institute Developmental Therapeutics Program  
Dose Response Curves

NSC: D - 832474 / 1  
Report Date: January 25, 2022

SSPL: 1BCH  
EXP. ID: 2111NS16  
Test Date: November 29, 2021

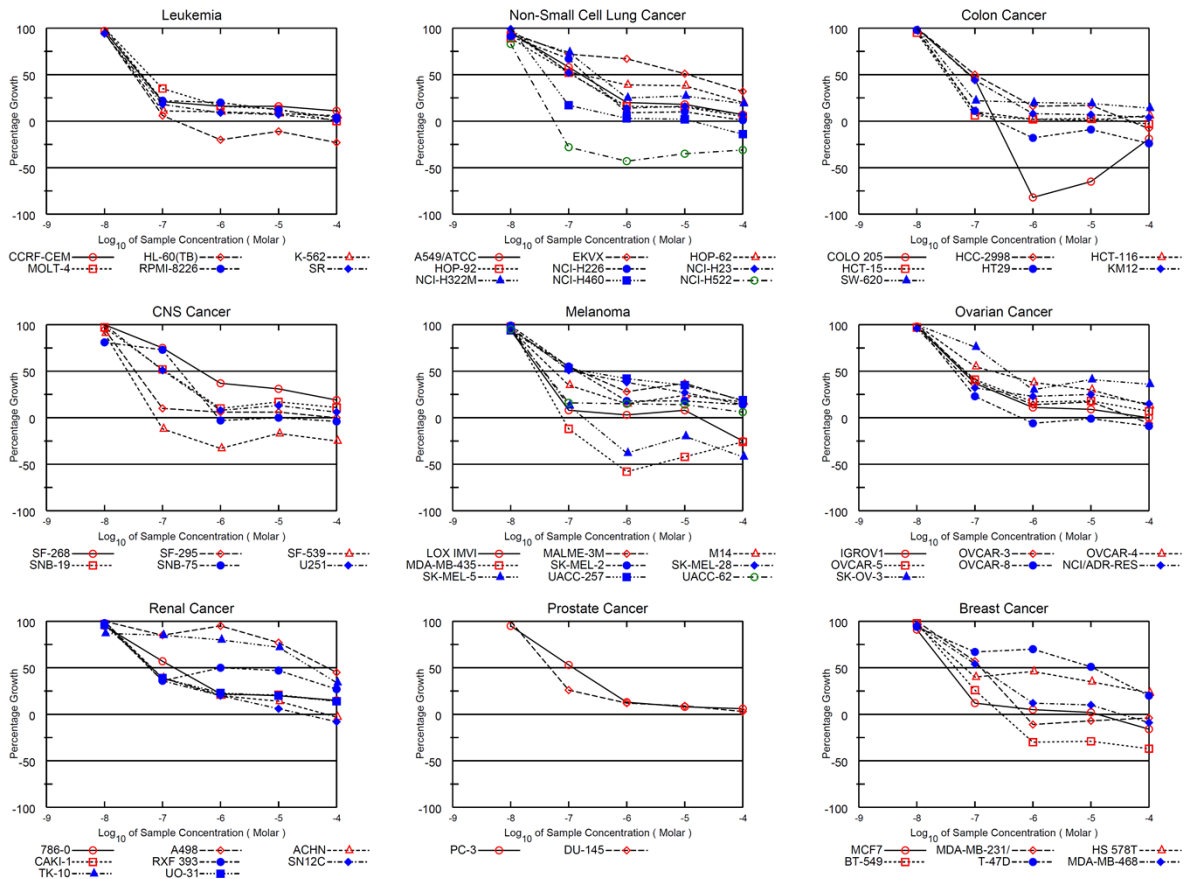



National Cancer Institute Developmental Therapeutics Program  
In-Vitro Testing Results

| NSC : D - 832474 / 1              |           | Experiment ID : 2111NS16              |       |       |       |       |       |                |      |      |      | Test Type : 08 |         | Units : Molar |           |
|-----------------------------------|-----------|---------------------------------------|-------|-------|-------|-------|-------|----------------|------|------|------|----------------|---------|---------------|-----------|
| Report Date : January 25, 2022    |           | Test Date : November 29, 2021         |       |       |       |       |       |                |      |      |      | QNS :          |         | MC :          |           |
| COMI : TO1                        |           | Stain Reagent : SRB Dual-Pass Related |       |       |       |       |       |                |      |      |      | SSPL : 1BCH    |         |               |           |
|                                   |           | Log10 Concentration                   |       |       |       |       |       |                |      |      |      |                |         |               |           |
| Panel/Cell Line                   | Time Zero | Mean Optical Densities                |       |       |       |       |       | Percent Growth |      |      |      |                | GI50    | TGI           | LC50      |
|                                   |           | Ctrl                                  | -8.0  | -7.0  | -6.0  | -5.0  | -4.0  | -8.0           | -7.0 | -6.0 | -5.0 | -4.0           |         |               |           |
| <b>Leukemia</b>                   |           |                                       |       |       |       |       |       |                |      |      |      |                |         |               |           |
| CCRF-CEM                          | 0.530     | 2.620                                 | 2.562 | 0.966 | 0.858 | 0.865 | 0.760 | 97             | 21   | 16   | 16   | 11             | 4.15E-8 | > 1.00E-4     | > 1.00E-4 |
| HL-60(TB)                         | 0.572     | 2.349                                 | 2.264 | 0.684 | 0.459 | 0.508 | 0.438 | 95             | 6    | -20  | -11  | -23            | 3.22E-8 | 1.74E-7       | > 1.00E-4 |
| K-562                             | 0.154     | 1.675                                 | 1.600 | 0.328 | 0.311 | 0.283 | 0.250 | 95             | 11   | 10   | 8    | 6              | 3.46E-8 | > 1.00E-4     | > 1.00E-4 |
| MOLT-4                            | 0.590     | 2.468                                 | 2.520 | 1.251 | 0.897 | 0.841 | 0.592 | 103            | 35   | 16   | 13   | 0              | 6.03E-8 | > 1.00E-4     | > 1.00E-4 |
| RPMI-8226                         | 0.581     | 2.511                                 | 2.513 | 0.997 | 0.969 | 0.813 | 0.659 | 100            | 22   | 20   | 12   | 4              | 4.34E-8 | > 1.00E-4     | > 1.00E-4 |
| SR                                | 0.371     | 1.788                                 | 1.699 | 0.625 | 0.496 | 0.467 | 0.390 | 94             | 18   | 9    | 7    | 1              | 3.77E-8 | > 1.00E-4     | > 1.00E-4 |
| <b>Non-Small Cell Lung Cancer</b> |           |                                       |       |       |       |       |       |                |      |      |      |                |         |               |           |
| A549/ATCC                         | 0.337     | 1.990                                 | 1.901 | 1.293 | 0.661 | 0.640 | 0.453 | 95             | 58   | 20   | 18   | 7              | 1.60E-7 | > 1.00E-4     | > 1.00E-4 |
| EKVX                              | 1.027     | 1.961                                 | 1.917 | 1.700 | 1.655 | 1.499 | 1.328 | 95             | 72   | 67   | 51   | 32             | 1.07E-5 | > 1.00E-4     | > 1.00E-4 |
| HOP-62                            | 0.707     | 1.803                                 | 1.756 | 1.292 | 1.139 | 1.120 | 0.926 | 96             | 53   | 39   | 38   | 20             | 1.74E-7 | > 1.00E-4     | > 1.00E-4 |
| HOP-92                            | 1.244     | 1.838                                 | 1.773 | 1.551 | 1.336 | 1.335 | 1.273 | 89             | 52   | 16   | 15   | 5              | 1.11E-7 | > 1.00E-4     | > 1.00E-4 |
| NCI-H226                          | 0.822     | 1.512                                 | 1.449 | 1.285 | 0.882 | 0.889 | 0.831 | 91             | 67   | 9    | 10   | 1              | 1.96E-7 | > 1.00E-4     | > 1.00E-4 |
| NCI-H23                           | 0.419     | 1.352                                 | 1.341 | 0.907 | 0.550 | 0.568 | 0.485 | 99             | 52   | 14   | 16   | 7              | 1.15E-7 | > 1.00E-4     | > 1.00E-4 |
| NCI-H322M                         | 0.810     | 2.006                                 | 1.926 | 1.693 | 1.109 | 1.129 | 1.042 | 93             | 74   | 25   | 27   | 19             | 3.07E-7 | > 1.00E-4     | > 1.00E-4 |
| NCI-H460                          | 0.323     | 3.021                                 | 3.074 | 0.787 | 0.411 | 0.385 | 0.277 | 102            | 17   | 3    | 2    | -14            | 4.10E-8 | 1.37E-5       | > 1.00E-4 |
| NCI-H522                          | 1.038     | 2.368                                 | 2.136 | 0.745 | 0.588 | 0.676 | 0.716 | 83             | -28  | -43  | -35  | -31            | 1.97E-8 | 5.56E-8       | > 1.00E-4 |
| <b>Colon Cancer</b>               |           |                                       |       |       |       |       |       |                |      |      |      |                |         |               |           |
| COLO 205                          | 0.628     | 2.391                                 | 2.430 | 1.418 | 0.111 | 0.222 | 0.509 | 102            | 45   | -82  | -65  | -19            | 8.12E-8 | 2.25E-7       | .         |
| HCC-2998                          | 0.495     | 1.563                                 | 1.586 | 1.031 | 0.666 | 0.678 | 0.458 | 102            | 50   | 16   | 17   | -8             | 1.01E-7 | 4.94E-5       | > 1.00E-4 |
| HCT-116                           | 0.228     | 2.367                                 | 2.300 | 0.435 | 0.269 | 0.249 | 0.344 | 97             | 10   | 2    | 1    | 6              | 3.45E-8 | > 1.00E-4     | > 1.00E-4 |
| HCT-15                            | 0.217     | 1.430                                 | 1.372 | 0.284 | 0.236 | 0.259 | 0.210 | 95             | 6    | 2    | 3    | -3             | 3.19E-8 | 3.27E-5       | > 1.00E-4 |
| HT29                              | 0.373     | 2.217                                 | 2.185 | 0.584 | 0.306 | 0.338 | 0.285 | 98             | 11   | -18  | -9   | -24            | 3.59E-8 | 2.44E-7       | > 1.00E-4 |
| KM12                              | 0.833     | 3.331                                 | 3.366 | 1.921 | 1.037 | 1.005 | 0.934 | 101            | 44   | 8    | 7    | 4              | 7.74E-8 | > 1.00E-4     | > 1.00E-4 |
| SW-620                            | 0.333     | 2.442                                 | 2.440 | 0.796 | 0.755 | 0.739 | 0.624 | 100            | 22   | 20   | 19   | 14             | 4.37E-8 | > 1.00E-4     | > 1.00E-4 |
| <b>CNS Cancer</b>                 |           |                                       |       |       |       |       |       |                |      |      |      |                |         |               |           |
| SF-268                            | 1.079     | 2.902                                 | 2.908 | 2.448 | 1.746 | 1.643 | 1.422 | 100            | 75   | 37   | 31   | 19             | 4.48E-7 | > 1.00E-4     | > 1.00E-4 |
| SF-295                            | 0.472     | 1.907                                 | 1.842 | 0.614 | 0.552 | 0.564 | 0.471 | 95             | 10   | 6    | 6    | 0              | 3.40E-8 | 8.96E-5       | > 1.00E-4 |
| SF-539                            | 0.563     | 1.808                                 | 1.702 | 0.495 | 0.378 | 0.468 | 0.425 | 91             | -12  | -33  | -17  | -25            | 2.52E-8 | 7.64E-8       | > 1.00E-4 |
| SNB-19                            | 0.527     | 1.789                                 | 1.746 | 1.178 | 0.653 | 0.745 | 0.670 | 97             | 52   | 10   | 17   | 11             | 1.09E-7 | > 1.00E-4     | > 1.00E-4 |
| SNB-75                            | 2.216     | 3.142                                 | 2.967 | 2.896 | 2.142 | 2.209 | 2.135 | 81             | 73   | -3   | 0    | -4             | 2.02E-7 | 9.04E-7       | > 1.00E-4 |
| U251                              | 0.581     | 2.752                                 | 2.756 | 1.692 | 0.762 | 0.860 | 0.708 | 100            | 51   | 8    | 13   | 6              | 1.06E-7 | > 1.00E-4     | > 1.00E-4 |
| <b>Melanoma</b>                   |           |                                       |       |       |       |       |       |                |      |      |      |                |         |               |           |
| LOX IMVI                          | 0.163     | 1.172                                 | 1.109 | 0.241 | 0.192 | 0.244 | 0.122 | 94             | 8    | 3    | 8    | -25            | 3.23E-8 | 1.74E-5       | > 1.00E-4 |
| MALME-3M                          | 0.726     | 1.419                                 | 1.386 | 1.105 | 0.922 | 0.979 | 0.853 | 95             | 55   | 28   | 37   | 18             | 1.50E-7 | > 1.00E-4     | > 1.00E-4 |
| M14                               | 0.470     | 1.990                                 | 1.915 | 1.001 | 0.701 | 0.832 | 0.731 | 95             | 35   | 15   | 24   | 17             | 5.62E-8 | > 1.00E-4     | > 1.00E-4 |
| MDA-MB-435                        | 0.779     | 3.068                                 | 3.016 | 0.688 | 0.325 | 0.450 | 0.576 | 98             | -12  | -58  | -42  | -26            | 2.73E-8 | 7.81E-8       | .         |
| SK-MEL-2                          | 1.232     | 2.648                                 | 2.637 | 2.007 | 1.492 | 1.484 | 1.425 | 99             | 55   | 18   | 18   | 14             | 1.35E-7 | > 1.00E-4     | > 1.00E-4 |
| SK-MEL-28                         | 0.523     | 1.696                                 | 1.659 | 1.127 | 0.970 | 0.837 | 0.690 | 97             | 51   | 38   | 27   | 14             | 1.29E-7 | > 1.00E-4     | > 1.00E-4 |
| SK-MEL-5                          | 0.640     | 2.703                                 | 2.637 | 0.918 | 0.400 | 0.512 | 0.374 | 97             | 13   | -38  | -20  | -42            | 3.64E-8 | 1.84E-7       | > 1.00E-4 |
| UACC-257                          | 0.948     | 2.514                                 | 2.422 | 1.785 | 1.609 | 1.489 | 1.239 | 94             | 53   | 42   | 35   | 19             | 2.03E-7 | > 1.00E-4     | > 1.00E-4 |
| UACC-62                           | 0.837     | 2.788                                 | 2.698 | 1.158 | 1.121 | 1.114 | 0.962 | 95             | 16   | 15   | 14   | 6              | 3.76E-8 | > 1.00E-4     | > 1.00E-4 |
| <b>Ovarian Cancer</b>             |           |                                       |       |       |       |       |       |                |      |      |      |                |         |               |           |
| IGROV1                            | 0.501     | 2.132                                 | 2.105 | 1.104 | 0.687 | 0.649 | 0.507 | 98             | 37   | 11   | 9    | 0              | 6.14E-8 | > 1.00E-4     | > 1.00E-4 |
| OVCAR-3                           | 1.057     | 2.785                                 | 2.886 | 1.727 | 1.298 | 1.345 | 0.991 | 106            | 39   | 14   | 17   | -6             | 6.80E-8 | 5.32E-5       | > 1.00E-4 |
| OVCAR-4                           | 0.841     | 1.916                                 | 1.917 | 1.427 | 1.252 | 1.161 | 0.979 | 100            | 55   | 38   | 30   | 13             | 1.89E-7 | > 1.00E-4     | > 1.00E-4 |
| OVCAR-5                           | 0.567     | 1.670                                 | 1.636 | 1.017 | 0.756 | 0.767 | 0.646 | 97             | 41   | 17   | 18   | 7              | 6.85E-8 | > 1.00E-4     | > 1.00E-4 |
| OVCAR-8                           | 0.512     | 2.538                                 | 2.535 | 0.969 | 0.480 | 0.506 | 0.466 | 100            | 23   | -6   | -1   | -9             | 4.42E-8 | 6.07E-7       | > 1.00E-4 |
| NCI/ADR-RES                       | 0.370     | 1.339                                 | 1.301 | 0.681 | 0.594 | 0.612 | 0.511 | 96             | 32   | 23   | 25   | 15             | 5.25E-8 | > 1.00E-4     | > 1.00E-4 |
| SK-OV-3                           | 0.967     | 1.787                                 | 1.827 | 1.587 | 1.216 | 1.307 | 1.265 | 105            | 76   | 30   | 41   | 36             | 3.68E-7 | > 1.00E-4     | > 1.00E-4 |
| <b>Renal Cancer</b>               |           |                                       |       |       |       |       |       |                |      |      |      |                |         |               |           |
| 786-0                             | 0.578     | 2.417                                 | 2.322 | 1.623 | 0.988 | 0.940 | 0.849 | 95             | 57   | 22   | 20   | 15             | 1.58E-7 | > 1.00E-4     | > 1.00E-4 |
| A498                              | 1.326     | 2.081                                 | 2.104 | 1.970 | 2.042 | 1.908 | 1.667 | 103            | 85   | 95   | 77   | 45             | 7.01E-5 | > 1.00E-4     | > 1.00E-4 |
| ACHN                              | 0.286     | 1.147                                 | 1.170 | 0.618 | 0.458 | 0.410 | 0.278 | 103            | 39   | 20   | 14   | -3             | 6.64E-8 | 6.87E-5       | > 1.00E-4 |
| CAKI-1                            | 0.680     | 2.241                                 | 2.190 | 1.294 | 1.005 | 1.009 | 0.906 | 97             | 39   | 21   | 21   | 14             | 6.51E-8 | > 1.00E-4     | > 1.00E-4 |
| RXF 393                           | 0.651     | 1.194                                 | 1.184 | 0.846 | 0.924 | 0.909 | 0.800 | 98             | 36   | 50   | 47   | 27             | .       | > 1.00E-4     | > 1.00E-4 |
| SN12C                             | 0.520     | 1.847                                 | 1.951 | 1.003 | 0.788 | 0.595 | 0.480 | 108            | 36   | 20   | 6    | -8             | 6.45E-8 | 2.62E-5       | > 1.00E-4 |
| TK-10                             | 1.216     | 2.007                                 | 1.904 | 1.886 | 1.852 | 1.782 | 1.486 | 87             | 85   | 80   | 72   | 34             | 3.77E-5 | > 1.00E-4     | > 1.00E-4 |
| UO-31                             | 0.500     | 2.104                                 | 2.037 | 1.131 | 0.869 | 0.815 | 0.726 | 96             | 39   | 23   | 20   | 14             | 6.47E-8 | > 1.00E-4     | > 1.00E-4 |
| <b>Prostate Cancer</b>            |           |                                       |       |       |       |       |       |                |      |      |      |                |         |               |           |
| PC-3                              | 0.628     | 2.141                                 | 2.067 | 1.425 | 0.829 | 0.753 | 0.725 | 95             | 53   | 13   | 8    | 6              | 1.17E-7 | > 1.00E-4     | > 1.00E-4 |
| DU-145                            | 0.333     | 1.647                                 | 1.699 | 0.677 | 0.486 | 0.455 | 0.372 | 104            | 26   | 12   | 9    | 3              | 4.93E-8 | > 1.00E-4     | > 1.00E-4 |
| <b>Breast Cancer</b>              |           |                                       |       |       |       |       |       |                |      |      |      |                |         |               |           |
| MCF7                              | 0.186     | 0.921                                 | 0.855 | 0.276 | 0.226 | 0.200 | 0.156 | 91             | 12   | 5    | 2    | -16            | 3.31E-8 | 1.26E-5       | > 1.00E-4 |
| MDA-MB-231/ATCC                   | 0.554     | 1.369                                 | 1.379 | 1.022 | 0.492 | 0.515 | 0.535 | 101            | 57   | -11  | -7   | -4             | 1.28E-7 | 6.87E-7       | > 1.00E-4 |
| HS 578T                           | 1.525     | 2.719                                 | 2.677 | 2.004 | 2.077 | 1.941 | 1.802 | 96             | 40   | 46   | 35   | 23             | 6.68E-8 | > 1.00E-4     | > 1.00E-4 |
| BT-549                            | 1.016     | 2.041                                 | 2.026 | 1.287 | 0.708 | 0.726 | 0.644 | 98             | 26   | -30  | -29  | -37            | 4.71E-8 | 2.92E-7       | > 1.00E-4 |
| T-47D                             | 1.368     | 3.101                                 | 2.989 | 2.521 | 2.580 | 2.257 | 1.717 | 94             | 67   | 70   | 51   | 20             | 1.10E-5 | > 1.00E-4     | > 1.00E-4 |
| MDA-MB-468                        | 0.702     | 1.363                                 | 1.335 | 1.056 | 0.784 | 0.766 | 0.637 | 96             | 54   | 12   | 10   | -9             | 1.22E-7 | 3.22E-5       | > 1.00E-4 |

# Compound 6b

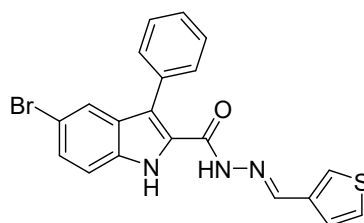

National Cancer Institute Developmental Therapeutics Program  
Dose Response Curves

NSC: D - 834623 / 1  
Report Date: June 26, 2022

SSPL: 1BCH  
Test Date: May 16, 2022  
EXP. ID: 2205RS21

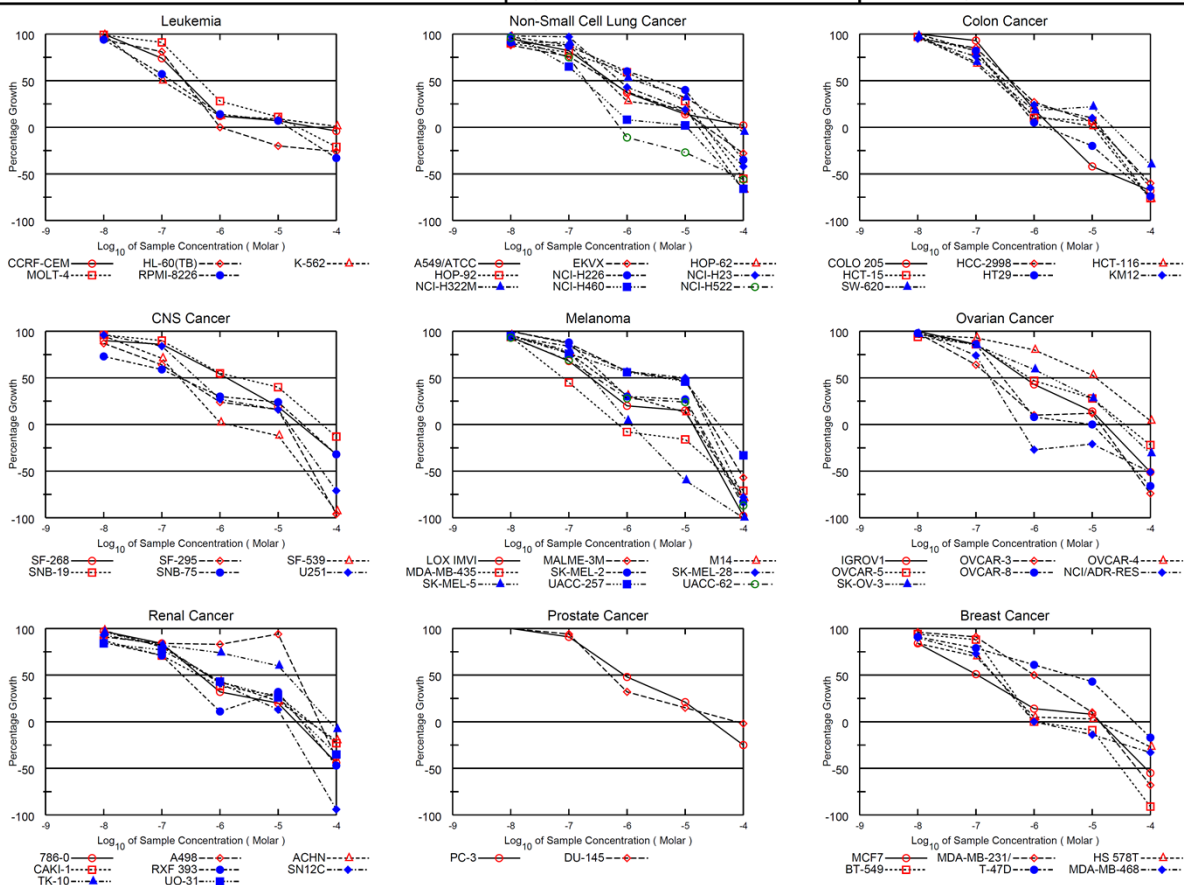

National Cancer Institute Developmental Therapeutics Program  
In-Vitro Testing Results

|                             |                                       |                |               |
|-----------------------------|---------------------------------------|----------------|---------------|
| NSC : D - 834623 / 1        | Experiment ID : 2205RS21              | Test Type : 08 | Units : Molar |
| Report Date : June 26, 2022 | Test Date : May 16, 2022              | QNS :          | MC :          |
| COMI : TO16                 | Stain Reagent : SRB Dual-Pass Related | SSPL : 1BCH    |               |

| Panel/Cell Line                   | Time Zero | Log10 Concentration    |       |       |       |       |       |                |      |      |      | GI50 | TGI     | LC50      |           |
|-----------------------------------|-----------|------------------------|-------|-------|-------|-------|-------|----------------|------|------|------|------|---------|-----------|-----------|
|                                   |           | Mean Optical Densities |       |       |       |       |       | Percent Growth |      |      |      |      |         |           |           |
|                                   |           | Ctrl                   | -8.0  | -7.0  | -6.0  | -5.0  | -4.0  | -8.0           | -7.0 | -6.0 | -5.0 |      |         |           | -4.0      |
| <b>Leukemia</b>                   |           |                        |       |       |       |       |       |                |      |      |      |      |         |           |           |
| CCR-F-CEM                         | 0.530     | 2.317                  | 2.332 | 1.845 | 0.748 | 0.648 | 0.509 | 101            | 74   | 12   | 7    | -4   | 2.42E-7 | 4.21E-5   | > 1.00E-4 |
| HL-60(TB)                         | 0.688     | 2.534                  | 2.426 | 2.190 | 0.682 | 0.548 | 0.511 | 94             | 81   | 0    | -20  | -26  | 2.40E-7 | 9.74E-7   | > 1.00E-4 |
| K-562                             | 0.176     | 1.686                  | 1.667 | 0.935 | 0.359 | 0.310 | 0.194 | 99             | 50   | 12   | 9    | 1    | 1.02E-7 | > 1.00E-4 | > 1.00E-4 |
| MOLT-4                            | 0.657     | 2.725                  | 2.699 | 2.533 | 1.239 | 0.876 | 0.517 | 99             | 91   | 28   | 11   | -21  | 4.47E-7 | 2.14E-5   | > 1.00E-4 |
| RPMI-8226                         | 0.614     | 2.617                  | 2.506 | 1.759 | 0.888 | 0.754 | 0.412 | 94             | 57   | 14   | 7    | -33  | 1.46E-7 | 1.50E-5   | > 1.00E-4 |
| <b>Non-Small Cell Lung Cancer</b> |           |                        |       |       |       |       |       |                |      |      |      |      |         |           |           |
| A549/ATCC                         | 0.494     | 2.297                  | 2.213 | 1.974 | 1.159 | 0.755 | 0.533 | 95             | 82   | 37   | 14   | 2    | 5.12E-7 | > 1.00E-4 | > 1.00E-4 |
| EKVX                              | 0.607     | 1.942                  | 1.780 | 1.621 | 1.119 | 0.819 | 0.439 | 88             | 76   | 38   | 16   | -28  | 4.90E-7 | 2.31E-5   | > 1.00E-4 |
| HOP-62                            | 0.777     | 2.486                  | 2.430 | 2.289 | 1.262 | 1.122 | 0.255 | 97             | 88   | 28   | 20   | -67  | 4.37E-7 | 1.70E-5   | 6.36E-5   |
| HOP-92                            | 1.219     | 1.908                  | 1.837 | 1.768 | 1.627 | 1.415 | 0.550 | 90             | 80   | 59   | 28   | -55  | 1.99E-6 | 2.19E-5   | 8.73E-5   |
| NCI-H226                          | 0.799     | 1.949                  | 1.846 | 1.796 | 1.494 | 1.257 | 0.522 | 91             | 87   | 60   | 40   | -35  | 3.21E-6 | 3.43E-5   | > 1.00E-4 |
| NCI-H23                           | 0.592     | 1.833                  | 1.803 | 1.795 | 1.125 | 0.822 | 0.346 | 98             | 97   | 43   | 19   | -42  | 7.39E-7 | 2.03E-5   | > 1.00E-4 |
| NCI-H322M                         | 0.872     | 2.203                  | 2.084 | 2.088 | 1.577 | 1.292 | 0.827 | 91             | 91   | 53   | 32   | -5   | 1.38E-6 | 7.21E-5   | > 1.00E-4 |
| NCI-H460                          | 0.272     | 2.585                  | 2.590 | 1.776 | 0.462 | 0.330 | 0.094 | 100            | 65   | 8    | 2    | -66  | 3.13E-7 | 1.38E-5   | 5.90E-5   |
| NCI-H522                          | 1.467     | 3.187                  | 3.113 | 2.761 | 1.305 | 1.066 | 0.641 | 96             | 75   | -11  | -27  | -56  | 1.96E-7 | 7.44E-7   | 6.06E-5   |
| <b>Colon Cancer</b>               |           |                        |       |       |       |       |       |                |      |      |      |      |         |           |           |
| COLO 205                          | 0.668     | 2.310                  | 2.418 | 2.197 | 0.978 | 0.388 | 0.215 | 107            | 93   | 19   | -42  | -68  | 3.81E-7 | 2.04E-6   | 2.05E-5   |
| HCC-2998                          | 0.612     | 2.185                  | 2.111 | 1.956 | 1.029 | 0.707 | 0.243 | 95             | 85   | 27   | 6    | -60  | 3.99E-7 | 1.23E-5   | 7.00E-5   |
| HCT-116                           | 0.286     | 2.766                  | 2.692 | 1.967 | 0.585 | 0.314 | 0.067 | 97             | 68   | 12   | 1    | -77  | 2.09E-7 | 1.03E-5   | 4.53E-5   |
| HCT-15                            | 0.504     | 2.740                  | 2.666 | 2.333 | 0.722 | 0.672 | 0.123 | 97             | 82   | 10   | 7    | -76  | 2.76E-7 | 1.23E-5   | 4.91E-5   |
| HT29                              | 0.322     | 1.895                  | 1.968 | 1.613 | 0.400 | 0.259 | 0.084 | 105            | 82   | 5    | -20  | -74  | 2.61E-7 | 1.59E-6   | 3.63E-5   |
| KM12                              | 0.525     | 2.762                  | 2.661 | 2.225 | 1.053 | 0.759 | 0.186 | 95             | 76   | 24   | 10   | -65  | 3.13E-7 | 1.38E-5   | 6.38E-5   |
| SW-620                            | 0.282     | 1.969                  | 1.935 | 1.461 | 0.586 | 0.661 | 0.169 | 98             | 70   | 18   | 22   | -40  | 2.42E-7 | 2.29E-5   | > 1.00E-4 |
| <b>CNS Cancer</b>                 |           |                        |       |       |       |       |       |                |      |      |      |      |         |           |           |
| SF-268                            | 0.997     | 2.726                  | 2.557 | 2.489 | 1.939 | 1.331 | 0.673 | 90             | 86   | 54   | 19   | -32  | 1.34E-6 | 2.36E-5   | > 1.00E-4 |
| SF-295                            | 0.729     | 2.513                  | 2.284 | 1.867 | 1.164 | 1.013 | 0.028 | 87             | 64   | 24   | 16   | -96  | 2.24E-7 | 1.39E-5   | 3.87E-5   |
| SF-539                            | 0.595     | 2.031                  | 1.958 | 1.619 | 0.625 | 0.527 | 0.041 | 95             | 71   | 2    | -12  | -93  | 2.03E-7 | 1.42E-6   | 2.96E-5   |
| SNB-19                            | 0.778     | 2.140                  | 2.084 | 2.005 | 1.521 | 1.320 | 0.678 | 96             | 90   | 55   | 40   | -13  | 2.03E-6 | 5.70E-5   | > 1.00E-4 |
| SNB-75                            | 1.350     | 2.418                  | 2.132 | 1.982 | 1.666 | 1.608 | 0.920 | 73             | 59   | 30   | 24   | -32  | 2.04E-7 | 2.70E-5   | > 1.00E-4 |
| U251                              | 0.364     | 1.769                  | 1.716 | 1.539 | 0.737 | 0.593 | 0.106 | 96             | 84   | 27   | 16   | -71  | 3.88E-7 | 1.54E-5   | 5.75E-5   |
| <b>Melanoma</b>                   |           |                        |       |       |       |       |       |                |      |      |      |      |         |           |           |
| LOX IMVI                          | 0.358     | 2.419                  | 2.286 | 1.760 | 0.767 | 0.676 | 0.006 | 94             | 68   | 20   | 15   | -98  | 2.37E-7 | 1.37E-5   | 3.75E-5   |
| MALME-3M                          | 0.613     | 1.313                  | 1.312 | 1.223 | 1.014 | 0.940 | 0.262 | 100            | 87   | 57   | 47   | -57  | 4.85E-6 | 2.81E-5   | 8.51E-5   |
| M14                               | 0.419     | 1.769                  | 1.712 | 1.452 | 0.833 | 0.591 | 0.087 | 96             | 77   | 31   | 13   | -79  | 3.79E-7 | 1.38E-5   | 4.81E-5   |
| MDA-MB-435                        | 0.621     | 2.668                  | 2.536 | 1.542 | 0.573 | 0.523 | 0.178 | 94             | 45   | -8   | -16  | -71  | 7.89E-8 | 7.14E-5   | 4.13E-5   |
| SK-MEL-2                          | 0.850     | 2.428                  | 2.456 | 2.239 | 1.319 | 1.271 | 0.144 | 102            | 88   | 30   | 27   | -83  | 4.48E-7 | 1.75E-5   | 4.99E-5   |
| SK-MEL-28                         | 0.690     | 1.933                  | 1.860 | 1.734 | 1.402 | 1.308 | 0.153 | 94             | 84   | 57   | 50   | -78  | 9.23E-6 | 2.45E-5   | 6.05E-5   |
| SK-MEL-5                          | 1.042     | 3.177                  | 3.067 | 2.724 | 1.138 | 0.416 | 0.002 | 95             | 79   | 4    | -60  | -100 | 2.44E-7 | 1.17E-6   | 6.97E-6   |
| UACC-257                          | 1.034     | 2.343                  | 2.281 | 2.034 | 1.769 | 1.641 | 0.692 | 95             | 76   | 56   | 46   | -33  | 4.25E-6 | 3.83E-5   | > 1.00E-4 |
| UACC-62                           | 0.758     | 2.383                  | 2.273 | 1.884 | 1.218 | 1.151 | 0.099 | 93             | 69   | 28   | 24   | -87  | 2.95E-7 | 1.65E-5   | 4.65E-5   |
| <b>Ovarian Cancer</b>             |           |                        |       |       |       |       |       |                |      |      |      |      |         |           |           |
| IGROV1                            | 0.808     | 2.532                  | 2.551 | 2.291 | 1.553 | 1.057 | 0.398 | 101            | 86   | 43   | 14   | -51  | 6.95E-7 | 1.66E-5   | 9.72E-5   |
| OVCAR-3                           | 0.282     | 1.131                  | 1.113 | 0.828 | 0.371 | 0.386 | 0.075 | 98             | 64   | 10   | 12   | -74  | 1.85E-7 | 1.39E-5   | 5.31E-5   |
| OVCAR-4                           | 0.639     | 1.748                  | 1.701 | 1.671 | 1.522 | 1.222 | 0.682 | 96             | 93   | 80   | 53   | 4    | 1.13E-5 | > 1.00E-4 | > 1.00E-4 |
| OVCAR-5                           | 0.622     | 1.507                  | 1.455 | 1.382 | 1.035 | 0.866 | 0.483 | 94             | 86   | 47   | 28   | -22  | 8.20E-7 | 3.56E-5   | > 1.00E-4 |
| OVCAR-8                           | 0.494     | 2.210                  | 2.172 | 1.967 | 0.630 | 0.498 | 0.166 | 98             | 86   | 8    | 0    | -66  | 2.88E-7 | 1.01E-5   | 5.66E-5   |
| NCI/ADR-RES                       | 0.568     | 1.855                  | 1.903 | 1.515 | 0.415 | 0.450 | 0.280 | 104            | 74   | -27  | -21  | -51  | 1.72E-7 | 5.39E-7   | 9.47E-5   |
| SK-OV-3                           | 0.943     | 2.258                  | 2.219 | 2.062 | 1.725 | 1.306 | 0.655 | 97             | 85   | 59   | 28   | -31  | 1.98E-6 | 2.98E-5   | > 1.00E-4 |
| <b>Renal Cancer</b>               |           |                        |       |       |       |       |       |                |      |      |      |      |         |           |           |
| 786-0                             | 0.851     | 2.948                  | 2.894 | 2.604 | 1.521 | 1.262 | 0.481 | 97             | 84   | 32   | 20   | -44  | 4.47E-7 | 2.04E-5   | > 1.00E-4 |
| A498                              | 1.410     | 2.082                  | 2.020 | 1.975 | 1.967 | 2.041 | 0.858 | 91             | 84   | 83   | 94   | -39  | 2.14E-5 | 5.08E-5   | > 1.00E-4 |
| ACHN                              | 0.397     | 1.749                  | 1.715 | 1.478 | 0.975 | 0.700 | 0.317 | 98             | 80   | 43   | 22   | -20  | 6.39E-7 | 3.35E-5   | > 1.00E-4 |
| CAKI-1                            | 0.555     | 2.201                  | 1.992 | 1.725 | 1.189 | 1.009 | 0.427 | 87             | 71   | 38   | 28   | -23  | 4.44E-7 | 3.50E-5   | > 1.00E-4 |
| RXF 393                           | 1.247     | 1.754                  | 1.680 | 1.608 | 1.301 | 1.409 | 0.667 | 85             | 71   | 11   | 32   | -47  | 2.24E-7 | 2.55E-5   | > 1.00E-4 |
| SN12C                             | 0.894     | 2.898                  | 2.758 | 2.544 | 1.723 | 1.154 | 0.050 | 93             | 82   | 41   | 13   | -94  | 6.15E-7 | 1.32E-5   | 3.86E-5   |
| TK-10                             | 1.145     | 2.222                  | 2.184 | 2.030 | 1.940 | 1.788 | 1.056 | 96             | 82   | 74   | 60   | -8   | 1.39E-5 | 7.67E-5   | > 1.00E-4 |
| UO-31                             | 0.917     | 2.413                  | 2.175 | 2.068 | 1.557 | 1.311 | 0.599 | 84             | 77   | 43   | 26   | -35  | 6.14E-7 | 2.70E-5   | > 1.00E-4 |
| <b>Prostate Cancer</b>            |           |                        |       |       |       |       |       |                |      |      |      |      |         |           |           |
| PC-3                              | 0.603     | 2.378                  | 2.386 | 2.211 | 1.458 | 0.971 | 0.452 | 100            | 91   | 48   | 21   | -25  | 9.06E-7 | 2.84E-5   | > 1.00E-4 |
| DU-145                            | 0.347     | 1.592                  | 1.604 | 1.514 | 0.741 | 0.528 | 0.339 | 101            | 94   | 32   | 15   | -2   | 5.06E-7 | 7.30E-5   | > 1.00E-4 |
| <b>Breast Cancer</b>              |           |                        |       |       |       |       |       |                |      |      |      |      |         |           |           |
| MCF7                              | 0.579     | 2.435                  | 2.143 | 1.530 | 0.831 | 0.722 | 0.261 | 84             | 51   | 14   | 8    | -55  | 1.08E-7 | 1.33E-5   | 8.34E-5   |
| MDA-MB-231/ATCC                   | 0.616     | 1.567                  | 1.527 | 1.482 | 1.088 | 0.709 | 0.198 | 96             | 91   | 50   | 10   | -68  | 9.76E-7 | 1.33E-5   | 5.89E-5   |
| HS 578T                           | 1.342     | 2.268                  | 2.121 | 1.989 | 1.385 | 1.371 | 0.982 | 84             | 70   | 5    | 3    | -27  | 2.01E-7 | 1.27E-5   | > 1.00E-4 |
| BT-549                            | 1.345     | 2.472                  | 2.402 | 2.334 | 1.345 | 1.230 | 0.122 | 94             | 88   | 0    | -9   | -91  | 2.69E-7 | 9.99E-7   | 3.19E-5   |
| T-47D                             | 1.225     | 2.744                  | 2.611 | 2.418 | 2.147 | 1.874 | 1.019 | 91             | 79   | 61   | 43   | -17  | 3.93E-6 | 5.21E-5   | > 1.00E-4 |
| MDA-MB-468                        | 0.913     | 1.959                  | 1.860 | 1.675 | 0.912 | 0.783 | 0.616 | 90             | 73   | 0    | -14  | -33  | 2.05E-7 | 9.95E-7   | > 1.00E-4 |



# Compound 6c

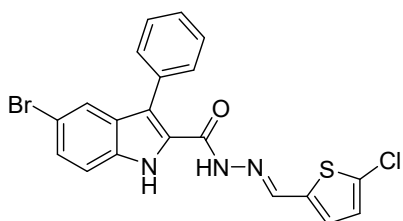

National Cancer Institute Developmental Therapeutics Program  
Dose Response Curves

NSC: D - 832475 / 1  
Report Date: January 25, 2022

SSPL: 1BCH  
EXP. ID: 2111NS16  
Test Date: November 29, 2021

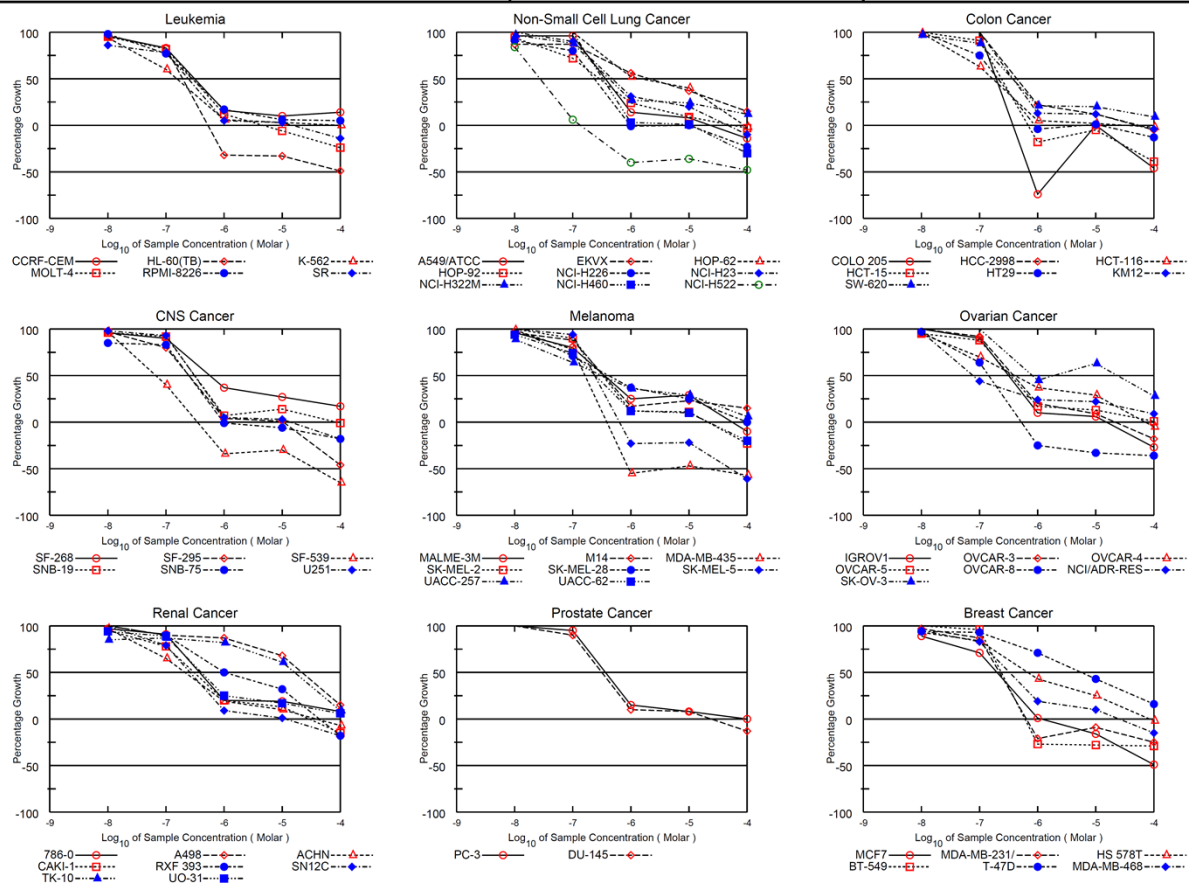

National Cancer Institute Developmental Therapeutics Program  
In-Vitro Testing Results

| NSC : D - 832475 / 1           |           | Experiment ID : 2111NS16              |       |       |       |       |       |                |      |      |      | Test Type : 08 |         | Units : Molar |           |      |
|--------------------------------|-----------|---------------------------------------|-------|-------|-------|-------|-------|----------------|------|------|------|----------------|---------|---------------|-----------|------|
| Report Date : January 25, 2022 |           | Test Date : November 29, 2021         |       |       |       |       |       |                |      |      |      | QNS :          |         | MC :          |           |      |
| COMI : TO2                     |           | Stain Reagent : SRB Dual-Pass Related |       |       |       |       |       |                |      |      |      | SSPL : 1BCH    |         |               |           |      |
| Panel/Cell Line                | Time Zero | Log10 Concentration                   |       |       |       |       |       | Percent Growth |      |      |      |                |         | GI50          | TGI       | LC50 |
|                                |           | Ctrl                                  | -8.0  | -7.0  | -6.0  | -5.0  | -4.0  | -8.0           | -7.0 | -6.0 | -5.0 | -4.0           |         |               |           |      |
| Leukemia                       |           |                                       |       |       |       |       |       |                |      |      |      |                |         |               |           |      |
| CCR-F-CEM                      | 0.530     | 2.659                                 | 2.566 | 2.300 | 0.868 | 0.754 | 0.821 | 96             | 83   | 16   | 10   | 14             | 3.11E-7 | > 1.00E-4     | > 1.00E-4 |      |
| HL-60(TB)                      | 0.572     | 2.467                                 | 2.389 | 2.142 | 0.388 | 0.386 | 0.293 | 96             | 83   | -32  | -33  | -49            | 1.93E-7 | 5.25E-7       | > 1.00E-4 |      |
| K-562                          | 0.154     | 1.604                                 | 1.521 | 1.019 | 0.247 | 0.194 | 0.153 | 94             | 60   | 6    | 3    | 0              | 1.52E-7 | 5.45E-5       | > 1.00E-4 |      |
| MOLT-4                         | 0.590     | 2.502                                 | 2.402 | 2.159 | 0.829 | 0.553 | 0.448 | 95             | 82   | 12   | -6   | -24            | 2.89E-7 | 4.60E-6       | > 1.00E-4 |      |
| RPMI-8226                      | 0.581     | 2.538                                 | 2.502 | 2.085 | 0.915 | 0.701 | 0.688 | 98             | 77   | 17   | 6    | 5              | 2.81E-7 | > 1.00E-4     | > 1.00E-4 |      |
| SR                             | 0.371     | 1.648                                 | 1.465 | 1.367 | 0.439 | 0.407 | 0.319 | 86             | 78   | 5    | 3    | -14            | 2.43E-7 | 1.46E-5       | > 1.00E-4 |      |
| Non-Small Cell Lung Cancer     |           |                                       |       |       |       |       |       |                |      |      |      |                |         |               |           |      |
| A549/ATCC                      | 0.337     | 1.965                                 | 1.906 | 1.899 | 0.565 | 0.471 | 0.289 | 96             | 96   | 14   | 8    | -14            | 3.64E-7 | 2.32E-5       | > 1.00E-4 |      |
| EKVX                           | 1.027     | 1.933                                 | 1.811 | 1.811 | 1.538 | 1.362 | 1.159 | 87             | 87   | 56   | 37   | 15             | 2.13E-6 | > 1.00E-4     | > 1.00E-4 |      |
| HOP-62                         | 0.707     | 1.862                                 | 1.874 | 1.860 | 1.308 | 1.168 | 0.690 | 101            | 100  | 52   | 40   | -2             | 1.48E-6 | 8.74E-5       | > 1.00E-4 |      |
| HOP-92                         | 1.244     | 1.993                                 | 1.945 | 1.785 | 1.421 | 1.315 | 1.201 | 94             | 72   | 24   | 9    | -3             | 2.87E-7 | 5.41E-5       | > 1.00E-4 |      |
| NCI-H226                       | 0.822     | 1.472                                 | 1.416 | 1.342 | 0.810 | 0.818 | 0.635 | 91             | 80   | -1   | 0    | -23            | 2.33E-7 | 9.60E-7       | > 1.00E-4 |      |
| NCI-H23                        | 0.419     | 1.403                                 | 1.400 | 1.305 | 0.728 | 0.613 | 0.379 | 100            | 90   | 31   | 20   | -10            | 4.82E-7 | 4.71E-5       | > 1.00E-4 |      |
| NCI-H322M                      | 0.810     | 1.999                                 | 1.959 | 1.860 | 1.130 | 1.098 | 0.954 | 97             | 88   | 27   | 24   | 12             | 4.21E-7 | > 1.00E-4     | > 1.00E-4 |      |
| NCI-H460                       | 0.323     | 2.970                                 | 3.058 | 2.967 | 0.406 | 0.337 | 0.228 | 103            | 100  | 3    | 1    | -30            | 3.28E-7 | 1.04E-5       | > 1.00E-4 |      |
| NCI-H522                       | 1.038     | 2.406                                 | 2.191 | 1.115 | 0.623 | 0.663 | 0.536 | 84             | 6    | -40  | -36  | -48            | 2.73E-8 | 1.33E-7       | > 1.00E-4 |      |
| Colon Cancer                   |           |                                       |       |       |       |       |       |                |      |      |      |                |         |               |           |      |
| COLO 205                       | 0.628     | 2.549                                 | 2.631 | 2.650 | 0.166 | 0.625 | 0.337 | 104            | 105  | -74  | 0    | -46            | 2.04E-7 | 3.88E-7       |           |      |
| HCC-2998                       | 0.495     | 1.567                                 | 1.659 | 1.630 | 0.732 | 0.624 | 0.470 | 109            | 106  | 22   | 12   | -5             | 4.65E-7 | 5.06E-5       | > 1.00E-4 |      |
| HCT-116                        | 0.226     | 2.341                                 | 2.313 | 1.556 | 0.334 | 0.275 | 0.223 | 99             | 63   | 5    | 2    | -2             | 1.67E-7 | 3.95E-5       | > 1.00E-4 |      |
| HCT-15                         | 0.217     | 1.390                                 | 1.409 | 1.283 | 0.179 | 0.206 | 0.133 | 102            | 91   | -18  | -5   | -39            | 2.38E-7 | 6.89E-7       | > 1.00E-4 |      |
| HT29                           | 0.373     | 2.402                                 | 2.412 | 1.902 | 0.359 | 0.397 | 0.326 | 101            | 75   | -4   | 1    | -13            | 2.09E-7 | > 1.00E-4     | > 1.00E-4 |      |
| KM12                           | 0.833     | 3.303                                 | 3.313 | 3.301 | 1.164 | 1.125 | 0.796 | 100            | 100  | 13   | 12   | -4             | 3.77E-7 | 5.33E-5       | > 1.00E-4 |      |
| SW-620                         | 0.333     | 2.473                                 | 2.399 | 2.217 | 0.784 | 0.757 | 0.532 | 97             | 88   | 21   | 20   | 9              | 3.70E-7 | > 1.00E-4     | > 1.00E-4 |      |
| CNS Cancer                     |           |                                       |       |       |       |       |       |                |      |      |      |                |         |               |           |      |
| SF-268                         | 1.079     | 2.821                                 | 2.747 | 2.644 | 1.725 | 1.546 | 1.376 | 96             | 90   | 37   | 27   | 17             | 5.69E-7 | > 1.00E-4     | > 1.00E-4 |      |
| SF-295                         | 0.472     | 1.855                                 | 1.821 | 1.582 | 0.525 | 0.482 | 0.256 | 97             | 80   | 4    | 1    | -46            | 2.49E-7 | 1.04E-5       | > 1.00E-4 |      |
| SF-539                         | 0.563     | 1.803                                 | 1.766 | 1.061 | 0.373 | 0.394 | 0.195 | 97             | 40   | -34  | -30  | -65            | 6.70E-8 | 3.49E-7       | 3.65E-5   |      |
| SNB-19                         | 0.527     | 1.831                                 | 1.781 | 1.733 | 0.622 | 0.704 | 0.520 | 96             | 92   | 7    | 14   | -1             | 3.15E-7 | 8.15E-5       | > 1.00E-4 |      |
| SNB-75                         | 2.216     | 3.169                                 | 3.030 | 3.003 | 2.193 | 2.073 | 1.808 | 85             | 83   | -1   | -6   | -18            | 2.45E-7 | 9.71E-7       | > 1.00E-4 |      |
| U251                           | 0.581     | 2.702                                 | 2.664 | 2.561 | 0.693 | 0.647 | 0.476 | 98             | 93   | 5    | 3    | -18            | 3.11E-7 | 1.40E-5       | > 1.00E-4 |      |
| Melanoma                       |           |                                       |       |       |       |       |       |                |      |      |      |                |         |               |           |      |
| MALME-3M                       | 0.726     | 1.496                                 | 1.465 | 1.342 | 0.920 | 0.950 | 0.653 | 96             | 80   | 25   | 29   | -10            | 3.52E-7 | 5.53E-5       | > 1.00E-4 |      |
| M14                            | 0.470     | 1.952                                 | 1.891 | 1.772 | 0.720 | 0.814 | 0.690 | 96             | 88   | 17   | 23   | 15             | 3.41E-7 | > 1.00E-4     | > 1.00E-4 |      |
| MDA-MB-435                     | 0.779     | 3.105                                 | 3.073 | 2.597 | 0.349 | 0.411 | 0.335 | 99             | 78   | -55  | -47  | -57            | 1.63E-7 | 3.86E-7       |           |      |
| SK-MEL-2                       | 1.232     | 2.635                                 | 2.633 | 2.496 | 1.403 | 1.393 | 0.945 | 100            | 90   | 12   | 11   | -23            | 3.27E-7 | 2.14E-5       | > 1.00E-4 |      |
| SK-MEL-28                      | 0.523     | 1.655                                 | 1.684 | 1.328 | 0.945 | 0.809 | 0.528 | 103            | 71   | 37   | 25   | 0              | 4.20E-7 | > 1.00E-4     | > 1.00E-4 |      |
| SK-MEL-5                       | 0.640     | 2.672                                 | 2.694 | 2.555 | 0.493 | 0.501 | 0.250 | 101            | 94   | -23  | -22  | -61            | 2.38E-7 | 6.36E-7       | 5.26E-5   |      |
| UACC-257                       | 0.948     | 2.488                                 | 2.311 | 1.932 | 1.503 | 1.396 | 1.035 | 89             | 64   | 36   | 29   | 6              | 3.16E-7 | > 1.00E-4     | > 1.00E-4 |      |
| UACC-62                        | 0.837     | 2.767                                 | 2.653 | 2.270 | 1.072 | 1.025 | 0.670 | 94             | 74   | 12   | 10   | -20            | 2.46E-7 | 2.13E-5       | > 1.00E-4 |      |
| Ovarian Cancer                 |           |                                       |       |       |       |       |       |                |      |      |      |                |         |               |           |      |
| IGROV1                         | 0.501     | 2.086                                 | 2.087 | 1.924 | 0.657 | 0.603 | 0.365 | 100            | 90   | 10   | 6    | -27            | 3.14E-7 | 1.55E-5       | > 1.00E-4 |      |
| OVCAR-3                        | 1.057     | 2.747                                 | 2.774 | 2.618 | 1.395 | 1.212 | 0.870 | 102            | 92   | 20   | 9    | -18            | 3.85E-7 | 2.20E-5       | > 1.00E-4 |      |
| OVCAR-4                        | 0.841     | 1.961                                 | 1.909 | 1.624 | 1.261 | 1.165 | 0.800 | 95             | 70   | 37   | 29   | -5             | 4.10E-7 | 7.15E-5       | > 1.00E-4 |      |
| OVCAR-5                        | 0.567     | 1.731                                 | 1.670 | 1.588 | 0.771 | 0.724 | 0.575 | 95             | 88   | 17   | 13   | 1              | 3.44E-7 | > 1.00E-4     | > 1.00E-4 |      |
| OVCAR-8                        | 0.512     | 2.531                                 | 2.468 | 1.804 | 0.386 | 0.342 | 0.327 | 97             | 64   | -25  | -33  | -36            | 1.44E-7 | 5.27E-7       | > 1.00E-4 |      |
| NCI/ADR-RES                    | 0.370     | 1.281                                 | 1.250 | 0.770 | 0.585 | 0.573 | 0.453 | 97             | 44   | 24   | 22   | 9              | 7.68E-8 | > 1.00E-4     | > 1.00E-4 |      |
| SK-OV-3                        | 0.967     | 1.810                                 | 1.871 | 1.928 | 1.347 | 1.498 | 1.201 | 107            | 114  | 45   | 63   | 28             |         | > 1.00E-4     | > 1.00E-4 |      |
| Renal Cancer                   |           |                                       |       |       |       |       |       |                |      |      |      |                |         |               |           |      |
| 786-0                          | 0.578     | 2.410                                 | 2.352 | 2.252 | 0.951 | 0.925 | 0.722 | 97             | 91   | 20   | 19   | 8              | 3.82E-7 | > 1.00E-4     | > 1.00E-4 |      |
| A498                           | 1.326     | 2.033                                 | 2.088 | 1.963 | 1.938 | 1.810 | 1.430 | 108            | 90   | 87   | 68   | 15             | 2.20E-5 | > 1.00E-4     | > 1.00E-4 |      |
| ACHN                           | 0.286     | 1.184                                 | 1.161 | 0.870 | 0.461 | 0.372 | 0.266 | 97             | 65   | 19   | 10   | -7             | 2.13E-7 | 3.78E-5       | > 1.00E-4 |      |
| CAKI-1                         | 0.680     | 2.302                                 | 2.214 | 1.938 | 1.004 | 0.897 | 0.579 | 95             | 78   | 20   | 13   | -15            | 3.01E-7 | 2.98E-5       | > 1.00E-4 |      |
| RXF 393                        | 0.651     | 1.167                                 | 1.226 | 1.115 | 0.910 | 0.815 | 0.532 | 111            | 90   | 50   | 32   | -18            | 1.03E-6 | 4.31E-5       | > 1.00E-4 |      |
| SN12C                          | 0.520     | 1.772                                 | 1.810 | 1.509 | 0.635 | 0.533 | 0.425 | 103            | 79   | 9    | 1    | -18            | 2.60E-7 | 1.13E-5       | > 1.00E-4 |      |
| TK-10                          | 1.216     | 1.994                                 | 1.878 | 1.892 | 1.853 | 1.689 | 1.284 | 85             | 87   | 82   | 61   | 9              | 1.61E-5 | > 1.00E-4     | > 1.00E-4 |      |
| UO-31                          | 0.500     | 2.080                                 | 1.984 | 1.903 | 0.889 | 0.776 | 0.593 | 94             | 89   | 25   | 17   | 6              | 4.02E-7 | > 1.00E-4     | > 1.00E-4 |      |
| Prostate Cancer                |           |                                       |       |       |       |       |       |                |      |      |      |                |         |               |           |      |
| PC-3                           | 0.628     | 2.131                                 | 2.133 | 2.059 | 0.856 | 0.743 | 0.629 | 100            | 95   | 15   | 8    | 0              | 3.67E-7 | > 1.00E-4     | > 1.00E-4 |      |
| DU-145                         | 0.333     | 1.648                                 | 1.706 | 1.512 | 0.469 | 0.434 | 0.289 | 104            | 90   | 10   | 8    | -13            | 3.16E-7 | 2.32E-5       | > 1.00E-4 |      |
| Breast Cancer                  |           |                                       |       |       |       |       |       |                |      |      |      |                |         |               |           |      |
| MCF7                           | 0.186     | 0.915                                 | 0.836 | 0.702 | 0.194 | 0.157 | 0.094 | 89             | 71   | 1    | -16  | -49            | 1.99E-7 | 1.16E-6       | > 1.00E-4 |      |
| MDA-MB-231/ATCC                | 0.554     | 1.342                                 | 1.319 | 1.237 | 0.438 | 0.502 | 0.415 | 93             | 87   | -21  | -9   | -25            | 2.19E-7 | 6.38E-7       | > 1.00E-4 |      |
| HS 578T                        | 1.525     | 2.677                                 | 2.602 | 2.493 | 2.019 | 1.815 | 1.489 | 93             | 84   | 43   | 25   | -2             | 6.72E-7 | 8.19E-5       | > 1.00E-4 |      |
| BT-549                         | 1.016     | 2.120                                 | 2.124 | 2.076 | 0.737 | 0.732 | 0.722 | 100            | 96   | -27  | -28  | -29            | 2.36E-7 | 5.99E-7       | > 1.00E-4 |      |
| T-47D                          | 1.368     | 3.127                                 | 3.027 | 3.007 | 2.622 | 2.117 | 1.645 | 94             | 93   | 71   | 43   | 16             | 5.51E-6 | > 1.00E-4     | > 1.00E-4 |      |
| MDA-MB-468                     | 0.702     | 1.356                                 | 1.323 | 1.248 | 0.823 | 0.766 | 0.597 | 95             | 83   | 19   | 10   | -15            | 3.27E-7 | 2.48E-5       | > 1.00E-4 |      |

# Compound 6d

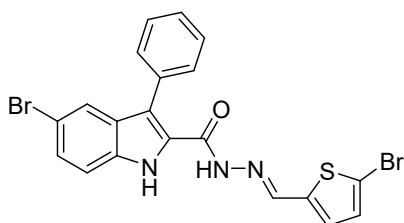

National Cancer Institute Developmental Therapeutics Program  
Dose Response Curves

NSC: D - 832476 / 1  
Report Date: January 25, 2022

SSPL: 1BCH  
EXP. ID: 2111NS16  
Test Date: November 29, 2021

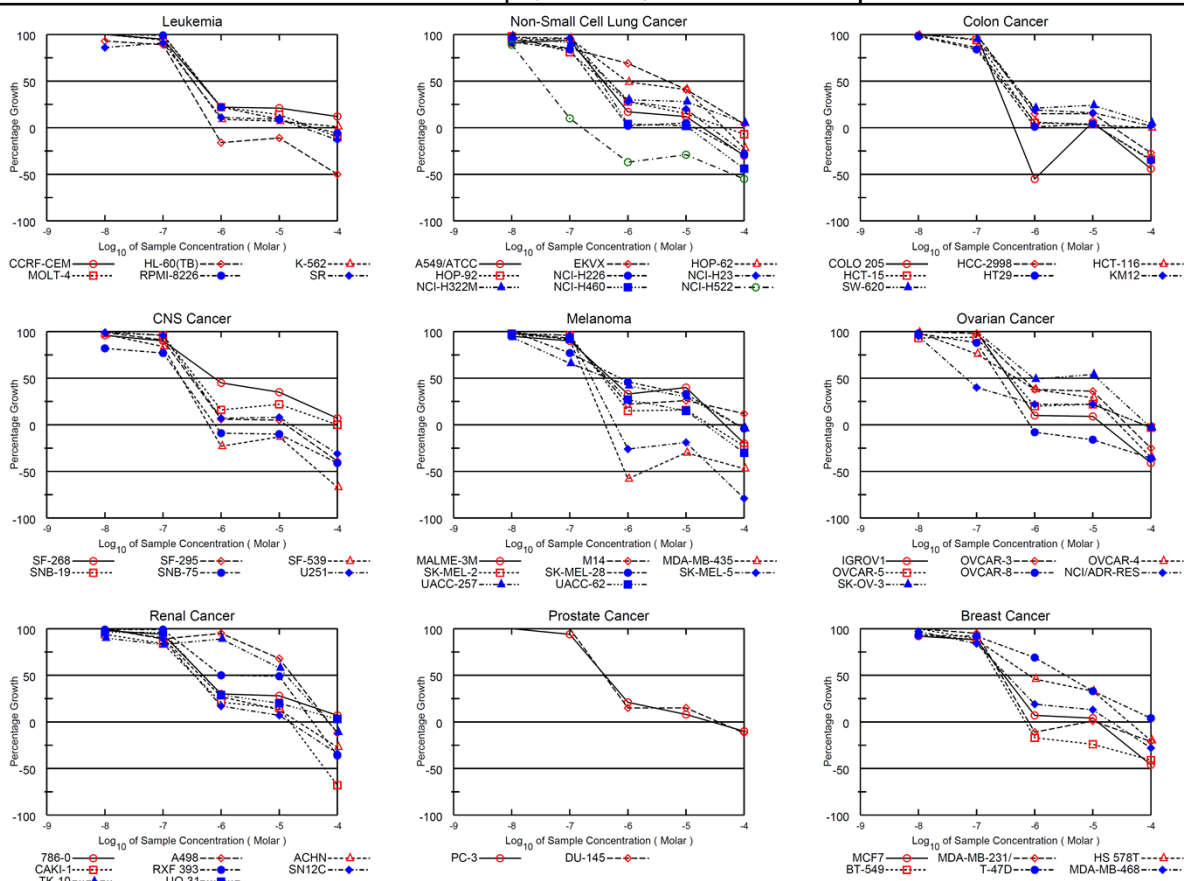

## National Cancer Institute Developmental Therapeutics Program In-Vitro Testing Results

| NSC : D - 832476 / 1           |           | Experiment ID : 2111NS16              |       |       |       |       | Test Type : 08 |      |      |      |      | Units : Molar |         |           |           |
|--------------------------------|-----------|---------------------------------------|-------|-------|-------|-------|----------------|------|------|------|------|---------------|---------|-----------|-----------|
| Report Date : January 25, 2022 |           | Test Date : November 29, 2021         |       |       |       |       | QNS :          |      |      |      |      | MC :          |         |           |           |
| COMI : TO3                     |           | Stain Reagent : SRB Dual-Pass Related |       |       |       |       | SSPL : 1BCH    |      |      |      |      |               |         |           |           |
| Panel/Cell Line                | Time Zero | Log10 Concentration                   |       |       |       |       |                |      |      |      |      | GI50          | TGI     | LC50      |           |
|                                |           | Ctrl                                  | -8.0  | -7.0  | -6.0  | -5.0  | -4.0           | -8.0 | -7.0 | -6.0 | -5.0 |               |         |           | -4.0      |
| Leukemia                       |           |                                       |       |       |       |       |                |      |      |      |      |               |         |           |           |
| CCRF-CEM                       | 0.530     | 2.665                                 | 2.663 | 2.563 | 0.992 | 0.978 | 0.785          | 100  | 95   | 22   | 21   | 12            | 4.12E-7 | > 1.00E-4 | > 1.00E-4 |
| HL-60(TB)                      | 0.572     | 2.569                                 | 2.428 | 2.340 | 0.483 | 0.508 | 0.285          | 93   | 89   | -16  | -11  | -50           | 2.34E-7 | 7.08E-7   | 9.85E-5   |
| K-562                          | 0.154     | 1.747                                 | 1.776 | 1.655 | 0.298 | 0.273 | 0.173          | 102  | 94   | 9    | 7    | 1             | 3.30E-7 | > 1.00E-4 | > 1.00E-4 |
| MOLT-4                         | 0.590     | 2.391                                 | 2.431 | 2.393 | 0.988 | 0.842 | 0.532          | 102  | 100  | 22   | 14   | -10           | 4.39E-7 | 3.85E-5   | > 1.00E-4 |
| RPMI-8226                      | 0.581     | 2.656                                 | 2.676 | 2.639 | 1.037 | 0.773 | 0.544          | 101  | 99   | 22   | 9    | -6            | 4.33E-7 | 3.91E-5   | > 1.00E-4 |
| SR                             | 0.371     | 1.711                                 | 1.519 | 1.588 | 0.524 | 0.487 | 0.323          | 86   | 91   | 11   | 9    | -13           | 3.27E-7 | 2.51E-5   | > 1.00E-4 |
| Non-Small Cell Lung Cancer     |           |                                       |       |       |       |       |                |      |      |      |      |               |         |           |           |
| A549/ATCC                      | 0.337     | 2.057                                 | 1.905 | 1.961 | 0.621 | 0.545 | 0.236          | 91   | 94   | 17   | 12   | -30           | 3.72E-7 | 1.93E-5   | > 1.00E-4 |
| EKVX                           | 1.027     | 1.899                                 | 1.854 | 1.767 | 1.626 | 1.388 | 1.063          | 95   | 85   | 69   | 41   | 4             | 4.83E-6 | > 1.00E-4 | > 1.00E-4 |
| HOP-62                         | 0.707     | 1.861                                 | 1.781 | 1.813 | 1.277 | 1.175 | 0.553          | 93   | 96   | 49   | 41   | -22           | 9.69E-7 | 4.47E-5   | > 1.00E-4 |
| HOP-92                         | 1.244     | 2.003                                 | 1.989 | 1.862 | 1.453 | 1.361 | 1.154          | 98   | 81   | 28   | 15   | -7            | 3.83E-7 | 4.78E-5   | > 1.00E-4 |
| NCI-H226                       | 0.822     | 1.484                                 | 1.430 | 1.377 | 0.837 | 0.852 | 0.588          | 92   | 84   | 2    | 5    | -29           | 2.59E-7 | 1.37E-5   | > 1.00E-4 |
| NCI-H23                        | 0.419     | 1.409                                 | 1.384 | 1.374 | 0.696 | 0.616 | 0.307          | 97   | 96   | 28   | 20   | -27           | 4.77E-7 | 2.67E-5   | > 1.00E-4 |
| NCI-H322M                      | 0.810     | 2.031                                 | 2.013 | 1.924 | 1.182 | 1.147 | 0.876          | 98   | 91   | 30   | 28   | 5             | 4.77E-7 | > 1.00E-4 | > 1.00E-4 |
| NCI-H460                       | 0.323     | 2.981                                 | 3.073 | 3.032 | 0.425 | 0.387 | 0.182          | 103  | 102  | 4    | 2    | -44           | 3.38E-7 | 1.13E-5   | > 1.00E-4 |
| NCI-H522                       | 1.038     | 2.415                                 | 2.266 | 1.176 | 0.650 | 0.740 | 0.467          | 89   | 10   | -37  | -29  | -55           | 3.12E-8 | 1.62E-7   | 6.45E-5   |
| Colon Cancer                   |           |                                       |       |       |       |       |                |      |      |      |      |               |         |           |           |
| COLO 205                       | 0.628     | 2.581                                 | 2.557 | 2.718 | 0.280 | 0.736 | 0.351          | 99   | 107  | -55  | 6    | -44           | 2.24E-7 |           |           |
| HCC-2998                       | 0.495     | 1.572                                 | 1.563 | 1.617 | 0.655 | 0.652 | 0.363          | 99   | 104  | 15   | 15   | -27           | 4.04E-7 | 2.25E-5   | > 1.00E-4 |
| HCT-116                        | 0.226     | 2.512                                 | 2.498 | 2.196 | 0.362 | 0.294 | 0.233          | 99   | 86   | 6    | 3    | 0             | 2.82E-7 | > 1.00E-4 | > 1.00E-4 |
| HCT-15                         | 0.217     | 1.407                                 | 1.402 | 1.332 | 0.272 | 0.271 | 0.143          | 100  | 94   | 5    | 4    | -34           | 3.10E-7 | 1.31E-5   | > 1.00E-4 |
| HT29                           | 0.373     | 2.425                                 | 2.380 | 2.098 | 0.402 | 0.460 | 0.243          | 98   | 84   | 1    | 4    | -35           | 2.58E-7 | 1.28E-5   | > 1.00E-4 |
| KM12                           | 0.833     | 3.358                                 | 3.346 | 3.369 | 1.313 | 1.236 | 0.892          | 100  | 100  | 19   | 16   | 2             | 4.16E-7 | > 1.00E-4 | > 1.00E-4 |
| SW-620                         | 0.333     | 2.474                                 | 2.467 | 2.375 | 0.792 | 0.850 | 0.437          | 100  | 95   | 21   | 24   | 5             | 4.11E-7 | > 1.00E-4 | > 1.00E-4 |
| CNS Cancer                     |           |                                       |       |       |       |       |                |      |      |      |      |               |         |           |           |
| SF-268                         | 1.079     | 2.928                                 | 2.858 | 2.745 | 1.915 | 1.726 | 1.210          | 96   | 90   | 45   | 35   | 7             | 7.82E-7 | > 1.00E-4 | > 1.00E-4 |
| SF-295                         | 0.472     | 1.839                                 | 1.820 | 1.722 | 0.556 | 0.534 | 0.290          | 99   | 91   | 6    | 5    | -39           | 3.06E-7 | 1.27E-5   | > 1.00E-4 |
| SF-539                         | 0.563     | 1.841                                 | 1.802 | 1.642 | 0.431 | 0.492 | 0.184          | 97   | 84   | -23  | -13  | -67           | 2.09E-7 | 6.06E-7   | 4.82E-5   |
| SNB-19                         | 0.527     | 1.876                                 | 1.880 | 1.818 | 0.749 | 0.821 | 0.523          | 100  | 96   | 16   | 22   | 0             | 3.77E-7 | 9.17E-5   | > 1.00E-4 |
| SNB-75                         | 2.216     | 3.125                                 | 2.961 | 2.918 | 2.028 | 1.989 | 1.303          | 82   | 77   | -9   | -10  | -41           | 2.08E-7 | 7.96E-7   | > 1.00E-4 |
| U251                           | 0.581     | 2.759                                 | 2.730 | 2.678 | 0.744 | 0.753 | 0.399          | 99   | 96   | 7    | 8    | -31           | 3.32E-7 | 1.59E-5   | > 1.00E-4 |
| Melanoma                       |           |                                       |       |       |       |       |                |      |      |      |      |               |         |           |           |
| MALME-3M                       | 0.726     | 1.503                                 | 1.468 | 1.425 | 0.980 | 1.040 | 0.580          | 95   | 90   | 33   | 40   | -20           | 4.98E-7 | 4.64E-5   | > 1.00E-4 |
| M14                            | 0.470     | 2.111                                 | 2.073 | 1.992 | 0.839 | 0.900 | 0.666          | 98   | 93   | 22   | 26   | 12            | 4.05E-7 | > 1.00E-4 | > 1.00E-4 |
| MDA-MB-435                     | 0.779     | 3.069                                 | 3.063 | 2.856 | 0.328 | 0.545 | 0.409          | 100  | 91   | -58  | -30  | -47           | 1.88E-7 | 4.08E-7   |           |
| SK-MEL-2                       | 1.232     | 2.623                                 | 2.601 | 2.572 | 1.442 | 1.449 | 0.950          | 98   | 96   | 15   | 16   | -23           | 3.72E-7 | 2.54E-5   | > 1.00E-4 |
| SK-MEL-28                      | 0.523     | 1.735                                 | 1.733 | 1.451 | 1.078 | 0.920 | 0.502          | 100  | 77   | 46   | 33   | -4            | 7.31E-7 | 7.74E-5   | > 1.00E-4 |
| SK-MEL-5                       | 0.640     | 2.714                                 | 2.675 | 2.639 | 0.472 | 0.517 | 0.135          | 98   | 96   | -26  | -19  | -79           | 2.39E-7 | 6.11E-7   | 3.28E-5   |
| UACC-257                       | 0.948     | 2.541                                 | 2.447 | 1.993 | 1.610 | 1.425 | 0.914          | 94   | 66   | 42   | 30   | -4            | 4.45E-7 | 7.79E-5   | > 1.00E-4 |
| UACC-62                        | 0.837     | 2.882                                 | 2.820 | 2.712 | 1.386 | 1.141 | 0.582          | 97   | 92   | 27   | 15   | -30           | 4.39E-7 | 2.13E-5   | > 1.00E-4 |
| Ovarian Cancer                 |           |                                       |       |       |       |       |                |      |      |      |      |               |         |           |           |
| IGROV1                         | 0.501     | 2.168                                 | 2.216 | 2.178 | 0.674 | 0.657 | 0.295          | 103  | 101  | 10   | 9    | -41           | 3.63E-7 | 1.53E-5   | > 1.00E-4 |
| OVCAR-3                        | 1.057     | 2.887                                 | 2.916 | 2.847 | 1.760 | 1.707 | 0.790          | 102  | 98   | 38   | 36   | -25           | 6.38E-7 | 3.84E-5   | > 1.00E-4 |
| OVCAR-4                        | 0.841     | 1.929                                 | 1.915 | 1.668 | 1.255 | 1.152 | 0.546          | 99   | 76   | 38   | 29   | -35           | 4.84E-7 | 2.81E-5   | > 1.00E-4 |
| OVCAR-5                        | 0.567     | 1.795                                 | 1.707 | 1.723 | 0.817 | 0.843 | 0.548          | 93   | 94   | 20   | 22   | -3            | 3.96E-7 | 7.42E-5   | > 1.00E-4 |
| OVCAR-8                        | 0.512     | 2.597                                 | 2.549 | 2.342 | 0.470 | 0.432 | 0.329          | 98   | 88   | -8   | -16  | -36           | 2.47E-7 | 8.20E-7   | > 1.00E-4 |
| NCI/ADR-RES                    | 0.370     | 1.334                                 | 1.290 | 0.751 | 0.586 | 0.582 | 0.360          | 95   | 40   | 22   | 22   | -3            | 6.50E-8 | 7.69E-5   | > 1.00E-4 |
| SK-OV-3                        | 0.967     | 1.814                                 | 1.861 | 1.895 | 1.382 | 1.429 | 0.937          | 105  | 109  | 49   | 54   | -3            |         | 8.83E-5   | > 1.00E-4 |
| Renal Cancer                   |           |                                       |       |       |       |       |                |      |      |      |      |               |         |           |           |
| 786-0                          | 0.578     | 2.526                                 | 2.487 | 2.401 | 1.170 | 1.119 | 0.711          | 98   | 94   | 30   | 28   | 7             | 4.89E-7 | > 1.00E-4 | > 1.00E-4 |
| A498                           | 1.326     | 2.058                                 | 2.070 | 1.975 | 2.022 | 1.822 | 1.168          | 102  | 89   | 95   | 68   | -12           | 1.67E-5 | 7.08E-5   | > 1.00E-4 |
| ACHN                           | 0.286     | 1.214                                 | 1.233 | 1.120 | 0.540 | 0.403 | 0.208          | 102  | 90   | 27   | 13   | -27           | 4.34E-7 | 2.07E-5   | > 1.00E-4 |
| CAKI-1                         | 0.680     | 2.232                                 | 2.142 | 1.984 | 1.004 | 0.917 | 0.218          | 94   | 84   | 21   | 15   | -68           | 3.46E-7 | 1.52E-5   | 6.09E-5   |
| RXF 393                        | 0.651     | 1.199                                 | 1.197 | 1.193 | 0.926 | 0.918 | 0.414          | 99   | 99   | 50   | 49   | -36           | 1.27E-6 | 3.73E-5   | > 1.00E-4 |
| SN12C                          | 0.520     | 2.052                                 | 2.062 | 1.880 | 0.780 | 0.623 | 0.342          | 101  | 89   | 17   | 7    | -34           | 3.46E-7 | 1.46E-5   | > 1.00E-4 |
| TK-10                          | 1.216     | 2.054                                 | 1.971 | 1.909 | 1.961 | 1.698 | 1.079          | 90   | 83   | 89   | 58   | -11           | 1.29E-5 | 6.85E-5   | > 1.00E-4 |
| UO-31                          | 0.500     | 2.114                                 | 2.057 | 2.042 | 0.964 | 0.823 | 0.547          | 96   | 96   | 29   | 20   | 3             | 4.80E-7 | > 1.00E-4 | > 1.00E-4 |
| Prostate Cancer                |           |                                       |       |       |       |       |                |      |      |      |      |               |         |           |           |
| PC-3                           | 0.628     | 2.262                                 | 2.267 | 2.164 | 0.967 | 0.753 | 0.567          | 100  | 94   | 21   | 8    | -10           | 3.99E-7 | 2.74E-5   | > 1.00E-4 |
| DU-145                         | 0.333     | 1.680                                 | 1.807 | 1.747 | 0.538 | 0.541 | 0.292          | 109  | 105  | 15   | 15   | -12           | 4.10E-7 | 3.57E-5   | > 1.00E-4 |
| Breast Cancer                  |           |                                       |       |       |       |       |                |      |      |      |      |               |         |           |           |
| MCF7                           | 0.186     | 0.934                                 | 0.876 | 0.848 | 0.236 | 0.214 | 0.101          | 92   | 88   | 7    | 4    | -46           | 2.95E-7 | 1.19E-5   | > 1.00E-4 |
| MDA-MB-231/ATCC                | 0.554     | 1.439                                 | 1.447 | 1.392 | 0.495 | 0.564 | 0.439          | 101  | 95   | -11  | 1    | -21           | 2.66E-7 |           | > 1.00E-4 |
| HS 578T                        | 1.525     | 2.893                                 | 2.618 | 2.548 | 2.059 | 1.916 | 1.216          | 94   | 88   | 46   | 33   | -20           | 7.91E-7 | 4.19E-5   | > 1.00E-4 |
| BT-549                         | 1.016     | 2.141                                 | 2.143 | 2.015 | 0.848 | 0.777 | 0.597          | 100  | 89   | -17  | -24  | -41           | 2.33E-7 | 6.97E-7   | > 1.00E-4 |
| T-47D                          | 1.368     | 3.156                                 | 3.028 | 3.010 | 2.608 | 1.963 | 1.443          | 93   | 92   | 69   | 33   | 4             | 3.44E-6 | > 1.00E-4 | > 1.00E-4 |
| MDA-MB-468                     | 0.702     | 1.375                                 | 1.356 | 1.271 | 0.827 | 0.791 | 0.505          | 97   | 84   | 19   | 13   | -28           | 3.34E-7 | 2.09E-5   | > 1.00E-4 |

# Compound 6e

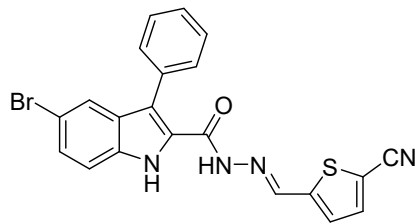

National Cancer Institute Developmental Therapeutics Program  
Dose Response Curves

NSC: D - 832477 / 1  
Report Date: January 25, 2022

SSPL: 1BCH | EXP. ID: 2111NS16  
Test Date: November 29, 2021

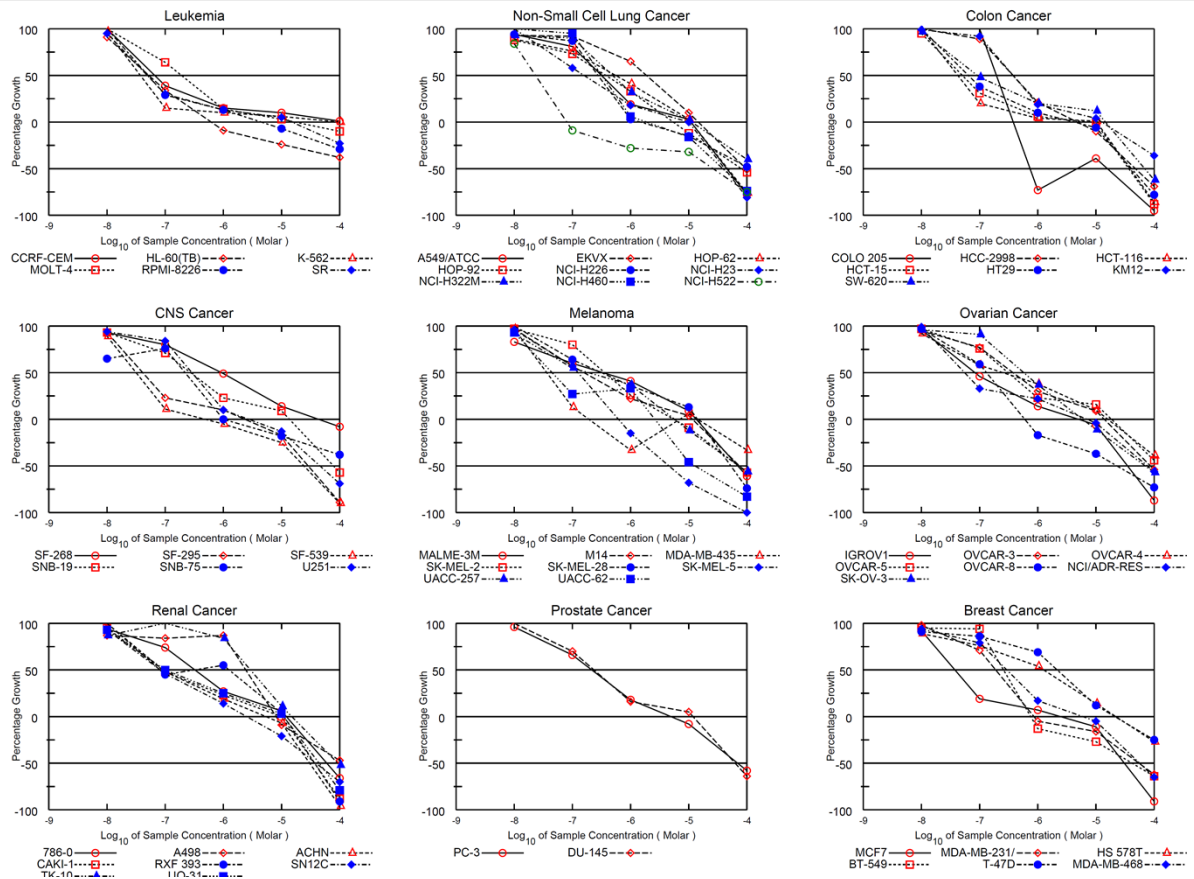



National Cancer Institute Developmental Therapeutics Program  
In-Vitro Testing Results

| NSC : D - 832477 / 1              |           | Experiment ID : 2111NS16              |       |       |       |       |        |      |      |      |      | Test Type : 08 |         | Units : Molar |           |  |
|-----------------------------------|-----------|---------------------------------------|-------|-------|-------|-------|--------|------|------|------|------|----------------|---------|---------------|-----------|--|
| Report Date : January 25, 2022    |           | Test Date : November 29, 2021         |       |       |       |       |        |      |      |      |      | QNS :          |         | MC :          |           |  |
| COMI : TO4                        |           | Stain Reagent : SRB Dual-Pass Related |       |       |       |       |        |      |      |      |      | SSPL : 1BCH    |         |               |           |  |
| Panel/Cell Line                   | Time Zero | Log10 Concentration                   |       |       |       |       |        |      |      |      |      | GI50           | TGI     | LC50          |           |  |
|                                   |           | Ctrl                                  | -8.0  | -7.0  | -6.0  | -5.0  | -4.0   | -8.0 | -7.0 | -6.0 | -5.0 |                |         |               | -4.0      |  |
| <b>Leukemia</b>                   |           |                                       |       |       |       |       |        |      |      |      |      |                |         |               |           |  |
| CCRF-CEM                          | 0.530     | 2.745                                 | 2.738 | 1.396 | 0.865 | 0.747 | 0.562  | 100  | 39   | 15   | 10   | 1              | 6.60E-8 | > 1.00E-4     | > 1.00E-4 |  |
| HL-60(TB)                         | 0.572     | 2.714                                 | 2.527 | 1.305 | 0.520 | 0.434 | 0.358  | 91   | 34   | -9   | -24  | -38            | 5.29E-8 | 6.17E-7       | > 1.00E-4 |  |
| K-562                             | 0.154     | 1.827                                 | 1.785 | 0.401 | 0.320 | 0.251 | 0.159  | 97   | 15   | 10   | 6    | 0              | 3.75E-8 | > 1.00E-4     | > 1.00E-4 |  |
| MOLT-4                            | 0.590     | 2.547                                 | 2.573 | 1.843 | 0.860 | 0.652 | 0.534  | 101  | 64   | 14   | 3    | -10            | 1.90E-7 | 1.77E-5       | > 1.00E-4 |  |
| RPMI-8226                         | 0.581     | 2.611                                 | 2.654 | 1.170 | 0.843 | 0.539 | 0.410  | 102  | 29   | 13   | -7   | -29            | 5.16E-8 | 4.35E-6       | > 1.00E-4 |  |
| SR                                | 0.371     | 1.871                                 | 1.797 | 0.827 | 0.559 | 0.445 | 0.287  | 95   | 30   | 13   | 5    | -23            | 4.98E-8 | 1.51E-5       | > 1.00E-4 |  |
| <b>Non-Small Cell Lung Cancer</b> |           |                                       |       |       |       |       |        |      |      |      |      |                |         |               |           |  |
| A549/ATCC                         | 0.337     | 2.048                                 | 1.938 | 1.724 | 0.663 | 0.393 | 0.073  | 94   | 81   | 19   | 3    | -78            | 3.17E-7 | 1.10E-5       | 4.49E-5   |  |
| EKVX                              | 1.027     | 1.947                                 | 1.878 | 1.876 | 1.627 | 1.119 | 0.501  | 93   | 92   | 65   | 10   | -51            | 1.88E-6 | 1.45E-5       | 9.53E-5   |  |
| HOP-62                            | 0.707     | 1.884                                 | 1.759 | 1.605 | 1.191 | 0.745 | 0.172  | 89   | 76   | 41   | 3    | -76            | 5.58E-7 | 1.10E-5       | 4.72E-5   |  |
| HOP-92                            | 1.244     | 1.989                                 | 1.898 | 1.789 | 1.494 | 1.096 | 0.578  | 88   | 73   | 33   | -12  | -54            | 3.83E-7 | 5.47E-6       | 8.22E-5   |  |
| NCI-H226                          | 0.822     | 1.486                                 | 1.443 | 1.401 | 0.845 | 0.700 | 0.432  | 94   | 87   | 3    | -15  | -48            | 2.78E-7 | 1.53E-6       | > 1.00E-4 |  |
| NCI-H23                           | 0.419     | 1.346                                 | 1.353 | 0.961 | 0.582 | 0.423 | 0.079  | 101  | 58   | 18   | 0    | -81            | 1.61E-7 | 1.01E-5       | 4.14E-5   |  |
| NCI-H322M                         | 0.373     | 2.085                                 | 1.991 | 1.958 | 1.223 | 0.837 | 0.489  | 93   | 90   | 32   | 2    | -40            | 4.95E-7 | 1.12E-5       | > 1.00E-4 |  |
| NCI-H460                          | 0.323     | 3.049                                 | 3.049 | 2.910 | 0.481 | 0.271 | 0.085  | 100  | 95   | 6    | -16  | -74            | 3.19E-7 | 1.84E-6       | 3.86E-5   |  |
| NCI-H522                          | 1.038     | 2.400                                 | 2.177 | 0.941 | 0.744 | 0.708 | 0.264  | 84   | -9   | -28  | -32  | -75            | 2.30E-8 | 7.93E-8       | 2.66E-5   |  |
| <b>Colon Cancer</b>               |           |                                       |       |       |       |       |        |      |      |      |      |                |         |               |           |  |
| COLO 205                          | 0.628     | 2.492                                 | 2.580 | 2.494 | 0.172 | 0.382 | 0.033  | 105  | 100  | -73  | -39  | -95            | 1.95E-7 | 3.80E-7       | .         |  |
| HCC-2998                          | 0.495     | 1.553                                 | 1.590 | 1.441 | 0.720 | 0.447 | 0.155  | 104  | 89   | 21   | -10  | -69            | 3.78E-7 | 4.83E-6       | 4.80E-5   |  |
| HCT-116                           | 0.226     | 2.512                                 | 2.536 | 0.672 | 0.321 | 0.257 | 0.032  | 101  | 20   | 4    | 1    | -86            | 4.23E-8 | 1.04E-5       | 3.88E-5   |  |
| HCT-15                            | 0.217     | 1.485                                 | 1.418 | 0.605 | 0.288 | 0.215 | 0.027  | 95   | 31   | 6    | -1   | -88            | 4.97E-8 | 6.73E-6       | 3.66E-5   |  |
| HT29                              | 0.373     | 2.406                                 | 2.405 | 1.155 | 0.576 | 0.352 | 0.083  | 100  | 38   | 10   | -6   | -78            | 6.48E-8 | 4.36E-6       | 4.11E-5   |  |
| KM12                              | 0.833     | 3.378                                 | 3.363 | 3.168 | 1.325 | 0.939 | 0.535  | 99   | 92   | 19   | 4    | -36            | 3.77E-7 | 1.27E-5       | > 1.00E-4 |  |
| SW-620                            | 0.333     | 2.526                                 | 2.449 | 1.378 | 0.773 | 0.591 | 0.127  | 97   | 48   | 20   | 12   | -62            | 8.96E-8 | 1.44E-5       | 6.87E-5   |  |
| <b>CNS Cancer</b>                 |           |                                       |       |       |       |       |        |      |      |      |      |                |         |               |           |  |
| SF-268                            | 1.079     | 2.945                                 | 2.807 | 2.573 | 1.987 | 1.340 | 0.989  | 93   | 80   | 49   | 14   | -8             | 9.07E-7 | 4.21E-5       | > 1.00E-4 |  |
| SF-295                            | 0.472     | 1.993                                 | 1.890 | 0.825 | 0.623 | 0.392 | 0.051  | 93   | 23   | 10   | -17  | -89            | 4.14E-8 | 2.33E-6       | 2.86E-5   |  |
| SF-539                            | 0.563     | 1.927                                 | 1.784 | 0.720 | 0.534 | 0.423 | 0.054  | 89   | 11   | -5   | -25  | -90            | 3.21E-8 | 4.90E-7       | 2.41E-5   |  |
| SNB-19                            | 0.527     | 1.904                                 | 1.808 | 1.507 | 0.843 | 0.651 | 0.225  | 93   | 71   | 23   | 9    | -57            | 2.75E-7 | 1.37E-5       | 7.76E-5   |  |
| SNB-75                            | 2.216     | 3.116                                 | 2.805 | 2.901 | 2.209 | 1.820 | 1.373  | 65   | 76   | 0    | -18  | -38            | 2.19E-7 | 9.90E-7       | > 1.00E-4 |  |
| U251                              | 0.581     | 2.791                                 | 2.662 | 2.442 | 0.811 | 0.506 | 0.179  | 94   | 84   | 10   | -13  | -69            | 2.91E-7 | 2.78E-6       | 4.56E-5   |  |
| <b>Melanoma</b>                   |           |                                       |       |       |       |       |        |      |      |      |      |                |         |               |           |  |
| MALME-3M                          | 0.726     | 1.561                                 | 1.418 | 1.227 | 1.067 | 0.804 | 0.287  | 83   | 60   | 41   | 9    | -61            | 3.33E-7 | 1.36E-5       | 7.06E-5   |  |
| M14                               | 0.470     | 2.096                                 | 2.040 | 1.400 | 0.835 | 0.534 | 0.200  | 97   | 57   | 22   | 4    | -58            | 1.61E-7 | 1.16E-5       | 7.54E-5   |  |
| MDA-MB-435                        | 0.779     | 3.129                                 | 3.060 | 1.075 | 0.523 | 0.914 | 0.525  | 97   | 13   | -33  | 6    | -33            | 3.60E-8 | .             | > 1.00E-4 |  |
| SK-MEL-2                          | 1.232     | 2.632                                 | 2.589 | 2.346 | 1.594 | 1.118 | 0.530  | 97   | 80   | 26   | -9   | -57            | 3.55E-7 | 5.45E-6       | 7.14E-5   |  |
| SK-MEL-28                         | 0.523     | 1.765                                 | 1.798 | 1.324 | 0.966 | 0.681 | 0.136  | 103  | 64   | 36   | 13   | -74            | 3.18E-7 | 1.40E-5       | 5.28E-5   |  |
| SK-MEL-5                          | 0.640     | 2.710                                 | 2.618 | 1.815 | 0.544 | 0.207 | -0.005 | 96   | 57   | -15  | -68  | -100           | 1.24E-7 | 6.18E-7       | 4.61E-6   |  |
| UACC-257                          | 0.948     | 2.554                                 | 2.430 | 1.828 | 1.544 | 0.834 | 0.418  | 92   | 55   | 37   | -12  | -56            | 1.87E-7 | 5.68E-6       | 7.31E-5   |  |
| UACC-62                           | 0.837     | 2.910                                 | 2.769 | 1.401 | 1.514 | 0.448 | 0.143  | 93   | 27   | 33   | -46  | -83            | 4.51E-8 | 2.59E-6       | 1.25E-5   |  |
| <b>Ovarian Cancer</b>             |           |                                       |       |       |       |       |        |      |      |      |      |                |         |               |           |  |
| IGROV1                            | 0.501     | 2.240                                 | 2.168 | 1.305 | 0.748 | 0.469 | 0.067  | 96   | 46   | 14   | -6   | -87            | 8.40E-8 | 4.86E-6       | 3.49E-5   |  |
| OVCAR-3                           | 1.057     | 2.855                                 | 2.773 | 2.439 | 1.599 | 1.218 | 0.489  | 95   | 77   | 30   | 9    | -54            | 3.76E-7 | 1.39E-5       | 8.70E-5   |  |
| OVCAR-4                           | 0.841     | 1.989                                 | 1.895 | 1.506 | 1.282 | 0.960 | 0.515  | 92   | 58   | 38   | 10   | -39            | 2.53E-7 | 1.62E-5       | > 1.00E-4 |  |
| OVCAR-5                           | 0.567     | 1.826                                 | 1.795 | 1.523 | 0.851 | 0.765 | 0.320  | 97   | 76   | 23   | 16   | -44            | 3.06E-7 | 1.84E-5       | > 1.00E-4 |  |
| OVCAR-8                           | 0.512     | 2.614                                 | 2.544 | 1.744 | 0.423 | 0.322 | 0.136  | 97   | 59   | -17  | -37  | -73            | 1.30E-7 | 5.89E-7       | 2.25E-5   |  |
| NCI/ADR-RES                       | 0.370     | 1.338                                 | 1.325 | 0.692 | 0.583 | 0.355 | 0.163  | 99   | 33   | 22   | -4   | -56            | 5.54E-8 | 6.92E-6       | 7.68E-5   |  |
| SK-OV-3                           | 0.967     | 1.800                                 | 1.768 | 1.728 | 1.278 | 0.863 | 0.413  | 96   | 91   | 37   | -11  | -57            | 5.83E-7 | 5.98E-6       | 6.97E-5   |  |
| <b>Renal Cancer</b>               |           |                                       |       |       |       |       |        |      |      |      |      |                |         |               |           |  |
| 786-0                             | 0.578     | 2.492                                 | 2.382 | 1.990 | 1.092 | 0.689 | 0.198  | 94   | 74   | 27   | 6    | -66            | 3.21E-7 | 1.20E-5       | 6.02E-5   |  |
| A498                              | 1.326     | 2.133                                 | 2.028 | 2.005 | 2.029 | 1.206 | 0.704  | 87   | 84   | 87   | -9   | -47            | 2.43E-6 | 8.05E-6       | > 1.00E-4 |  |
| ACHN                              | 0.286     | 1.240                                 | 1.238 | 0.747 | 0.464 | 0.267 | 0.011  | 100  | 48   | 19   | -7   | -96            | 9.25E-8 | 5.39E-6       | 3.04E-5   |  |
| CAKI-1                            | 0.680     | 2.290                                 | 2.214 | 1.452 | 1.047 | 0.679 | 0.080  | 95   | 48   | 23   | 0    | -88            | 9.04E-8 | 9.85E-6       | 3.68E-5   |  |
| RXF 393                           | 0.651     | 1.203                                 | 1.207 | 0.899 | 0.956 | 0.672 | 0.057  | 101  | 45   | 55   | 4    | -91            | .       | 1.09E-5       | 3.67E-5   |  |
| SN12C                             | 0.520     | 2.030                                 | 1.921 | 1.219 | 0.730 | 0.409 | 0.158  | 93   | 46   | 14   | -21  | -70            | 8.32E-8 | 2.47E-6       | 3.92E-5   |  |
| TK-10                             | 1.216     | 2.105                                 | 1.992 | 2.118 | 1.967 | 1.311 | 0.589  | 87   | 101  | 84   | 11   | -52            | 2.93E-6 | 1.48E-5       | 9.44E-5   |  |
| UO-31                             | 0.500     | 2.239                                 | 2.110 | 1.365 | 0.927 | 0.557 | 0.105  | 93   | 50   | 25   | 3    | -79            | 9.86E-8 | 1.10E-5       | 4.44E-5   |  |
| <b>Prostate Cancer</b>            |           |                                       |       |       |       |       |        |      |      |      |      |                |         |               |           |  |
| PC-3                              | 0.628     | 2.254                                 | 2.193 | 1.700 | 0.915 | 0.576 | 0.264  | 96   | 66   | 18   | -8   | -58            | 2.13E-7 | 4.79E-6       | 6.89E-5   |  |
| DU-145                            | 0.333     | 1.692                                 | 1.709 | 1.285 | 0.552 | 0.398 | 0.121  | 101  | 70   | 16   | 5    | -64            | 2.35E-7 | 1.17E-5       | 6.29E-5   |  |
| <b>Breast Cancer</b>              |           |                                       |       |       |       |       |        |      |      |      |      |                |         |               |           |  |
| MCF7                              | 0.186     | 0.973                                 | 0.910 | 0.334 | 0.241 | 0.166 | 0.017  | 92   | 19   | 7    | -11  | -91            | 3.75E-8 | 2.43E-6       | 3.07E-5   |  |
| MDA-MB-231/ATCC                   | 0.554     | 1.455                                 | 1.437 | 1.194 | 0.526 | 0.465 | 0.212  | 98   | 71   | -5   | -16  | -62            | 1.89E-7 | 8.58E-7       | 5.52E-5   |  |
| HS 578T                           | 1.525     | 2.787                                 | 2.646 | 2.482 | 2.201 | 1.702 | 1.115  | 89   | 76   | 54   | 14   | -27            | 1.23E-6 | 2.20E-5       | > 1.00E-4 |  |
| BT-549                            | 1.016     | 2.086                                 | 2.029 | 2.022 | 0.888 | 0.745 | 0.365  | 95   | 94   | -13  | -27  | -64            | 2.59E-7 | 7.61E-7       | 4.20E-5   |  |
| T-47D                             | 1.368     | 3.177                                 | 3.013 | 2.927 | 2.622 | 1.577 | 1.033  | 91   | 86   | 69   | 12   | -25            | 2.16E-6 | 2.09E-5       | > 1.00E-4 |  |
| MDA-MB-468                        | 0.702     | 1.312                                 | 1.273 | 1.181 | 0.809 | 0.669 | 0.247  | 94   | 79   | 17   | -5   | -65            | 2.93E-7 | 6.14E-6       | 5.66E-5   |  |

# Compound 6f

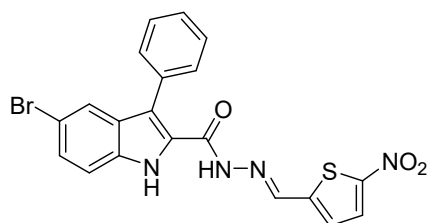

National Cancer Institute Developmental Therapeutics Program  
Dose Response Curves

NSC: D - 832479 / 1  
Report Date: January 25, 2022

SSPL: 1BCH | EXP. ID: 2111NS16  
Test Date: November 29, 2021

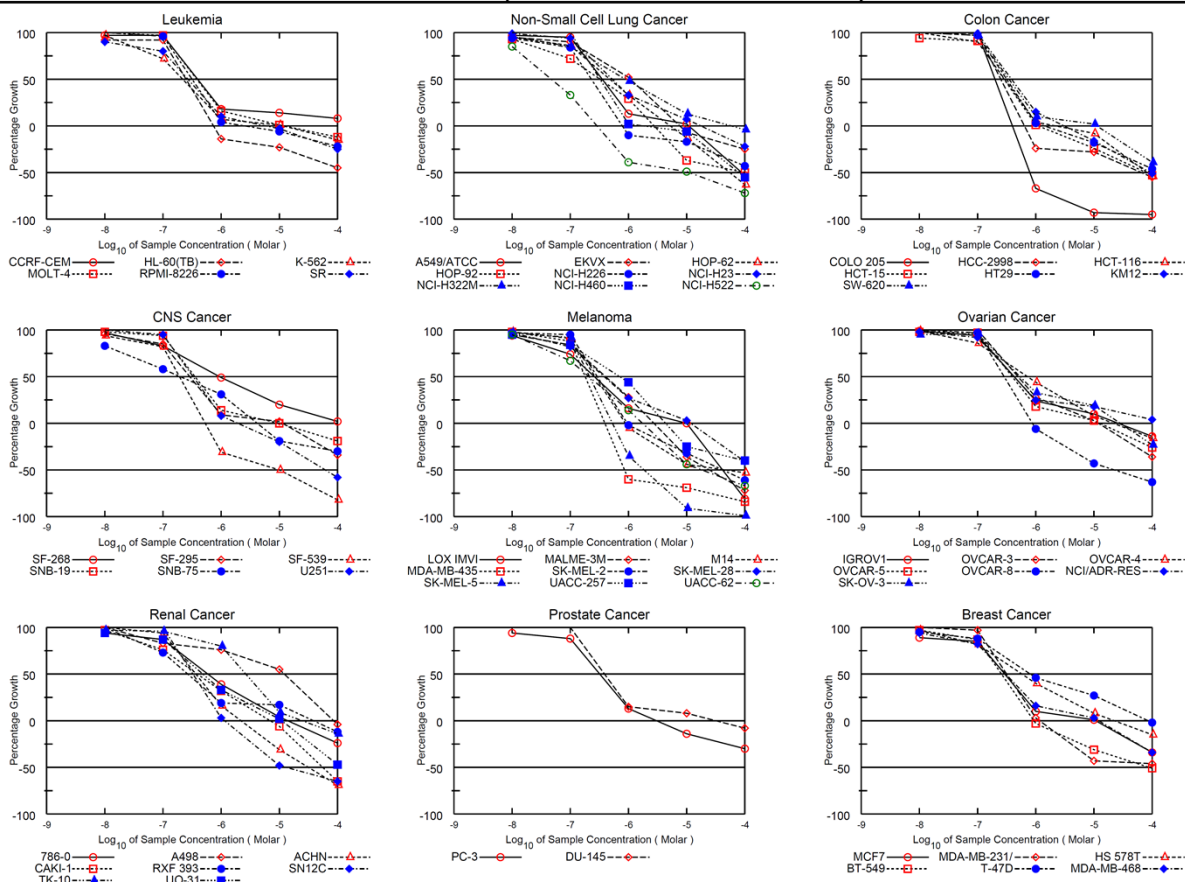

## National Cancer Institute Developmental Therapeutics Program In-Vitro Testing Results

|                                |                                       |                |               |
|--------------------------------|---------------------------------------|----------------|---------------|
| NSC : D - 832479 / 1           | Experiment ID : 2111NS16              | Test Type : 08 | Units : Molar |
| Report Date : January 25, 2022 | Test Date : November 29, 2021         | QNS :          | MC :          |
| COMI : TO6                     | Stain Reagent : SRB Dual-Pass Related | SSPL : 1BCH    |               |

| Panel/Cell Line                   | Log10 Concentration |                        |       |       |       |       |       |                |      |      |      |      | GI50    | TGI       | LC50      |
|-----------------------------------|---------------------|------------------------|-------|-------|-------|-------|-------|----------------|------|------|------|------|---------|-----------|-----------|
|                                   | Time Zero           | Mean Optical Densities |       |       |       |       |       | Percent Growth |      |      |      |      |         |           |           |
|                                   |                     | Ctrl                   | -8.0  | -7.0  | -6.0  | -5.0  | -4.0  | -8.0           | -7.0 | -6.0 | -5.0 | -4.0 |         |           |           |
| <b>Leukemia</b>                   |                     |                        |       |       |       |       |       |                |      |      |      |      |         |           |           |
| CCRF-CEM                          | 0.530               | 2.680                  | 2.616 | 2.626 | 0.927 | 0.824 | 0.699 | 97             | 97   | 18   | 14   | 8    | 3.99E-7 | > 1.00E-4 | > 1.00E-4 |
| HL-60(TB)                         | 0.572               | 2.394                  | 2.255 | 2.241 | 0.492 | 0.443 | 0.313 | 92             | 92   | -14  | -23  | -45  | 2.48E-7 | 7.37E-7   | > 1.00E-4 |
| K-562                             | 0.154               | 1.692                  | 1.640 | 1.260 | 0.254 | 0.174 | 0.132 | 97             | 72   | 7    | 1    | -15  | 2.16E-7 | 5.12E-5   | > 1.00E-4 |
| MOLT-4                            | 0.590               | 2.420                  | 2.430 | 2.362 | 0.892 | 0.600 | 0.517 | 101            | 97   | 16   | 1    | -12  | 3.83E-7 | 1.10E-5   | > 1.00E-4 |
| RPMI-8226                         | 0.581               | 2.545                  | 2.581 | 2.459 | 0.653 | 0.544 | 0.453 | 102            | 96   | 4    | -6   | -22  | 3.13E-7 | 2.31E-6   | > 1.00E-4 |
| SR                                | 0.371               | 1.699                  | 1.564 | 1.438 | 0.508 | 0.361 | 0.277 | 90             | 80   | 10   | -3   | -25  | 2.71E-7 | 6.09E-6   | > 1.00E-4 |
| <b>Non-Small Cell Lung Cancer</b> |                     |                        |       |       |       |       |       |                |      |      |      |      |         |           |           |
| A549/ATCC                         | 0.337               | 2.002                  | 1.947 | 1.926 | 0.558 | 0.373 | 0.157 | 97             | 95   | 13   | 2    | -53  | 3.57E-7 | 1.09E-5   | 8.68E-5   |
| EKVX                              | 1.027               | 1.946                  | 1.901 | 1.857 | 1.509 | 0.957 | 0.773 | 95             | 90   | 52   | -7   | -25  | 1.10E-6 | 7.67E-6   | > 1.00E-4 |
| HOP-62                            | 0.707               | 1.761                  | 1.709 | 1.618 | 1.055 | 0.613 | 0.265 | 95             | 86   | 33   | -13  | -63  | 4.80E-7 | 5.16E-6   | 5.55E-5   |
| HOP-92                            | 1.244               | 1.884                  | 1.837 | 1.705 | 1.428 | 0.784 | 0.627 | 93             | 72   | 29   | -37  | -50  | 3.22E-7 | 2.73E-6   | > 1.00E-4 |
| NCI-H226                          | 0.822               | 1.469                  | 1.432 | 1.365 | 0.742 | 0.679 | 0.472 | 94             | 84   | -10  | -17  | -43  | 2.30E-7 | 7.87E-7   | > 1.00E-4 |
| NCI-H23                           | 0.419               | 1.454                  | 1.441 | 1.388 | 0.765 | 0.493 | 0.325 | 99             | 94   | 33   | 7    | -22  | 5.31E-7 | 1.74E-5   | > 1.00E-4 |
| NCI-H322M                         | 0.810               | 2.060                  | 2.010 | 1.875 | 1.408 | 0.976 | 0.774 | 96             | 85   | 48   | 13   | -4   | 8.74E-7 | 5.61E-5   | > 1.00E-4 |
| NCI-H460                          | 0.323               | 3.092                  | 3.133 | 3.096 | 0.390 | 0.305 | 0.145 | 101            | 100  | 2    | -6   | -55  | 3.26E-7 | 1.98E-6   | 7.83E-5   |
| NCI-H522                          | 1.038               | 2.287                  | 2.105 | 1.450 | 0.634 | 0.527 | 0.295 | 85             | 33   | -39  | -49  | -72  | 4.73E-8 | 2.87E-7   | 1.08E-5   |
| <b>Colon Cancer</b>               |                     |                        |       |       |       |       |       |                |      |      |      |      |         |           |           |
| COLO 205                          | 0.628               | 2.417                  | 2.455 | 2.454 | 0.209 | 0.044 | 0.033 | 102            | 102  | -67  | -93  | -95  | 2.03E-7 | 4.02E-7   | 7.95E-7   |
| HCC-2998                          | 0.495               | 1.603                  | 1.636 | 1.596 | 0.377 | 0.359 | 0.224 | 103            | 99   | -24  | -28  | -55  | 2.51E-7 | 6.39E-7   | 6.64E-5   |
| HCT-116                           | 0.226               | 2.551                  | 2.562 | 2.309 | 0.321 | 0.207 | 0.105 | 100            | 90   | 4    | -8   | -54  | 2.90E-7 | 2.12E-6   | 8.26E-5   |
| HCT-15                            | 0.217               | 1.541                  | 1.458 | 1.422 | 0.227 | 0.165 | 0.102 | 94             | 91   | 1    | -24  | -53  | 2.85E-7 | 1.07E-6   | 7.89E-5   |
| HT29                              | 0.373               | 2.184                  | 2.187 | 2.137 | 0.425 | 0.307 | 0.203 | 100            | 97   | 3    | -18  | -46  | 3.17E-7 | 1.38E-6   | > 1.00E-4 |
| KM12                              | 0.833               | 3.339                  | 3.351 | 3.324 | 1.199 | 0.699 | 0.410 | 100            | 99   | 15   | -16  | -51  | 3.82E-7 | 2.99E-6   | 9.50E-5   |
| SW-620                            | 0.333               | 2.633                  | 2.640 | 2.576 | 0.564 | 0.373 | 0.204 | 100            | 97   | 10   | 2    | -39  | 3.49E-7 | 1.10E-5   | > 1.00E-4 |
| <b>CNS Cancer</b>                 |                     |                        |       |       |       |       |       |                |      |      |      |      |         |           |           |
| SF-268                            | 1.079               | 2.978                  | 2.913 | 2.655 | 2.011 | 1.454 | 1.119 | 97             | 83   | 49   | 20   | 2    | 9.39E-7 | > 1.00E-4 | > 1.00E-4 |
| SF-295                            | 0.472               | 1.981                  | 1.924 | 1.755 | 0.613 | 0.504 | 0.310 | 96             | 85   | 9    | 2    | -34  | 2.90E-7 | 1.14E-5   | > 1.00E-4 |
| SF-539                            | 0.563               | 1.741                  | 1.676 | 1.528 | 0.387 | 0.280 | 0.101 | 94             | 82   | -31  | -50  | -82  | 1.91E-7 | 5.29E-7   | 9.68E-6   |
| SNB-19                            | 0.527               | 1.817                  | 1.797 | 1.735 | 0.712 | 0.532 | 0.426 | 98             | 94   | 14   | 0    | -19  | 3.55E-7 | 1.04E-5   | > 1.00E-4 |
| SNB-75                            | 2.216               | 3.142                  | 2.983 | 2.753 | 2.502 | 1.799 | 1.543 | 83             | 58   | 31   | -19  | -30  | 1.97E-7 | 4.18E-6   | > 1.00E-4 |
| U251                              | 0.581               | 2.715                  | 2.768 | 2.617 | 0.759 | 0.464 | 0.244 | 102            | 95   | 8    | -20  | -58  | 3.32E-7 | 1.96E-6   | 6.14E-5   |
| <b>Melanoma</b>                   |                     |                        |       |       |       |       |       |                |      |      |      |      |         |           |           |
| LOX IMVI                          | 0.163               | 1.272                  | 1.210 | 0.985 | 0.340 | 0.163 | 0.032 | 94             | 74   | 16   | 0    | -81  | 2.60E-7 | 1.00E-5   | 4.17E-5   |
| MALME-3M                          | 0.726               | 1.434                  | 1.399 | 1.317 | 0.928 | 0.463 | 0.202 | 95             | 84   | 28   | -36  | -72  | 4.06E-7 | 2.75E-6   | 2.41E-5   |
| M14                               | 0.470               | 2.002                  | 1.975 | 1.870 | 0.448 | 0.262 | 0.221 | 98             | 91   | -5   | -44  | -53  | 2.69E-7 | 8.92E-7   | 4.56E-5   |
| MDA-MB-435                        | 0.779               | 3.098                  | 3.062 | 2.820 | 0.315 | 0.239 | 0.127 | 98             | 88   | -60  | -69  | -84  | 1.81E-7 | 3.95E-7   | 8.61E-7   |
| SK-MEL-2                          | 1.232               | 2.583                  | 2.536 | 2.516 | 1.207 | 0.841 | 0.484 | 97             | 95   | -2   | -32  | -61  | 2.91E-7 | 9.63E-7   | 4.27E-5   |
| SK-MEL-28                         | 0.523               | 1.753                  | 1.714 | 1.529 | 0.858 | 0.561 | 0.306 | 97             | 82   | 27   | 3    | -41  | 3.83E-7 | 1.17E-5   | > 1.00E-4 |
| SK-MEL-5                          | 0.640               | 2.747                  | 2.686 | 2.572 | 0.419 | 0.057 | 0.004 | 97             | 92   | -35  | -91  | -99  | 2.14E-7 | 5.32E-7   | 1.87E-6   |
| UACC-257                          | 0.948               | 2.460                  | 2.387 | 2.218 | 1.613 | 0.712 | 0.565 | 95             | 84   | 44   | -25  | -40  | 7.06E-7 | 4.35E-6   | > 1.00E-4 |
| UACC-62                           | 0.837               | 2.854                  | 2.761 | 2.197 | 1.128 | 0.468 | 0.280 | 95             | 67   | 14   | -44  | -67  | 2.13E-7 | 1.76E-6   | 1.82E-5   |
| <b>Ovarian Cancer</b>             |                     |                        |       |       |       |       |       |                |      |      |      |      |         |           |           |
| IGROV1                            | 0.501               | 2.222                  | 2.204 | 2.120 | 0.909 | 0.667 | 0.433 | 99             | 94   | 24   | 10   | -14  | 4.23E-7 | 2.59E-5   | > 1.00E-4 |
| OVCAR-3                           | 1.057               | 2.862                  | 2.896 | 2.858 | 1.565 | 1.118 | 0.681 | 102            | 100  | 28   | 3    | -36  | 4.95E-7 | 1.22E-5   | > 1.00E-4 |
| OVCAR-4                           | 0.841               | 1.927                  | 1.920 | 1.776 | 1.319 | 0.932 | 0.707 | 99             | 86   | 44   | 8    | -16  | 7.21E-7 | 2.20E-5   | > 1.00E-4 |
| OVCAR-5                           | 0.567               | 1.661                  | 1.635 | 1.624 | 0.765 | 0.600 | 0.419 | 98             | 97   | 18   | 3    | -26  | 3.92E-7 | 1.27E-5   | > 1.00E-4 |
| OVCAR-8                           | 0.512               | 2.503                  | 2.512 | 2.450 | 0.483 | 0.290 | 0.189 | 100            | 97   | -6   | -43  | -63  | 2.88E-7 | 8.79E-7   | 2.17E-5   |
| NCI/ADR-RES                       | 0.370               | 1.347                  | 1.328 | 1.271 | 0.619 | 0.547 | 0.414 | 98             | 92   | 25   | 18   | 4    | 4.29E-7 | > 1.00E-4 | > 1.00E-4 |
| SK-OV-3                           | 0.967               | 1.799                  | 1.755 | 1.762 | 1.240 | 1.129 | 0.744 | 95             | 96   | 33   | 19   | -23  | 5.32E-7 | 2.87E-5   | > 1.00E-4 |
| <b>Renal Cancer</b>               |                     |                        |       |       |       |       |       |                |      |      |      |      |         |           |           |
| 786-0                             | 0.578               | 2.478                  | 2.370 | 2.237 | 1.313 | 0.653 | 0.441 | 94             | 87   | 39   | 4    | -24  | 5.85E-7 | 1.39E-5   | > 1.00E-4 |
| A498                              | 1.326               | 2.077                  | 2.118 | 1.947 | 1.898 | 1.738 | 1.270 | 105            | 83   | 76   | 55   | -4   | 1.21E-5 | 8.48E-5   | > 1.00E-4 |
| ACHN                              | 0.286               | 1.150                  | 1.164 | 1.102 | 0.422 | 0.198 | 0.088 | 102            | 94   | 16   | -31  | -69  | 3.66E-7 | 2.17E-6   | 3.15E-5   |
| CAKI-1                            | 0.680               | 2.202                  | 2.156 | 1.844 | 1.164 | 0.637 | 0.238 | 97             | 76   | 32   | -6   | -65  | 3.91E-7 | 6.82E-6   | 5.54E-5   |
| RXF 393                           | 0.651               | 1.232                  | 1.233 | 1.073 | 0.764 | 0.752 | 0.576 | 100            | 73   | 19   | 17   | -12  | 2.66E-7 | 4.00E-5   | > 1.00E-4 |
| SN12C                             | 0.520               | 1.842                  | 1.854 | 1.856 | 0.554 | 0.269 | 0.183 | 101            | 101  | 3    | -48  | -65  | 3.30E-7 | 1.12E-6   | 1.26E-5   |
| TK-10                             | 1.216               | 1.970                  | 1.948 | 1.942 | 1.821 | 1.287 | 1.042 | 97             | 96   | 80   | 9    | -14  | 2.67E-6 | 2.48E-5   | > 1.00E-4 |
| UO-31                             | 0.500               | 2.110                  | 2.011 | 1.898 | 1.026 | 0.537 | 0.267 | 94             | 87   | 33   | 2    | -47  | 4.78E-7 | 1.11E-5   | > 1.00E-4 |
| <b>Prostate Cancer</b>            |                     |                        |       |       |       |       |       |                |      |      |      |      |         |           |           |
| PC-3                              | 0.628               | 2.219                  | 2.127 | 2.021 | 0.838 | 0.540 | 0.441 | 94             | 88   | 13   | -14  | -30  | 3.20E-7 | 3.04E-6   | > 1.00E-4 |
| DU-145                            | 0.333               | 1.686                  | 1.748 | 1.691 | 0.537 | 0.441 | 0.305 | 105            | 100  | 15   | 8    | -8   | 3.89E-7 | 3.07E-5   | > 1.00E-4 |
| <b>Breast Cancer</b>              |                     |                        |       |       |       |       |       |                |      |      |      |      |         |           |           |
| MCF7                              | 0.186               | 0.972                  | 0.888 | 0.856 | 0.262 | 0.192 | 0.123 | 89             | 85   | 10   | 1    | -34  | 2.93E-7 | 1.05E-5   | > 1.00E-4 |
| MDA-MB-231/ATCC                   | 0.554               | 1.361                  | 1.394 | 1.338 | 0.577 | 0.318 | 0.299 | 104            | 97   | 3    | -43  | -46  | 3.16E-7 | 1.16E-6   | > 1.00E-4 |
| HS 578T                           | 1.525               | 2.778                  | 2.737 | 2.547 | 2.024 | 1.621 | 1.299 | 97             | 82   | 40   | 8    | -15  | 5.70E-7 | 2.19E-5   | > 1.00E-4 |
| BT-549                            | 1.016               | 2.122                  | 2.087 | 1.979 | 0.985 | 0.698 | 0.495 | 97             | 87   | -3   | -31  | -51  | 2.57E-7 | 9.24E-7   | 8.58E-5   |
| T-47D                             | 1.368               | 3.118                  | 3.032 | 2.905 | 2.172 | 1.848 | 1.336 | 95             | 88   | 46   | 27   | -2   | 8.00E-7 | 8.34E-5   | > 1.00E-4 |
| MDA-MB-468                        | 0.702               | 1.382                  | 1.341 | 1.263 | 0.810 | 0.721 | 0.466 | 94             | 82   | 16   | 3    | -34  | 3.08E-7 | 1.19E-5   | > 1.00E-4 |



# Compound 6g

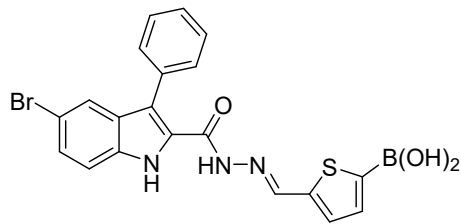

National Cancer Institute Developmental Therapeutics Program  
Dose Response Curves

NSC: D - 834627 / 1  
Report Date: June 26, 2022

SSPL: 1BCH  
Test Date: May 16, 2022

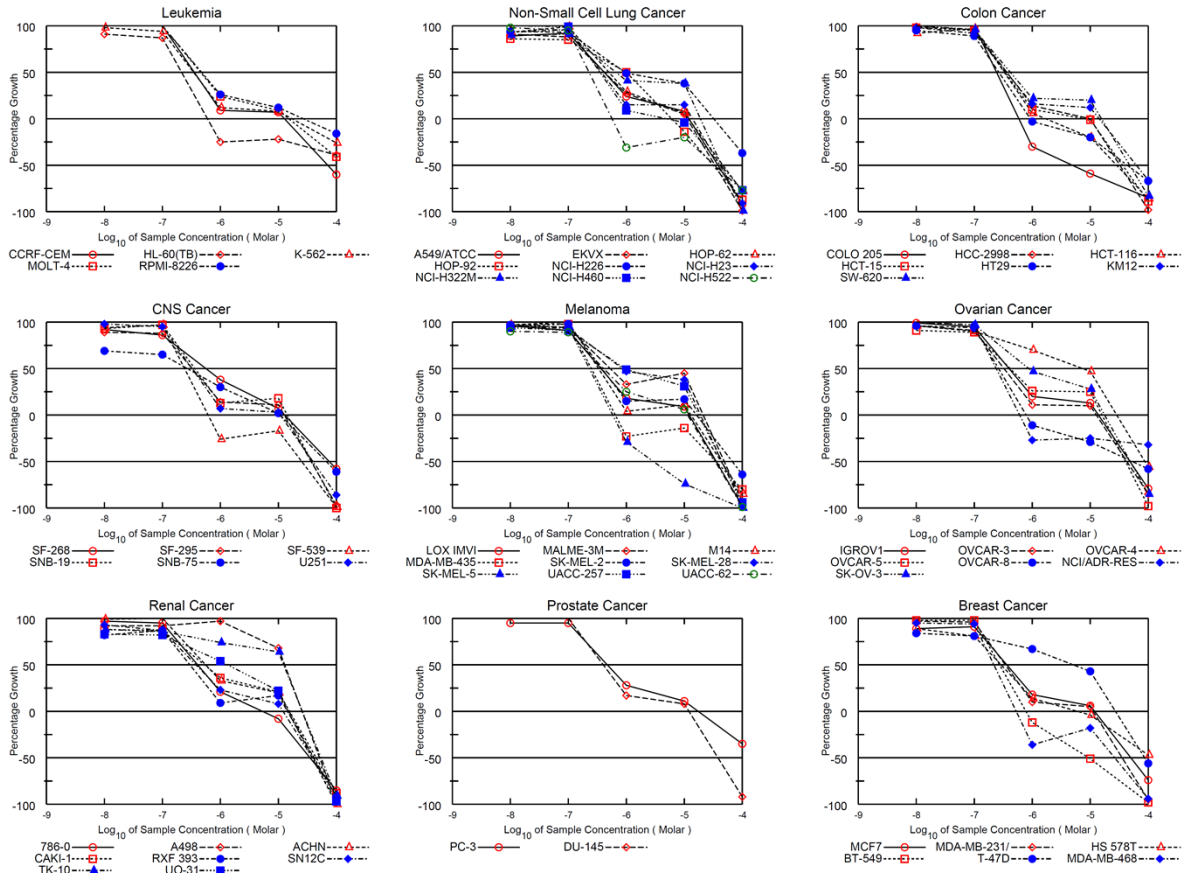

## National Cancer Institute Developmental Therapeutics Program In-Vitro Testing Results

| NSC : D - 834627 / 1              |           | Experiment ID : 2205RS21              |       |       |       |       |        | Test Type : 08 |      |      |      |      | Units : Molar |         |           |  |
|-----------------------------------|-----------|---------------------------------------|-------|-------|-------|-------|--------|----------------|------|------|------|------|---------------|---------|-----------|--|
| Report Date : June 26, 2022       |           | Test Date : May 16, 2022              |       |       |       |       |        | QNS :          |      |      |      |      | MC :          |         |           |  |
| COMI : TO20                       |           | Stain Reagent : SRB Dual-Pass Related |       |       |       |       |        | SSPL : 1BCH    |      |      |      |      |               |         |           |  |
| Panel/Cell Line                   | Time Zero | Log10 Concentration                   |       |       |       |       |        | Percent Growth |      |      |      |      | GI50          | TGI     | LC50      |  |
|                                   |           | Ctrl                                  | -8.0  | -7.0  | -6.0  | -5.0  | -4.0   | -8.0           | -7.0 | -6.0 | -5.0 | -4.0 |               |         |           |  |
| <b>Leukemia</b>                   |           |                                       |       |       |       |       |        |                |      |      |      |      |               |         |           |  |
| CCRF-CEM                          | 0.530     | 2.258                                 | 2.278 | 2.265 | 0.690 | 0.650 | 0.212  | 101            | 100  | 9    | 7    | -60  | 3.57E-7       | 1.27E-5 | 7.07E-5   |  |
| HL-60(TB)                         | 0.688     | 2.670                                 | 2.493 | 2.412 | 0.517 | 0.535 | 0.418  | 91             | 87   | -25  | -22  | -39  | 2.14E-7       | 5.99E-7 | > 1.00E-4 |  |
| K-562                             | 0.176     | 1.788                                 | 1.757 | 1.697 | 0.376 | 0.310 | 0.130  | 98             | 94   | 12   | 8    | -26  | 3.48E-7       | 1.74E-5 | > 1.00E-4 |  |
| MOLT-4                            | 0.657     | 2.549                                 | 2.661 | 2.622 | 1.112 | 0.832 | 0.386  | 106            | 104  | 24   | 9    | -41  | 4.73E-7       | 1.52E-5 | > 1.00E-4 |  |
| RPMI-8226                         | 0.614     | 2.544                                 | 2.632 | 2.598 | 1.123 | 0.848 | 0.519  | 105            | 103  | 26   | 12   | -16  | 4.91E-7       | 2.74E-5 | > 1.00E-4 |  |
| <b>Non-Small Cell Lung Cancer</b> |           |                                       |       |       |       |       |        |                |      |      |      |      |               |         |           |  |
| A549/ATCC                         | 0.494     | 2.413                                 | 2.204 | 2.256 | 0.950 | 0.647 | 0.040  | 89             | 92   | 24   | 8    | -92  | 4.12E-7       | 1.20E-5 | 3.81E-5   |  |
| EKVX                              | 0.607     | 1.950                                 | 1.831 | 1.792 | 0.971 | 0.679 | 0.006  | 91             | 88   | 27   | 5    | -99  | 4.22E-7       | 1.12E-5 | 3.39E-5   |  |
| HOP-62                            | 0.777     | 2.505                                 | 2.392 | 2.484 | 1.280 | 0.886 | 0.175  | 93             | 99   | 29   | 6    | -78  | 5.01E-7       | 1.19E-5 | 4.69E-5   |  |
| HOP-92                            | 1.219     | 1.767                                 | 1.692 | 1.687 | 1.495 | 1.046 | 0.163  | 86             | 85   | 50   | -14  | -87  | 1.01E-6       | 6.03E-6 | 3.12E-5   |  |
| NCI-H226                          | 0.799     | 1.945                                 | 1.872 | 1.860 | 1.358 | 1.237 | 0.500  | 94             | 93   | 49   | 38   | -37  | 9.36E-7       | 3.20E-5 | > 1.00E-4 |  |
| NCI-H23                           | 0.592     | 1.848                                 | 1.765 | 1.798 | 0.780 | 0.778 | 0.053  | 93             | 96   | 15   | 15   | -91  | 3.70E-7       | 1.38E-5 | 4.09E-5   |  |
| NCI-H322M                         | 0.872     | 2.256                                 | 2.113 | 2.129 | 1.443 | 1.400 | 0.005  | 90             | 91   | 41   | 38   | -99  | 6.66E-7       | 1.89E-5 | 4.37E-5   |  |
| NCI-H460                          | 0.272     | 2.581                                 | 2.593 | 2.555 | 0.916 | 0.261 | 0.062  | 101            | 99   | 9    | -4   | -77  | 3.52E-7       | 5.02E-6 | 4.25E-5   |  |
| NCI-H522                          | 1.467     | 3.253                                 | 3.210 | 3.157 | 1.009 | 1.173 | 0.336  | 98             | 95   | -31  | -20  | -77  | 2.26E-7       | 5.64E-7 | 3.35E-5   |  |
| <b>Colon Cancer</b>               |           |                                       |       |       |       |       |        |                |      |      |      |      |               |         |           |  |
| COLO 205                          | 0.668     | 2.316                                 | 2.344 | 2.332 | 0.465 | 0.277 | 0.099  | 102            | 101  | -30  | -59  | -85  | 2.44E-7       | 5.87E-7 | 4.98E-6   |  |
| HCC-2998                          | 0.612     | 2.183                                 | 2.173 | 2.121 | 0.825 | 0.610 | 0.013  | 99             | 96   | 14   | 0    | -98  | 3.62E-7       | 9.47E-6 | 3.23E-5   |  |
| HCT-116                           | 0.286     | 2.765                                 | 2.578 | 2.693 | 0.429 | 0.229 | 0.041  | 92             | 97   | 6    | -20  | -86  | 3.28E-7       | 1.68E-6 | 2.87E-5   |  |
| HCT-15                            | 0.504     | 2.784                                 | 2.738 | 2.668 | 0.733 | 0.497 | 0.054  | 98             | 95   | 10   | -1   | -89  | 3.38E-7       | 7.43E-6 | 3.56E-5   |  |
| HT29                              | 0.322     | 2.078                                 | 1.988 | 1.888 | 0.312 | 0.259 | 0.107  | 95             | 89   | -3   | -20  | -67  | 2.66E-7       | 9.25E-7 | 4.41E-5   |  |
| KM12                              | 0.525     | 2.895                                 | 2.845 | 2.706 | 0.916 | 0.800 | 0.181  | 98             | 92   | 16   | 12   | -66  | 3.60E-7       | 1.41E-5 | 6.28E-5   |  |
| SW-620                            | 0.282     | 1.969                                 | 1.967 | 1.902 | 0.651 | 0.618 | 0.049  | 100            | 96   | 22   | 20   | -83  | 4.17E-7       | 1.56E-5 | 4.79E-5   |  |
| <b>CNS Cancer</b>                 |           |                                       |       |       |       |       |        |                |      |      |      |      |               |         |           |  |
| SF-268                            | 0.997     | 2.758                                 | 2.611 | 2.505 | 1.662 | 1.115 | 0.418  | 92             | 86   | 38   | 7    | -58  | 5.55E-7       | 1.27E-5 | 7.51E-5   |  |
| SF-295                            | 0.729     | 2.481                                 | 2.280 | 2.276 | 0.967 | 0.916 | 0.020  | 89             | 88   | 14   | 11   | -97  | 3.25E-7       | 1.26E-5 | 3.65E-5   |  |
| SF-539                            | 0.595     | 1.973                                 | 1.891 | 1.931 | 0.443 | 0.495 | 0.005  | 94             | 97   | -26  | -17  | -99  | 2.42E-7       | 6.19E-7 | 2.53E-5   |  |
| SNB-19                            | 0.778     | 2.196                                 | 2.090 | 2.159 | 0.958 | 1.030 | 0.003  | 93             | 97   | 13   | 18   | -100 | 3.63E-7       | 1.42E-5 | 3.78E-5   |  |
| SNB-75                            | 1.350     | 2.344                                 | 2.039 | 2.000 | 1.653 | 1.366 | 0.528  | 69             | 65   | 30   | 2    | -61  | 2.76E-7       | 1.06E-5 | 6.69E-5   |  |
| U251                              | 0.364     | 1.785                                 | 1.761 | 1.713 | 0.457 | 0.407 | 0.050  | 98             | 95   | 7    | 3    | -86  | 3.22E-7       | 1.08E-5 | 3.92E-5   |  |
| <b>Melanoma</b>                   |           |                                       |       |       |       |       |        |                |      |      |      |      |               |         |           |  |
| LOX IMVI                          | 0.358     | 2.385                                 | 2.300 | 2.212 | 0.731 | 0.550 | 0.006  | 96             | 91   | 18   | 9    | -98  | 3.69E-7       | 1.22E-5 | 3.56E-5   |  |
| MALME-3M                          | 0.613     | 1.361                                 | 1.337 | 1.320 | 0.861 | 0.953 | 0.045  | 97             | 94   | 33   | 45   | -93  | 5.31E-7       | 2.13E-5 | 4.91E-5   |  |
| M14                               | 0.419     | 1.638                                 | 1.606 | 1.645 | 0.473 | 0.553 | 0.064  | 97             | 101  | 4    | 11   | -85  | 3.36E-7       | 1.30E-5 | 4.34E-5   |  |
| MDA-MB-435                        | 0.621     | 2.650                                 | 2.558 | 2.613 | 1.079 | 0.531 | 0.124  | 95             | 98   | -23  | -14  | -80  | 2.50E-7       | 6.46E-7 | 3.48E-5   |  |
| SK-MEL-2                          | 0.850     | 2.488                                 | 2.440 | 2.454 | 1.111 | 1.121 | 0.305  | 97             | 98   | 15   | 17   | -64  | 3.80E-7       | 1.60E-5 | 6.67E-5   |  |
| SK-MEL-28                         | 0.690     | 1.916                                 | 1.870 | 1.829 | 1.265 | 1.153 | 0.016  | 96             | 93   | 47   | 38   | -98  | 8.56E-7       | 1.90E-5 | 4.44E-5   |  |
| SK-MEL-5                          | 1.042     | 3.190                                 | 3.078 | 3.074 | 0.744 | 0.275 | 0.002  | 95             | 95   | -29  | -74  | -100 | 2.30E-7       | 5.86E-7 | 2.98E-6   |  |
| UACC-257                          | 1.034     | 2.377                                 | 2.293 | 2.258 | 1.696 | 1.450 | 0.066  | 94             | 91   | 49   | 31   | -94  | 9.61E-7       | 1.77E-5 | 4.47E-5   |  |
| UACC-62                           | 0.758     | 2.407                                 | 2.239 | 2.219 | 1.177 | 0.859 | 0.005  | 90             | 89   | 25   | 6    | -99  | 4.08E-7       | 1.14E-5 | 3.40E-5   |  |
| <b>Ovarian Cancer</b>             |           |                                       |       |       |       |       |        |                |      |      |      |      |               |         |           |  |
| IGROV1                            | 0.808     | 2.604                                 | 2.579 | 2.521 | 1.172 | 1.038 | 0.173  | 99             | 95   | 20   | 13   | -79  | 4.02E-7       | 1.38E-5 | 4.86E-5   |  |
| OVCAR-3                           | 0.282     | 1.202                                 | 1.161 | 1.124 | 0.382 | 0.375 | 0.043  | 96             | 91   | 11   | 10   | -85  | 3.27E-7       | 1.28E-5 | 4.29E-5   |  |
| OVCAR-4                           | 0.639     | 1.743                                 | 1.699 | 1.631 | 1.415 | 1.156 | 0.279  | 96             | 90   | 70   | 47   | -56  | 7.31E-6       | 2.84E-5 | 8.67E-5   |  |
| OVCAR-5                           | 0.622     | 1.513                                 | 1.437 | 1.411 | 0.858 | 0.849 | 0.010  | 91             | 89   | 26   | 25   | -98  | 4.17E-7       | 1.61E-5 | 4.07E-5   |  |
| OVCAR-8                           | 0.494     | 2.247                                 | 2.172 | 2.134 | 0.441 | 0.349 | 0.207  | 96             | 94   | -11  | -29  | -58  | 2.61E-7       | 7.87E-7 | 5.23E-5   |  |
| NCI/ADR-RES                       | 0.568     | 1.907                                 | 1.939 | 1.864 | 0.415 | 0.429 | 0.385  | 102            | 97   | -27  | -25  | -32  | 2.39E-7       | 6.06E-7 | > 1.00E-4 |  |
| SK-OV-3                           | 0.943     | 2.154                                 | 2.184 | 2.114 | 1.516 | 1.282 | 0.143  | 102            | 97   | 47   | 28   | -85  | 8.81E-7       | 1.77E-5 | 4.91E-5   |  |
| <b>Renal Cancer</b>               |           |                                       |       |       |       |       |        |                |      |      |      |      |               |         |           |  |
| 786-0                             | 0.851     | 2.847                                 | 2.791 | 2.748 | 1.262 | 0.786 | 0.130  | 97             | 95   | 21   | -8   | -85  | 4.03E-7       | 5.34E-6 | 3.54E-5   |  |
| A498                              | 1.410     | 2.087                                 | 2.031 | 2.036 | 2.070 | 1.868 | 0.035  | 92             | 92   | 97   | 68   | -98  | 1.28E-5       | 2.57E-5 | 5.16E-5   |  |
| ACHN                              | 0.397     | 1.716                                 | 1.703 | 1.755 | 0.831 | 0.667 | -0.002 | 99             | 103  | 33   | 20   | -100 | 5.69E-7       | 1.48E-5 | 3.85E-5   |  |
| CAKI-1                            | 0.555     | 2.214                                 | 2.007 | 2.003 | 1.146 | 0.909 | 0.067  | 88             | 87   | 36   | 21   | -88  | 5.27E-7       | 1.57E-5 | 4.50E-5   |  |
| RXF 393                           | 1.247     | 1.757                                 | 1.667 | 1.693 | 1.295 | 1.336 | 0.099  | 82             | 87   | 9    | 17   | -92  | 3.01E-7       | 1.44E-5 | 4.13E-5   |  |
| SN12C                             | 0.894     | 2.900                                 | 2.767 | 2.638 | 1.364 | 1.046 | 0.080  | 93             | 87   | 23   | 8    | -91  | 3.81E-7       | 1.19E-5 | 3.83E-5   |  |
| TK-10                             | 1.145     | 2.314                                 | 2.171 | 2.150 | 2.008 | 1.888 | 0.105  | 88             | 86   | 74   | 64   | -91  | 1.22E-5       | 2.58E-5 | 5.44E-5   |  |
| UO-31                             | 0.917     | 2.477                                 | 2.218 | 2.201 | 1.760 | 1.261 | 0.030  | 83             | 82   | 54   | 22   | -97  | 1.34E-6       | 1.53E-5 | 4.04E-5   |  |
| <b>Prostate Cancer</b>            |           |                                       |       |       |       |       |        |                |      |      |      |      |               |         |           |  |
| PC-3                              | 0.603     | 2.251                                 | 2.164 | 2.165 | 1.058 | 0.792 | 0.391  | 95             | 95   | 28   | 11   | -35  | 4.64E-7       | 1.76E-5 | > 1.00E-4 |  |
| DU-145                            | 0.347     | 1.608                                 | 1.647 | 1.611 | 0.564 | 0.448 | 0.029  | 103            | 100  | 17   | 8    | -92  | 4.03E-7       | 1.20E-5 | 3.81E-5   |  |
| <b>Breast Cancer</b>              |           |                                       |       |       |       |       |        |                |      |      |      |      |               |         |           |  |
| MCF7                              | 0.579     | 2.420                                 | 2.223 | 2.256 | 0.904 | 0.696 | 0.152  | 89             | 91   | 18   | 6    | -74  | 3.63E-7       | 1.20E-5 | 5.04E-5   |  |
| MDA-MB-231/ATCC                   | 0.616     | 1.576                                 | 1.544 | 1.540 | 0.716 | 0.660 | 0.030  | 97             | 96   | 10   | 5    | -95  | 3.45E-7       | 1.11E-5 | 3.53E-5   |  |
| HS 578T                           | 1.342     | 2.257                                 | 2.157 | 2.084 | 1.471 | 1.286 | 0.708  | 89             | 81   | 14   | -4   | -47  | 2.90E-7       | 5.88E-6 | > 1.00E-4 |  |
| BT-549                            | 1.345     | 2.332                                 | 2.314 | 2.308 | 1.184 | 0.654 | 0.026  | 98             | 98   | -12  | -51  | -98  | 2.72E-7       | 7.77E-7 | 9.21E-6   |  |
| T-47D                             | 1.225     | 2.796                                 | 2.551 | 2.504 | 2.282 | 1.899 | 0.535  | 84             | 81   | 67   | 43   | -56  | 5.12E-6       | 2.71E-5 | 8.63E-5   |  |
| MDA-MB-468                        | 0.913     | 1.926                                 | 1.879 | 1.860 | 0.582 | 0.746 | 0.052  | 95             | 94   | -36  | -18  | -94  | 2.16E-7       | 5.26E-7 | 2.61E-5   |  |

# Compound 6h

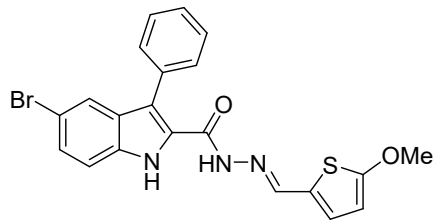

National Cancer Institute Developmental Therapeutics Program  
Dose Response Curves

NSC: D - 832478 / 1

Report Date: January 25, 2022

SSPL: 1BCH

EXP. ID: 2111NS16

Test Date: November 29, 2021

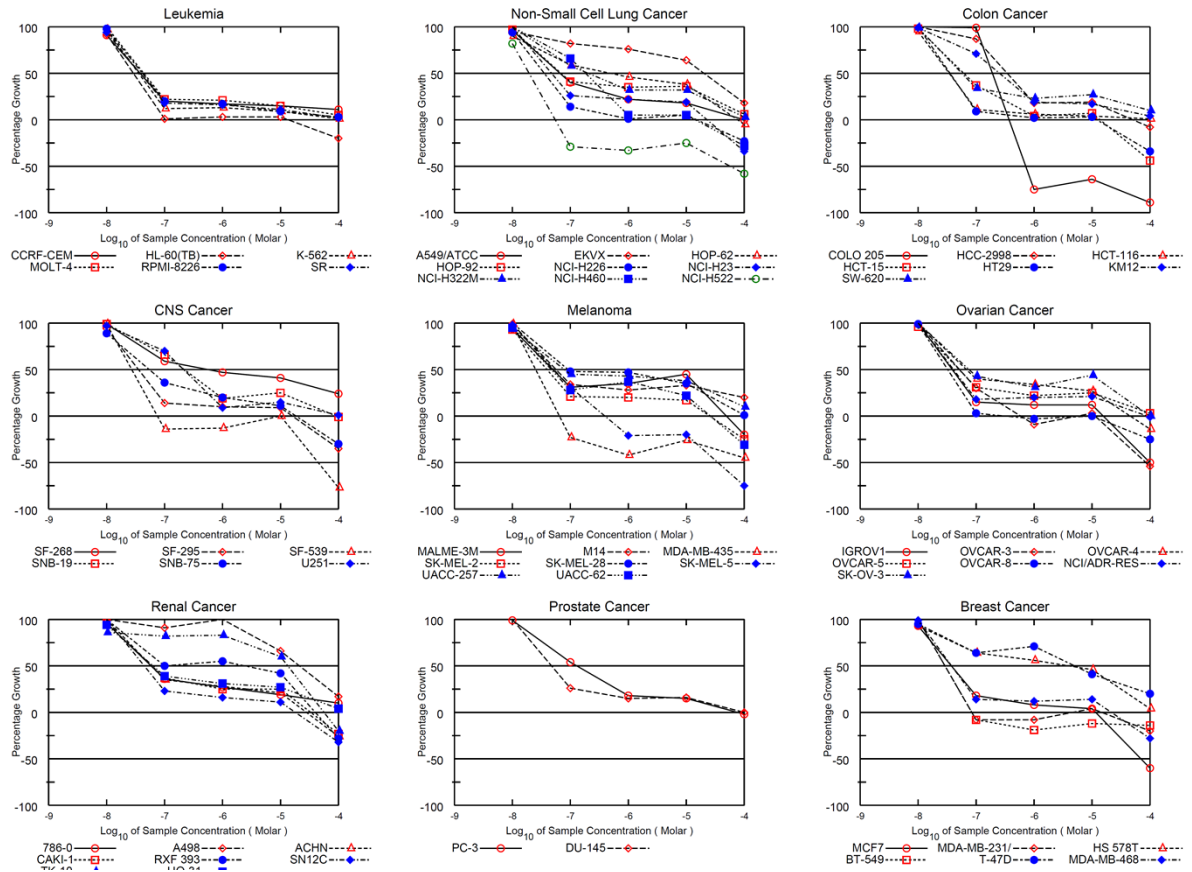

## National Cancer Institute Developmental Therapeutics Program In-Vitro Testing Results

|                                |                                       |                |               |
|--------------------------------|---------------------------------------|----------------|---------------|
| NSC : D - 832478 / 1           | Experiment ID : 2111NS16              | Test Type : 08 | Units : Molar |
| Report Date : January 25, 2022 | Test Date : November 29, 2021         | QNS :          | MC :          |
| COMI : TO5                     | Stain Reagent : SRB Dual-Pass Related | SSPL : 1BCH    |               |

| Panel/Cell Line                   | Log10 Concentration |                        |       |       |       |       |       |                |      |      |      |      | GI50    | TGI       | LC50      |
|-----------------------------------|---------------------|------------------------|-------|-------|-------|-------|-------|----------------|------|------|------|------|---------|-----------|-----------|
|                                   | Time Zero           | Mean Optical Densities |       |       |       |       |       | Percent Growth |      |      |      |      |         |           |           |
|                                   |                     | Ctrl                   | -8.0  | -7.0  | -6.0  | -5.0  | -4.0  | -8.0           | -7.0 | -6.0 | -5.0 | -4.0 |         |           |           |
| <b>Leukemia</b>                   |                     |                        |       |       |       |       |       |                |      |      |      |      |         |           |           |
| CCRF-CEM                          | 0.530               | 2.745                  | 2.555 | 0.965 | 0.912 | 0.859 | 0.768 | 91             | 20   | 17   | 15   | 11   | 3.77E-8 | > 1.00E-4 | > 1.00E-4 |
| HL-60(TB)                         | 0.572               | 2.714                  | 2.542 | 0.589 | 0.634 | 0.634 | 0.460 | 92             | 1    | 3    | 3    | -20  | 2.88E-8 | 1.34E-5   | > 1.00E-4 |
| K-562                             | 0.154               | 1.827                  | 1.778 | 0.358 | 0.374 | 0.309 | 0.167 | 97             | 12   | 13   | 9    | 1    | 3.58E-8 | > 1.00E-4 | > 1.00E-4 |
| MOLT-4                            | 0.590               | 2.547                  | 2.580 | 1.018 | 0.996 | 0.890 | 0.695 | 102            | 22   | 21   | 15   | 5    | 4.44E-8 | > 1.00E-4 | > 1.00E-4 |
| RPMI-8226                         | 0.581               | 2.611                  | 2.568 | 0.983 | 0.917 | 0.755 | 0.650 | 98             | 20   | 17   | 9    | 3    | 4.10E-8 | > 1.00E-4 | > 1.00E-4 |
| SR                                | 0.371               | 1.871                  | 1.779 | 0.635 | 0.611 | 0.529 | 0.402 | 94             | 18   | 16   | 11   | 2    | 3.76E-8 | > 1.00E-4 | > 1.00E-4 |
| <b>Non-Small Cell Lung Cancer</b> |                     |                        |       |       |       |       |       |                |      |      |      |      |         |           |           |
| A549(ATCC)                        | 0.337               | 2.048                  | 1.975 | 1.015 | 0.712 | 0.643 | 0.343 | 96             | 40   | 22   | 18   | 0    | 6.53E-8 | > 1.00E-4 | > 1.00E-4 |
| EKVX                              | 1.027               | 1.947                  | 1.898 | 1.781 | 1.730 | 1.613 | 1.189 | 95             | 82   | 76   | 64   | 18   | 1.98E-5 | > 1.00E-4 | > 1.00E-4 |
| HOP-62                            | 0.707               | 1.884                  | 1.763 | 1.403 | 1.248 | 1.150 | 0.673 | 90             | 59   | 46   | 38   | -5   | 4.91E-7 | > 1.00E-4 | > 1.00E-4 |
| HOP-92                            | 1.244               | 1.989                  | 1.964 | 1.549 | 1.508 | 1.514 | 1.286 | 97             | 41   | 35   | 36   | 6    | 6.86E-8 | > 1.00E-4 | > 1.00E-4 |
| NCI-H226                          | 0.822               | 1.486                  | 1.448 | 0.917 | 0.830 | 0.857 | 0.632 | 94             | 14   | 1    | 5    | -23  | 3.58E-8 | 1.52E-5   | > 1.00E-4 |
| NCI-H23                           | 0.419               | 1.346                  | 1.361 | 0.662 | 0.619 | 0.595 | 0.276 | 102            | 26   | 22   | 19   | -34  | 4.83E-8 | 2.27E-5   | > 1.00E-4 |
| NCI-H322M                         | 0.810               | 2.085                  | 2.098 | 1.550 | 1.219 | 1.213 | 0.851 | 101            | 58   | 32   | 32   | 3    | 2.04E-7 | > 1.00E-4 | > 1.00E-4 |
| NCI-H460                          | 0.323               | 3.049                  | 3.104 | 2.115 | 0.463 | 0.450 | 0.233 | 102            | 66   | 5    | 5    | -28  | 1.82E-7 | 1.39E-5   | > 1.00E-4 |
| NCI-H522                          | 1.038               | 2.400                  | 2.153 | 0.733 | 0.700 | 0.776 | 0.441 | 82             | -29  | -33  | -25  | -58  | 1.93E-8 | 5.44E-8   | 5.85E-5   |
| <b>Colon Cancer</b>               |                     |                        |       |       |       |       |       |                |      |      |      |      |         |           |           |
| COLO 205                          | 0.628               | 2.492                  | 2.602 | 2.473 | 0.158 | 0.224 | 0.070 | 106            | 99   | -75  | -64  | -89  | 1.91E-7 | 3.71E-7   | 7.19E-7   |
| HCC-2998                          | 0.495               | 1.553                  | 1.609 | 1.420 | 0.688 | 0.699 | 0.456 | 105            | 87   | 18   | 19   | -8   | 3.48E-7 | 5.12E-5   | > 1.00E-4 |
| HCT-116                           | 0.226               | 2.512                  | 2.407 | 0.476 | 0.365 | 0.328 | 0.259 | 95             | 11   | 6    | 4    | 1    | 3.45E-8 | > 1.00E-4 | > 1.00E-4 |
| HCT-15                            | 0.217               | 1.485                  | 1.458 | 0.692 | 0.269 | 0.304 | 0.123 | 98             | 37   | 4    | 7    | -44  | 6.20E-8 | 1.37E-5   | > 1.00E-4 |
| HT29                              | 0.373               | 2.406                  | 2.469 | 0.548 | 0.411 | 0.425 | 0.245 | 103            | 9    | 2    | 3    | -34  | 3.64E-8 | 1.17E-5   | > 1.00E-4 |
| KM12                              | 0.833               | 3.378                  | 3.356 | 2.648 | 1.326 | 1.277 | 0.927 | 99             | 71   | 19   | 17   | 4    | 2.57E-7 | > 1.00E-4 | > 1.00E-4 |
| SW-620                            | 0.333               | 2.526                  | 2.503 | 1.073 | 0.836 | 0.927 | 0.556 | 99             | 34   | 23   | 27   | 10   | 5.63E-8 | > 1.00E-4 | > 1.00E-4 |
| <b>CNS Cancer</b>                 |                     |                        |       |       |       |       |       |                |      |      |      |      |         |           |           |
| SF-268                            | 1.079               | 2.945                  | 2.922 | 2.184 | 1.958 | 1.841 | 1.524 | 99             | 59   | 47   | 41   | 24   | 5.78E-7 | > 1.00E-4 | > 1.00E-4 |
| SF-295                            | 0.472               | 1.993                  | 1.896 | 0.686 | 0.631 | 0.611 | 0.309 | 94             | 14   | 10   | 9    | -35  | 3.53E-8 | 1.62E-5   | > 1.00E-4 |
| SF-539                            | 0.563               | 1.927                  | 1.908 | 0.486 | 0.488 | 0.558 | 0.131 | 99             | -14  | -13  | 0    | -77  | 2.71E-8 | 7.54E-8   | 4.43E-5   |
| SNB-19                            | 0.527               | 1.904                  | 1.891 | 1.435 | 0.787 | 0.878 | 0.521 | 99             | 66   | 19   | 25   | -1   | 2.18E-7 | 9.06E-5   | > 1.00E-4 |
| SNB-75                            | 2.216               | 3.116                  | 3.013 | 2.544 | 2.398 | 2.317 | 1.555 | 89             | 36   | 20   | 11   | -30  | 5.49E-8 | 1.87E-5   | > 1.00E-4 |
| U251                              | 0.581               | 2.791                  | 2.725 | 2.131 | 0.783 | 0.918 | 0.604 | 97             | 70   | 9    | 15   | 1    | 2.14E-7 | > 1.00E-4 | > 1.00E-4 |
| <b>Melanoma</b>                   |                     |                        |       |       |       |       |       |                |      |      |      |      |         |           |           |
| MALME-3M                          | 0.726               | 1.561                  | 1.511 | 0.988 | 1.018 | 1.105 | 0.581 | 94             | 31   | 35   | 45   | -20  | 5.05E-8 | 4.94E-5   | > 1.00E-4 |
| M14                               | 0.470               | 2.096                  | 2.086 | 1.017 | 0.928 | 1.001 | 0.801 | 99             | 34   | 28   | 33   | 20   | 5.64E-8 | > 1.00E-4 | > 1.00E-4 |
| MDA-MB-435                        | 0.779               | 3.129                  | 3.114 | 0.601 | 0.448 | 0.576 | 0.427 | 99             | -23  | -42  | -26  | -45  | 2.53E-8 | 6.50E-8   | > 1.00E-4 |
| SK-MEL-2                          | 1.232               | 2.632                  | 2.536 | 1.521 | 1.512 | 1.469 | 0.920 | 93             | 21   | 20   | 17   | -25  | 3.93E-8 | 2.51E-5   | > 1.00E-4 |
| SK-MEL-28                         | 0.523               | 1.765                  | 1.774 | 1.119 | 1.102 | 0.961 | 0.533 | 101            | 48   | 47   | 35   | 1    | 9.16E-8 | > 1.00E-4 | > 1.00E-4 |
| SK-MEL-5                          | 0.840               | 2.710                  | 2.673 | 1.285 | 0.507 | 0.511 | 0.160 | 98             | 31   | -21  | -20  | -75  | 5.23E-8 | 3.97E-7   | 3.50E-5   |
| UACC-257                          | 0.948               | 2.554                  | 2.450 | 1.677 | 1.641 | 1.563 | 1.116 | 94             | 45   | 43   | 38   | 10   | 8.03E-8 | > 1.00E-4 | > 1.00E-4 |
| UACC-62                           | 0.837               | 2.910                  | 2.796 | 1.417 | 1.609 | 1.303 | 0.581 | 95             | 28   | 37   | 22   | -31  | 4.67E-8 | 2.65E-5   | > 1.00E-4 |
| <b>Ovarian Cancer</b>             |                     |                        |       |       |       |       |       |                |      |      |      |      |         |           |           |
| IGROV1                            | 0.501               | 2.240                  | 2.268 | 0.763 | 0.709 | 0.717 | 0.253 | 102            | 15   | 12   | 12   | -50  | 3.95E-8 | 1.58E-5   | > 1.00E-4 |
| OVCAR-3                           | 1.057               | 2.855                  | 2.959 | 1.597 | 0.964 | 1.118 | 0.491 | 106            | 30   | -9   | 3    | -54  | 5.45E-8 |           | 8.66E-5   |
| OVCAR-4                           | 0.841               | 1.989                  | 2.002 | 1.296 | 1.236 | 1.156 | 0.725 | 101            | 40   | 34   | 27   | -14  | 6.78E-8 | 4.62E-5   | > 1.00E-4 |
| OVCAR-5                           | 0.567               | 1.826                  | 1.778 | 0.958 | 0.848 | 0.881 | 0.602 | 96             | 31   | 22   | 25   | 3    | 5.11E-8 | > 1.00E-4 | > 1.00E-4 |
| OVCAR-8                           | 0.512               | 2.614                  | 2.586 | 0.583 | 0.497 | 0.507 | 0.382 | 99             | 3    | -3   | 0    | -25  | 3.24E-8 | 3.37E-7   | > 1.00E-4 |
| NCI/ADR-RES                       | 0.370               | 1.338                  | 1.348 | 0.542 | 0.568 | 0.577 | 0.365 | 101            | 18   | 20   | 21   | -1   | 4.10E-8 | 8.61E-5   | > 1.00E-4 |
| SK-OV-3                           | 0.967               | 1.800                  | 1.856 | 1.324 | 1.222 | 1.331 | 0.965 | 107            | 43   | 31   | 44   | 0    | 7.71E-8 | 9.89E-5   | > 1.00E-4 |
| <b>Renal Cancer</b>               |                     |                        |       |       |       |       |       |                |      |      |      |      |         |           |           |
| 786-0                             | 0.578               | 2.492                  | 2.421 | 1.273 | 1.090 | 0.948 | 0.778 | 96             | 36   | 27   | 19   | 10   | 5.91E-8 | > 1.00E-4 | > 1.00E-4 |
| A498                              | 1.326               | 2.133                  | 2.133 | 2.058 | 2.131 | 1.860 | 1.466 | 100            | 91   | 100  | 66   | 17   | 2.14E-5 | > 1.00E-4 | > 1.00E-4 |
| ACHN                              | 0.286               | 1.240                  | 1.249 | 0.618 | 0.551 | 0.487 | 0.211 | 101            | 35   | 28   | 21   | -26  | 5.89E-8 | 2.78E-5   | > 1.00E-4 |
| CAKI-1                            | 0.680               | 2.290                  | 2.230 | 1.271 | 1.083 | 1.084 | 0.521 | 96             | 37   | 25   | 25   | -23  | 5.98E-8 | 3.29E-5   | > 1.00E-4 |
| RXF 393                           | 0.651               | 1.203                  | 1.220 | 0.926 | 0.957 | 0.883 | 0.468 | 103            | 50   | 55   | 42   | -28  |         | 3.97E-5   | > 1.00E-4 |
| SN12C                             | 0.520               | 2.030                  | 2.036 | 0.863 | 0.762 | 0.679 | 0.354 | 100            | 23   | 16   | 11   | -32  | 4.45E-8 | 1.77E-5   | > 1.00E-4 |
| TK-10                             | 1.216               | 2.105                  | 1.981 | 1.948 | 1.957 | 1.748 | 0.975 | 86             | 82   | 83   | 60   | -20  | 1.33E-5 | 5.63E-5   | > 1.00E-4 |
| UO-31                             | 0.500               | 2.239                  | 2.134 | 1.181 | 1.033 | 0.964 | 0.563 | 94             | 39   | 31   | 27   | 4    | 6.34E-8 | > 1.00E-4 | > 1.00E-4 |
| <b>Prostate Cancer</b>            |                     |                        |       |       |       |       |       |                |      |      |      |      |         |           |           |
| PC-3                              | 0.628               | 2.254                  | 2.242 | 1.500 | 0.927 | 0.868 | 0.618 | 99             | 54   | 18   | 15   | -2   | 1.27E-7 | 7.99E-5   | > 1.00E-4 |
| DU-145                            | 0.333               | 1.692                  | 1.789 | 0.686 | 0.531 | 0.549 | 0.330 | 107            | 26   | 15   | 16   | 0    | 5.05E-8 | 8.84E-5   | > 1.00E-4 |
| <b>Breast Cancer</b>              |                     |                        |       |       |       |       |       |                |      |      |      |      |         |           |           |
| MCF7                              | 0.186               | 0.973                  | 0.921 | 0.327 | 0.252 | 0.215 | 0.074 | 93             | 18   | 8    | 4    | -60  | 3.76E-8 | 1.14E-5   | 6.86E-5   |
| MDA-MB-231/ATCC                   | 0.554               | 1.455                  | 1.486 | 0.510 | 0.508 | 0.593 | 0.443 | 103            | -8   | -8   | 4    | -20  | 3.02E-8 |           | > 1.00E-4 |
| HS 578T                           | 1.525               | 2.787                  | 2.704 | 2.328 | 2.231 | 2.101 | 1.574 | 93             | 64   | 56   | 46   | 4    | 3.77E-6 | > 1.00E-4 | > 1.00E-4 |
| BT-549                            | 1.016               | 2.086                  | 2.094 | 0.939 | 0.822 | 0.891 | 0.870 | 101            | -8   | -19  | -12  | -14  | 2.94E-8 | 8.50E-8   | > 1.00E-4 |
| T-47D                             | 1.368               | 3.177                  | 3.079 | 2.528 | 2.648 | 2.103 | 1.733 | 95             | 64   | 71   | 41   | 20   | 4.89E-6 | > 1.00E-4 | > 1.00E-4 |
| MDA-MB-468                        | 0.702               | 1.312                  | 1.307 | 0.790 | 0.776 | 0.786 | 0.504 | 99             | 14   | 12   | 14   | -28  | 3.80E-8 | 2.12E-5   | > 1.00E-4 |

# Compound 6i

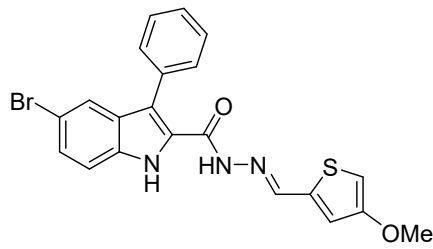

National Cancer Institute Developmental Therapeutics Program  
Dose Response Curves

NSC: D - 837015 / 1  
Report Date: October 31, 2022

SSPL: 1BCH  
EXP. ID: 2208RS46  
Test Date: August 29, 2022

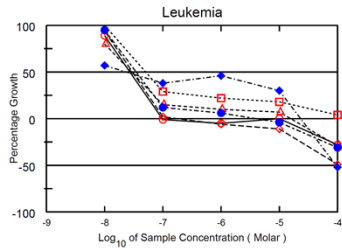

CCR6-CEM  
MOLT-4  
HL-60(TB)  
RPMI-8226  
K-562  
SR

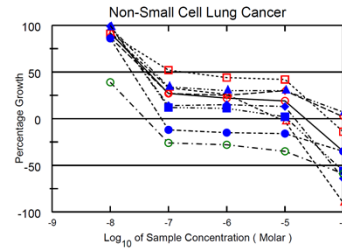

A549/ATCC  
HOP-92  
NCI-H322M  
EKVX  
NCI-H226  
NCI-H460  
HOP-62  
NCI-H23  
NCI-H522

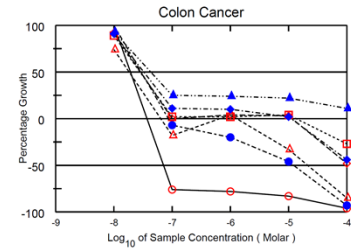

COLO 205  
HCT-15  
SW-620  
HCC-2998  
HT29  
HCT-116  
KM12

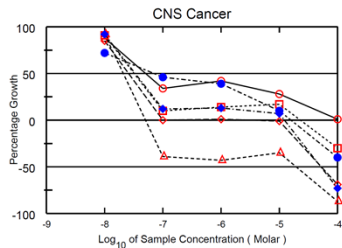

SF-268  
SNB-19  
SF-295  
SNB-75  
SF-539  
U251

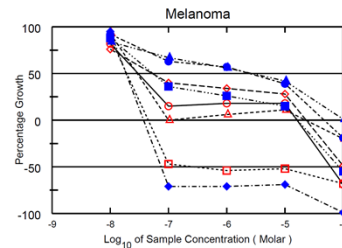

LOX IMVI  
MDA-MB-435  
UACC-257  
MALME-3M  
SK-MEL-28  
UACC-62  
M14  
SK-MEL-5

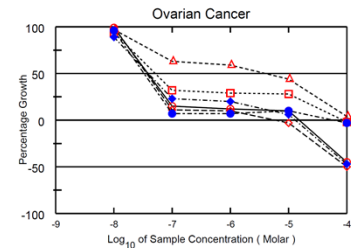

IGROV1  
OVCAR-5  
OVCAR-3  
OVCAR-8  
OVCAR-4  
SK-OV-3

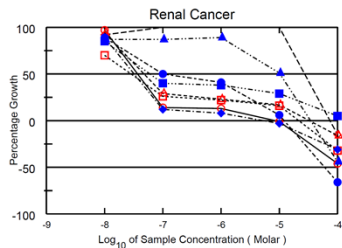

786-0  
CAKI-1  
TK-10  
A498  
RXF 393  
UO-31  
ACHN  
SN12C

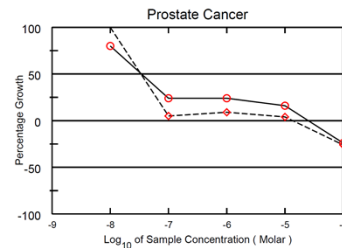

PC-3  
DU-145

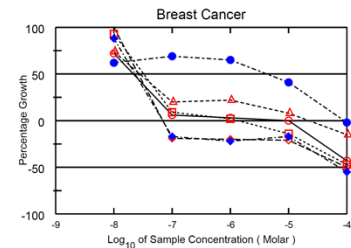

MCF7  
BT-549  
MDA-MB-231  
T-47D  
HS 578T  
MDA-MB-468



## National Cancer Institute Developmental Therapeutics Program In-Vitro Testing Results

|                                |                                       |                |               |
|--------------------------------|---------------------------------------|----------------|---------------|
| NSC : D - 837015 / 1           | Experiment ID : 2208RS46              | Test Type : 08 | Units : Molar |
| Report Date : October 31, 2022 | Test Date : August 29, 2022           | QNS :          | MC :          |
| COMI : TO23                    | Stain Reagent : SRB Dual-Pass Related | SSPL : 1BCH    |               |

| Panel/Cell Line                   | Time Zero | Log10 Concentration |       |       |       |       |       |      | Percent Growth |      |      |      |           | GI50      | TGI       | LC50 |
|-----------------------------------|-----------|---------------------|-------|-------|-------|-------|-------|------|----------------|------|------|------|-----------|-----------|-----------|------|
|                                   |           | Ctrl                | -8.0  | -7.0  | -6.0  | -5.0  | -4.0  | -8.0 | -7.0           | -6.0 | -5.0 | -4.0 |           |           |           |      |
| <b>Leukemia</b>                   |           |                     |       |       |       |       |       |      |                |      |      |      |           |           |           |      |
| CCRF-CEM                          | 0.553     | 1.672               | 1.549 | 0.547 | 0.528 | 0.548 | 0.398 | 89   | -1             | -5   | 0    | -28  | 2.71E-8   | 9.70E-8   | > 1.00E-4 |      |
| HL-60(TB)                         | 0.546     | 1.820               | 1.745 | 0.574 | 0.512 | 0.485 | 0.277 | 94   | 2              | -6   | -11  | -49  | 3.02E-8   | 1.80E-7   | > 1.00E-4 |      |
| K-562                             | 0.179     | 1.850               | 1.510 | 0.431 | 0.352 | 0.299 | 0.128 | 80   | 15             | 10   | 7    | -29  | 2.88E-8   | 1.58E-5   | > 1.00E-4 |      |
| MOLT-4                            | 0.467     | 1.948               | 2.048 | 0.897 | 0.800 | 0.730 | 0.530 | 107  | 29             | 22   | 18   | 4    | 5.37E-8   | > 1.00E-4 | > 1.00E-4 |      |
| RPMI-8226                         | 0.800     | 2.566               | 2.475 | 1.017 | 0.903 | 0.770 | 0.556 | 95   | 12             | 6    | -4   | -31  | 3.49E-8   | 4.06E-6   | > 1.00E-4 |      |
| SR                                | 0.162     | 0.591               | 0.406 | 0.326 | 0.360 | 0.292 | 0.078 | 57   | 38             | 46   | 30   | -52  | 2.35E-8   | 2.33E-5   | 9.49E-5   |      |
| <b>Non-Small Cell Lung Cancer</b> |           |                     |       |       |       |       |       |      |                |      |      |      |           |           |           |      |
| A549(ATCC)                        | 0.325     | 2.673               | 2.481 | 0.961 | 0.848 | 0.773 | 0.211 | 92   | 27             | 22   | 19   | -35  | 4.43E-8   | 2.24E-5   | > 1.00E-4 |      |
| EKVX                              | 0.567     | 1.556               | 1.430 | 0.834 | 0.811 | 0.862 | 0.588 | 87   | 27             | 25   | 30   | 2    | 4.14E-8   | > 1.00E-4 | > 1.00E-4 |      |
| HOP-62                            | 0.661     | 2.022               | 1.904 | 1.110 | 1.021 | 0.644 | 0.069 | 91   | 33             | 26   | -3   | -90  | 5.11E-8   | 8.15E-6   | 3.51E-5   |      |
| HOP-92                            | 1.060     | 1.609               | 1.559 | 1.347 | 1.302 | 1.290 | 0.916 | 91   | 52             | 44   | 42   | -14  | 1.88E-7   | 5.69E-5   | > 1.00E-4 |      |
| NCI-H226                          | 0.764     | 1.324               | 1.244 | 0.671 | 0.651 | 0.645 | 0.500 | 86   | -12            | -15  | -16  | -35  | 2.31E-8   | 7.51E-8   | > 1.00E-4 |      |
| NCI-H23                           | 0.445     | 1.449               | 1.440 | 0.590 | 0.592 | 0.573 | 0.160 | 99   | 14             | 15   | 13   | -64  | 3.80E-8   | 1.46E-5   | 6.56E-5   |      |
| NCI-H322M                         | 0.809     | 1.984               | 1.957 | 1.211 | 1.163 | 1.163 | 0.887 | 98   | 34             | 30   | 30   | 7    | 5.64E-8   | > 1.00E-4 | > 1.00E-4 |      |
| NCI-H460                          | 0.233     | 2.707               | 2.718 | 0.520 | 0.499 | 0.288 | 0.103 | 100  | 12             | 11   | 2    | -56  | 3.70E-8   | 1.09E-5   | 7.95E-5   |      |
| NCI-H522                          | 1.421     | 3.135               | 2.089 | 1.054 | 1.018 | 0.923 | 0.586 | 39   | -26            | -28  | -35  | -59  | < 1.00E-8 | 3.99E-8   | 4.26E-5   |      |
| <b>Colon Cancer</b>               |           |                     |       |       |       |       |       |      |                |      |      |      |           |           |           |      |
| COLO 205                          | 0.548     | 1.867               | 1.862 | 0.130 | 0.121 | 0.095 | 0.022 | 100  | -76            | -78  | -83  | -96  | 1.91E-8   | 3.68E-8   | 7.08E-8   |      |
| HCC-2998                          | 0.493     | 1.969               | 1.851 | 0.496 | 0.550 | 0.533 | 0.255 | 92   | 0              | 4    | 3    | -48  | 2.87E-8   | 1.13E-5   | > 1.00E-4 |      |
| HCT-116                           | 0.256     | 1.859               | 1.449 | 0.209 | 0.321 | 0.172 | 0.039 | 74   | -18            | 4    | -33  | -85  | 1.83E-8   | .         | 2.13E-5   |      |
| HCT-15                            | 0.301     | 1.997               | 1.805 | 0.337 | 0.327 | 0.366 | 0.219 | 89   | 2              | 2    | 4    | -27  | 2.80E-8   | 1.33E-5   | > 1.00E-4 |      |
| HT29                              | 0.284     | 1.677               | 1.713 | 0.265 | 0.227 | 0.152 | 0.019 | 103  | -7             | -20  | -46  | -93  | 3.03E-8   | 8.68E-8   | 1.19E-5   |      |
| KM12                              | 0.636     | 2.762               | 2.561 | 0.871 | 0.849 | 0.680 | 0.355 | 91   | 11             | 10   | 2    | -44  | 3.23E-8   | 1.11E-5   | > 1.00E-4 |      |
| SW-620                            | 0.303     | 2.558               | 2.411 | 0.861 | 0.837 | 0.791 | 0.541 | 93   | 25             | 24   | 22   | 11   | 4.29E-8   | > 1.00E-4 | > 1.00E-4 |      |
| <b>CNS Cancer</b>                 |           |                     |       |       |       |       |       |      |                |      |      |      |           |           |           |      |
| SF-268                            | 0.975     | 2.607               | 2.418 | 1.525 | 1.654 | 1.429 | 0.994 | 88   | 34             | 42   | 28   | 1    | 5.04E-8   | > 1.00E-4 | > 1.00E-4 |      |
| SF-295                            | 0.553     | 2.074               | 1.840 | 0.560 | 0.573 | 0.546 | 0.174 | 85   | 0              | 1    | -1   | -69  | 2.58E-8   | 3.19E-6   | 5.30E-5   |      |
| SF-539                            | 0.717     | 2.044               | 1.941 | 0.435 | 0.410 | 0.463 | 0.094 | 92   | -39            | -43  | -35  | -87  | 2.09E-8   | 5.02E-8   | 1.91E-5   |      |
| SNB-19                            | 0.698     | 2.088               | 1.968 | 0.841 | 0.891 | 0.933 | 0.490 | 91   | 10             | 14   | 17   | -30  | 3.24E-8   | 2.30E-5   | > 1.00E-4 |      |
| SNB-75                            | 1.462     | 2.384               | 2.127 | 1.884 | 1.823 | 1.553 | 0.883 | 72   | 46             | 39   | 10   | -40  | 6.89E-8   | 1.58E-5   | > 1.00E-4 |      |
| U251                              | 0.218     | 1.640               | 1.520 | 0.383 | 0.401 | 0.315 | 0.059 | 92   | 12             | 13   | 7    | -73  | 3.31E-8   | 1.22E-5   | 5.13E-5   |      |
| <b>Melanoma</b>                   |           |                     |       |       |       |       |       |      |                |      |      |      |           |           |           |      |
| LOX IMVI                          | 0.237     | 1.570               | 1.326 | 0.431 | 0.471 | 0.484 | 0.073 | 82   | 15             | 18   | 18   | -69  | 2.96E-8   | 1.62E-5   | 6.04E-5   |      |
| MALME-3M                          | 0.748     | 1.353               | 1.208 | 0.989 | 0.953 | 0.918 | 0.379 | 76   | 40             | 34   | 28   | -49  | 5.22E-8   | 2.30E-5   | > 1.00E-4 |      |
| M14                               | 0.527     | 1.781               | 1.696 | 0.532 | 0.596 | 0.666 | 0.420 | 93   | 0              | 6    | 11   | -20  | 2.92E-8   | 2.25E-5   | > 1.00E-4 |      |
| MDA-MB-435                        | 0.487     | 2.324               | 2.101 | 0.257 | 0.225 | 0.234 | 0.156 | 88   | -47            | -54  | -52  | -68  | 1.91E-8   | 4.47E-8   | 2.59E-7   |      |
| SK-MEL-28                         | 0.680     | 1.816               | 1.722 | 1.394 | 1.330 | 1.126 | 0.550 | 92   | 63             | 57   | 39   | -19  | 2.53E-6   | 4.71E-5   | > 1.00E-4 |      |
| SK-MEL-5                          | 0.802     | 3.133               | 3.010 | 0.234 | 0.236 | 0.246 | 0.008 | 95   | -71            | -71  | -69  | -99  | 1.86E-8   | 3.73E-8   | 7.49E-8   |      |
| UACC-257                          | 0.522     | 2.287               | 2.009 | 1.699 | 1.503 | 1.272 | 0.542 | 84   | 67             | 56   | 42   | 1    | 2.66E-8   | > 1.00E-4 | > 1.00E-4 |      |
| UACC-62                           | 1.153     | 2.696               | 2.510 | 1.701 | 1.557 | 1.381 | 0.519 | 88   | 36             | 26   | 15   | -55  | 5.29E-8   | 1.63E-5   | 8.47E-5   |      |
| <b>Ovarian Cancer</b>             |           |                     |       |       |       |       |       |      |                |      |      |      |           |           |           |      |
| IGROV1                            | 0.680     | 2.339               | 2.315 | 0.926 | 0.876 | 0.849 | 0.375 | 99   | 15             | 12   | 10   | -45  | 3.80E-8   | 1.53E-5   | > 1.00E-4 |      |
| OVCAR-3                           | 0.478     | 1.650               | 1.661 | 0.606 | 0.596 | 0.464 | 0.241 | 101  | 11             | 10   | -3   | -50  | 3.68E-8   | 5.87E-6   | > 1.00E-4 |      |
| OVCAR-4                           | 0.635     | 1.635               | 1.602 | 1.267 | 1.228 | 1.071 | 0.677 | 97   | 63             | 59   | 44   | 4    | 3.90E-6   | > 1.00E-4 | > 1.00E-4 |      |
| OVCAR-5                           | 0.814     | 1.548               | 1.502 | 1.047 | 1.026 | 1.020 | 0.800 | 94   | 32             | 29   | 28   | -2   | 5.08E-8   | 8.72E-5   | > 1.00E-4 |      |
| OVCAR-8                           | 0.297     | 2.371               | 2.294 | 0.450 | 0.442 | 0.504 | 0.290 | 96   | 7              | 7    | 10   | -3   | 3.31E-8   | 6.28E-5   | > 1.00E-4 |      |
| SK-OV-3                           | 1.133     | 2.119               | 2.010 | 1.365 | 1.332 | 1.189 | 0.605 | 89   | 23             | 20   | 6    | -47  | 3.93E-8   | 1.28E-5   | > 1.00E-4 |      |
| <b>Renal Cancer</b>               |           |                     |       |       |       |       |       |      |                |      |      |      |           |           |           |      |
| 786-0                             | 0.827     | 2.588               | 2.529 | 1.075 | 1.060 | 0.816 | 0.445 | 97   | 14             | 13   | -1   | -46  | 3.67E-8   | 8.03E-6   | > 1.00E-4 |      |
| A498                              | 1.575     | 2.228               | 2.174 | 2.415 | 2.377 | 2.246 | 1.347 | 92   | 129            | 123  | 103  | -15  | 2.82E-5   | 7.52E-5   | > 1.00E-4 |      |
| ACHN                              | 0.493     | 1.954               | 1.867 | 0.923 | 0.827 | 0.746 | 0.412 | 94   | 29             | 23   | 17   | -16  | 4.80E-8   | 3.26E-5   | > 1.00E-4 |      |
| CAKI-1                            | 0.761     | 2.605               | 2.060 | 1.238 | 1.174 | 1.064 | 0.515 | 70   | 26             | 22   | 16   | -32  | 2.87E-8   | 2.17E-5   | > 1.00E-4 |      |
| RXF 393                           | 0.978     | 1.513               | 1.456 | 1.243 | 1.199 | 1.009 | 0.333 | 89   | 50             | 41   | 6    | -66  | 9.75E-8   | 1.20E-5   | 5.98E-5   |      |
| SN12C                             | 0.714     | 2.467               | 2.272 | 0.921 | 0.853 | 0.690 | 0.494 | 89   | 12             | 8    | -3   | -31  | 3.20E-8   | 5.03E-6   | > 1.00E-4 |      |
| TK-10                             | 1.630     | 2.626               | 2.493 | 2.494 | 2.517 | 2.138 | 0.908 | 87   | 87             | 89   | 51   | -44  | 1.03E-5   | 3.43E-5   | > 1.00E-4 |      |
| UO-31                             | 0.829     | 2.219               | 2.010 | 1.387 | 1.355 | 1.230 | 0.899 | 85   | 40             | 38   | 29   | 5    | 6.02E-8   | > 1.00E-4 | > 1.00E-4 |      |
| <b>Prostate Cancer</b>            |           |                     |       |       |       |       |       |      |                |      |      |      |           |           |           |      |
| PC-3                              | 0.606     | 1.720               | 1.498 | 0.871 | 0.872 | 0.784 | 0.462 | 80   | 24             | 24   | 16   | -24  | 3.42E-8   | 2.51E-5   | > 1.00E-4 |      |
| DU-145                            | 0.268     | 1.220               | 1.225 | 0.320 | 0.355 | 0.302 | 0.199 | 101  | 5              | 9    | 4    | -26  | 3.40E-8   | 1.32E-5   | > 1.00E-4 |      |
| <b>Breast Cancer</b>              |           |                     |       |       |       |       |       |      |                |      |      |      |           |           |           |      |
| MCF7                              | 0.350     | 1.850               | 1.437 | 0.438 | 0.395 | 0.348 | 0.200 | 72   | 6              | 3    | 0    | -43  | 2.17E-8   | 6.92E-6   | > 1.00E-4 |      |
| MDA-MB-231(ATCC)                  | 0.612     | 1.241               | 1.243 | 0.496 | 0.487 | 0.481 | 0.309 | 100  | -19            | -20  | -21  | -50  | 2.64E-8   | 6.93E-8   | > 1.00E-4 |      |
| HS 578T                           | 1.388     | 2.541               | 2.237 | 1.616 | 1.645 | 1.482 | 1.177 | 74   | 20             | 22   | 8    | -15  | 2.75E-8   | 2.23E-5   | > 1.00E-4 |      |
| BT-549                            | 1.283     | 2.094               | 2.035 | 1.355 | 1.301 | 1.108 | 0.676 | 93   | 9              | 2    | -14  | -47  | 3.23E-8   | 1.38E-6   | > 1.00E-4 |      |
| T-47D                             | 1.359     | 2.915               | 2.330 | 2.436 | 2.364 | 2.000 | 1.338 | 62   | 69             | 65   | 41   | -2   | 4.19E-6   | 9.18E-5   | > 1.00E-4 |      |
| MDA-MB-468                        | 0.549     | 1.067               | 1.006 | 0.454 | 0.431 | 0.456 | 0.245 | 88   | -17            | -22  | -17  | -55  | 2.30E-8   | 6.85E-8   | 7.24E-5   |      |

# Compound 6j

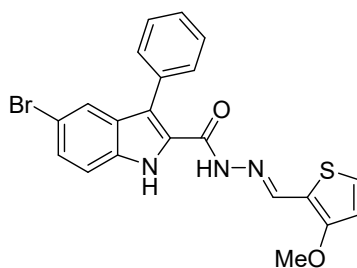

National Cancer Institute Developmental Therapeutics Program  
Dose Response Curves

NSC: D - 837016 / 1

Report Date: August 09, 2022

SSPL: 1BCH

EXP. ID: 2206NS36

Test Date: June 13, 2022

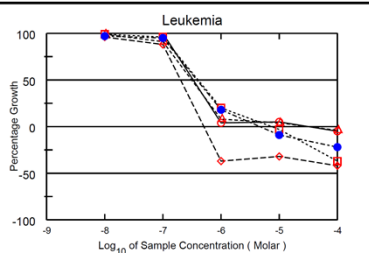

CCR6-CEM  
MOLT-4  
HL-60(TB)  
RPMI-8226  
K-562

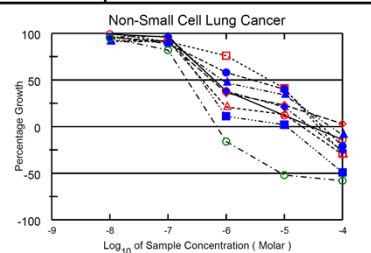

A549/ATCC  
HOP-92  
NCI-H322M  
EKVX  
NCI-H226  
NCI-H460  
HOP-62  
NCI-H23  
NCI-H522

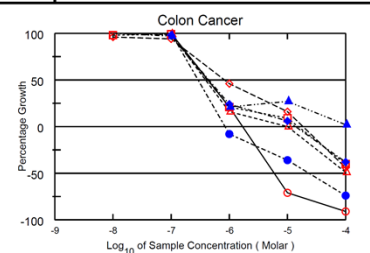

COLO 205  
HCT-15  
SW-620  
HCC-2998  
HT29  
HCT-116  
KM12

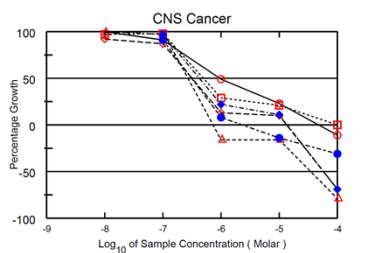

SF-288  
SNB-19  
SF-295  
SNB-75  
SF-539  
U251

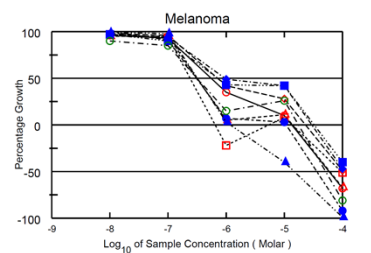

LOX IMVI  
MDA-MB-435  
SK-MEL-5  
MALME-3M  
SK-MEL-2  
UACC-257  
M14  
SK-MEL-28  
UACC-62

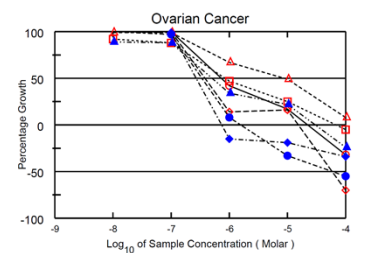

IGROV1  
OVCAR-5  
SK-OV-3  
OVCAR-3  
OVCAR-8  
NCI/ADR-RES  
OVCAR-4

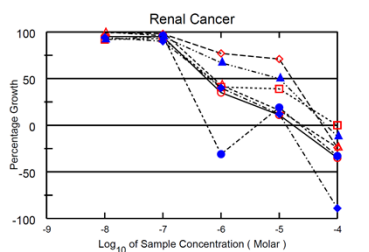

786-0  
CAKI-1  
TK-10  
A498  
RXF 393  
ACHN  
SN12C

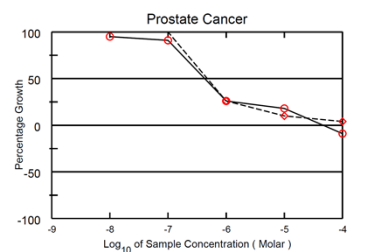

PC-3  
DU-145

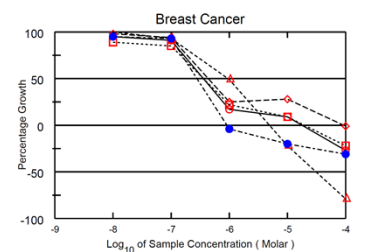

MCF7  
T-47D  
HS 578T  
MDA-MB-468  
BT-549

## National Cancer Institute Developmental Therapeutics Program In-Vitro Testing Results

| NSC : D - 837016 / 1              |           | Experiment ID : 2206NS36              |       |       |       |       | Test Type : 08 |                |      |      |      | Units : Molar |         |           |           |  |
|-----------------------------------|-----------|---------------------------------------|-------|-------|-------|-------|----------------|----------------|------|------|------|---------------|---------|-----------|-----------|--|
| Report Date : August 09, 2022     |           | Test Date : June 13, 2022             |       |       |       |       | QNS :          |                |      |      |      | MC :          |         |           |           |  |
| COMI : TO24                       |           | Stain Reagent : SRB Dual-Pass Related |       |       |       |       | SSPL : 1BCH    |                |      |      |      |               |         |           |           |  |
| Panel/Cell Line                   | Time Zero | Log10 Concentration                   |       |       |       |       |                | Percent Growth |      |      |      |               | GI50    | TGI       | LC50      |  |
|                                   |           | Ctrl                                  | -8.0  | -7.0  | -6.0  | -5.0  | -4.0           | -8.0           | -7.0 | -6.0 | -5.0 | -4.0          |         |           |           |  |
| <b>Leukemia</b>                   |           |                                       |       |       |       |       |                |                |      |      |      |               |         |           |           |  |
| CCRF-CEM                          | 0.312     | 1.342                                 | 1.370 | 1.375 | 0.357 | 0.361 | 0.296          | 103            | 103  | 4    | 5    | -5            | 3.45E-7 | 2.98E-5   | > 1.00E-4 |  |
| HL-60(TB)                         | 0.547     | 2.586                                 | 2.500 | 2.346 | 0.343 | 0.372 | 0.319          | 96             | 88   | -37  | -32  | -42           | 2.02E-7 | 5.05E-7   | > 1.00E-4 |  |
| K-562                             | 0.189     | 1.853                                 | 1.840 | 1.703 | 0.325 | 0.262 | 0.181          | 99             | 91   | 8    | 4    | -4            | 3.12E-7 | 3.11E-5   | > 1.00E-4 |  |
| MOLT-4                            | 0.602     | 2.459                                 | 2.436 | 2.383 | 0.980 | 0.584 | 0.381          | 99             | 96   | 20   | -3   | -37           | 4.05E-7 | 7.39E-6   | > 1.00E-4 |  |
| RPMI-8226                         | 0.698     | 2.207                                 | 2.167 | 2.127 | 0.977 | 0.633 | 0.544          | 97             | 95   | 18   | -9   | -22           | 3.86E-7 | 4.62E-6   | > 1.00E-4 |  |
| <b>Non-Small Cell Lung Cancer</b> |           |                                       |       |       |       |       |                |                |      |      |      |               |         |           |           |  |
| A549/ATCC                         | 0.528     | 2.412                                 | 2.393 | 2.334 | 1.251 | 0.760 | 0.454          | 99             | 96   | 38   | 12   | -14           | 6.28E-7 | 2.93E-5   | > 1.00E-4 |  |
| EKVX                              | 0.666     | 2.113                                 | 2.050 | 1.978 | 1.182 | 1.002 | 0.705          | 96             | 91   | 36   | 23   | 3             | 5.49E-7 | > 1.00E-4 | > 1.00E-4 |  |
| HOP-62                            | 0.813     | 2.489                                 | 2.356 | 2.357 | 1.165 | 1.033 | 0.573          | 92             | 92   | 21   | 13   | -30           | 3.91E-7 | 2.03E-5   | > 1.00E-4 |  |
| HOP-92                            | 0.979     | 1.668                                 | 1.685 | 1.609 | 1.506 | 1.264 | 0.698          | 103            | 91   | 76   | 41   | -29           | 5.68E-6 | 3.89E-5   | > 1.00E-4 |  |
| NCI-H226                          | 0.679     | 1.808                                 | 1.760 | 1.685 | 1.335 | 1.134 | 0.536          | 96             | 89   | 58   | 40   | -21           | 2.85E-6 | 4.54E-5   | > 1.00E-4 |  |
| NCI-H23                           | 0.517     | 1.697                                 | 1.655 | 1.663 | 0.969 | 0.766 | 0.382          | 96             | 97   | 38   | 21   | -26           | 6.32E-7 | 2.80E-5   | > 1.00E-4 |  |
| NCI-H322M                         | 0.710     | 2.037                                 | 1.922 | 1.915 | 1.335 | 1.160 | 0.645          | 91             | 91   | 47   | 34   | -9            | 8.59E-7 | 6.11E-5   | > 1.00E-4 |  |
| NCI-H460                          | 0.286     | 2.726                                 | 2.819 | 2.833 | 0.553 | 0.336 | 0.147          | 104            | 104  | 11   | 2    | -49           | 3.82E-7 | 1.10E-5   | > 1.00E-4 |  |
| NCI-H522                          | 1.062     | 2.856                                 | 2.767 | 2.532 | 0.897 | 0.505 | 0.444          | 95             | 82   | -16  | -52  | -58           | 2.13E-7 | 6.92E-7   | 8.56E-6   |  |
| <b>Colon Cancer</b>               |           |                                       |       |       |       |       |                |                |      |      |      |               |         |           |           |  |
| COLO 205                          | 0.647     | 2.126                                 | 2.141 | 2.136 | 0.962 | 0.188 | 0.059          | 101            | 101  | 21   | -71  | -91           | 4.35E-7 | 1.70E-6   | 5.92E-6   |  |
| HCC-2998                          | 0.726     | 2.536                                 | 2.462 | 2.436 | 1.561 | 1.016 | 0.408          | 96             | 94   | 46   | 16   | -44           | 8.31E-7 | 1.85E-5   | > 1.00E-4 |  |
| HCT-116                           | 0.298     | 2.895                                 | 2.709 | 2.672 | 0.680 | 0.297 | 0.151          | 101            | 99   | 16   | 0    | -49           | 3.89E-7 | 9.32E-6   | > 1.00E-4 |  |
| HCT-15                            | 0.333     | 2.277                                 | 2.239 | 2.251 | 0.747 | 0.511 | 0.201          | 98             | 99   | 21   | 9    | -40           | 4.26E-7 | 1.54E-5   | > 1.00E-4 |  |
| HT29                              | 0.393     | 2.160                                 | 2.169 | 2.235 | 0.362 | 0.251 | 0.101          | 101            | 104  | -8   | -36  | -74           | 3.05E-7 | 8.50E-7   | 2.30E-5   |  |
| KM12                              | 0.609     | 2.919                                 | 2.921 | 2.883 | 1.168 | 0.758 | 0.377          | 100            | 98   | 24   | 6    | -38           | 4.49E-7 | 1.39E-5   | > 1.00E-4 |  |
| SW-620                            | 0.390     | 2.761                                 | 2.893 | 2.692 | 0.888 | 1.021 | 0.447          | 106            | 97   | 21   | 27   | 2             | 4.16E-7 | > 1.00E-4 | > 1.00E-4 |  |
| <b>CNS Cancer</b>                 |           |                                       |       |       |       |       |                |                |      |      |      |               |         |           |           |  |
| SF-268                            | 0.744     | 2.409                                 | 2.471 | 2.262 | 1.560 | 1.132 | 0.662          | 104            | 91   | 49   | 23   | -11           | 9.47E-7 | 4.77E-5   | > 1.00E-4 |  |
| SF-295                            | 0.622     | 2.267                                 | 2.138 | 2.049 | 0.843 | 0.788 | 0.190          | 92             | 87   | 13   | 10   | -69           | 3.17E-7 | 1.34E-5   | 5.69E-5   |  |
| SF-539                            | 0.692     | 2.187                                 | 2.176 | 2.188 | 0.584 | 0.579 | 0.145          | 99             | 100  | -16  | -16  | -79           | 2.71E-7 | 7.33E-7   | 3.44E-5   |  |
| SNB-19                            | 0.533     | 1.789                                 | 1.754 | 1.763 | 0.899 | 0.795 | 0.538          | 97             | 98   | 29   | 21   | 0             | 4.98E-7 | > 1.00E-4 | > 1.00E-4 |  |
| SNB-75                            | 2.142     | 3.144                                 | 3.162 | 3.052 | 2.221 | 1.837 | 1.470          | 102            | 91   | 8    | -14  | -31           | 3.11E-7 | 2.26E-6   | > 1.00E-4 |  |
| U251                              | 0.448     | 1.923                                 | 1.949 | 1.880 | 0.767 | 0.611 | 0.138          | 102            | 97   | 22   | 11   | -69           | 4.20E-7 | 1.37E-5   | 5.75E-5   |  |
| <b>Melanoma</b>                   |           |                                       |       |       |       |       |                |                |      |      |      |               |         |           |           |  |
| LOX IMVI                          | 0.365     | 2.032                                 | 1.972 | 1.907 | 0.953 | 0.525 | 0.117          | 96             | 93   | 35   | 10   | -68           | 5.53E-7 | 1.33E-5   | 5.85E-5   |  |
| MALME-3M                          | 0.664     | 1.609                                 | 1.588 | 1.570 | 1.059 | 0.926 | 0.337          | 98             | 96   | 42   | 28   | -49           | 7.04E-7 | 2.29E-5   | > 1.00E-4 |  |
| M14                               | 0.490     | 1.945                                 | 1.879 | 1.871 | 0.562 | 0.644 | 0.160          | 95             | 95   | 5    | 11   | -67           | 3.16E-7 | 1.37E-5   | 5.99E-5   |  |
| MDA-MB-435                        | 0.679     | 3.059                                 | 2.996 | 2.919 | 0.530 | 0.860 | 0.336          | 97             | 94   | -22  | 8    | -51           | 2.40E-7 | .         | 9.80E-5   |  |
| SK-MEL-2                          | 1.159     | 2.047                                 | 2.044 | 1.967 | 1.221 | 1.183 | 0.097          | 100            | 91   | 7    | 3    | -92           | 3.08E-7 | 1.07E-5   | 3.62E-5   |  |
| SK-MEL-28                         | 0.727     | 2.031                                 | 1.996 | 1.959 | 1.370 | 1.277 | 0.386          | 97             | 94   | 49   | 42   | -47           | 9.64E-7 | 2.97E-5   | > 1.00E-4 |  |
| SK-MEL-5                          | 0.821     | 3.046                                 | 3.030 | 3.011 | 0.881 | 0.496 | 0.008          | 99             | 98   | 3    | -40  | -99           | 3.21E-7 | 1.16E-6   | 1.54E-5   |  |
| UACC-257                          | 1.131     | 2.416                                 | 2.384 | 2.285 | 1.684 | 1.668 | 0.678          | 97             | 90   | 43   | 42   | -40           | 7.09E-7 | 3.24E-5   | > 1.00E-4 |  |
| UACC-62                           | 0.900     | 2.606                                 | 2.427 | 2.344 | 1.154 | 1.347 | 0.174          | 90             | 85   | 15   | 26   | -81           | 3.14E-7 | 1.76E-5   | 5.16E-5   |  |
| <b>Ovarian Cancer</b>             |           |                                       |       |       |       |       |                |                |      |      |      |               |         |           |           |  |
| IGROV1                            | 0.765     | 2.474                                 | 2.539 | 2.480 | 1.488 | 1.054 | 0.523          | 104            | 100  | 42   | 17   | -32           | 7.36E-7 | 2.23E-5   | > 1.00E-4 |  |
| OVCAR-3                           | 0.386     | 1.411                                 | 1.463 | 1.482 | 0.525 | 0.548 | 0.116          | 105            | 107  | 14   | 16   | -70           | 4.07E-7 | 1.53E-5   | 5.84E-5   |  |
| OVCAR-4                           | 1.052     | 2.410                                 | 2.402 | 2.392 | 1.966 | 1.721 | 1.157          | 99             | 99   | 67   | 49   | 8             | 9.09E-6 | > 1.00E-4 | > 1.00E-4 |  |
| OVCAR-5                           | 0.769     | 1.722                                 | 1.650 | 1.607 | 1.213 | 1.003 | 0.727          | 92             | 88   | 47   | 25   | -5            | 8.25E-7 | 6.57E-5   | > 1.00E-4 |  |
| OVCAR-8                           | 0.427     | 1.786                                 | 1.788 | 1.750 | 0.539 | 0.287 | 0.193          | 100            | 97   | 8    | -33  | -55           | 3.40E-7 | 1.59E-6   | 5.99E-5   |  |
| NCI/ADR-RES                       | 0.388     | 1.357                                 | 1.398 | 1.344 | 0.330 | 0.315 | 0.257          | 104            | 99   | -15  | -19  | -34           | 2.68E-7 | 7.39E-7   | > 1.00E-4 |  |
| SK-OV-3                           | 1.252     | 2.413                                 | 2.285 | 2.273 | 1.643 | 1.512 | 0.949          | 89             | 88   | 34   | 22   | -24           | 4.99E-7 | 3.02E-5   | > 1.00E-4 |  |
| <b>Renal Cancer</b>               |           |                                       |       |       |       |       |                |                |      |      |      |               |         |           |           |  |
| 786-0                             | 0.745     | 2.558                                 | 2.472 | 2.469 | 1.380 | 0.940 | 0.482          | 95             | 95   | 35   | 11   | -35           | 5.63E-7 | 1.71E-5   | > 1.00E-4 |  |
| A498                              | 1.866     | 2.639                                 | 2.688 | 2.624 | 2.459 | 2.411 | 1.424          | 106            | 98   | 77   | 71   | -24           | 1.65E-5 | 5.60E-5   | > 1.00E-4 |  |
| ACHN                              | 0.559     | 2.214                                 | 2.200 | 2.275 | 1.278 | 0.822 | 0.424          | 99             | 104  | 43   | 16   | -24           | 7.78E-7 | 2.49E-5   | > 1.00E-4 |  |
| CAKI-1                            | 0.733     | 2.885                                 | 2.712 | 2.736 | 1.622 | 1.582 | 0.740          | 92             | 93   | 41   | 39   | 0             | 6.79E-7 | > 1.00E-4 | > 1.00E-4 |  |
| RXF 393                           | 0.743     | 1.383                                 | 1.437 | 1.358 | 0.513 | 0.867 | 0.500          | 109            | 96   | -31  | 19   | -33           | 2.30E-7 | .         | > 1.00E-4 |  |
| SN12C                             | 0.731     | 2.463                                 | 2.366 | 2.284 | 1.426 | 0.945 | 0.079          | 94             | 90   | 40   | 12   | -89           | 6.32E-7 | 1.32E-5   | 4.11E-5   |  |
| TK-10                             | 1.146     | 2.150                                 | 2.071 | 2.105 | 1.823 | 1.653 | 1.011          | 92             | 95   | 67   | 50   | -12           | 1.02E-5 | 6.46E-5   | > 1.00E-4 |  |
| <b>Prostate Cancer</b>            |           |                                       |       |       |       |       |                |                |      |      |      |               |         |           |           |  |
| PC-3                              | 0.653     | 2.496                                 | 2.411 | 2.335 | 1.129 | 0.989 | 0.594          | 95             | 91   | 26   | 18   | -9            | 4.27E-7 | 4.64E-5   | > 1.00E-4 |  |
| DU-145                            | 0.439     | 1.902                                 | 2.011 | 1.925 | 0.815 | 0.589 | 0.496          | 107            | 102  | 26   | 10   | 4             | 4.78E-7 | > 1.00E-4 | > 1.00E-4 |  |
| <b>Breast Cancer</b>              |           |                                       |       |       |       |       |                |                |      |      |      |               |         |           |           |  |
| MCF7                              | 0.391     | 2.014                                 | 1.928 | 1.865 | 0.668 | 0.535 | 0.284          | 95             | 91   | 17   | 9    | -27           | 3.58E-7 | 1.76E-5   | > 1.00E-4 |  |
| HS 578T                           | 1.525     | 2.719                                 | 2.690 | 2.642 | 1.820 | 1.859 | 1.509          | 98             | 94   | 25   | 28   | -1            | 4.29E-7 | 9.20E-5   | > 1.00E-4 |  |
| BT-549                            | 1.401     | 2.562                                 | 2.572 | 2.478 | 1.976 | 1.092 | 0.298          | 101            | 93   | 49   | -22  | -79           | 9.73E-7 | 4.91E-6   | 3.11E-5   |  |
| T-47D                             | 1.345     | 2.845                                 | 2.680 | 2.619 | 1.675 | 1.484 | 1.050          | 89             | 85   | 22   | 9    | -22           | 3.59E-7 | 1.98E-5   | > 1.00E-4 |  |
| MDA-MB-468                        | 0.867     | 1.975                                 | 1.925 | 1.893 | 0.836 | 0.690 | 0.600          | 95             | 93   | -4   | -20  | -31           | 2.77E-7 | 9.18E-7   | > 1.00E-4 |  |



# Compound 6m

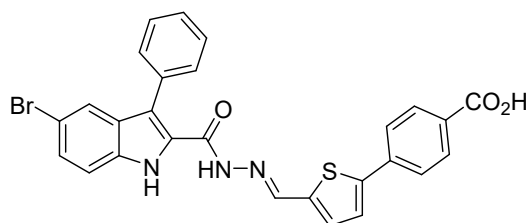

National Cancer Institute Developmental Therapeutics Program  
Dose Response Curves

NSC: D - 838302 / 1  
Report Date: December 19, 2022

SSPL: 1BCH  
EXP. ID: 2209NS56  
Test Date: September 26, 2022

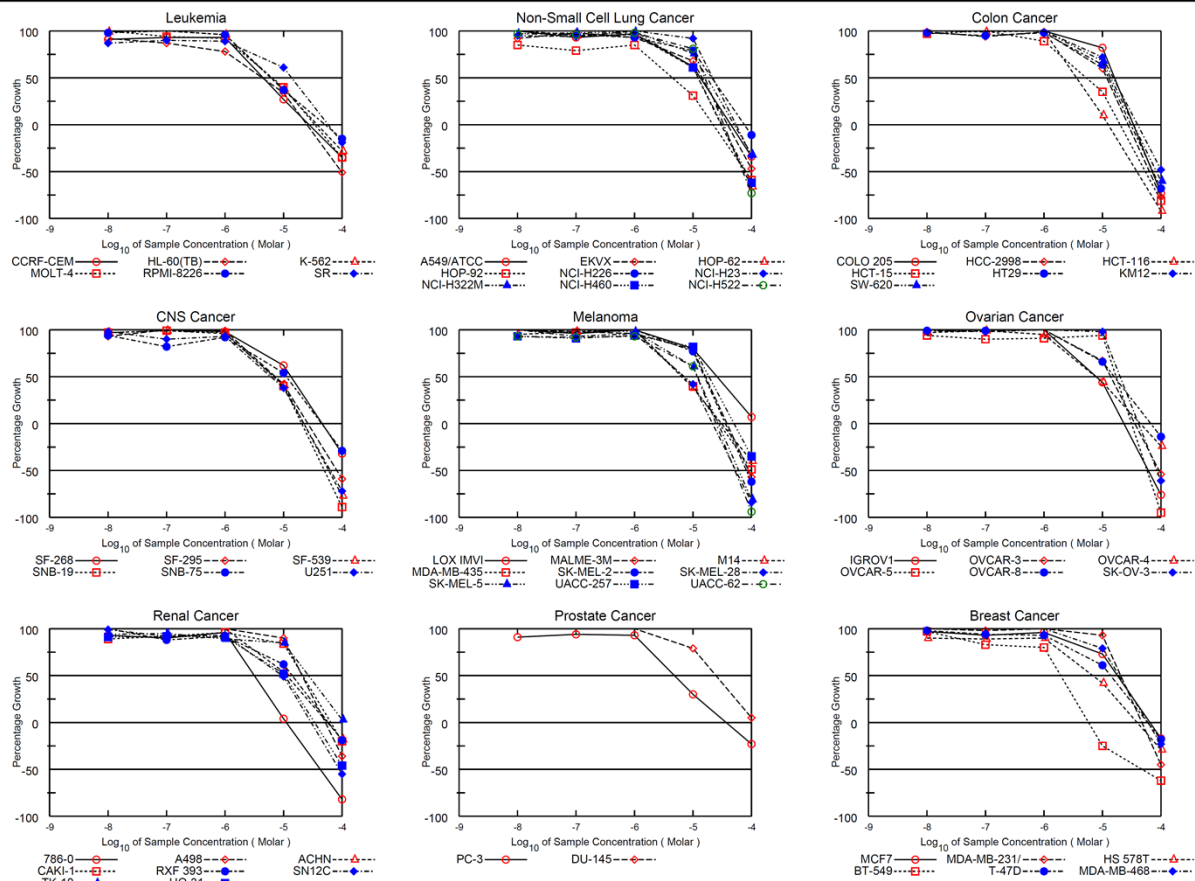

National Cancer Institute Developmental Therapeutics Program  
In-Vitro Testing Results

| NSC : D - 838302 / 1              |           | Experiment ID : 2209NS56              |       |       |       |       |       |      |      |      |      |      | Test Type : 08 |         | Units : Molar |         |         |
|-----------------------------------|-----------|---------------------------------------|-------|-------|-------|-------|-------|------|------|------|------|------|----------------|---------|---------------|---------|---------|
| Report Date : December 19, 2022   |           | Test Date : September 26, 2022        |       |       |       |       |       |      |      |      |      |      | QNS :          |         | MC :          |         |         |
| COMI : TO37                       |           | Stain Reagent : SRB Dual-Pass Related |       |       |       |       |       |      |      |      |      |      | SSPL : 1BCH    |         |               |         |         |
| Panel/Cell Line                   | Time Zero | Log10 Concentration                   |       |       |       |       |       |      |      |      |      |      | GI50           | TGI     | LC50          |         |         |
|                                   |           | Ctrl                                  | -8.0  | -7.0  | -6.0  | -5.0  | -4.0  | -8.0 | -7.0 | -6.0 | -5.0 | -4.0 |                |         |               |         |         |
| <b>Leukemia</b>                   |           |                                       |       |       |       |       |       |      |      |      |      |      |                |         |               |         |         |
| CCRF-CEM                          | 0.400     | 2.003                                 | 1.860 | 1.898 | 1.892 | 0.825 | 0.259 | 91   | 93   | 93   | 27   | -35  | 4.44E-6        | 2.69E-5 | >             | 1.00E-4 |         |
| HL-60(TB)                         | 0.429     | 1.804                                 | 1.692 | 1.631 | 1.503 | 0.894 | 0.209 | 92   | 87   | 78   | 34   | -51  | 4.31E-6        | 2.50E-5 | >             | 9.66E-5 |         |
| K-562                             | 0.188     | 1.711                                 | 1.698 | 1.728 | 1.657 | 0.760 | 0.135 | 99   | 101  | 96   | 38   | -28  | 6.15E-6        | 3.71E-5 | >             | 1.00E-4 |         |
| MOLT-4                            | 0.400     | 1.851                                 | 1.854 | 1.762 | 1.731 | 0.981 | 0.260 | 100  | 94   | 92   | 40   | -35  | 6.42E-6        | 3.42E-5 | >             | 1.00E-4 |         |
| RPMI-8226                         | 0.462     | 2.371                                 | 2.231 | 2.370 | 2.293 | 1.172 | 0.392 | 98   | 100  | 96   | 37   | -15  | 6.05E-6        | 5.13E-5 | >             | 1.00E-4 |         |
| SR                                | 0.207     | 0.639                                 | 0.582 | 0.597 | 0.593 | 0.470 | 0.168 | 87   | 90   | 89   | 61   | -19  | 1.37E-5        | 5.80E-5 | >             | 1.00E-4 |         |
| <b>Non-Small Cell Lung Cancer</b> |           |                                       |       |       |       |       |       |      |      |      |      |      |                |         |               |         |         |
| A549/ATCC                         | 0.300     | 2.029                                 | 2.084 | 1.902 | 1.977 | 1.379 | 0.199 | 103  | 93   | 97   | 62   | -34  | 1.35E-5        | 4.46E-5 | >             | 1.00E-4 |         |
| EKVX                              | 0.620     | 1.997                                 | 1.890 | 1.973 | 1.907 | 1.557 | 0.330 | 92   | 98   | 93   | 68   | -47  | 1.44E-5        | 3.91E-5 | >             | 1.00E-4 |         |
| HOP-62                            | 0.629     | 2.138                                 | 2.142 | 2.067 | 2.074 | 1.553 | 0.216 | 100  | 95   | 96   | 61   | -66  | 1.23E-5        | 3.04E-5 | >             | 7.52E-5 |         |
| HOP-92                            | 1.277     | 1.743                                 | 1.675 | 1.644 | 1.673 | 1.420 | 0.527 | 85   | 79   | 85   | 31   | -59  | 4.41E-6        | 2.20E-5 | >             | 7.98E-5 |         |
| NCI-H226                          | 0.708     | 1.822                                 | 1.851 | 1.775 | 1.739 | 1.588 | 0.631 | 103  | 96   | 93   | 79   | -11  | 2.10E-5        | 7.55E-5 | >             | 1.00E-4 |         |
| NCI-H23                           | 0.490     | 1.705                                 | 1.645 | 1.637 | 1.726 | 1.610 | 0.328 | 95   | 94   | 102  | 92   | -33  | 2.17E-5        | 5.44E-5 | >             | 1.00E-4 |         |
| NCI-H322M                         | 0.801     | 2.140                                 | 2.097 | 2.107 | 2.129 | 1.825 | 0.542 | 97   | 98   | 99   | 76   | -32  | 1.75E-5        | 5.04E-5 | >             | 1.00E-4 |         |
| NCI-H460                          | 0.224     | 2.137                                 | 2.230 | 2.176 | 2.188 | 1.394 | 0.086 | 105  | 102  | 103  | 61   | -62  | 1.23E-5        | 3.15E-5 | >             | 8.04E-5 |         |
| NCI-H522                          | 0.898     | 2.708                                 | 2.646 | 2.645 | 2.664 | 2.362 | 0.239 | 97   | 96   | 98   | 81   | -73  | 1.59E-5        | 3.34E-5 | >             | 7.05E-5 |         |
| <b>Colon Cancer</b>               |           |                                       |       |       |       |       |       |      |      |      |      |      |                |         |               |         |         |
| COLO 205                          | 0.562     | 2.166                                 | 2.260 | 2.207 | 2.327 | 1.879 | 0.154 | 106  | 103  | 110  | 82   | -73  | 1.61E-5        | 3.39E-5 | >             | 7.14E-5 |         |
| HCC-2998                          | 1.039     | 3.189                                 | 3.175 | 3.061 | 3.167 | 2.321 | 0.236 | 99   | 94   | 99   | 60   | -77  | 1.18E-5        | 2.72E-5 | >             | 6.32E-5 |         |
| HCT-116                           | 0.260     | 2.386                                 | 2.384 | 2.357 | 2.434 | 0.479 | 0.021 | 100  | 99   | 102  | 10   | -92  | 3.70E-6        | 1.26E-5 | >             | 3.89E-5 |         |
| HCT-15                            | 0.372     | 2.452                                 | 2.390 | 2.448 | 2.227 | 1.098 | 0.071 | 97   | 100  | 89   | 35   | -81  | 5.27E-6        | 2.00E-5 | >             | 5.41E-5 |         |
| HT29                              | 0.484     | 2.892                                 | 2.839 | 2.778 | 2.840 | 2.021 | 0.154 | 98   | 95   | 98   | 64   | -68  | 1.27E-5        | 3.04E-5 | >             | 7.28E-5 |         |
| KM12                              | 0.473     | 2.293                                 | 2.338 | 2.425 | 2.406 | 1.787 | 0.244 | 102  | 107  | 106  | 72   | -48  | 1.53E-5        | 3.97E-5 | >             | 1.00E-4 |         |
| SW-620                            | 0.330     | 2.104                                 | 2.212 | 2.222 | 2.217 | 1.536 | 0.134 | 106  | 107  | 106  | 68   | -60  | 1.38E-5        | 3.41E-5 | >             | 8.42E-5 |         |
| <b>CNS Cancer</b>                 |           |                                       |       |       |       |       |       |      |      |      |      |      |                |         |               |         |         |
| SF-268                            | 0.665     | 2.194                                 | 2.295 | 2.347 | 2.170 | 1.618 | 0.454 | 107  | 110  | 98   | 62   | -32  | 1.35E-5        | 4.60E-5 | >             | 1.00E-4 |         |
| SF-295                            | 0.856     | 2.789                                 | 2.648 | 2.830 | 2.763 | 1.677 | 0.349 | 93   | 102  | 99   | 42   | -59  | 7.34E-6        | 2.62E-5 | >             | 8.11E-5 |         |
| SF-539                            | 0.766     | 2.261                                 | 2.219 | 2.243 | 2.195 | 1.376 | 0.176 | 97   | 99   | 96   | 41   | -77  | 6.79E-6        | 2.22E-5 | >             | 5.89E-5 |         |
| SNB-19                            | 0.521     | 1.836                                 | 1.802 | 1.825 | 1.801 | 1.051 | 0.057 | 97   | 99   | 97   | 40   | -89  | 6.76E-6        | 2.05E-5 | >             | 4.99E-5 |         |
| SNB-75                            | 1.299     | 2.184                                 | 2.130 | 2.027 | 2.113 | 1.778 | 0.923 | 94   | 82   | 92   | 54   | -29  | 1.12E-5        | 4.48E-5 | >             | 1.00E-4 |         |
| U251                              | 0.284     | 1.636                                 | 1.613 | 1.506 | 1.542 | 0.793 | 0.079 | 98   | 90   | 93   | 38   | -72  | 5.98E-6        | 2.20E-5 | >             | 6.26E-5 |         |
| <b>Melanoma</b>                   |           |                                       |       |       |       |       |       |      |      |      |      |      |                |         |               |         |         |
| LOX IMVI                          | 0.198     | 1.377                                 | 1.549 | 1.333 | 1.425 | 1.141 | 0.279 | 115  | 96   | 104  | 80   | 7    | 2.57E-5        | >       | 1.00E-4       | >       | 1.00E-4 |
| MALME-3M                          | 0.681     | 1.386                                 | 1.386 | 1.375 | 1.360 | 1.237 | 0.295 | 100  | 98   | 96   | 79   | -57  | 1.63E-5        | 3.82E-5 | >             | 8.93E-5 |         |
| M14                               | 0.451     | 1.753                                 | 1.691 | 1.725 | 1.754 | 0.940 | 0.269 | 95   | 98   | 100  | 38   | -40  | 6.31E-6        | 3.03E-5 | >             | 1.00E-4 |         |
| MDA-MB-435                        | 0.595     | 2.555                                 | 2.595 | 2.495 | 2.546 | 1.381 | 0.304 | 102  | 97   | 100  | 40   | -49  | 6.81E-6        | 2.82E-5 | >             | 1.00E-4 |         |
| SK-MEL-2                          | 1.479     | 2.984                                 | 3.058 | 3.008 | 3.004 | 2.637 | 0.561 | 105  | 102  | 101  | 77   | -62  | 1.56E-5        | 3.57E-5 | >             | 8.18E-5 |         |
| SK-MEL-28                         | 0.488     | 1.445                                 | 1.449 | 1.375 | 1.403 | 0.893 | 0.077 | 100  | 93   | 96   | 42   | -84  | 7.17E-6        | 2.16E-5 | >             | 5.36E-5 |         |
| SK-MEL-5                          | 0.911     | 3.390                                 | 3.391 | 3.390 | 3.339 | 2.431 | 0.175 | 100  | 100  | 98   | 61   | -81  | 1.20E-5        | 2.70E-5 | >             | 6.07E-5 |         |
| UACC-257                          | 1.111     | 2.786                                 | 2.663 | 2.629 | 2.684 | 2.480 | 0.723 | 93   | 91   | 94   | 82   | -35  | 1.87E-5        | 5.02E-5 | >             | 1.00E-4 |         |
| UACC-62                           | 0.783     | 2.512                                 | 2.382 | 2.370 | 2.393 | 1.830 | 0.045 | 93   | 92   | 93   | 61   | -94  | 1.17E-5        | 2.46E-5 | >             | 5.17E-5 |         |
| <b>Ovarian Cancer</b>             |           |                                       |       |       |       |       |       |      |      |      |      |      |                |         |               |         |         |
| IGROV1                            | 0.835     | 2.556                                 | 2.582 | 2.578 | 2.641 | 1.585 | 0.198 | 101  | 101  | 105  | 44   | -76  | 7.85E-6        | 2.31E-5 | >             | 6.03E-5 |         |
| OVCAR-3                           | 0.555     | 1.855                                 | 2.012 | 1.919 | 1.858 | 1.421 | 0.258 | 112  | 105  | 100  | 67   | -54  | 1.37E-5        | 3.58E-5 | >             | 9.33E-5 |         |
| OVCAR-4                           | 1.008     | 2.149                                 | 2.117 | 2.133 | 2.087 | 1.513 | 0.771 | 97   | 99   | 95   | 44   | -24  | 7.68E-6        | 4.49E-5 | >             | 1.00E-4 |         |
| OVCAR-5                           | 0.709     | 1.572                                 | 1.519 | 1.485 | 1.493 | 1.521 | 0.037 | 94   | 90   | 91   | 94   | -95  | 1.71E-5        | 3.15E-5 | >             | 5.79E-5 |         |
| OVCAR-8                           | 0.464     | 2.421                                 | 2.397 | 2.398 | 2.440 | 1.759 | 0.399 | 99   | 99   | 101  | 66   | -14  | 1.59E-5        | 6.69E-5 | >             | 1.00E-4 |         |
| SK-OV-3                           | 0.994     | 2.149                                 | 2.141 | 2.127 | 2.241 | 2.125 | 0.386 | 99   | 98   | 108  | 98   | -61  | 2.00E-5        | 4.12E-5 | >             | 8.50E-5 |         |
| <b>Renal Cancer</b>               |           |                                       |       |       |       |       |       |      |      |      |      |      |                |         |               |         |         |
| 786-0                             | 0.583     | 2.360                                 | 2.227 | 2.176 | 2.281 | 0.646 | 0.105 | 93   | 90   | 96   | 4    | -82  | 3.13E-6        | 1.10E-5 | >             | 4.22E-5 |         |
| A498                              | 1.209     | 1.855                                 | 1.885 | 1.870 | 1.867 | 1.789 | 0.779 | 105  | 102  | 102  | 90   | -36  | 2.07E-5        | 5.20E-5 | >             | 1.00E-4 |         |
| ACHN                              | 0.375     | 1.662                                 | 1.675 | 1.695 | 1.690 | 1.071 | 0.306 | 101  | 103  | 102  | 54   | -18  | 1.14E-5        | 5.57E-5 | >             | 1.00E-4 |         |
| CAKI-1                            | 0.550     | 2.128                                 | 1.960 | 2.006 | 2.064 | 1.871 | 0.440 | 89   | 92   | 96   | 84   | -20  | 2.11E-5        | 6.41E-5 | >             | 1.00E-4 |         |
| RFX 393                           | 0.898     | 1.857                                 | 1.861 | 1.745 | 1.783 | 1.489 | 0.725 | 100  | 88   | 92   | 62   | -19  | 1.39E-5        | 5.77E-5 | >             | 1.00E-4 |         |
| SN12C                             | 1.086     | 3.182                                 | 3.153 | 3.017 | 3.037 | 2.123 | 0.487 | 99   | 92   | 93   | 49   | -55  | 9.73E-6        | 2.97E-5 | >             | 8.92E-5 |         |
| TK-10                             | 1.345     | 3.000                                 | 2.897 | 2.916 | 2.822 | 2.755 | 1.395 | 94   | 95   | 89   | 85   | 3    | 2.68E-5        | >       | 1.00E-4       | >       | 1.00E-4 |
| UO-31                             | 0.743     | 2.247                                 | 2.116 | 2.133 | 2.114 | 1.521 | 0.402 | 91   | 92   | 91   | 52   | -46  | 1.04E-5        | 3.39E-5 | >             | 1.00E-4 |         |
| <b>Prostate Cancer</b>            |           |                                       |       |       |       |       |       |      |      |      |      |      |                |         |               |         |         |
| PC-3                              | 0.557     | 2.330                                 | 2.168 | 2.216 | 2.200 | 1.089 | 0.430 | 91   | 94   | 93   | 30   | -23  | 4.79E-6        | 3.70E-5 | >             | 1.00E-4 |         |
| DU-145                            | 0.455     | 1.941                                 | 1.998 | 1.963 | 1.940 | 1.635 | 0.530 | 104  | 101  | 100  | 79   | 5    | 2.49E-5        | >       | 1.00E-4       | >       | 1.00E-4 |
| <b>Breast Cancer</b>              |           |                                       |       |       |       |       |       |      |      |      |      |      |                |         |               |         |         |
| MCF7                              | 0.401     | 2.123                                 | 2.069 | 2.003 | 2.061 | 1.659 | 0.334 | 97   | 93   | 96   | 73   | -17  | 1.81E-5        | 6.51E-5 | >             | 1.00E-4 |         |
| MDA-MB-231/ATCC                   | 0.528     | 1.193                                 | 1.203 | 1.179 | 1.206 | 1.149 | 0.290 | 101  | 98   | 102  | 93   | -45  | 2.06E-5        | 4.72E-5 | >             | 1.00E-4 |         |
| HS 578T                           | 1.518     | 2.586                                 | 2.484 | 2.471 | 2.477 | 1.962 | 1.080 | 90   | 89   | 90   | 42   | -29  | 6.67E-6        | 3.89E-5 | >             | 1.00E-4 |         |
| BT-549                            | 1.169     | 2.129                                 | 2.101 | 1.963 | 1.941 | 0.882 | 0.441 | 97   | 83   | 80   | -25  | -62  | 1.95E-6        | 5.83E-6 | >             | 4.71E-5 |         |
| T-47D                             | 1.830     | 3.288                                 | 3.253 | 3.195 | 3.186 | 2.725 | 1.504 | 98   | 94   | 93   | 61   | -18  | 1.39E-5        | 5.95E-5 | >             | 1.00E-4 |         |
| MDA-MB-468                        | 0.688     | 1.723                                 | 1.719 | 1.743 | 1.752 | 1.501 | 0.532 | 100  | 102  | 103  | 79   | -23  | 1.91E-5        | 5.97E-5 | >             | 1.00E-4 |         |

# Compound 60

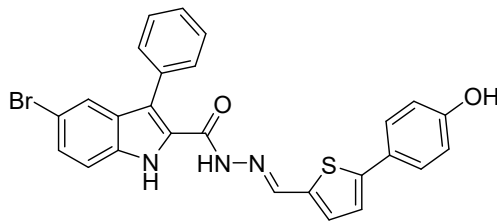

National Cancer Institute Developmental Therapeutics Program  
Dose Response Curves

NSC: D - 838305 / 1  
Report Date: December 19, 2022

SSPL: 1BCH  
Test Date: September 19, 2022

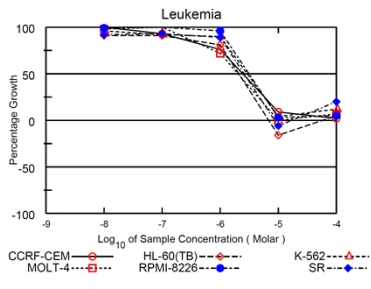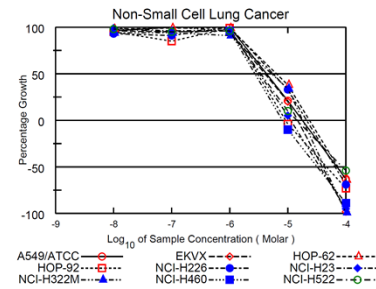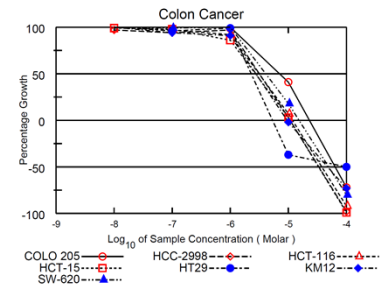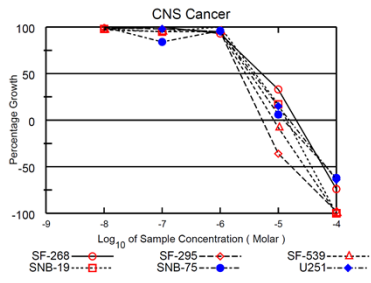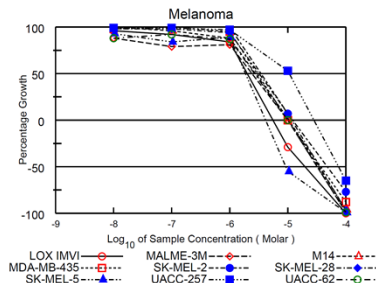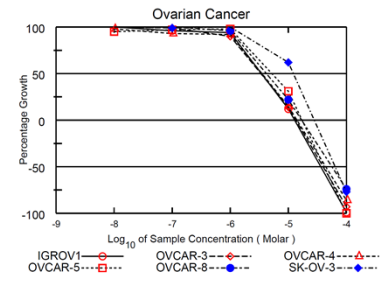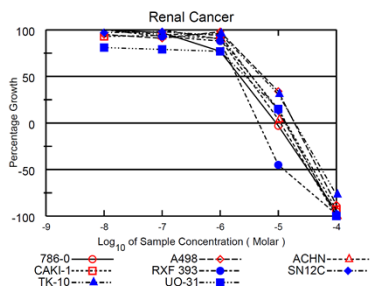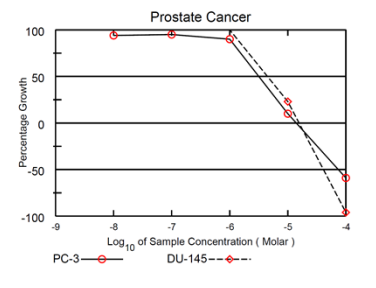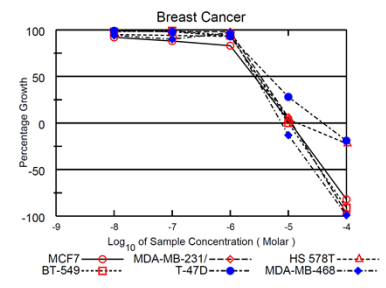

## National Cancer Institute Developmental Therapeutics Program In-Vitro Testing Results

| NSC : D - 838305 / 1              |           | Experiment ID : 2209NS52              |       |       |       |       |        |      |      |      |      | Test Type : 08 |         | Units : Molar |           |  |
|-----------------------------------|-----------|---------------------------------------|-------|-------|-------|-------|--------|------|------|------|------|----------------|---------|---------------|-----------|--|
| Report Date : December 19, 2022   |           | Test Date : September 19, 2022        |       |       |       |       |        |      |      |      |      | QNS :          |         | MC :          |           |  |
| COMI : TO40                       |           | Stain Reagent : SRB Dual-Pass Related |       |       |       |       |        |      |      |      |      | SSPL : 1BCH    |         |               |           |  |
| Panel/Cell Line                   | Time Zero | Log10 Concentration                   |       |       |       |       |        |      |      |      |      | GI50           | TGI     | LC50          |           |  |
|                                   |           | Ctrl                                  | -8.0  | -7.0  | -6.0  | -5.0  | -4.0   | -8.0 | -7.0 | -6.0 | -5.0 |                |         |               | -4.0      |  |
| <b>Leukemia</b>                   |           |                                       |       |       |       |       |        |      |      |      |      |                |         |               |           |  |
| CCRF-CEM                          | 0.482     | 2.216                                 | 2.253 | 2.090 | 1.804 | 0.639 | 0.514  | 102  | 93   | 76   | 9    | 2              | 2.46E-6 | > 1.00E-4     | > 1.00E-4 |  |
| HL-60(TB)                         | 0.593     | 2.036                                 | 1.902 | 1.913 | 1.766 | 0.498 | 0.664  | 91   | 91   | 81   | -16  | 5              | 2.10E-6 | .             | > 1.00E-4 |  |
| K-562                             | 0.227     | 2.093                                 | 2.024 | 1.944 | 1.913 | 0.308 | 0.445  | 96   | 92   | 90   | 4    | 12             | 2.94E-6 | > 1.00E-4     | > 1.00E-4 |  |
| MOLT-4                            | 0.570     | 2.163                                 | 2.129 | 2.325 | 1.723 | 0.568 | 0.677  | 98   | 110  | 72   | 0    | 7              | 2.03E-6 | .             | > 1.00E-4 |  |
| RPMI-8226                         | 0.778     | 2.819                                 | 2.798 | 2.842 | 2.741 | 0.846 | 0.874  | 99   | 101  | 96   | 3    | 5              | 3.14E-6 | > 1.00E-4     | > 1.00E-4 |  |
| SR                                | 0.428     | 2.103                                 | 1.970 | 1.978 | 1.919 | 0.404 | 0.757  | 92   | 93   | 89   | -6   | 20             | 2.58E-6 | .             | > 1.00E-4 |  |
| <b>Non-Small Cell Lung Cancer</b> |           |                                       |       |       |       |       |        |      |      |      |      |                |         |               |           |  |
| A549/ATCC                         | 0.360     | 2.484                                 | 2.396 | 2.605 | 2.496 | 0.796 | 0.135  | 96   | 106  | 101  | 21   | -63            | 4.28E-6 | 1.77E-5       | 7.05E-5   |  |
| EKVX                              | 0.599     | 1.788                                 | 1.739 | 1.723 | 1.743 | 0.838 | 0.009  | 96   | 95   | 96   | 20   | -98            | 4.04E-6 | 1.48E-5       | 3.90E-5   |  |
| HOP-62                            | 0.661     | 2.510                                 | 2.471 | 2.493 | 2.483 | 1.362 | 0.241  | 98   | 99   | 99   | 38   | -64            | 6.32E-6 | 2.36E-5       | 7.34E-5   |  |
| HOP-92                            | 1.343     | 1.836                                 | 1.813 | 1.763 | 1.830 | 1.288 | 0.360  | 95   | 85   | 99   | -4   | -73            | 2.98E-6 | 9.12E-6       | 4.61E-5   |  |
| NCI-H226                          | 0.921     | 1.863                                 | 1.801 | 1.778 | 1.886 | 1.228 | 0.281  | 93   | 91   | 102  | 33   | -69            | 5.63E-6 | 2.09E-5       | 6.44E-5   |  |
| NCI-H23                           | 0.586     | 1.736                                 | 1.722 | 1.690 | 1.702 | 0.645 | 0.029  | 99   | 96   | 97   | 5    | -95            | 3.25E-6 | 1.12E-5       | 3.55E-5   |  |
| NCI-H322M                         | 0.694     | 1.940                                 | 1.871 | 1.862 | 1.829 | 1.112 | 0.007  | 94   | 94   | 91   | 34   | -99            | 5.18E-6 | 1.79E-5       | 4.27E-5   |  |
| NCI-H460                          | 0.245     | 2.707                                 | 2.793 | 2.858 | 2.620 | 0.220 | 0.028  | 103  | 106  | 96   | -10  | -89            | 2.72E-6 | 7.99E-6       | 3.21E-5   |  |
| NCI-H522                          | 0.878     | 2.779                                 | 2.739 | 2.676 | 2.704 | 1.066 | 0.408  | 98   | 95   | 96   | 10   | -54            | 3.42E-6 | 1.43E-5       | 8.78E-5   |  |
| <b>Colon Cancer</b>               |           |                                       |       |       |       |       |        |      |      |      |      |                |         |               |           |  |
| COLO 205                          | 0.361     | 1.677                                 | 1.761 | 1.721 | 1.707 | 0.900 | 0.100  | 106  | 103  | 102  | 41   | -72            | 7.12E-6 | 2.30E-5       | 6.35E-5   |  |
| HCC-2998                          | 0.725     | 2.611                                 | 2.560 | 2.504 | 2.563 | 0.775 | 0.015  | 97   | 94   | 97   | 3    | -98            | 3.16E-6 | 1.06E-5       | 3.34E-5   |  |
| HCT-116                           | 0.310     | 2.869                                 | 2.904 | 2.801 | 2.658 | 0.479 | 0.026  | 101  | 97   | 92   | 7    | -92            | 3.09E-6 | 1.17E-5       | 3.77E-5   |  |
| HCT-15                            | 0.403     | 2.394                                 | 2.375 | 2.362 | 2.122 | 0.456 | 0.005  | 99   | 98   | 86   | 3    | -99            | 2.72E-6 | 1.06E-5       | 3.30E-5   |  |
| HT29                              | 0.322     | 2.413                                 | 2.459 | 2.333 | 2.401 | 0.203 | 0.160  | 102  | 96   | 99   | -37  | -50            | 2.30E-6 | 5.36E-6       | 9.24E-5   |  |
| KM12                              | 0.460     | 2.313                                 | 2.374 | 2.196 | 2.150 | 0.451 | 0.122  | 103  | 94   | 91   | -2   | -73            | 2.77E-6 | 9.53E-6       | 4.70E-5   |  |
| SW-620                            | 0.252     | 2.228                                 | 2.317 | 2.208 | 2.272 | 0.601 | 0.051  | 105  | 99   | 102  | 18   | -80            | 4.14E-6 | 1.52E-5       | 4.95E-5   |  |
| <b>CNS Cancer</b>                 |           |                                       |       |       |       |       |        |      |      |      |      |                |         |               |           |  |
| SF-268                            | 0.976     | 2.746                                 | 2.707 | 2.771 | 2.618 | 1.556 | 0.255  | 98   | 101  | 93   | 33   | -74            | 5.16E-6 | 2.03E-5       | 5.97E-5   |  |
| SF-295                            | 0.762     | 2.406                                 | 2.391 | 2.378 | 2.322 | 0.484 | 0.014  | 99   | 98   | 95   | -36  | -98            | 2.20E-6 | 5.28E-6       | 1.66E-5   |  |
| SF-539                            | 0.981     | 2.607                                 | 2.553 | 2.523 | 2.533 | 0.906 | 0.002  | 97   | 95   | 95   | -8   | -100           | 2.76E-6 | 8.43E-6       | 2.88E-5   |  |
| SNB-19                            | 0.760     | 2.232                                 | 2.203 | 2.160 | 2.236 | 1.010 | 0.002  | 98   | 95   | 100  | 17   | -100           | 4.01E-6 | 1.40E-5       | 3.74E-5   |  |
| SNB-75                            | 1.280     | 2.168                                 | 2.171 | 2.029 | 2.134 | 1.338 | 0.488  | 100  | 84   | 96   | 6    | -62            | 3.27E-6 | 1.24E-5       | 6.70E-5   |  |
| U251                              | 0.321     | 1.865                                 | 1.937 | 1.827 | 1.780 | 0.553 | 0.115  | 105  | 98   | 95   | 15   | -64            | 3.63E-6 | 1.55E-5       | 6.60E-5   |  |
| <b>Melanoma</b>                   |           |                                       |       |       |       |       |        |      |      |      |      |                |         |               |           |  |
| LOX IMVI                          | 0.420     | 2.355                                 | 2.280 | 2.204 | 2.048 | 0.297 | -0.002 | 96   | 92   | 84   | -29  | -100           | 2.00E-6 | 5.51E-6       | 1.96E-5   |  |
| MALME-3M                          | 0.720     | 1.500                                 | 1.409 | 1.337 | 1.356 | 0.714 | 0.007  | 88   | 79   | 81   | 0    | -99            | 2.41E-6 | 9.77E-6       | 3.17E-5   |  |
| M14                               | 0.451     | 1.785                                 | 1.781 | 1.738 | 1.621 | 0.478 | 0.018  | 100  | 96   | 88   | 2    | -96            | 2.75E-6 | 1.05E-5       | 3.39E-5   |  |
| MDA-MB-435                        | 0.514     | 2.330                                 | 2.289 | 2.328 | 2.236 | 0.523 | 0.062  | 98   | 100  | 95   | 0    | -88            | 2.99E-6 | 1.01E-5       | 3.72E-5   |  |
| SK-MEL-2                          | 1.139     | 2.569                                 | 2.563 | 2.569 | 2.563 | 1.246 | 0.260  | 100  | 100  | 100  | 7    | -77            | 3.45E-6 | 1.22E-5       | 4.77E-5   |  |
| SK-MEL-28                         | 0.644     | 1.854                                 | 1.833 | 1.827 | 1.781 | 0.734 | 0.018  | 98   | 98   | 94   | 7    | -97            | 3.22E-6 | 1.18E-5       | 3.54E-5   |  |
| SK-MEL-5                          | 0.853     | 2.969                                 | 2.814 | 2.638 | 2.738 | 0.385 | 0.008  | 93   | 84   | 89   | -55  | -99            | 1.07E-6 | 4.16E-6       | 9.25E-6   |  |
| UACC-257                          | 0.935     | 2.570                                 | 2.547 | 2.548 | 2.529 | 1.796 | 0.325  | 99   | 99   | 97   | 53   | -65            | 1.85E-6 | 2.80E-5       | 7.43E-5   |  |
| UACC-62                           | 0.971     | 2.818                                 | 2.593 | 2.663 | 2.573 | 0.972 | 0.014  | 88   | 92   | 87   | 0    | -99            | 2.65E-6 | 1.00E-5       | 3.22E-5   |  |
| <b>Ovarian Cancer</b>             |           |                                       |       |       |       |       |        |      |      |      |      |                |         |               |           |  |
| IGROV1                            | 0.756     | 2.558                                 | 2.554 | 2.495 | 2.446 | 0.981 | 0.006  | 100  | 96   | 94   | 12   | -99            | 3.45E-6 | 1.29E-5       | 3.62E-5   |  |
| OVCAR-3                           | 0.390     | 1.519                                 | 1.600 | 1.511 | 1.406 | 0.552 | 0.027  | 107  | 99   | 90   | 14   | -93            | 3.38E-6 | 1.36E-5       | 3.97E-5   |  |
| OVCAR-4                           | 1.095     | 2.367                                 | 2.343 | 2.282 | 2.269 | 1.285 | 0.155  | 98   | 93   | 92   | 15   | -86            | 3.52E-6 | 1.41E-5       | 4.40E-5   |  |
| OVCAR-5                           | 0.558     | 1.372                                 | 1.333 | 1.347 | 1.354 | 0.807 | -0.006 | 95   | 97   | 98   | 31   | -100           | 5.15E-6 | 1.72E-5       | 4.14E-5   |  |
| OVCAR-8                           | 0.462     | 2.447                                 | 2.499 | 2.460 | 2.377 | 0.902 | 0.120  | 103  | 101  | 96   | 22   | -74            | 4.22E-6 | 1.70E-5       | 5.63E-5   |  |
| SK-OV-3                           | 0.783     | 2.098                                 | 2.143 | 2.082 | 2.169 | 1.596 | 0.177  | 103  | 99   | 105  | 62   | -77            | 1.22E-5 | 2.78E-5       | 6.36E-5   |  |
| <b>Renal Cancer</b>               |           |                                       |       |       |       |       |        |      |      |      |      |                |         |               |           |  |
| 786-0                             | 0.895     | 2.834                                 | 2.847 | 2.777 | 2.379 | 0.869 | 0.046  | 101  | 97   | 77   | -3   | -95            | 2.16E-6 | 9.19E-6       | 3.25E-5   |  |
| A498                              | 1.295     | 2.029                                 | 1.991 | 1.967 | 2.013 | 1.543 | 0.157  | 95   | 91   | 98   | 34   | -88            | 5.57E-6 | 1.89E-5       | 4.88E-5   |  |
| ACHN                              | 0.707     | 2.654                                 | 2.655 | 2.677 | 2.458 | 0.786 | -0.003 | 100  | 101  | 90   | 4    | -100           | 2.92E-6 | 1.09E-5       | 3.31E-5   |  |
| CAKI-1                            | 0.596     | 2.178                                 | 2.064 | 2.086 | 2.031 | 0.836 | 0.044  | 93   | 94   | 91   | 15   | -93            | 3.46E-6 | 1.38E-5       | 4.02E-5   |  |
| RXF 393                           | 1.184     | 1.835                                 | 1.832 | 1.789 | 1.754 | 0.649 | 0.020  | 100  | 93   | 88   | -45  | -98            | 1.92E-6 | 4.56E-6       | 1.23E-5   |  |
| SN12C                             | 1.270     | 3.291                                 | 3.235 | 3.244 | 3.176 | 1.525 | 0.011  | 97   | 98   | 94   | 13   | -99            | 3.48E-6 | 1.30E-5       | 3.63E-5   |  |
| TK-10                             | 0.988     | 2.746                                 | 2.762 | 2.662 | 2.672 | 1.528 | 0.228  | 101  | 95   | 96   | 31   | -77            | 5.05E-6 | 1.93E-5       | 5.62E-5   |  |
| UO-31                             | 0.786     | 2.406                                 | 2.102 | 2.067 | 2.029 | 1.026 | -0.002 | 81   | 79   | 77   | 15   | -100           | 2.70E-6 | 1.35E-5       | 3.67E-5   |  |
| <b>Prostate Cancer</b>            |           |                                       |       |       |       |       |        |      |      |      |      |                |         |               |           |  |
| PC-3                              | 0.720     | 2.499                                 | 2.388 | 2.410 | 2.327 | 0.895 | 0.295  | 94   | 95   | 90   | 10   | -59            | 3.17E-6 | 1.39E-5       | 7.39E-5   |  |
| DU-145                            | 0.503     | 2.101                                 | 2.170 | 2.151 | 2.100 | 0.875 | 0.021  | 104  | 103  | 100  | 23   | -96            | 4.48E-6 | 1.57E-5       | 4.12E-5   |  |
| <b>Breast Cancer</b>              |           |                                       |       |       |       |       |        |      |      |      |      |                |         |               |           |  |
| MCF7                              | 0.508     | 2.253                                 | 2.119 | 2.043 | 1.950 | 0.564 | 0.093  | 92   | 88   | 83   | 3    | -82            | 2.57E-6 | 1.09E-5       | 4.23E-5   |  |
| MDA-MB-231/ATCC                   | 0.634     | 1.349                                 | 1.343 | 1.335 | 1.339 | 0.680 | 0.021  | 99   | 98   | 98   | 6    | -97            | 3.36E-6 | 1.15E-5       | 3.52E-5   |  |
| HS 578T                           | 1.085     | 2.148                                 | 2.100 | 2.089 | 2.069 | 1.126 | 0.848  | 95   | 94   | 93   | 4    | -22            | 3.02E-6 | 1.41E-5       | > 1.00E-4 |  |
| BT-549                            | 1.003     | 2.135                                 | 2.113 | 2.121 | 2.072 | 1.002 | 0.095  | 98   | 99   | 94   | 0    | -91            | 2.95E-6 | 9.98E-6       | 3.56E-5   |  |
| T-47D                             | 0.952     | 2.411                                 | 2.396 | 2.381 | 2.311 | 1.362 | 0.771  | 99   | 98   | 93   | 28   | -19            | 4.60E-6 | 3.94E-5       | > 1.00E-4 |  |
| MDA-MB-468                        | 0.702     | 1.639                                 | 1.582 | 1.542 | 1.613 | 0.608 | 0.006  | 94   | 90   | 97   | -13  | -99            | 2.67E-6 | 7.57E-6       | 2.67E-5   |  |

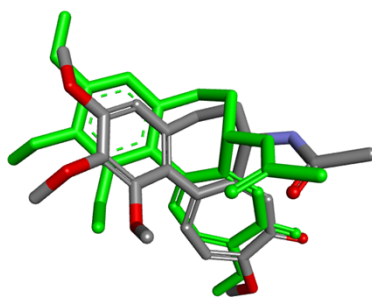

**Figure S3.** Overlay between co-crystallised colchicine (green) and top scoring re-docked colchicine conformation using the GoldScore scoring function. The RMSD of heavy atoms was calculated to be 1.33 Å.

**Table S2.** The best docking scores of potent anti-tubulin furanyl- and thiophenyl-3-phenyl-1*H*-indole-2-carbohydrazide derivatives calculated using the GoldScore scoring function.

| Compound   | Colchicine site | Maytansine site | <i>Vinca</i> alkaloid site |
|------------|-----------------|-----------------|----------------------------|
| Colchicine | 59.20           | -               | -                          |
| 5a         | 58.02           | 43.43           | 53.79                      |
| 5b         | 62.35           | 47.56           | 58.17                      |
| 5f         | 61.49           | 44.53           | 56.45                      |
| 5k         | 71.03           | 53.00           | 57.79                      |
| 6h         | 64.32           | 45.11           | 61.38                      |
| 6j         | 62.76           | 52.40           | 59.34                      |

**Table S3.** The physicochemical properties of the newly synthesised furanyl- and thiophenyl-3-phenyl-1*H*-indole-2-carbohydrazide derivatives.

| <b>Derivatives</b> | <b>Molecular weight (g/mol)</b> | <b>MlogP</b> | <b>Hydrogen bond donor</b> | <b>Hydrogen bond acceptor</b> | <b>Polar surface area (Å<sup>2</sup>)</b> | <b>Rotatable bond count</b> |
|--------------------|---------------------------------|--------------|----------------------------|-------------------------------|-------------------------------------------|-----------------------------|
| <b>5e</b>          | 433.28                          | 2.754        | 2                          | 5                             | 94.18                                     | 4                           |
| <b>5f</b>          | 453.27                          | 3.605        | 2                          | 6                             | 116.21                                    | 5                           |
| <b>5g</b>          | 529.37                          | 4.236        | 2                          | 6                             | 116.21                                    | 6                           |
| <b>5h</b>          | 514.4                           | 3.842        | 2                          | 5                             | 79.62                                     | 6                           |
| <b>5i</b>          | 528.38                          | 3.827        | 3                          | 6                             | 107.69                                    | 6                           |
| <b>5j</b>          | 528.38                          | 3.827        | 3                          | 6                             | 107.69                                    | 6                           |
| <b>5k</b>          | 500.37                          | 3.645        | 3                          | 5                             | 90.62                                     | 5                           |
| <b>6b</b>          | 424.34                          | 3.9          | 2                          | 3                             | 85.49                                     | 4                           |
| <b>6c</b>          | 458.78                          | 4.384        | 2                          | 3                             | 85.49                                     | 4                           |
| <b>6d</b>          | 503.23                          | 4.491        | 2                          | 3                             | 85.49                                     | 4                           |
| <b>6e</b>          | 449.35                          | 3.526        | 2                          | 4                             | 109.28                                    | 4                           |
| <b>6f</b>          | 469.34                          | 3.947        | 2                          | 5                             | 131.31                                    | 5                           |
| <b>6g</b>          | 468.16                          | 2.608        | 4                          | 5                             | 125.95                                    | 5                           |
| <b>6h</b>          | 454.37                          | 3.597        | 2                          | 4                             | 94.72                                     | 5                           |
| <b>6i</b>          | 454.37                          | 3.597        | 2                          | 4                             | 94.72                                     | 5                           |
| <b>6j</b>          | 454.37                          | 3.597        | 2                          | 4                             | 94.72                                     | 5                           |
| <b>6k</b>          | 545.44                          | 4.984        | 2                          | 5                             | 131.31                                    | 6                           |
| <b>6l</b>          | 530.47                          | 4.614        | 2                          | 4                             | 94.72                                     | 6                           |
| <b>6m</b>          | 544.45                          | 4.586        | 3                          | 5                             | 122.79                                    | 6                           |
| <b>6n</b>          | 544.45                          | 4.586        | 3                          | 5                             | 122.79                                    | 6                           |
| <b>6o</b>          | 516.44                          | 4.417        | 3                          | 4                             | 105.72                                    | 5                           |
